# Supplementary material for: Extremely High Mutation Rate of HIV-1 In Vivo
Source: PLoS Biol. 2015 Sep 16;13(9):e1002251. doi: 10.1371/journal.pbio.1002251 (PMC4574155; doi:10.1371/journal.pbio.1002251)
Supplement: S2 Data — The infection time, viral load, and CD4 count are provided for each patient sample. (XLSX) [file pbio.1002251.s002.xlsx]

## Sheet: Sheet2
P6_years_seroconversion	P6_viral_load	P6_CD4	R14_years_seroconversion	R14_viral_load	R14_CD4	R11_years_seroconversion	R11_viral_load	R11_CD4	R15_years_seroconversion	R15_viral_load	R15_CD4	R4_years_seroconversion	R4_viral_load	R4_CD4	R9_years_seroconversion	R9_viral_load	R9_CD4	R3_years_seroconversion	R3_viral_load	R3_CD4	R8_years_seroconversion	R8_viral_load	R8_CD4	R6_years_seroconversion	R6_viral_load	R6_CD4	R5_years_seroconversion	R5_viral_load	R5_CD4	R7_years_seroconversion	R7_viral_load	R7_CD4
0		1496	0	16398	559	0	6901	698	0	79432.8	660	0	229259	775	0	8620	852	0.947945	21175	607	0.99726	24760	338	0.964384	97580	752	0.0356164	119415	843	0.0493151	39603	981
0.578082		1219	0.254795	23399	637	0.517808	8413	571	0.665753	63095.7	486	0.249315	74553	537	0.372603	12522	1146	1.31233	500000	380	1.14521		360	1.3726	4095	617	0.30411	41695	496	0.419178	57616	802
1.13973		1243	0.421918	23800	812	0.958904	8515	689	1.24384	15848.9	446	0.761644	17064	759	0.90137	4790	981	1.50411	291872	431	1.30411		290	1.75068	51578	417	1.10959	277153	426	0.860274	121192	614
1.69863		1116	0.783562	20200	651	1.38082	5341	530	2.61918	12589.3	391	1.16986	23097	762	1.39452	11783	936	1.69589	211622	360				2.15342	122965	337	1.32055	181509	409	1.03288	194191	455
2.62192		1200	0.99726	5330	598	1.93151	11876	483	3.25479	15848.9	406	1.64384	26824	707	1.8411	9692	681	1.77808	100300	300				2.54247	29915	340	1.40274	117035	315	1.31507	68022	358
3.05753		1036	1.30959	3060	558	2.39726	7013	419				2.16164	8076	439										3.09863	148684	218	1.6137	46655	460	1.6274	127531	291
3.72877		1047	1.55342	11000	687	2.89041	26539	480				2.49315	29816	662													1.61918	79218	413
4.25753		894	1.84658	15300	614																						1.81918	114076	432
4.97534		810	2.07123	19200	708																						2.14521	73908	352
5.74521	3551	649	2.4	20400	532																						2.22192	158932	270
6.01096	19347	766	2.5726	2570	482																						2.2411		236
6.20274	19347	1115	2.91781	14800	432
6.51233	9679	929	3.2411	34800	433
7.0137	18200	620	3.49589	68700	376
7.23836	7260	693
7.57808	22700	689
7.90411	19300	750
8.19726	16000	693
8.69315	21000	873
9.16712	48300	894
9.47671	21900	853
9.88493	13700	797
10.6712	16900	823
11.0384	27100	527
11.3178	14700	355
11.5123		525
11.6219		522
12.1644	16300	540
12.6877	11600	486
12.926	23200	636
13.2411	16900	495
13.6548	100001	631
14.0521	10700	566
14.5671	7219	559
14.9452	11400	525
15.5753	7160	620
16.1315	20999	553
16.5918	631	551
17.1315	13889	631
17.6658	22851	623
18.126	48881	507
18.7041	41615	394
19.2575	35625	554
19.7726	52600	625
20.2932	67900	438
20.6384	77100	410
