# Supplementary material for: Extremely High Mutation Rate of HIV-1 In Vivo
Source: PLoS Biol. 2015 Sep 16;13(9):e1002251. doi: 10.1371/journal.pbio.1002251 (PMC4574155; doi:10.1371/journal.pbio.1002251)
Supplement: S4 Data — For each patient and sequencing library, the total, A3G, A3D/F/H, and RT stops are indicated, and libraries are classified depending on the A3 mutation level (high/low). (XLSX) [file pbio.1002251.s004.xlsx]

## Sheet: Genome_map
P6					R3					R4					R5					R6					R7					R8					R9					R11					R14
gene	codon	TAA	TAG	TGA	gene	codon	TAA	TAG	TGA	gene	codon	TAA	TAG	TGA	gene	codon	TAA	TAG	TGA	gene	codon	TAA	TAG	TGA	gene	codon	TAA	TAG	TGA	gene	codon	TAA	TAG	TGA	gene	codon	TAA	TAG	TGA	gene	codon	TAA	TAG	TGA	gene	codon	TAA	TAG	TGA
gag	ATG	0	0	0	gag	ATG	0	0	0	gag	GAG	0	0	0	gag	ATG	0	0	0	gag	ATG	0	0	0	gag	ATG	0	0	0	gag	ATG	0	0	0	gag	ATG	0	0	0	gag	ATG	0	0	0	gag	ATG	0	0	0
gag	GGT	0	0	0	gag	GGT	0	0	0	gag	CTG	0	0	0	gag	GGT	0	0	0	gag	GGT	0	0	0	gag	GGT	0	0	0	gag	GGT	0	0	0	gag	GGT	0	0	0	gag	GGT	0	0	0	gag	GGT	0	0	0
gag	GCG	0	0	0	gag	GCG	0	0	0	gag	AGC	0	0	0	gag	GCG	0	0	0	gag	GCG	0	0	0	gag	GCG	0	0	0	gag	GCG	0	0	0	gag	GCG	0	0	0	gag	GCG	0	0	0	gag	GCG	0	0	0
gag	AGA	0	0	0	gag	AGA	0	0	0	gag	GAC	0	0	0	gag	AGA	0	0	0	gag	AGA	0	0	0	gag	AGA	0	0	0	gag	AGA	0	0	0	gag	AGA	0	0	0	gag	AGA	0	0	0	gag	AGA	0	0	0
gag	GCG	0	0	0	gag	GCG	0	0	0	gag	AAG	0	0	0	gag	GCG	0	0	0	gag	GCG	0	0	0	gag	GCG	0	0	0	gag	GCG	0	0	0	gag	GCG	0	0	0	gag	GCG	0	0	0	gag	GCG	0	0	0
gag	TCA	0	0	0	gag	TCA	0	0	0	gag	GAA	0	0	0	gag	TCA	0	0	0	gag	TCA	0	0	0	gag	TCA	0	0	0	gag	TCA	0	0	0	gag	TCA	0	0	0	gag	TCA	0	0	0	gag	TCA	0	0	0
gag	ATA	0	0	0	gag	GTA	0	0	0	gag	CTG	0	0	0	gag	GTA	0	0	0	gag	GTA	0	0	0	gag	GTA	0	0	0	gag	GTA	0	0	0	gag	GTA	0	0	0	gag	GTA	0	0	0	gag	GTA	0	0	0
gag	TTA	0	0	0	gag	TTA	0	0	0	gag	TAT	0	0	0	gag	ATA	0	0	0	gag	TTA	0	0	0	gag	TTA	0	0	0	gag	TTA	0	0	0	gag	TTA	0	0	0	gag	TTA	0	0	0	gag	TTA	0	0	0
gag	ACC	0	0	0	gag	AGC	0	0	0	gag	CCT	0	0	0	gag	AGC	0	0	0	gag	AGC	0	0	0	gag	AGC	0	0	0	gag	AGC	0	0	0	gag	AGT	0	0	0	gag	AGC	0	0	0	gag	AGC	0	0	0
gag	GGG	0	0	0	gag	GGG	0	0	0	gag	TTG	0	0	0	gag	GGG	0	0	0	gag	GGG	0	0	0	gag	GGG	0	0	0	gag	GGG	0	0	0	gag	GCG	0	0	0	gag	GGG	0	0	0	gag	GGG	0	0	0
gag	GGA	0	0	0	gag	GGA	0	0	0	gag	GAT	0	0	0	gag	GGA	0	0	0	gag	GGA	0	0	0	gag	GGA	0	0	0	gag	GGA	0	0	0	gag	GGG	0	0	0	gag	GGA	0	0	0	gag	GGA	0	0	0
gag	AAA	0	0	0	gag	GAA	0	0	0	gag	TCC	0	0	0	gag	GAA	0	0	0	gag	GAA	0	0	0	gag	GAA	0	0	0	gag	GAA	0	0	0	gag	GAA	0	0	0	gag	GAT	0	0	0	gag	GAA	0	0	0
gag	TTA	0	0	0	gag	TTA	0	0	0	gag	CTC	0	0	0	gag	TTA	0	0	0	gag	TTA	0	0	0	gag	TTG	0	0	0	gag	TTA	0	0	0	gag	TTA	0	0	0	gag	TTA	0	0	0	gag	TTA	0	0	0
gag	GAT	0	0	0	gag	GAT	0	0	0	gag	AGA	0	0	0	gag	GAT	0	0	0	gag	GAT	0	0	0	gag	GAT	0	0	0	gag	GAT	0	0	0	gag	GAT	0	0	0	gag	GAT	0	0	0	gag	GAT	0	0	0
gag	GAG	0	0	0	gag	AGG	0	0	0	gag	TCA	0	0	0	gag	AGA	0	0	0	gag	AGA	0	0	0	gag	AGG	0	0	0	gag	AGA	0	0	0	gag	AAA	0	0	0	gag	AGA	0	0	0	gag	AGA	0	0	0
gag	TGG	0	0	0	gag	TGG	1	2	0	gag	CTC	0	0	0	gag	TGG	1	2	0	gag	TGG	0	2	1	gag	TGG	0	3	2	gag	TGG	1	5	0	gag	TTG	1	0	0	gag	TGG	0	3	0	gag	TGG	3	5	1
gag	GAG	0	0	0	gag	GAA	0	0	0	gag	TTT	0	0	0	gag	GAA	0	0	0	gag	GAA	0	0	0	gag	GAA	0	0	0	gag	GAG	0	0	0	gag	GAA	0	0	0	gag	GAG	0	0	0	gag	GAA	0	0	0
gag	AAA	0	0	0	gag	AAA	0	0	0	gag	GGC	0	0	0	gag	AAA	0	0	0	gag	AAA	0	0	0	gag	AAA	0	0	0	gag	AAA	0	0	0	gag	AGA	0	0	0	gag	AAA	0	0	0	gag	AAA	0	0	0
gag	ATT	0	0	0	gag	ATT	0	0	0	gag	AGC	0	0	0	gag	ATT	0	0	0	gag	ATT	0	0	0	gag	ATT	0	0	0	gag	ATT	0	0	0	gag	ATT	0	0	0	gag	ATT	0	0	0	gag	ATT	0	0	0
gag	CGG	0	0	0	gag	CGG	0	0	0	gag	GAC	0	0	0	gag	CGG	0	0	0	gag	CGG	0	0	0	gag	CGG	0	0	0	gag	CGG	0	0	0	gag	CGG	0	0	0	gag	CGG	0	0	0	gag	CGG	0	0	0
gag	TTA	0	0	0	gag	TTA	0	0	0	gag	CCC	0	0	0	gag	TTG	0	0	0	gag	TTA	0	0	0	gag	TTA	0	0	0	gag	TTA	0	0	0	gag	TTA	0	0	0	gag	TTA	0	0	0	gag	TTA	0	0	0
gag	AGG	0	0	0	gag	AGG	0	0	0	gag	TCG	0	0	0	gag	AGG	0	0	0	gag	AGG	0	0	0	gag	AGG	0	0	0	gag	AGG	0	0	0	gag	AGG	0	0	0	gag	AGG	0	0	0	gag	CGG	0	0	0
gag	CCA	0	0	0	gag	CCA	0	0	0	gag	TCA	0	0	0	gag	CCA	0	0	0	gag	CCA	0	0	0	gag	CCA	0	0	0	gag	CCA	0	0	0	gag	CCA	0	0	0	gag	CCA	0	0	0	gag	CCA	0	0	0
gag	GGA	0	0	0	gag	GGG	0	0	0	gag	ACA	0	0	0	gag	GGG	0	0	0	gag	GGG	0	0	0	gag	GGA	0	0	0	gag	GGG	0	0	0	gag	GGG	0	0	0	gag	GGG	0	0	0	gag	GGG	0	0	0
gag	GGA	0	0	0	gag	GGC	0	0	0	gag	ATG	0	0	0	gag	GGA	0	0	0	gag	GGA	0	0	0	gag	GGA	0	0	0	gag	GGA	0	0	0	gag	GGA	0	0	0	gag	GGA	0	0	0	gag	GGA	0	0	0
gag	AAT	0	0	0	gag	AAG	0	0	0	gag	GGT	0	0	0	gag	CAT	0	0	0	gag	AGG	0	0	0	gag	AAG	0	0	0	gag	AAG	0	0	0	gag	AGC	0	0	0	gag	AAG	0	0	0	gag	AAG	0	0	0
gag	AAA	0	0	0	gag	AAA	0	0	0	gag	GCG	0	0	0	gag	AAA	0	0	0	gag	AAA	0	0	0	gag	AAA	0	0	0	gag	AAA	0	0	0	gag	AAA	0	0	0	gag	AAA	0	0	0	gag	AAA	0	0	0
gag	AAA	0	0	0	gag	CAA	0	0	0	gag	AGA	0	0	0	gag	AAA	0	0	0	gag	CAA	0	0	0	gag	CAA	0	0	0	gag	AAA	0	0	0	gag	AAA	0	0	0	gag	AAA	0	0	0	gag	AAA	0	0	0
gag	TAT	0	0	0	gag	TAT	0	0	0	gag	GCG	0	0	0	gag	TAT	0	0	0	gag	TAT	0	0	0	gag	TAT	0	0	0	gag	TAT	0	0	0	gag	TAC	0	0	0	gag	TAT	0	0	0	gag	TAT	0	0	0
gag	AGA	0	0	0	gag	AGA	0	0	0	gag	TCA	0	0	0	gag	AAA	0	0	0	gag	AAA	0	0	0	gag	AAA	0	0	0	gag	AGG	0	0	0	gag	AGA	0	0	0	gag	AAA	0	0	0	gag	AGA	0	0	0
gag	CTA	0	0	0	gag	TTA	0	0	0	gag	GTA	0	0	0	gag	TTA	0	0	0	gag	TTA	0	0	0	gag	CTA	0	0	0	gag	TTA	0	0	0	gag	TTA	0	0	0	gag	TTA	0	0	0	gag	TTA	0	0	0
gag	AAA	0	0	0	gag	AAA	0	0	0	gag	TTA	0	0	0	gag	AAA	0	0	0	gag	AAA	0	0	0	gag	AAA	0	0	0	gag	AAA	0	0	0	gag	AAA	0	0	0	gag	AAA	0	0	0	gag	AAA	0	0	0
gag	CAT	0	0	0	gag	CAT	0	0	0	gag	AGC	0	0	0	gag	CAT	0	0	0	gag	CAT	0	0	0	gag	CAT	0	0	0	gag	CAT	0	0	0	gag	CAT	0	0	0	gag	CAT	0	0	0	gag	CAT	0	0	0
gag	CTA	0	0	0	gag	ATA	0	0	0	gag	GGG	0	0	0	gag	ATA	0	0	0	gag	ATA	0	0	0	gag	ATA	0	0	0	gag	ATA	0	0	0	gag	ATA	0	0	0	gag	ATA	0	0	0	gag	GTA	0	0	0
gag	GTA	0	0	0	gag	GTA	0	0	0	gag	GGC	0	0	0	gag	ATA	0	0	0	gag	GTA	0	0	0	gag	GTA	0	0	0	gag	GTA	0	0	0	gag	GTA	0	0	0	gag	GTA	0	0	0	gag	GTA	0	0	0
gag	TGG	0	0	0	gag	TGG	0	0	0	gag	GAC	0	0	0	gag	TGG	0	2	0	gag	TGG	0	1	0	gag	TGG	0	1	0	gag	TGG	0	3	0	gag	TGG	0	0	0	gag	TGG	0	2	0	gag	TGG	1	5	0
gag	GCA	0	0	0	gag	GCA	0	0	0	gag	TTA	0	0	0	gag	GCA	0	0	0	gag	GCA	0	0	0	gag	GCA	0	0	0	gag	GCA	0	0	0	gag	ACA	0	0	0	gag	GCA	0	0	0	gag	GCA	0	0	0
gag	AGC	0	0	0	gag	AGC	0	0	0	gag	GAT	0	0	0	gag	AGC	0	0	0	gag	AGC	0	0	0	gag	AGC	0	0	0	gag	AGC	0	0	0	gag	AGC	0	0	0	gag	AGC	0	0	0	gag	AGC	0	0	0
gag	AGG	0	0	0	gag	AGG	0	0	0	gag	AAA	0	0	0	gag	AGG	0	0	0	gag	AGG	0	0	0	gag	AGG	0	0	0	gag	AGG	0	0	0	gag	AGG	0	0	0	gag	AGG	0	0	0	gag	AGG	0	0	0
gag	GAG	0	0	0	gag	GAG	0	0	0	gag	TGG	0	4	0	gag	GAG	0	0	0	gag	GAA	0	0	0	gag	GAG	0	0	0	gag	GAG	0	0	0	gag	GAG	0	0	0	gag	GAG	0	0	0	gag	GAG	0	0	0
gag	CTA	0	0	0	gag	CTA	0	0	0	gag	GAA	0	0	0	gag	CTA	0	0	0	gag	CTA	0	0	0	gag	CTA	0	0	0	gag	CTA	0	0	0	gag	CTA	0	0	0	gag	CTA	0	0	0	gag	CTA	0	0	0
gag	GAA	0	0	0	gag	GAA	0	0	0	gag	AAA	0	0	0	gag	GAA	0	0	0	gag	GAA	0	0	0	gag	GAA	0	0	0	gag	GAA	0	0	0	gag	GAA	0	0	0	gag	GAA	0	0	0	gag	GAA	0	0	0
gag	CGA	0	0	0	gag	CGA	0	0	0	gag	ATT	0	0	0	gag	CGA	0	0	0	gag	CGA	0	0	0	gag	CGA	0	0	0	gag	CGA	0	0	0	gag	CGA	0	0	0	gag	CGA	0	0	0	gag	CGA	0	0	0
gag	TTT	0	0	0	gag	TTC	0	0	0	gag	CGG	0	0	0	gag	TTC	0	0	0	gag	TTT	0	0	0	gag	TTC	0	0	0	gag	TTC	0	0	0	gag	TTC	0	0	0	gag	TTC	0	0	0	gag	TTC	0	0	0
gag	GCA	0	0	0	gag	GCA	0	0	0	gag	TTA	0	0	0	gag	GCA	0	0	0	gag	GCA	0	0	0	gag	GCA	0	0	0	gag	GCA	0	0	0	gag	GCA	0	0	0	gag	GCA	0	0	0	gag	GCA	0	0	0
gag	GTT	0	0	0	gag	GTT	0	0	0	gag	AGG	0	0	0	gag	GTT	0	0	0	gag	GTT	0	0	0	gag	GTT	0	0	0	gag	GTC	0	0	0	gag	GTT	0	0	0	gag	GTT	0	0	0	gag	GTC	0	0	0
gag	AAT	0	0	0	gag	AAC	0	0	0	gag	CCA	0	0	0	gag	AAT	0	0	0	gag	AAT	0	0	0	gag	AAT	0	0	0	gag	AAT	0	0	0	gag	AAT	0	0	0	gag	AAC	0	0	0	gag	AAT	0	0	0
gag	CCT	0	0	0	gag	CCT	0	0	0	gag	GGG	0	0	0	gag	CCT	0	0	0	gag	CCT	0	0	0	gag	CCT	0	0	0	gag	CCT	0	0	0	gag	CCT	0	0	0	gag	CCC	0	0	0	gag	CCT	0	0	0
gag	GGC	0	0	0	gag	GGC	0	0	0	gag	GGA	0	0	0	gag	GGC	0	0	0	gag	GGA	0	0	0	gag	GGC	0	0	0	gag	GGC	0	0	0	gag	GGC	0	0	0	gag	AGC	0	0	0	gag	GGC	0	0	0
gag	CTG	0	0	0	gag	CTG	0	0	0	gag	AAG	0	0	0	gag	CTG	0	0	0	gag	CTG	0	0	0	gag	CTG	0	0	0	gag	CTT	0	0	0	gag	CTC	0	0	0	gag	CTG	0	0	0	gag	CTA	0	0	0
gag	TTA	0	0	0	gag	TTA	0	0	0	gag	AAA	0	0	0	gag	TTA	0	0	0	gag	TTA	0	0	0	gag	TTA	0	0	0	gag	TTG	0	0	0	gag	TTA	0	0	0	gag	TTA	0	0	0	gag	TTA	0	0	0
gag	GAA	0	0	0	gag	GAA	0	0	0	gag	AAA	0	0	0	gag	GAA	0	0	0	gag	GAA	0	0	0	gag	GAA	0	0	0	gag	GAG	0	0	0	gag	GAA	0	0	0	gag	GAA	0	0	0	gag	GAA	0	0	0
gag	ACA	0	0	0	gag	ACA	0	0	0	gag	TAT	0	0	0	gag	ACA	0	0	0	gag	ACA	0	0	0	gag	ACA	0	0	0	gag	ACA	0	0	0	gag	ACA	0	0	0	gag	ACA	0	0	0	gag	TCA	0	0	0
gag	GCA	0	0	0	gag	TCA	0	0	0	gag	AAA	0	0	0	gag	GCA	0	0	0	gag	GCA	0	0	0	gag	TCA	0	0	0	gag	TCA	0	0	0	gag	GCA	0	0	0	gag	TCA	0	0	0	gag	TCA	0	0	0
gag	GAA	0	0	0	gag	GAA	0	0	0	gag	TTA	0	0	0	gag	GAA	0	0	0	gag	GAA	0	0	0	gag	GAA	0	0	0	gag	GAA	0	0	0	gag	GAG	0	0	0	gag	GAA	0	0	0	gag	GAA	0	0	0
gag	GGC	0	0	0	gag	GGC	0	0	0	gag	AAA	0	0	0	gag	GGC	0	0	0	gag	GGC	0	0	0	gag	GGC	0	0	0	gag	GGC	0	0	0	gag	GGC	0	0	0	gag	GGC	0	0	0	gag	GGC	0	0	0
gag	TGT	0	0	0	gag	TGT	0	0	0	gag	CAT	0	0	0	gag	TGT	0	0	0	gag	TGT	0	0	0	gag	TGT	0	0	0	gag	TGC	0	0	0	gag	TGT	0	0	0	gag	TGT	0	0	0	gag	TGT	0	0	0
gag	AGA	0	0	0	gag	AAA	0	0	0	gag	ATA	0	0	0	gag	AGA	0	0	0	gag	AGA	0	0	0	gag	AGA	0	0	0	gag	AGA	0	0	0	gag	AGA	0	0	0	gag	AGA	0	0	0	gag	AGA	0	0	0
gag	CAA	0	0	0	gag	CAA	0	0	0	gag	GTA	0	0	0	gag	CAA	0	0	0	gag	CAA	0	0	0	gag	CAA	0	0	0	gag	CAA	0	0	0	gag	CAA	0	0	0	gag	CAA	0	0	0	gag	CAA	0	0	0
gag	ATA	0	0	0	gag	ATA	0	0	0	gag	TGG	0	1	0	gag	ATA	0	0	0	gag	ATA	0	0	0	gag	ATA	0	0	0	gag	ATA	0	0	0	gag	ATA	0	0	0	gag	ATA	0	0	0	gag	ATA	0	0	0
gag	CTG	0	0	0	gag	ATA	0	0	0	gag	GCA	0	0	0	gag	CTG	0	0	0	gag	ATG	0	0	0	gag	CTG	0	0	0	gag	CTG	0	0	0	gag	TTG	0	0	0	gag	CTG	0	0	0	gag	CTA	0	0	0
gag	GGG	0	0	0	gag	CAA	0	0	0	gag	AGC	0	0	0	gag	AGA	0	0	0	gag	GGA	0	0	0	gag	GGA	0	0	0	gag	GGA	0	0	0	gag	GAA	0	0	0	gag	AGA	0	0	0	gag	GAA	0	0	0
gag	CAG	0	0	0	gag	CAG	0	0	0	gag	AGG	0	0	0	gag	CAG	0	0	0	gag	CAA	0	0	0	gag	CAG	0	0	0	gag	CAG	0	0	0	gag	CAG	0	0	0	gag	CAG	0	0	0	gag	CAG	0	0	0
gag	TTA	0	0	0	gag	CTA	0	0	0	gag	GAG	0	0	0	gag	TTA	0	0	0	gag	TTA	0	0	0	gag	TTA	0	0	0	gag	TTA	0	0	0	gag	CTA	0	0	0	gag	CTA	0	0	0	gag	CTA	0	0	0
gag	CAA	0	0	0	gag	CAA	0	0	0	gag	TTA	0	0	0	gag	CAA	0	0	0	gag	CAC	0	0	0	gag	CAA	0	0	0	gag	CAA	0	0	0	gag	CAA	0	0	0	gag	CAA	0	0	0	gag	CAA	0	0	0
gag	CCA	0	0	0	gag	CCA	0	0	0	gag	GAA	0	0	0	gag	CCA	0	0	0	gag	CCA	0	0	0	gag	CCA	0	0	0	gag	CCG	0	0	0	gag	CCA	0	0	0	gag	CCA	0	0	0	gag	CCT	0	0	0
gag	GCC	0	0	0	gag	TCC	0	0	0	gag	CGA	0	0	0	gag	TCC	0	0	0	gag	TCC	0	0	0	gag	GCC	0	0	0	gag	TCC	0	0	0	gag	ACC	0	0	0	gag	TCC	0	0	0	gag	TCT	0	0	0
gag	CTT	0	0	0	gag	CTT	0	0	0	gag	TTT	0	0	0	gag	CTT	0	0	0	gag	CTT	0	0	0	gag	CTT	0	0	0	gag	CTT	0	0	0	gag	CTT	0	0	0	gag	CTT	0	0	0	gag	CTT	0	0	0
gag	CAG	0	0	0	gag	CAG	0	0	0	gag	GCA	0	0	0	gag	GAG	0	0	0	gag	CAA	0	0	0	gag	CAG	0	0	0	gag	CAG	0	0	0	gag	CCA	0	0	0	gag	CAG	0	0	0	gag	CAG	0	0	0
gag	ACA	0	0	0	gag	ACA	0	0	0	gag	GTC	0	0	0	gag	ACA	0	0	0	gag	ACA	0	0	0	gag	ACA	0	0	0	gag	ACA	0	0	0	gag	ACA	0	0	0	gag	ACA	0	0	0	gag	ACA	0	0	0
gag	GGA	0	0	0	gag	GGA	0	0	0	gag	AAT	0	0	0	gag	GGA	0	0	0	gag	GGA	0	0	0	gag	GGA	0	0	0	gag	GGA	0	0	0	gag	GGA	0	0	0	gag	GGA	0	0	0	gag	GGA	0	0	0
gag	TCA	0	0	0	gag	TCA	0	0	0	gag	CCT	0	0	0	gag	TCA	0	0	0	gag	TCA	0	0	0	gag	TCA	0	0	0	gag	TCA	0	0	0	gag	TCA	0	0	0	gag	TCA	0	0	0	gag	TCA	0	0	0
gag	GAA	0	0	0	gag	GAA	0	0	0	gag	GGC	0	0	0	gag	GAA	0	0	0	gag	GAA	0	0	0	gag	GAA	0	0	0	gag	GAA	0	0	0	gag	GAA	0	0	0	gag	GAA	0	0	0	gag	GAA	0	0	0
gag	GAA	0	0	0	gag	GAA	0	0	0	gag	CTG	0	0	0	gag	GAA	0	0	0	gag	GAA	0	0	0	gag	GAA	0	0	0	gag	GAA	0	0	0	gag	GAA	0	0	0	gag	GAA	0	0	0	gag	GAA	0	0	0
gag	CTT	0	0	0	gag	CTT	0	0	0	gag	TTA	0	0	0	gag	CTT	0	0	0	gag	CTC	0	0	0	gag	CTT	0	0	0	gag	CTT	0	0	0	gag	ATT	0	0	0	gag	CTT	0	0	0	gag	CTT	0	0	0
gag	AAA	0	0	0	gag	AGA	0	0	0	gag	GAA	0	0	0	gag	AAA	0	0	0	gag	AAA	0	0	0	gag	AAA	0	0	0	gag	AGA	0	0	0	gag	AGA	0	0	0	gag	AAA	0	0	0	gag	AGA	0	0	0
gag	TCA	0	0	0	gag	TCA	0	0	0	gag	ACA	0	0	0	gag	TCA	0	0	0	gag	TCA	0	0	0	gag	TCA	0	0	0	gag	TCA	0	0	0	gag	TCA	0	0	0	gag	TCA	0	0	0	gag	TCA	0	0	0
gag	TTA	0	0	0	gag	TTA	0	0	0	gag	TCA	0	0	0	gag	TTA	0	0	0	gag	CTA	0	0	0	gag	TTA	0	0	0	gag	CTA	0	0	0	gag	GTA	0	0	0	gag	TTA	0	0	0	gag	TTA	0	0	0
gag	TAT	0	0	0	gag	TAT	0	0	0	gag	GGA	0	0	0	gag	TTT	0	0	0	gag	TAT	0	0	0	gag	TAT	0	0	0	gag	TAT	0	0	0	gag	TTT	0	0	0	gag	TAT	0	0	0	gag	TAT	0	0	0
gag	AAT	0	0	0	gag	AAT	0	0	0	gag	GGC	0	0	0	gag	AAT	0	0	0	gag	AAT	0	0	0	gag	AAT	0	0	0	gag	AAT	0	0	0	gag	AAT	0	0	0	gag	AAT	0	0	0	gag	AAT	0	0	0
gag	ACA	0	0	0	gag	ACA	0	0	0	gag	TGT	0	0	0	gag	ACA	0	0	0	gag	ACA	0	0	0	gag	ACA	0	0	0	gag	ACA	0	0	0	gag	ACC	0	0	0	gag	ACA	0	0	0	gag	ACA	0	0	0
gag	GTA	0	0	0	gag	GTA	0	0	0	gag	AAA	0	0	0	gag	ATA	0	0	0	gag	GTA	0	0	0	gag	GTA	0	0	0	gag	GTA	0	0	0	gag	GTA	0	0	0	gag	GTA	0	0	0	gag	ATA	0	0	0
gag	GCA	0	0	0	gag	GCA	0	0	0	gag	CAG	0	0	0	gag	GCA	0	0	0	gag	GCA	0	0	0	gag	GCA	0	0	0	gag	GCA	0	0	0	gag	GCT	0	0	0	gag	GCA	0	0	0	gag	GCA	0	0	0
gag	ACC	0	0	0	gag	ACA	0	0	0	gag	ATA	0	0	0	gag	GTC	0	0	0	gag	GTC	0	0	0	gag	GTC	0	0	0	gag	ACC	0	0	0	gag	GTC	0	0	0	gag	ACC	0	0	0	gag	ACC	0	0	0
gag	CTC	0	0	0	gag	CTC	0	0	0	gag	CTG	0	0	0	gag	CTC	0	0	0	gag	CTC	0	0	0	gag	CTC	0	0	0	gag	CTC	0	0	0	gag	ATC	0	0	0	gag	CTC	0	0	0	gag	CTC	0	0	0
gag	TAT	0	0	0	gag	TAT	0	0	0	gag	GGA	0	0	0	gag	TAT	0	0	0	gag	TAT	0	0	0	gag	TAT	0	0	0	gag	TAT	0	0	0	gag	TAT	0	0	0	gag	TAT	0	0	0	gag	TAT	0	0	0
gag	TGT	0	0	0	gag	TGT	0	0	0	gag	CAG	0	0	0	gag	TGT	0	0	0	gag	TGT	0	0	0	gag	TGT	0	0	0	gag	TGT	0	0	0	gag	TGT	0	0	0	gag	TGT	0	0	0	gag	TGT	0	0	0
gag	GTA	0	0	0	gag	GTG	0	0	0	gag	CTA	0	0	0	gag	GTG	0	0	0	gag	GTA	0	0	0	gag	GTA	0	0	0	gag	GTA	0	0	0	gag	GTG	0	0	0	gag	GTG	0	0	0	gag	GTG	0	0	0
gag	CAT	0	0	0	gag	CAT	0	0	0	gag	CAA	0	0	0	gag	CAT	0	0	0	gag	CAT	0	0	0	gag	CAT	0	0	0	gag	CAT	0	0	0	gag	CAT	0	0	0	gag	CAG	0	0	0	gag	CAT	0	0	0
gag	CAA	0	0	0	gag	CAA	0	0	0	gag	CCG	0	0	0	gag	CAA	0	0	0	gag	CAA	0	0	0	gag	CAA	0	0	0	gag	CAA	0	0	0	gag	AGC	0	0	0	gag	CAA	0	0	0	gag	CGA	0	0	0
gag	AAG	0	0	0	gag	AGG	0	0	0	gag	TCC	0	0	0	gag	AGG	0	0	0	gag	AAG	0	0	0	gag	AGG	0	0	0	gag	AAG	0	0	0	gag	AAG	0	0	0	gag	AGG	0	0	0	gag	AAG	0	0	0
gag	ATA	0	0	0	gag	ATA	0	0	0	gag	CTT	0	0	0	gag	ATA	0	0	0	gag	ATA	0	0	0	gag	ATA	0	0	0	gag	ATA	0	0	0	gag	ATA	0	0	0	gag	ATA	0	0	0	gag	ATA	0	0	0
gag	GAG	0	0	0	gag	AAG	0	0	0	gag	CAG	0	0	0	gag	GAG	0	0	0	gag	GAG	0	0	0	gag	GAT	0	0	0	gag	GAT	0	0	0	gag	GAG	0	0	0	gag	GAT	0	0	0	gag	GAT	0	0	0
gag	ATA	0	0	0	gag	GTA	0	0	0	gag	ACA	0	0	0	gag	GTA	0	0	0	gag	GTA	0	0	0	gag	ATA	0	0	0	gag	GTA	0	0	0	gag	GTA	0	0	0	gag	GTA	0	0	0	gag	GTA	0	0	0
gag	AAA	0	0	0	gag	GCA	0	0	0	gag	GGA	0	0	0	gag	AAG	0	0	0	gag	AGA	0	0	0	gag	AAA	0	0	0	gag	AAA	0	0	0	gag	AGA	0	0	0	gag	AAA	0	0	0	gag	CAA	0	0	0
gag	GAC	0	0	0	gag	GAC	0	0	0	gag	TCA	0	0	0	gag	GAC	0	0	0	gag	GAC	0	0	0	gag	GAC	0	0	0	gag	GAC	0	0	0	gag	GAC	0	0	0	gag	GAC	0	0	0	gag	GAC	0	0	0
gag	ACC	0	0	0	gag	ACC	0	0	0	gag	GAA	0	0	0	gag	ACC	0	0	0	gag	ACC	0	0	0	gag	ACC	0	0	0	gag	ACC	0	0	0	gag	ACC	0	0	0	gag	ACC	0	0	0	gag	ACC	0	0	0
gag	AAG	0	0	0	gag	AAG	0	0	0	gag	GAA	0	0	0	gag	AAG	0	0	0	gag	AAG	0	0	0	gag	AAG	0	0	0	gag	AAG	0	0	0	gag	AAA	0	0	0	gag	AAG	0	0	0	gag	AAG	0	0	0
gag	GAA	0	0	0	gag	GAA	0	0	0	gag	CTT	0	0	0	gag	GAA	0	0	0	gag	GAA	0	0	0	gag	GAA	0	0	0	gag	GAA	0	0	0	gag	GAA	0	0	0	gag	GAA	0	0	0	gag	GAA	0	0	0
gag	GCT	0	0	0	gag	GCT	0	0	0	gag	AAA	0	0	0	gag	GCT	0	0	0	gag	GCC	0	0	0	gag	GCT	0	0	0	gag	GCT	0	0	0	gag	GCT	0	0	0	gag	GCT	0	0	0	gag	GCT	0	0	0
gag	TTA	0	0	0	gag	TTA	0	0	0	gag	TCA	0	0	0	gag	TTA	0	0	0	gag	TTA	0	0	0	gag	TTA	0	0	0	gag	TTA	0	0	0	gag	TTA	0	0	0	gag	TTA	0	0	0	gag	TTA	0	0	0
gag	GAT	0	0	0	gag	GAG	0	0	0	gag	TTA	0	0	0	gag	GAG	0	0	0	gag	GAT	0	0	0	gag	GAT	0	0	0	gag	GAC	0	0	0	gag	GAG	0	0	0	gag	GAC	0	0	0	gag	GAT	0	0	0
gag	AGG	0	0	0	gag	AAG	0	0	0	gag	TAT	0	0	0	gag	AAG	0	0	0	gag	AGG	0	0	0	gag	AAG	0	0	0	gag	AAG	0	0	0	gag	AAG	0	0	0	gag	AAG	0	0	0	gag	AAG	0	0	0
gag	ATA	0	0	0	gag	ATA	0	0	0	gag	AAT	0	0	0	gag	ATA	0	0	0	gag	GTA	0	0	0	gag	ATA	0	0	0	gag	GTA	0	0	0	gag	GTA	0	0	0	gag	ATA	0	0	0	gag	GTA	0	0	0
gag	GAG	0	0	0	gag	GAG	0	0	0	gag	ACA	0	0	0	gag	GAG	0	0	0	gag	GAG	0	0	0	gag	GAG	0	0	0	gag	GAG	0	0	0	gag	GAG	0	0	0	gag	GAG	0	0	0	gag	GAG	0	0	0
gag	GAA	0	0	0	gag	GAA	0	0	0	gag	GTA	0	0	0	gag	GAA	0	0	0	gag	GAA	0	0	0	gag	GAA	0	0	0	gag	GAA	0	0	0	gag	GAA	0	0	0	gag	GAA	0	0	0	gag	GAA	0	0	0
gag	GAA	0	0	0	gag	GAG	0	0	0	gag	GCA	0	0	0	gag	GAG	0	0	0	gag	GAG	0	0	0	gag	GAG	0	0	0	gag	GAG	0	0	0	gag	GAA	0	0	0	gag	GTA	0	0	0	gag	GAG	0	0	0
gag	CAA	0	0	0	gag	CAA	0	0	0	gag	GTC	0	0	0	gag	CAA	0	0	0	gag	CAA	0	0	0	gag	CAG	0	0	0	gag	CAA	0	0	0	gag	CAA	0	0	0	gag	CAA	0	0	0	gag	CAA	0	0	0
gag	AAC	0	0	0	gag	AAC	0	0	0	gag	CTC	0	0	0	gag	AAC	0	0	0	gag	AAC	0	0	0	gag	AAT	0	0	0	gag	AAC	0	0	0	gag	AAC	0	0	0	gag	AAC	0	0	0	gag	AAC	0	0	0
gag	AAA	0	0	0	gag	AAA	0	0	0	gag	TAT	0	0	0	gag	AAA	0	0	0	gag	AAA	0	0	0	gag	AAG	0	0	0	gag	AAA	0	0	0	gag	AAA	0	0	0	gag	AAA	0	0	0	gag	AAA	0	0	0
gag	TGC	0	0	0	gag	AGT	0	0	0	gag	TGT	0	0	0	gag	AGT	0	0	0	gag	TGT	0	0	0	gag	CAG	0	0	0	gag	AGC	0	0	0	gag	AGT	0	0	0	gag	AGT	0	0	0	gag	AGT	0	0	0
gag	AAG	0	0	0	gag	AAG	0	0	0	gag	GTA	0	0	0	gag	AAG	0	0	0	gag	AAG	0	0	0	gag	AAC	0	0	0	gag	AAG	0	0	0	gag	AAG	0	0	0	gag	AAG	0	0	0	gag	AAG	0	0	0
gag	AAA	0	0	0	gag	AAA	0	0	0	gag	CAT	0	0	0	gag	GCA	0	0	0	gag	AAA	0	0	0	gag	AAG	0	0	0	gag	AAA	0	0	0	gag	AAA	0	0	0	gag	GAA	0	0	0	gag	AAA	0	0	0
gag	AGG	0	0	0	gag	AAG	0	0	0	gag	CAA	0	0	0	gag	AAA	0	0	0	gag	AAA	0	0	0	gag	AAA	0	0	0	gag	AGG	0	0	0	gag	AAG	0	0	0	gag	AAG	0	0	0	gag	AAA	0	0	0
gag	GCA	0	0	0	gag	GCA	0	0	0	gag	AGG	0	0	0	gag	GCA	0	0	0	gag	GCA	0	0	0	gag	AAG	0	0	0	gag	GCA	0	0	0	gag	ACA	0	0	0	gag	GCA	0	0	0	gag	GCA	0	0	0
gag	CAG	0	0	0	gag	CAA	0	0	0	gag	ATA	0	0	0	gag	CAG	0	0	0	gag	GAG	0	0	0	gag	GCA	0	0	0	gag	CAG	0	0	0	gag	CAG	0	0	0	gag	CAG	0	0	0	gag	CAG	0	0	0
gag	CAA	0	0	0	gag	CAA	0	0	0	gag	GAT	0	0	0	gag	CAA	0	0	0	gag	CAA	0	0	0	gag	CAG	0	0	0	gag	CAA	0	0	0	gag	CAA	0	0	0	gag	CAA	0	0	0	gag	CAA	0	0	0
gag	GCA	0	0	0	gag	GCA	0	0	0	gag	GTA	0	0	0	gag	GCA	0	0	0	gag	GCA	0	0	0	gag	CAA	0	0	0	gag	GCT	0	0	0	gag	GCA	0	0	0	gag	GCA	0	0	0	gag	GCA	0	0	0
gag	GCA	0	0	0	gag	GTA	0	0	0	gag	GCA	0	0	0	gag	GCA	0	0	0	gag	GCG	0	0	0	gag	GCA	0	0	0	gag	GCA	0	0	0	gag	GCA	0	0	0	gag	GCA	0	0	0	gag	GCA	0	0	0
gag	GCA	0	0	0	gag	GCT	0	0	0	gag	GAC	0	0	0	gag	ACT	0	0	0	gag	GCT	0	0	0	gag	GCA	0	0	0	gag	GCT	0	0	0	gag	GCT	0	0	0	gag	GCT	0	0	0	gag	GCT	0	0	0
gag	GCT	0	0	0	gag	GAC	0	0	0	gag	ACC	0	0	0	gag	GAC	0	0	0	gag	GCC	0	0	0	gag	GCA	0	0	0	gag	GGC	0	0	0	gag	AAC	0	0	0	gag	GAC	0	0	0	gag	GCT	0	0	0
gag	GCT	0	0	0	gag	ACA	0	0	0	gag	AAG	0	0	0	gag	ACA	0	0	0	gag	ACA	0	0	0	gag	GCT	0	0	0	gag	ACA	0	0	0	gag	ACA	0	0	0	gag	ACA	0	0	0	gag	AAC	0	0	0
gag	GAC	0	0	0	gag	GGA	0	0	0	gag	GAA	0	0	0	gag	GGA	0	0	0	gag	GGA	0	0	0	gag	GAC	0	0	0	gag	GGA	0	0	0	gag	GGA	0	0	0	gag	GGA	0	0	0	gag	ACG	0	0	0
gag	GCA	0	0	0	gag	AAC	0	0	0	gag	GCT	0	0	0	gag	AAC	0	0	0	gag	AGC	0	0	0	gag	GCA	0	0	0	gag	AAC	0	0	0	gag	AAC	0	0	0	gag	AAC	0	0	0	gag	GGA	0	0	0
gag	GGA	0	0	0	gag	AGC	0	0	0	gag	TTA	0	0	0	gag	AGC	0	0	0	gag	AGC	0	0	0	gag	GGA	0	0	0	gag	AGC	0	0	0	gag	AGC	0	0	0	gag	AGC	0	0	0	gag	AGC	0	0	0
gag	AGC	0	0	0	gag	AGC	0	0	0	gag	GAA	0	0	0	gag	AAA	0	0	0	gag	AGT	0	0	0	gag	ACC	0	0	0	gag	AAC	0	0	0	gag	AGC	0	0	0	gag	AGC	0	0	0	gag	AGC	0	0	0
gag	AGC	0	0	0	gag	AAG	0	0	0	gag	AAG	0	0	0	gag	CAG	0	0	0	gag	CAG	0	0	0	gag	AGC	0	0	0	gag	CAG	0	0	0	gag	CAG	0	0	0	gag	CAG	0	0	0	gag	AGT	0	0	0
gag	AGC	0	0	0	gag	GAC	0	0	0	gag	ATA	0	0	0	gag	GTC	0	0	0	gag	GTC	0	0	0	gag	AAC	0	0	0	gag	GTC	0	0	0	gag	GTC	0	0	0	gag	GTC	0	0	0	gag	CAG	0	0	0
gag	CAG	0	0	0	gag	AGC	0	0	0	gag	GAG	0	0	0	gag	AGT	0	0	0	gag	AGC	0	0	0	gag	CAG	0	0	0	gag	AGC	0	0	0	gag	AGC	0	0	0	gag	AAC	0	0	0	gag	ACC	0	0	0
gag	GCC	0	0	0	gag	CAG	0	0	0	gag	GAA	0	0	0	gag	CAA	0	0	0	gag	CAG	0	0	0	gag	GTC	0	0	0	gag	GTC	0	0	0	gag	CAC	0	0	0	gag	AAC	0	0	0	gag	AGT	0	0	0
gag	AGC	0	0	0	gag	GTC	0	0	0	gag	GAG	0	0	0	gag	AAT	0	0	0	gag	AAT	0	0	0	gag	AGC	0	0	0	gag	AGC	0	0	0	gag	AAT	0	0	0	gag	AGC	0	0	0	gag	CAA	0	0	0
gag	CAA	0	0	0	gag	AGC	0	0	0	gag	CAA	0	0	0	gag	TAC	0	0	0	gag	TAC	0	0	0	gag	CAA	0	0	0	gag	CAA	0	0	0	gag	TTT	0	0	0	gag	CAG	0	0	0	gag	AAT	0	0	0
gag	AAT	0	0	0	gag	CAA	0	0	0	gag	AAT	0	0	0	gag	CCT	0	0	0	gag	CCT	0	0	0	gag	AAT	0	0	0	gag	AAT	0	0	0	gag	CCT	0	0	0	gag	GTT	0	0	0	gag	TAC	0	0	0
gag	TAC	0	0	0	gag	AAT	0	0	0	gag	AAA	0	0	0	gag	ATA	0	0	0	gag	ATA	0	0	0	gag	TAC	0	0	0	gag	TAC	0	0	0	gag	ATA	0	0	0	gag	AGC	0	0	0	gag	CCT	0	0	0
gag	CCT	0	0	0	gag	TAC	0	0	0	gag	AGT	0	0	0	gag	GTG	0	0	0	gag	GTA	0	0	0	gag	CCT	0	0	0	gag	CCT	0	0	0	gag	GTG	0	0	0	gag	CAA	0	0	0	gag	ATA	0	0	0
gag	ATA	0	0	0	gag	CCT	0	0	0	gag	AAA	0	0	0	gag	CAG	0	0	0	gag	CAG	0	0	0	gag	ATA	0	0	0	gag	ATA	0	0	0	gag	CAG	0	0	0	gag	GTC	0	0	0	gag	GTG	0	0	0
gag	GTA	0	0	0	gag	ATA	0	0	0	gag	GAA	0	0	0	gag	AAC	0	0	0	gag	AAC	0	0	0	gag	GTG	0	0	0	gag	GTG	0	0	0	gag	AAC	0	0	0	gag	AGC	0	0	0	gag	CAG	0	0	0
gag	CAA	0	0	0	gag	GTA	0	0	0	gag	AAA	0	0	0	gag	CTG	0	0	0	gag	CTT	0	0	0	gag	CAG	0	0	0	gag	CAG	0	0	0	gag	ATA	0	0	0	gag	CAA	0	0	0	gag	AAC	0	0	0
gag	AAC	0	0	0	gag	CAG	0	0	0	gag	GCA	0	0	0	gag	CAG	0	0	0	gag	CAG	0	0	0	gag	AAC	0	0	0	gag	AAC	0	0	0	gag	CAG	0	0	0	gag	AAT	0	0	0	gag	ATT	0	0	0
gag	CTA	0	0	0	gag	AAC	0	0	0	gag	CAG	0	0	0	gag	GGG	0	0	0	gag	GGG	0	0	0	gag	CAT	0	0	0	gag	CTT	0	0	0	gag	GGG	0	0	0	gag	TAC	0	0	0	gag	CAG	0	0	0
gag	CAG	0	0	0	gag	CTT	0	0	0	gag	CAA	0	0	0	gag	CAA	0	0	0	gag	CAA	0	0	0	gag	CAG	0	0	0	gag	CAG	0	0	0	gag	CAA	0	0	0	gag	CCT	0	0	0	gag	GGG	0	0	0
gag	GGG	0	0	0	gag	CAG	0	0	0	gag	GCA	0	0	0	gag	ATG	0	0	0	gag	ATG	0	0	0	gag	GGG	0	0	0	gag	GGG	0	0	0	gag	ATG	0	0	0	gag	ATA	0	0	0	gag	CAA	0	0	0
gag	CAA	0	0	0	gag	GGG	0	0	0	gag	GCA	0	0	0	gag	GTA	0	0	0	gag	GTA	0	0	0	gag	CAA	0	0	0	gag	CAA	0	0	0	gag	GTA	0	0	0	gag	GTG	0	0	0	gag	ATG	0	0	0
gag	ATG	0	0	0	gag	CAA	0	0	0	gag	AAG	0	0	0	gag	CAT	0	0	0	gag	CAT	0	0	0	gag	ATG	0	0	0	gag	ATG	0	0	0	gag	CAT	0	0	0	gag	CAG	0	0	0	gag	GTA	0	0	0
gag	GTA	0	0	0	gag	ATG	0	0	0	gag	CAA	0	0	0	gag	CAG	0	0	0	gag	CAG	0	0	0	gag	GTA	0	0	0	gag	GTA	0	0	0	gag	CAG	0	0	0	gag	AAT	0	0	0	gag	CAT	0	0	0
gag	CAT	0	0	0	gag	GTA	0	0	0	gag	GCA	0	0	0	gag	GCC	0	0	0	gag	GCC	0	0	0	gag	CAT	0	0	0	gag	CAT	0	0	0	gag	GCC	0	0	0	gag	CTC	0	0	0	gag	CAG	0	0	0
gag	CAG	0	0	0	gag	CAT	0	0	0	gag	GCA	0	0	0	gag	ATA	0	0	0	gag	CTA	0	0	0	gag	CAA	0	0	0	gag	CAG	0	0	0	gag	ATA	0	0	0	gag	CAG	0	0	0	gag	GCA	0	0	0
gag	GCC	0	0	0	gag	CAG	0	0	0	gag	GCT	0	0	0	gag	TCA	0	0	0	gag	TCA	0	0	0	gag	GCC	0	0	0	gag	GCC	0	0	0	gag	TCA	0	0	0	gag	GGA	0	0	0	gag	ATA	0	0	0
gag	ATA	0	0	0	gag	GCC	0	0	0	gag	AAC	0	0	0	gag	CCT	0	0	0	gag	CCT	0	0	0	gag	CTA	0	0	0	gag	ATA	0	0	0	gag	CCT	0	0	0	gag	CAA	0	0	0	gag	TCA	0	0	0
gag	TCA	0	0	0	gag	ATA	0	0	0	gag	ACA	0	0	0	gag	AGA	0	0	0	gag	AGA	0	0	0	gag	TCA	0	0	0	gag	TCA	0	0	0	gag	AGA	0	0	0	gag	ATG	0	0	0	gag	CCT	0	0	0
gag	CCT	0	0	0	gag	TCA	0	0	0	gag	GGA	0	0	0	gag	ACT	0	0	0	gag	ACT	0	0	0	gag	CCT	0	0	0	gag	CCT	0	0	0	gag	ACT	0	0	0	gag	GTA	0	0	0	gag	AGA	0	0	0
gag	AGA	0	0	0	gag	CCT	0	0	0	gag	AAT	0	0	0	gag	TTA	0	0	0	gag	TTA	0	0	0	gag	AGA	0	0	0	gag	AGA	0	0	0	gag	TTA	0	0	0	gag	CAT	0	0	0	gag	ACT	0	0	0
gag	ACT	0	0	0	gag	AGA	0	0	0	gag	AAC	0	0	0	gag	AAT	0	0	0	gag	AAT	0	0	0	gag	ACT	0	0	0	gag	ACT	0	0	0	gag	AAT	0	0	0	gag	CAG	0	0	0	gag	TTA	0	0	0
gag	TTA	0	0	0	gag	ACT	0	0	0	gag	AGC	0	0	0	gag	GCA	0	0	0	gag	GCA	0	0	0	gag	TTA	0	0	0	gag	TTA	0	0	0	gag	GCA	0	0	0	gag	GCC	0	0	0	gag	AAT	0	0	0
gag	AAT	0	0	0	gag	CTA	0	0	0	gag	AAC	0	0	0	gag	TGG	0	3	0	gag	TGG	0	4	1	gag	AAT	0	0	0	gag	AAT	0	0	0	gag	TGG	1	3	0	gag	ATA	0	0	0	gag	GCA	0	0	0
gag	GCA	0	0	0	gag	AAT	0	0	0	gag	GTC	0	0	0	gag	GTA	0	0	0	gag	GTA	0	0	0	gag	GCA	0	0	0	gag	GCA	0	0	0	gag	GTA	0	0	0	gag	GCA	0	0	0	gag	TGG	0	8	0
gag	TGG	0	0	0	gag	GCA	0	0	0	gag	AGC	0	0	0	gag	AAA	0	0	0	gag	AAA	0	0	0	gag	TGG	0	5	0	gag	TGG	1	7	0	gag	AAA	0	0	0	gag	CCT	0	0	0	gag	GTA	0	0	0
gag	GTA	0	0	0	gag	TGG	1	1	0	gag	CAG	0	0	0	gag	GTA	0	0	0	gag	GTA	0	0	0	gag	GTA	0	0	0	gag	GTA	0	0	0	gag	GTA	0	0	0	gag	AGA	0	0	0	gag	AAA	0	0	0
gag	AAA	0	0	0	gag	GTA	0	0	0	gag	AAT	0	0	0	gag	GTA	0	0	0	gag	ATA	0	0	0	gag	AAA	0	0	0	gag	AAA	0	0	0	gag	GTA	0	0	0	gag	ACT	0	0	0	gag	GTA	0	0	0
gag	GTA	0	0	0	gag	AAA	0	0	0	gag	TTC	0	0	0	gag	GAA	0	0	0	gag	GAA	0	0	0	gag	GTA	0	0	0	gag	GTG	0	0	0	gag	GAA	0	0	0	gag	TTA	0	0	0	gag	GTA	0	0	0
gag	GTA	0	0	0	gag	GTA	0	0	0	gag	CCT	0	0	0	gag	GAA	0	0	0	gag	GAA	0	0	0	gag	GTA	0	0	0	gag	GTA	0	0	0	gag	GAG	0	0	0	gag	AAT	0	0	0	gag	GAA	0	0	0
gag	GAA	0	0	0	gag	GTA	0	0	0	gag	ATA	0	0	0	gag	AAA	0	0	0	gag	AAG	0	0	0	gag	GAA	0	0	0	gag	GAG	0	0	0	gag	AAG	0	0	0	gag	GCA	0	0	0	gag	GAG	0	0	0
gag	GAA	0	0	0	gag	GAA	0	0	0	gag	GTA	0	0	0	gag	GCT	0	0	0	gag	GCT	0	0	0	gag	GAG	0	0	0	gag	GAG	0	0	0	gag	GCT	0	0	0	gag	TGG	1	3	0	gag	AAG	0	0	0
gag	AAG	0	0	0	gag	GAG	0	0	0	gag	CAG	0	0	0	gag	TTT	0	0	0	gag	TTC	0	0	0	gag	AAG	0	0	0	gag	AAG	0	0	0	gag	TTC	0	0	0	gag	GTA	0	0	0	gag	GCT	0	0	0
gag	GCT	0	0	0	gag	AAG	0	0	0	gag	AAC	0	0	0	gag	AGC	0	0	0	gag	AGC	0	0	0	gag	GCT	0	0	0	gag	GCT	0	0	0	gag	AGC	0	0	0	gag	AAA	0	0	0	gag	TTC	0	0	0
gag	TTC	0	0	0	gag	GCT	0	0	0	gag	CTT	0	0	0	gag	CCA	0	0	0	gag	CCA	0	0	0	gag	TTC	0	0	0	gag	TTC	0	0	0	gag	CCA	0	0	0	gag	GTA	0	0	0	gag	AGC	0	0	0
gag	AGC	0	0	0	gag	TTC	0	0	0	gag	CAG	0	0	0	gag	GAA	0	0	0	gag	GAA	0	0	0	gag	AGC	0	0	0	gag	AGC	0	0	0	gag	GAA	0	0	0	gag	GTA	0	0	0	gag	CCA	0	0	0
gag	CCA	0	0	0	gag	AGC	0	0	0	gag	GGA	0	0	0	gag	GTA	0	0	0	gag	GTA	0	0	0	gag	CCA	0	0	0	gag	CCA	0	0	0	gag	GTA	0	0	0	gag	GAA	0	0	0	gag	GAA	0	0	0
gag	GAG	0	0	0	gag	CCA	0	0	0	gag	CAA	0	0	0	gag	ATA	0	0	0	gag	ATA	0	0	0	gag	GAA	0	0	0	gag	GAA	0	0	0	gag	ATA	0	0	0	gag	GAG	0	0	0	gag	GTA	0	0	0
gag	GTA	0	0	0	gag	GAA	0	0	0	gag	ATG	0	0	0	gag	CCC	0	0	0	gag	CCC	0	0	0	gag	GTA	0	0	0	gag	GTA	0	0	0	gag	CCC	0	0	0	gag	AAG	0	0	0	gag	ATA	0	0	0
gag	ATA	0	0	0	gag	GTA	0	0	0	gag	GTA	0	0	0	gag	ATG	0	0	0	gag	ATG	0	0	0	gag	ATA	0	0	0	gag	ATA	0	0	0	gag	ATG	0	0	0	gag	GCT	0	0	0	gag	CCC	0	0	0
gag	CCC	0	0	0	gag	ATA	0	0	0	gag	CAT	0	0	0	gag	TTT	0	0	0	gag	TTC	0	0	0	gag	CCC	0	0	0	gag	CCC	0	0	0	gag	TTT	0	0	0	gag	TTC	0	0	0	gag	ATG	0	0	0
gag	ATG	0	0	0	gag	CCC	0	0	0	gag	CAG	0	0	0	gag	TCA	0	0	0	gag	TCA	0	0	0	gag	ATG	0	0	0	gag	ATG	0	0	0	gag	TCA	0	0	0	gag	AGC	0	0	0	gag	TTT	0	0	0
gag	TTT	0	0	0	gag	ATG	0	0	0	gag	GCC	0	0	0	gag	GCA	0	0	0	gag	GCA	0	0	0	gag	TTT	0	0	0	gag	TTT	0	0	0	gag	GCA	0	0	0	gag	CCA	0	0	0	gag	TCA	0	0	0
gag	TCA	0	0	0	gag	TTT	0	0	0	gag	TTA	0	0	0	gag	TTA	0	0	0	gag	TTA	0	0	0	gag	GCA	0	0	0	gag	TCA	0	0	0	gag	TTA	0	0	0	gag	GAA	0	0	0	gag	GCA	0	0	0
gag	GCA	0	0	0	gag	TCA	0	0	0	gag	TCG	0	0	0	gag	TCA	0	0	0	gag	TCA	0	0	0	gag	GCA	0	0	0	gag	GCA	0	0	0	gag	TCA	0	0	0	gag	GTA	0	0	0	gag	TTA	0	0	0
gag	TTA	0	0	0	gag	GCA	0	0	0	gag	CCT	0	0	0	gag	GAA	0	0	0	gag	GAA	0	0	0	gag	TTA	0	0	0	gag	TTA	0	0	0	gag	GAA	0	0	0	gag	ATA	0	0	0	gag	TCA	0	0	0
gag	TCA	0	0	0	gag	TTA	0	0	0	gag	AGA	0	0	0	gag	GGA	0	0	0	gag	GGA	0	0	0	gag	TCA	0	0	0	gag	TCA	0	0	0	gag	GGA	0	0	0	gag	CCT	0	0	0	gag	GAA	0	0	0
gag	GAA	0	0	0	gag	TCA	0	0	0	gag	ACT	0	0	0	gag	GCC	0	0	0	gag	GCC	0	0	0	gag	GAA	0	0	0	gag	GAA	0	0	0	gag	GCC	0	0	0	gag	ATG	0	0	0	gag	GGA	0	0	0
gag	GGA	0	0	0	gag	GAA	0	0	0	gag	TTA	0	0	0	gag	ACC	0	0	0	gag	ACC	0	0	0	gag	GGA	0	0	0	gag	GGA	0	0	0	gag	ACC	0	0	0	gag	TTC	0	0	0	gag	GCC	0	0	0
gag	GCC	0	0	0	gag	GGA	0	0	0	gag	AAT	0	0	0	gag	CCA	0	0	0	gag	CCA	0	0	0	gag	GCC	0	0	0	gag	GCT	0	0	0	gag	CCA	0	0	0	gag	ACA	0	0	0	gag	ACC	0	0	0
gag	ACC	0	0	0	gag	GCC	0	0	0	gag	GCA	0	0	0	gag	CAG	0	0	0	gag	CAA	0	0	0	gag	ACC	0	0	0	gag	ACC	0	0	0	gag	CAA	0	0	0	gag	GCA	0	0	0	gag	CCA	0	0	0
gag	CCA	0	0	0	gag	ACC	0	0	0	gag	TGG	0	4	0	gag	GAT	0	0	0	gag	GAT	0	0	0	gag	CCA	0	0	0	gag	CCA	0	0	0	gag	GAT	0	0	0	gag	TTA	0	0	0	gag	CAA	0	0	0
gag	CAG	0	0	0	gag	CCA	0	0	0	gag	GTA	0	0	0	gag	TTA	0	0	0	gag	TTA	0	0	0	gag	CAA	0	0	0	gag	CAA	0	0	0	gag	TTA	0	0	0	gag	TCA	0	0	0	gag	GAT	0	0	0
gag	GAT	0	0	0	gag	CAA	0	0	0	gag	AAA	0	0	0	gag	AAC	0	0	0	gag	AAC	0	0	0	gag	GAT	0	0	0	gag	GAC	0	0	0	gag	AAC	0	0	0	gag	GAA	0	0	0	gag	TTA	0	0	0
gag	TTA	0	0	0	gag	GAT	0	0	0	gag	GTA	0	0	0	gag	ACC	0	0	0	gag	ACC	0	0	0	gag	TTA	0	0	0	gag	TTA	0	0	0	gag	ACC	0	0	0	gag	GGA	0	0	0	gag	AAC	0	0	0
gag	AAC	0	0	0	gag	TTA	0	0	0	gag	GTA	0	0	0	gag	ATG	0	0	0	gag	ATG	0	0	0	gag	AAC	0	0	0	gag	AAC	0	0	0	gag	ATG	0	0	0	gag	GCC	0	0	0	gag	ACC	0	0	0
gag	ACC	0	0	0	gag	AAT	0	0	0	gag	GAA	0	0	0	gag	CTA	0	0	0	gag	CTA	0	0	0	gag	ACC	0	0	0	gag	ACC	0	0	0	gag	TTA	0	0	0	gag	ACC	0	0	0	gag	ATG	0	0	0
gag	ATG	0	0	0	gag	ACC	0	0	0	gag	GAA	0	0	0	gag	AAC	0	0	0	gag	AAC	0	0	0	gag	ATG	0	0	0	gag	ATG	0	0	0	gag	AAT	0	0	0	gag	CCA	0	0	0	gag	CTA	0	0	0
gag	CTA	0	0	0	gag	ATG	0	0	0	gag	AAG	0	0	0	gag	ACA	0	0	0	gag	ACA	0	0	0	gag	CTA	0	0	0	gag	TTA	0	0	0	gag	ACA	0	0	0	gag	CAA	0	0	0	gag	AAC	0	0	0
gag	AAC	0	0	0	gag	CTA	0	0	0	gag	GCT	0	0	0	gag	GTG	0	0	0	gag	GTG	0	0	0	gag	AAC	0	0	0	gag	AAC	0	0	0	gag	GTA	0	0	0	gag	GAT	0	0	0	gag	ACA	0	0	0
gag	ACA	0	0	0	gag	AAT	0	0	0	gag	TTC	0	0	0	gag	GGG	0	0	0	gag	GGG	0	0	0	gag	ACA	0	0	0	gag	ACA	0	0	0	gag	GGG	0	0	0	gag	TTA	0	0	0	gag	GTG	0	0	0
gag	GTG	0	0	0	gag	ACA	0	0	0	gag	AGT	0	0	0	gag	GGA	0	0	0	gag	GGA	0	0	0	gag	GTG	0	0	0	gag	GTG	0	0	0	gag	GGA	0	0	0	gag	AAC	0	0	0	gag	GGG	0	0	0
gag	GGG	0	0	0	gag	GTG	0	0	0	gag	CCA	0	0	0	gag	CAT	0	0	0	gag	CAT	0	0	0	gag	GGG	0	0	0	gag	GGG	0	0	0	gag	CAT	0	0	0	gag	ACC	0	0	0	gag	GGA	0	0	0
gag	GGA	0	0	0	gag	GGG	0	0	0	gag	GAA	0	0	0	gag	CAA	0	0	0	gag	CAA	0	0	0	gag	GGA	0	0	0	gag	GGA	0	0	0	gag	CAA	0	0	0	gag	ATG	0	0	0	gag	CAT	0	0	0
gag	CAT	0	0	0	gag	GGA	0	0	0	gag	GTA	0	0	0	gag	GCA	0	0	0	gag	GCA	0	0	0	gag	CAT	0	0	0	gag	CAT	0	0	0	gag	GCG	0	0	0	gag	CTA	0	0	0	gag	CAA	0	0	0
gag	CAA	0	0	0	gag	CAT	0	0	0	gag	ATA	0	0	0	gag	GCT	0	0	0	gag	GCC	0	0	0	gag	CAA	0	0	0	gag	CAA	0	0	0	gag	GCC	0	0	0	gag	AAT	0	0	0	gag	GCA	0	0	0
gag	GCA	0	0	0	gag	CAA	0	0	0	gag	CCC	0	0	0	gag	ATG	0	0	0	gag	ATG	0	0	0	gag	GCA	0	0	0	gag	GCA	0	0	0	gag	ATG	0	0	0	gag	ACA	0	0	0	gag	GCT	0	0	0
gag	GCC	0	0	0	gag	GCA	0	0	0	gag	ATG	0	0	0	gag	CAA	0	0	0	gag	CAA	0	0	0	gag	GCC	0	0	0	gag	GCC	0	0	0	gag	CAG	0	0	0	gag	GTG	0	0	0	gag	ATG	0	0	0
gag	ATG	0	0	0	gag	GCC	0	0	0	gag	TTT	0	0	0	gag	ATG	0	0	0	gag	ATG	0	0	0	gag	ATG	0	0	0	gag	ATG	0	0	0	gag	ATG	0	0	0	gag	GGG	0	0	0	gag	CAA	0	0	0
gag	CAA	0	0	0	gag	ATG	0	0	0	gag	TCA	0	0	0	gag	TTA	0	0	0	gag	TTA	0	0	0	gag	CAA	0	0	0	gag	CAA	0	0	0	gag	CTA	0	0	0	gag	GGA	0	0	0	gag	ATG	0	0	0
gag	ATG	0	0	0	gag	CAA	0	0	0	gag	GCA	0	0	0	gag	AAA	0	0	0	gag	AAA	0	0	0	gag	ATA	0	0	0	gag	ATG	0	0	0	gag	AAA	0	0	0	gag	CAT	0	0	0	gag	TTA	0	0	0
gag	TTA	0	0	0	gag	ATG	0	0	0	gag	TTA	0	0	0	gag	GAA	0	0	0	gag	GAA	0	0	0	gag	TTA	0	0	0	gag	CTA	0	0	0	gag	GAG	0	0	0	gag	CAG	0	0	0	gag	AAA	0	0	0
gag	AAA	0	0	0	gag	TTA	0	0	0	gag	TCA	0	0	0	gag	ACC	0	0	0	gag	ACC	0	0	0	gag	AAA	0	0	0	gag	AAA	0	0	0	gag	ACC	0	0	0	gag	GCA	0	0	0	gag	GAA	0	0	0
gag	GAG	0	0	0	gag	AAG	0	0	0	gag	GAG	0	0	0	gag	ATC	0	0	0	gag	ATC	0	0	0	gag	GAG	0	0	0	gag	GAG	0	0	0	gag	ATC	0	0	0	gag	GCC	0	0	0	gag	ACC	0	0	0
gag	ACC	0	0	0	gag	GAG	0	0	0	gag	GGA	0	0	0	gag	AAT	0	0	0	gag	AAT	0	0	0	gag	ACC	0	0	0	gag	ACC	0	0	0	gag	AAT	0	0	0	gag	ATG	0	0	0	gag	ATC	0	0	0
gag	ATC	0	0	0	gag	ACC	0	0	0	gag	GCC	0	0	0	gag	GAG	0	0	0	gag	GAT	0	0	0	gag	ATT	0	0	0	gag	ATC	0	0	0	gag	GAG	0	0	0	gag	CAA	0	0	0	gag	AAT	0	0	0
gag	AAT	0	0	0	gag	ATC	0	0	0	gag	ACC	0	0	0	gag	GAA	0	0	0	gag	GAG	0	0	0	gag	AAT	0	0	0	gag	AAT	0	0	0	gag	GAA	0	0	0	gag	ATG	0	0	0	gag	GAG	0	0	0
gag	GAG	0	0	0	gag	AAT	0	0	0	gag	CCA	0	0	0	gag	GCT	0	0	0	gag	GCT	0	0	0	gag	GAG	0	0	0	gag	GAG	0	0	0	gag	GCT	0	0	0	gag	TTA	0	0	0	gag	GAA	0	0	0
gag	GAA	0	0	0	gag	GAG	0	0	0	gag	CAA	0	0	0	gag	GCA	0	0	0	gag	GCA	0	0	0	gag	GAA	0	0	0	gag	GAA	0	0	0	gag	GCA	0	0	0	gag	AAG	0	0	0	gag	GCT	0	0	0
gag	GCT	0	0	0	gag	GAA	0	0	0	gag	GAT	0	0	0	gag	GAA	0	0	0	gag	GAA	0	0	0	gag	GCT	0	0	0	gag	GCT	0	0	0	gag	GAA	0	0	0	gag	GAG	0	0	0	gag	GCA	0	0	0
gag	GCA	0	0	0	gag	GCT	0	0	0	gag	TTA	0	0	0	gag	TGG	2	1	0	gag	TGG	0	4	0	gag	GCA	0	0	0	gag	GCA	0	0	0	gag	TGG	0	4	0	gag	ACC	0	0	0	gag	GAA	0	0	0
gag	GAA	0	0	0	gag	GCA	0	0	0	gag	AAC	0	0	0	gag	GAT	0	0	0	gag	GAC	0	0	0	gag	GAA	0	0	0	gag	GAA	0	0	0	gag	GAT	0	0	0	gag	ATC	0	0	0	gag	TGG	3	5	2
gag	TGG	0	0	0	gag	GAA	0	0	0	gag	ACC	0	0	0	gag	AGA	0	0	0	gag	AGA	0	0	0	gag	TGG	1	4	0	gag	TGG	1	7	0	gag	AGA	0	0	0	gag	AAT	0	0	0	gag	GAT	0	0	0
gag	GAT	0	0	0	gag	TGG	1	2	0	gag	ATG	0	0	0	gag	TTA	0	0	0	gag	TTG	0	0	0	gag	GAT	0	0	0	gag	GAT	0	0	0	gag	GTG	0	0	0	gag	GAG	0	0	0	gag	AGA	0	0	0
gag	AGA	0	0	0	gag	GAT	0	0	0	gag	CTA	0	0	0	gag	CAC	0	0	0	gag	CAT	0	0	0	gag	AGA	0	0	0	gag	AGA	0	0	0	gag	CAC	0	0	0	gag	GAA	0	0	0	gag	TTG	0	0	0
gag	TTG	0	0	0	gag	AGA	0	0	0	gag	AAC	0	0	0	gag	CCA	0	0	0	gag	CCA	0	0	0	gag	TTG	0	0	0	gag	TTG	0	0	0	gag	CCA	0	0	0	gag	GCT	0	0	0	gag	CAC	0	0	0
gag	CAT	0	0	0	gag	TTG	0	0	0	gag	ACA	0	0	0	gag	CCA	0	0	0	gag	GTG	0	0	0	gag	CAT	0	0	0	gag	CAT	0	0	0	gag	GTG	0	0	0	gag	GCA	0	0	0	gag	CCA	0	0	0
gag	CCA	0	0	0	gag	CAT	0	0	0	gag	GTG	0	0	0	gag	CAG	0	0	0	gag	CAT	0	0	0	gag	CCA	0	0	0	gag	CCA	0	0	0	gag	CAT	0	0	0	gag	GAA	0	0	0	gag	GTG	0	0	0
gag	GTG	0	0	0	gag	CCA	0	0	0	gag	GGT	0	0	0	gag	GCA	0	0	0	gag	GCA	0	0	0	gag	GTG	0	0	0	gag	GTA	0	0	0	gag	GCA	0	0	0	gag	TGG	1	4	0	gag	CAT	0	0	0
gag	CAT	0	0	0	gag	GTG	0	0	0	gag	GGA	0	0	0	gag	GGG	0	0	0	gag	GGG	0	0	0	gag	CAT	0	0	0	gag	CAG	0	0	0	gag	GGG	0	0	0	gag	GAT	0	0	0	gag	GCA	0	0	0
gag	GCA	0	0	0	gag	CAT	0	0	0	gag	CAC	0	0	0	gag	CCT	0	0	0	gag	CCT	0	0	0	gag	GCA	0	0	0	gag	GCA	0	0	0	gag	CCT	0	0	0	gag	AGA	0	0	0	gag	GGG	0	0	0
gag	GGG	0	0	0	gag	GCA	0	0	0	gag	CAA	0	0	0	gag	GTT	0	0	0	gag	ATT	0	0	0	gag	GGG	0	0	0	gag	GGG	0	0	0	gag	ATT	0	0	0	gag	TTA	0	0	0	gag	CCT	0	0	0
gag	CCA	0	0	0	gag	GGG	0	0	0	gag	GCA	0	0	0	gag	GCA	0	0	0	gag	GCA	0	0	0	gag	CCT	0	0	0	gag	CCT	0	0	0	gag	GCA	0	0	0	gag	CAT	0	0	0	gag	GTT	0	0	0
gag	GTG	0	0	0	gag	CCT	0	0	0	gag	GCC	0	0	0	gag	CCA	0	0	0	gag	CCA	0	0	0	gag	ATT	0	0	0	gag	GTC	0	0	0	gag	CCA	0	0	0	gag	CCA	0	0	0	gag	GCA	0	0	0
gag	GCA	0	0	0	gag	GTT	0	0	0	gag	ATG	0	0	0	gag	GGC	0	0	0	gag	GGC	0	0	0	gag	GCA	0	0	0	gag	GCA	0	0	0	gag	GGC	0	0	0	gag	GTA	0	0	0	gag	CCA	0	0	0
gag	CCA	0	0	0	gag	GCA	0	0	0	gag	CAA	0	0	0	gag	CAG	0	0	0	gag	CAG	0	0	0	gag	CCA	0	0	0	gag	CCA	0	0	0	gag	CAG	0	0	0	gag	CAG	0	0	0	gag	GGC	0	0	0
gag	GGC	0	0	0	gag	CCA	0	0	0	gag	ATG	0	0	0	gag	ATG	0	0	0	gag	ATG	0	0	0	gag	GGC	0	0	0	gag	GGC	0	0	0	gag	ATG	0	0	0	gag	GCA	0	0	0	gag	CAG	0	0	0
gag	CAG	0	0	0	gag	GGC	0	0	0	gag	TTA	0	0	0	gag	AGA	0	0	0	gag	AGA	0	0	0	gag	CAG	0	0	0	gag	CAG	0	0	0	gag	AGA	0	0	0	gag	GGG	0	0	0	gag	ATG	0	0	0
gag	ATG	0	0	0	gag	CAG	0	0	0	gag	AAA	0	0	0	gag	GAC	0	0	0	gag	GAA	0	0	0	gag	ATA	0	0	0	gag	ATA	0	0	0	gag	GAA	0	0	0	gag	CCT	0	0	0	gag	AGA	0	0	0
gag	AGA	0	0	0	gag	ATG	0	0	0	gag	GAG	0	0	0	gag	CCA	0	0	0	gag	CCA	0	0	0	gag	AGA	0	0	0	gag	AGA	0	0	0	gag	CCA	0	0	0	gag	ATT	0	0	0	gag	GAA	0	0	0
gag	GAA	0	0	0	gag	AGA	0	0	0	gag	ACC	0	0	0	gag	AGG	0	0	0	gag	AGA	0	0	0	gag	GAA	0	0	0	gag	GAA	0	0	0	gag	AGG	0	0	0	gag	GCA	0	0	0	gag	CCA	0	0	0
gag	CCA	0	0	0	gag	GAA	0	0	0	gag	ATC	0	0	0	gag	GGA	0	0	0	gag	GGA	0	0	0	gag	CCA	0	0	0	gag	CCA	0	0	0	gag	GGA	0	0	0	gag	CCA	0	0	0	gag	AGG	0	0	0
gag	AGG	0	0	0	gag	CCA	0	0	0	gag	AAT	0	0	0	gag	AGT	0	0	0	gag	AGT	0	0	0	gag	AGG	0	0	0	gag	AGG	0	0	0	gag	AGT	0	0	0	gag	GGC	0	0	0	gag	GGA	0	0	0
gag	GGA	0	0	0	gag	AGG	0	0	0	gag	GAG	0	0	0	gag	GAC	0	0	0	gag	GAC	0	0	0	gag	GGA	0	0	0	gag	GGA	0	0	0	gag	GAC	0	0	0	gag	CAG	0	0	0	gag	AGT	0	0	0
gag	AGT	0	0	0	gag	GGA	0	0	0	gag	GAA	0	0	0	gag	ATA	0	0	0	gag	ATA	0	0	0	gag	AGT	0	0	0	gag	AGT	0	0	0	gag	ATA	0	0	0	gag	ATA	0	0	0	gag	GAC	0	0	0
gag	GAT	0	0	0	gag	AGT	0	0	0	gag	GCT	0	0	0	gag	GCA	0	0	0	gag	GCA	0	0	0	gag	GAC	0	0	0	gag	GAC	0	0	0	gag	GCA	0	0	0	gag	AGA	0	0	0	gag	ATA	0	0	0
gag	ATA	0	0	0	gag	GAT	0	0	0	gag	GCA	0	0	0	gag	GGA	0	0	0	gag	GGA	0	0	0	gag	ATA	0	0	0	gag	ATA	0	0	0	gag	GGA	0	0	0	gag	GAA	0	0	0	gag	GCA	0	0	0
gag	GCA	0	0	0	gag	ATA	0	0	0	gag	GAA	0	0	0	gag	ACT	0	0	0	gag	ACC	0	0	0	gag	GCA	0	0	0	gag	GCA	0	0	0	gag	ACT	0	0	0	gag	CCA	0	0	0	gag	GGA	0	0	0
gag	GGA	0	0	0	gag	GCT	0	0	0	gag	TGG	0	4	0	gag	ACT	0	0	0	gag	ACT	0	0	0	gag	GGA	0	0	0	gag	GGA	0	0	0	gag	ACT	0	0	0	gag	AGG	0	0	0	gag	ACT	0	0	0
gag	ACT	0	0	0	gag	GGA	0	0	0	gag	GAT	0	0	0	gag	AGT	0	0	0	gag	AGT	0	0	0	gag	ACT	0	0	0	gag	ACT	0	0	0	gag	AGT	0	0	0	gag	GGA	0	0	0	gag	ACT	0	0	0
gag	ACT	0	0	0	gag	ACT	0	0	0	gag	AGG	0	0	0	gag	ACC	0	0	0	gag	ACC	0	0	0	gag	ACT	0	0	0	gag	ACT	0	0	0	gag	ACC	0	0	0	gag	AGT	0	0	0	gag	AGT	0	0	0
gag	AGT	0	0	0	gag	ACT	0	0	0	gag	TTG	0	0	0	gag	CTT	0	0	0	gag	CTT	0	0	0	gag	AGC	0	0	0	gag	AGT	0	0	0	gag	CTT	0	0	0	gag	GAC	0	0	0	gag	ACC	0	0	0
gag	ACC	0	0	0	gag	AGT	0	0	0	gag	CAT	0	0	0	gag	CAG	0	0	0	gag	CAG	0	0	0	gag	AGC	0	0	0	gag	ACC	0	0	0	gag	CAG	0	0	0	gag	ATA	0	0	0	gag	CTT	0	0	0
gag	CTG	0	0	0	gag	ACC	0	0	0	gag	CCA	0	0	0	gag	GAA	0	0	0	gag	GAA	0	0	0	gag	CTT	0	0	0	gag	CTT	0	0	0	gag	GAA	0	0	0	gag	GCA	0	0	0	gag	CAG	0	0	0
gag	CAG	0	0	0	gag	CTT	0	0	0	gag	GTA	0	0	0	gag	CAA	0	0	0	gag	CAA	0	0	0	gag	CAG	0	0	0	gag	CAA	0	0	0	gag	CAA	0	0	0	gag	GGA	0	0	0	gag	GAA	0	0	0
gag	GAA	0	0	0	gag	CAA	0	0	0	gag	CAT	0	0	0	gag	ATA	0	0	0	gag	ATA	0	0	0	gag	GAA	0	0	0	gag	GAA	0	0	0	gag	ATA	0	0	0	gag	ACT	0	0	0	gag	CAA	0	0	0
gag	CAA	0	0	0	gag	GAA	0	0	0	gag	GCA	0	0	0	gag	GGA	0	0	0	gag	GCA	0	0	0	gag	CAA	0	0	0	gag	CAA	0	0	0	gag	GGA	0	0	0	gag	ACT	0	0	0	gag	ATA	0	0	0
gag	ATA	0	0	0	gag	CAA	0	0	0	gag	GGA	0	0	0	gag	TGG	0	3	1	gag	TGG	0	2	0	gag	ATA	0	0	0	gag	ATA	0	0	0	gag	TGG	0	2	0	gag	AGT	0	0	0	gag	GGA	0	0	0
gag	GGA	0	0	0	gag	ATA	0	0	0	gag	CCT	0	0	0	gag	ATG	0	0	0	gag	ATG	0	0	0	gag	GCA	0	0	0	gag	GCA	0	0	0	gag	ATG	0	0	0	gag	ACC	0	0	0	gag	TGG	1	2	0
gag	TGG	1	0	2	gag	GGA	0	0	0	gag	ATT	0	0	0	gag	ACA	0	0	0	gag	ACA	0	0	0	gag	TGG	0	3	2	gag	TGG	0	6	0	gag	ACA	0	0	0	gag	CTT	0	0	0	gag	ATG	0	0	0
gag	ATG	0	0	0	gag	TGG	0	2	0	gag	GCA	0	0	0	gag	AGT	0	0	0	gag	AAT	0	0	0	gag	ATG	0	0	0	gag	ATG	0	0	0	gag	AAT	0	0	0	gag	CAG	0	0	0	gag	ACA	0	0	0
gag	ACA	0	0	0	gag	ATG	0	0	0	gag	CCA	0	0	0	gag	AAT	0	0	0	gag	AAT	0	0	0	gag	ACA	0	0	0	gag	ACA	0	0	0	gag	AAT	0	0	0	gag	GAA	0	0	0	gag	AAT	0	0	0
gag	AAT	0	0	0	gag	ACA	0	0	0	gag	GGC	0	0	0	gag	CCA	0	0	0	gag	CCA	0	0	0	gag	AAT	0	0	0	gag	CAT	0	0	0	gag	CCA	0	0	0	gag	CAA	0	0	0	gag	AAT	0	0	0
gag	AAT	0	0	0	gag	AAT	0	0	0	gag	CAG	0	0	0	gag	CCT	0	0	0	gag	CCT	0	0	0	gag	AAT	0	0	0	gag	AAT	0	0	0	gag	CCT	0	0	0	gag	ATA	0	0	0	gag	CCA	0	0	0
gag	CCA	0	0	0	gag	AAT	0	0	0	gag	ATG	0	0	0	gag	ATC	0	0	0	gag	ATC	0	0	0	gag	CCA	0	0	0	gag	CCA	0	0	0	gag	ATC	0	0	0	gag	ACA	0	0	0	gag	CCT	0	0	0
gag	CCT	0	0	0	gag	CCA	0	0	0	gag	AGA	0	0	0	gag	CCA	0	0	0	gag	CCA	0	0	0	gag	CCT	0	0	0	gag	CCT	0	0	0	gag	CCA	0	0	0	gag	TGG	0	3	1	gag	ATC	0	0	0
gag	ATC	0	0	0	gag	CCT	0	0	0	gag	GAA	0	0	0	gag	GTA	0	0	0	gag	GTA	0	0	0	gag	ATC	0	0	0	gag	ATC	0	0	0	gag	GTA	0	0	0	gag	ATG	0	0	0	gag	CCA	0	0	0
gag	CCA	0	0	0	gag	ATC	0	0	0	gag	CCA	0	0	0	gag	GGA	0	0	0	gag	GGA	0	0	0	gag	CCA	0	0	0	gag	CCG	0	0	0	gag	GGA	0	0	0	gag	ACA	0	0	0	gag	GTA	0	0	0
gag	GTA	0	0	0	gag	CCA	0	0	0	gag	AGG	0	0	0	gag	GAA	0	0	0	gag	GAA	0	0	0	gag	GTA	0	0	0	gag	GTA	0	0	0	gag	GAA	0	0	0	gag	AGT	0	0	0	gag	GGA	0	0	0
gag	GGA	0	0	0	gag	GTA	0	0	0	gag	GGA	0	0	0	gag	ATT	0	0	0	gag	ATC	0	0	0	gag	GGA	0	0	0	gag	GGA	0	0	0	gag	ATC	0	0	0	gag	AAT	0	0	0	gag	GAA	0	0	0
gag	GAA	0	0	0	gag	GGA	0	0	0	gag	AGT	0	0	0	gag	TAT	0	0	0	gag	TAT	0	0	0	gag	GAA	0	0	0	gag	GAA	0	0	0	gag	TAT	0	0	0	gag	CCA	0	0	0	gag	ATC	0	0	0
gag	ATT	0	0	0	gag	GAA	0	0	0	gag	GAT	0	0	0	gag	AAA	0	0	0	gag	AAA	0	0	0	gag	ATC	0	0	0	gag	ATT	0	0	0	gag	AAA	0	0	0	gag	CCT	0	0	0	gag	TAT	0	0	0
gag	TAT	0	0	0	gag	ATC	0	0	0	gag	ATA	0	0	0	gag	AGA	0	0	0	gag	AGA	0	0	0	gag	TAT	0	0	0	gag	TAT	0	0	0	gag	AGA	0	0	0	gag	ATC	0	0	0	gag	AAA	0	0	0
gag	AAA	0	0	0	gag	TAT	0	0	0	gag	GCA	0	0	0	gag	TGG	0	2	2	gag	TGG	0	2	0	gag	AAA	0	0	0	gag	AAA	0	0	0	gag	TGG	0	2	0	gag	CCA	0	0	0	gag	AGA	0	0	0
gag	AGA	0	0	0	gag	AAA	0	0	0	gag	GGA	0	0	0	gag	ATA	0	0	0	gag	ATA	0	0	0	gag	AAA	0	0	0	gag	AGA	0	0	0	gag	ATA	0	0	0	gag	GTA	0	0	0	gag	TGG	0	5	2
gag	TGG	1	1	0	gag	AGA	0	0	0	gag	ACT	0	0	0	gag	ATC	0	0	0	gag	ATC	0	0	0	gag	TGG	3	1	1	gag	TGG	1	5	0	gag	ATT	0	0	0	gag	GGA	0	0	0	gag	ATA	0	0	0
gag	ATA	0	0	0	gag	TGG	0	2	0	gag	ACT	0	0	0	gag	CTG	0	0	0	gag	CTA	0	0	0	gag	ATA	0	0	0	gag	ATA	0	0	0	gag	CTG	0	0	0	gag	GAA	0	0	0	gag	ATC	0	0	0
gag	ATC	0	0	0	gag	ATA	0	0	0	gag	AGT	0	0	0	gag	GGA	0	0	0	gag	GGG	0	0	0	gag	ATT	0	0	0	gag	ATC	0	0	0	gag	GGA	0	0	0	gag	ATT	0	0	0	gag	CTG	0	0	0
gag	TTG	0	0	0	gag	ATC	0	0	0	gag	ACC	0	0	0	gag	TTA	0	0	0	gag	TTA	0	0	0	gag	ATG	0	0	0	gag	TTG	0	0	0	gag	TTA	0	0	0	gag	TAT	0	0	0	gag	GGA	0	0	0
gag	GGG	0	0	0	gag	CTG	0	0	0	gag	CTC	0	0	0	gag	AAT	0	0	0	gag	AAT	0	0	0	gag	GGG	0	0	0	gag	GGA	0	0	0	gag	AAT	0	0	0	gag	AAA	0	0	0	gag	TTA	0	0	0
gag	TTA	0	0	0	gag	GGA	0	0	0	gag	CAG	0	0	0	gag	AAA	0	0	0	gag	AAA	0	0	0	gag	TTA	0	0	0	gag	TTA	0	0	0	gag	AAA	0	0	0	gag	AGA	0	0	0	gag	AAT	0	0	0
gag	AAT	0	0	0	gag	TTA	0	0	0	gag	GAA	0	0	0	gag	ATA	0	0	0	gag	ATA	0	0	0	gag	AAT	0	0	0	gag	AAT	0	0	0	gag	ATA	0	0	0	gag	TGG	0	3	1	gag	AAA	0	0	0
gag	AAA	0	0	0	gag	AAT	0	0	0	gag	CAA	0	0	0	gag	GTA	0	0	0	gag	GTA	0	0	0	gag	AAA	0	0	0	gag	AAA	0	0	0	gag	GTA	0	0	0	gag	ATA	0	0	0	gag	ATA	0	0	0
gag	ATA	0	0	0	gag	AAA	0	0	0	gag	ATA	0	0	0	gag	AGG	0	0	0	gag	AGA	0	0	0	gag	ATA	0	0	0	gag	ATA	0	0	0	gag	AGA	0	0	0	gag	GTC	0	0	0	gag	GTA	0	0	0
gag	GTA	0	0	0	gag	ATA	0	0	0	gag	GCC	0	0	0	gag	ATG	0	0	0	gag	ATG	0	0	0	gag	GTA	0	0	0	gag	GTA	0	0	0	gag	ATG	0	0	0	gag	ATA	0	0	0	gag	AGG	0	0	0
gag	AGG	0	0	0	gag	GTA	0	0	0	gag	TGG	1	3	0	gag	TAT	0	0	0	gag	TAT	0	0	0	gag	AGA	0	0	0	gag	AGA	0	0	0	gag	TAT	0	0	0	gag	GGA	0	0	0	gag	ATG	0	0	0
gag	ATG	0	0	0	gag	AGA	0	0	0	gag	ATG	0	0	0	gag	AGT	0	0	0	gag	AGC	0	0	0	gag	ATG	0	0	0	gag	ATG	0	0	0	gag	AGC	0	0	0	gag	TTA	0	0	0	gag	TAT	0	0	0
gag	TAT	0	0	0	gag	ATG	0	0	0	gag	ACA	0	0	0	gag	CCT	0	0	0	gag	CCC	0	0	0	gag	TAT	0	0	0	gag	TAT	0	0	0	gag	CCC	0	0	0	gag	AAT	0	0	0	gag	AGC	0	0	0
gag	AGC	0	0	0	gag	TAT	0	0	0	gag	AAT	0	0	0	gag	ACT	0	0	0	gag	GTC	0	0	0	gag	AGC	0	0	0	gag	AGC	0	0	0	gag	ACC	0	0	0	gag	AAA	0	0	0	gag	CCT	0	0	0
gag	CCT	0	0	0	gag	AGC	0	0	0	gag	AAT	0	0	0	gag	AGC	0	0	0	gag	AGC	0	0	0	gag	CCC	0	0	0	gag	CCT	0	0	0	gag	AGC	0	0	0	gag	ATA	0	0	0	gag	ACC	0	0	0
gag	GTC	0	0	0	gag	CCT	0	0	0	gag	CCA	0	0	0	gag	ATT	0	0	0	gag	ATT	0	0	0	gag	ACC	0	0	0	gag	GTC	0	0	0	gag	ATT	0	0	0	gag	GTA	0	0	0	gag	AGC	0	0	0
gag	AGC	0	0	0	gag	ACT	0	0	0	gag	CCT	0	0	0	gag	CTA	0	0	0	gag	CTG	0	0	0	gag	AGT	0	0	0	gag	AGC	0	0	0	gag	TTG	0	0	0	gag	AGA	0	0	0	gag	ATT	0	0	0
gag	ATT	0	0	0	gag	AGC	0	0	0	gag	ATC	0	0	0	gag	GAC	0	0	0	gag	GAC	0	0	0	gag	ATT	0	0	0	gag	ATT	0	0	0	gag	GAC	0	0	0	gag	ATG	0	0	0	gag	TTG	0	0	0
gag	CTG	0	0	0	gag	ATT	0	0	0	gag	CCA	0	0	0	gag	ATA	0	0	0	gag	ATA	0	0	0	gag	CTG	0	0	0	gag	CTG	0	0	0	gag	ATA	0	0	0	gag	TAT	0	0	0	gag	GAC	0	0	0
gag	GAC	0	0	0	gag	CTG	0	0	0	gag	GTA	0	0	0	gag	AGA	0	0	0	gag	AAA	0	0	0	gag	GAC	0	0	0	gag	GAC	0	0	0	gag	AGA	0	0	0	gag	AGC	0	0	0	gag	ATA	0	0	0
gag	ATA	0	0	0	gag	GAC	0	0	0	gag	GGA	0	0	0	gag	CAA	0	0	0	gag	CAA	0	0	0	gag	ATA	0	0	0	gag	ATA	0	0	0	gag	CAG	0	0	0	gag	CCT	0	0	0	gag	AAA	0	0	0
gag	AGA	0	0	0	gag	ATA	0	0	0	gag	GAA	0	0	0	gag	GGA	0	0	0	gag	GGA	0	0	0	gag	AAA	0	0	0	gag	AGA	0	0	0	gag	GGG	0	0	0	gag	ACC	0	0	0	gag	CAA	0	0	0
gag	CAA	0	0	0	gag	AGA	0	0	0	gag	ATC	0	0	0	gag	CCA	0	0	0	gag	CCA	0	0	0	gag	CAA	0	0	0	gag	CAA	0	0	0	gag	CCA	0	0	0	gag	AGC	0	0	0	gag	GGA	0	0	0
gag	GGA	0	0	0	gag	CAA	0	0	0	gag	TAT	0	0	0	gag	AAA	0	0	0	gag	AAG	0	0	0	gag	GGA	0	0	0	gag	GGA	0	0	0	gag	AAG	0	0	0	gag	ATT	0	0	0	gag	CCA	0	0	0
gag	CCA	0	0	0	gag	GGA	0	0	0	gag	AAA	0	0	0	gag	GAA	0	0	0	gag	GAA	0	0	0	gag	CCA	0	0	0	gag	CCA	0	0	0	gag	GAG	0	0	0	gag	CTG	0	0	0	gag	AAA	0	0	0
gag	AAA	0	0	0	gag	CCA	0	0	0	gag	AGA	0	0	0	gag	CCC	0	0	0	gag	CCC	0	0	0	gag	AAG	0	0	0	gag	AAG	0	0	0	gag	CCC	0	0	0	gag	GAT	0	0	0	gag	GAA	0	0	0
gag	GAA	0	0	0	gag	AAG	0	0	0	gag	TGG	0	1	1	gag	TTT	0	0	0	gag	TTT	0	0	0	gag	GAA	0	0	0	gag	GAA	0	0	0	gag	TTT	0	0	0	gag	ATA	0	0	0	gag	CCC	0	0	0
gag	CCC	0	0	0	gag	GAA	0	0	0	gag	ATA	0	0	0	gag	AGA	0	0	0	gag	AGA	0	0	0	gag	CCC	0	0	0	gag	CCT	0	0	0	gag	AGA	0	0	0	gag	AAA	0	0	0	gag	TTT	0	0	0
gag	TTT	0	0	0	gag	CCC	0	0	0	gag	ATC	0	0	0	gag	GAC	0	0	0	gag	GAT	0	0	0	gag	TTT	0	0	0	gag	TTT	0	0	0	gag	GAT	0	0	0	gag	CAA	0	0	0	gag	AGA	0	0	0
gag	AGA	0	0	0	gag	TTT	0	0	0	gag	CTA	0	0	0	gag	TAT	0	0	0	gag	TAT	0	0	0	gag	AGA	0	0	0	gag	AGA	0	0	0	gag	TAT	0	0	0	gag	GGA	0	0	0	gag	GAT	0	0	0
gag	GAC	0	0	0	gag	AGA	0	0	0	gag	GGA	0	0	0	gag	GTA	0	0	0	gag	GTA	0	0	0	gag	GAT	0	0	0	gag	GAC	0	0	0	gag	GTA	0	0	0	gag	CCA	0	0	0	gag	TAT	0	0	0
gag	TAT	0	0	0	gag	GAC	0	0	0	gag	TTA	0	0	0	gag	GAT	0	0	0	gag	GAC	0	0	0	gag	TAT	0	0	0	gag	TAT	0	0	0	gag	GAT	0	0	0	gag	AAG	0	0	0	gag	GTA	0	0	0
gag	GTA	0	0	0	gag	TAT	0	0	0	gag	AAT	0	0	0	gag	CGG	0	0	0	gag	CGG	0	0	0	gag	GTA	0	0	0	gag	GTA	0	0	0	gag	CGG	0	0	0	gag	GAA	0	0	0	gag	GAC	0	0	0
gag	GAC	0	0	0	gag	GTA	0	0	0	gag	AAA	0	0	0	gag	TTC	0	0	0	gag	TTT	0	0	0	gag	GAC	0	0	0	gag	GAT	0	0	0	gag	TTC	0	0	0	gag	CCC	0	0	0	gag	CGG	0	0	0
gag	CGG	0	0	0	gag	GAC	0	0	0	gag	ATA	0	0	0	gag	TAT	0	0	0	gag	TAT	0	0	0	gag	CGG	0	0	0	gag	CGG	0	0	0	gag	TAT	0	0	0	gag	TTT	0	0	0	gag	TTC	0	0	0
gag	TTC	0	0	0	gag	CGG	0	0	0	gag	GTA	0	0	0	gag	AAA	0	0	0	gag	AAA	0	0	0	gag	TTC	0	0	0	gag	TTC	0	0	0	gag	AAA	0	0	0	gag	AGA	0	0	0	gag	TAT	0	0	0
gag	TAT	0	0	0	gag	TTC	0	0	0	gag	AGA	0	0	0	gag	ACT	0	0	0	gag	ACT	0	0	0	gag	TAT	0	0	0	gag	TAT	0	0	0	gag	ACC	0	0	0	gag	GAT	0	0	0	gag	AAA	0	0	0
gag	AAA	0	0	0	gag	TAT	0	0	0	gag	ATG	0	0	0	gag	CTA	0	0	0	gag	CTA	0	0	0	gag	AAA	0	0	0	gag	AAA	0	0	0	gag	TTA	0	0	0	gag	TAT	0	0	0	gag	ACT	0	0	0
gag	ACT	0	0	0	gag	AAA	0	0	0	gag	TAT	0	0	0	gag	AGA	0	0	0	gag	AGA	0	0	0	gag	ACT	0	0	0	gag	ACT	0	0	0	gag	AGG	0	0	0	gag	GTA	0	0	0	gag	CTA	0	0	0
gag	CTA	0	0	0	gag	ACT	0	0	0	gag	AGC	0	0	0	gag	GCC	0	0	0	gag	GCC	0	0	0	gag	CTA	0	0	0	gag	CTA	0	0	0	gag	GCC	0	0	0	gag	GAT	0	0	0	gag	AGA	0	0	0
gag	AGA	0	0	0	gag	TTA	0	0	0	gag	CCC	0	0	0	gag	GAG	0	0	0	gag	GAG	0	0	0	gag	AGA	0	0	0	gag	AGA	0	0	0	gag	GAG	0	0	0	gag	CGG	0	0	0	gag	GCC	0	0	0
gag	GCC	0	0	0	gag	AGA	0	0	0	gag	ACC	0	0	0	gag	CAA	0	0	0	gag	CAA	0	0	0	gag	GCA	0	0	0	gag	GCT	0	0	0	gag	CAA	0	0	0	gag	TTC	0	0	0	gag	GAG	0	0	0
gag	GAG	0	0	0	gag	GCC	0	0	0	gag	AGC	0	0	0	gag	GCT	0	0	0	gag	GCT	0	0	0	gag	GAG	0	0	0	gag	GAA	0	0	0	gag	GCT	0	0	0	gag	TAT	0	0	0	gag	CAA	0	0	0
gag	CAA	0	0	0	gag	GAG	0	0	0	gag	ATT	0	0	0	gag	TCA	0	0	0	gag	ACA	0	0	0	gag	CAA	0	0	0	gag	CAA	0	0	0	gag	TCA	0	0	0	gag	AAA	0	0	0	gag	GCT	0	0	0
gag	GCT	0	0	0	gag	CAA	0	0	0	gag	CTG	0	0	0	gag	CAG	0	0	0	gag	CAG	0	0	0	gag	GCT	0	0	0	gag	GCT	0	0	0	gag	CAG	0	0	0	gag	GTT	0	0	0	gag	TCA	0	0	0
gag	TCA	0	0	0	gag	GCT	0	0	0	gag	GAC	0	0	0	gag	GAA	0	0	0	gag	GAG	0	0	0	gag	TCA	0	0	0	gag	TCA	0	0	0	gag	GAA	0	0	0	gag	CTA	0	0	0	gag	CAG	0	0	0
gag	CAG	0	0	0	gag	TCA	0	0	0	gag	ATA	0	0	0	gag	GTA	0	0	0	gag	GTA	0	0	0	gag	CAG	0	0	0	gag	CAG	0	0	0	gag	GTA	0	0	0	gag	AGA	0	0	0	gag	GAG	0	0	0
gag	GAT	0	0	0	gag	CAG	0	0	0	gag	AGA	0	0	0	gag	AAA	0	0	0	gag	AAA	0	0	0	gag	GAT	0	0	0	gag	GAT	0	0	0	gag	AAA	0	0	0	gag	GCC	0	0	0	gag	GTA	0	0	0
gag	GTA	0	0	0	gag	GAG	0	0	0	gag	CAA	0	0	0	gag	AAT	0	0	0	gag	AAT	0	0	0	gag	GTA	0	0	0	gag	GTA	0	0	0	gag	AAT	0	0	0	gag	GAG	0	0	0	gag	AAA	0	0	0
gag	AAA	0	0	0	gag	GTA	0	0	0	gag	GGA	0	0	0	gag	TGG	0	3	1	gag	TGG	0	4	0	gag	AAA	0	0	0	gag	AAA	0	0	0	gag	TGG	0	1	0	gag	CAA	0	0	0	gag	AAT	0	0	0
gag	AAT	0	0	0	gag	AAA	0	0	0	gag	CCA	0	0	0	gag	ATG	0	0	0	gag	ATG	0	0	0	gag	AAT	0	0	0	gag	AAT	0	0	0	gag	ATG	0	0	0	gag	GCT	0	0	0	gag	TGG	2	7	1
gag	TGG	0	0	1	gag	AAT	0	0	0	gag	AAG	0	0	0	gag	ACA	0	0	0	gag	ACA	0	0	0	gag	TGG	2	3	2	gag	TGG	1	8	1	gag	ACA	0	0	0	gag	TCA	0	0	0	gag	ATG	0	0	0
gag	ATG	0	0	0	gag	TGG	0	3	0	gag	GAA	0	0	0	gag	GAA	0	0	0	gag	GAA	0	0	0	gag	ATG	0	0	0	gag	ATG	0	0	0	gag	GAA	0	0	0	gag	CAA	0	0	0	gag	ACA	0	0	0
gag	ACA	0	0	0	gag	ATG	0	0	0	gag	CCC	0	0	0	gag	ACC	0	0	0	gag	ACC	0	0	0	gag	ACA	0	0	0	gag	ACA	0	0	0	gag	ACA	0	0	0	gag	GAG	0	0	0	gag	GAA	0	0	0
gag	GAA	0	0	0	gag	ACA	0	0	0	gag	TTT	0	0	0	gag	TTG	0	0	0	gag	TTG	0	0	0	gag	GAA	0	0	0	gag	GAG	0	0	0	gag	TTA	0	0	0	gag	GTA	0	0	0	gag	ACC	0	0	0
gag	ACC	0	0	0	gag	GAA	0	0	0	gag	AGA	0	0	0	gag	TTG	0	0	0	gag	CTG	0	0	0	gag	ACC	0	0	0	gag	ACC	0	0	0	gag	TTG	0	0	0	gag	AAA	0	0	0	gag	TTG	0	0	0
gag	TTG	0	0	0	gag	ACC	0	0	0	gag	GAT	0	0	0	gag	GTC	0	0	0	gag	GTC	0	0	0	gag	TTG	0	0	0	gag	TTG	0	0	0	gag	GTC	0	0	0	gag	AAT	0	0	0	gag	TTG	0	0	0
gag	TTG	0	0	0	gag	TTG	0	0	0	gag	TAT	0	0	0	gag	CAA	0	0	0	gag	CAA	0	0	0	gag	TTG	0	0	0	gag	TTA	0	0	0	gag	CAA	0	0	0	gag	TGG	0	2	0	gag	GTC	0	0	0
gag	GTC	0	0	0	gag	TTG	0	0	0	gag	GTA	0	0	0	gag	AAT	0	0	0	gag	AAT	0	0	0	gag	GTC	0	0	0	gag	GTC	0	0	0	gag	AAT	0	0	0	gag	ATG	0	0	0	gag	CAA	0	0	0
gag	CAG	0	0	0	gag	GTC	0	0	0	gag	GAC	0	0	0	gag	GCG	0	0	0	gag	GCG	0	0	0	gag	CAA	0	0	0	gag	CAA	0	0	0	gag	GCA	0	0	0	gag	ACA	0	0	0	gag	AAT	0	0	0
gag	AAT	0	0	0	gag	CAA	0	0	0	gag	CGG	0	0	0	gag	AAC	0	0	0	gag	AAC	0	0	0	gag	AAT	0	0	0	gag	AAT	0	0	0	gag	AAT	0	0	0	gag	GAG	0	0	0	gag	GCG	0	0	0
gag	GCG	0	0	0	gag	AAT	0	0	0	gag	TTC	0	0	0	gag	CCA	0	0	0	gag	CCA	0	0	0	gag	GCA	0	0	0	gag	GCG	0	0	0	gag	CCA	0	0	0	gag	ACC	0	0	0	gag	AAC	0	0	0
gag	AAT	0	0	0	gag	TCG	0	0	0	gag	TAT	0	0	0	gag	GAT	0	0	0	gag	GAT	0	0	0	gag	AAC	0	0	0	gag	AAC	0	0	0	gag	GAT	0	0	0	gag	TTA	0	0	0	gag	CCA	0	0	0
gag	CCA	0	0	0	gag	AAC	0	0	0	gag	AAA	0	0	0	gag	TGT	0	0	0	gag	TGT	0	0	0	gag	CCA	0	0	0	gag	CCA	0	0	0	gag	TGT	0	0	0	gag	TTG	0	0	0	gag	GAT	0	0	0
gag	GAT	0	0	0	gag	CCA	0	0	0	gag	ACC	0	0	0	gag	AAG	0	0	0	gag	AAG	0	0	0	gag	GAT	0	0	0	gag	GAT	0	0	0	gag	AAG	0	0	0	gag	GTC	0	0	0	gag	TGT	0	0	0
gag	TGT	0	0	0	gag	GAT	0	0	0	gag	CTA	0	0	0	gag	ACC	0	0	0	gag	ACC	0	0	0	gag	TGT	0	0	0	gag	TGC	0	0	0	gag	ACT	0	0	0	gag	CAA	0	0	0	gag	AAA	0	0	0
gag	AAA	0	0	0	gag	TGT	0	0	0	gag	AGA	0	0	0	gag	ATT	0	0	0	gag	ATT	0	0	0	gag	AAA	0	0	0	gag	AAG	0	0	0	gag	ATT	0	0	0	gag	AAT	0	0	0	gag	ACT	0	0	0
gag	ACT	0	0	0	gag	AAA	0	0	0	gag	GCC	0	0	0	gag	TTA	0	0	0	gag	CTA	0	0	0	gag	ACT	0	0	0	gag	ACT	0	0	0	gag	TTA	0	0	0	gag	TCG	0	0	0	gag	ATT	0	0	0
gag	ATT	0	0	0	gag	ACT	0	0	0	gag	GAG	0	0	0	gag	AAA	0	0	0	gag	AAA	0	0	0	gag	ATT	0	0	0	gag	ATT	0	0	0	gag	AAA	0	0	0	gag	AAC	0	0	0	gag	TTA	0	0	0
gag	TTA	0	0	0	gag	ATT	0	0	0	gag	CAA	0	0	0	gag	GCA	0	0	0	gag	GCA	0	0	0	gag	TTA	0	0	0	gag	TTG	0	0	0	gag	GCA	0	0	0	gag	CCA	0	0	0	gag	AAA	0	0	0
gag	AAA	0	0	0	gag	CTA	0	0	0	gag	GCT	0	0	0	gag	TTG	0	0	0	gag	TTG	0	0	0	gag	AAA	0	0	0	gag	AAA	0	0	0	gag	TTA	0	0	0	gag	GAT	0	0	0	gag	GCA	0	0	0
gag	GCA	0	0	0	gag	AAA	0	0	0	gag	TCA	0	0	0	gag	GGA	0	0	0	gag	GGA	0	0	0	gag	GCA	0	0	0	gag	GCA	0	0	0	gag	GGA	0	0	0	gag	TGT	0	0	0	gag	CTG	0	0	0
gag	TTG	0	0	0	gag	GCA	0	0	0	gag	CAG	0	0	0	gag	CCA	0	0	0	gag	CCA	0	0	0	gag	TTA	0	0	0	gag	CTG	0	0	0	gag	CCA	0	0	0	gag	AAG	0	0	0	gag	GGA	0	0	0
gag	GGA	0	0	0	gag	TTG	0	0	0	gag	GAG	0	0	0	gag	GCA	0	0	0	gag	GCA	0	0	0	gag	GGA	0	0	0	gag	GGA	0	0	0	gag	GCA	0	0	0	gag	ACA	0	0	0	gag	CCA	0	0	0
gag	CCA	0	0	0	gag	GGA	0	0	0	gag	GTA	0	0	0	gag	GCT	0	0	0	gag	GCC	0	0	0	gag	CCA	0	0	0	gag	CCA	0	0	0	gag	GCT	0	0	0	gag	ATC	0	0	0	gag	GCA	0	0	0
gag	GCA	0	0	0	gag	CCA	0	0	0	gag	AAA	0	0	0	gag	ACA	0	0	0	gag	ACA	0	0	0	gag	GCA	0	0	0	gag	GCA	0	0	0	gag	ACA	0	0	0	gag	TTA	0	0	0	gag	GCT	0	0	0
gag	GCT	0	0	0	gag	GGG	0	0	0	gag	AAT	0	0	0	gag	CTA	0	0	0	gag	CTA	0	0	0	gag	GCC	0	0	0	gag	GCT	0	0	0	gag	CTA	0	0	0	gag	AAA	0	0	0	gag	ACA	0	0	0
gag	ACA	0	0	0	gag	GCT	0	0	0	gag	TGG	0	4	2	gag	GAA	0	0	0	gag	GAA	0	0	0	gag	ACA	0	0	0	gag	ACA	0	0	0	gag	GAA	0	0	0	gag	GCA	0	0	0	gag	CTA	0	0	0
gag	CTA	0	0	0	gag	ACA	0	0	0	gag	ATG	0	0	0	gag	GAG	0	0	0	gag	GAA	0	0	0	gag	CTA	0	0	0	gag	CTA	0	0	0	gag	GAA	0	0	0	gag	TTG	0	0	0	gag	GAA	0	0	0
gag	GAA	0	0	0	gag	CTA	0	0	0	gag	ACA	0	0	0	gag	ATG	0	0	0	gag	ATG	0	0	0	gag	GAA	0	0	0	gag	GAA	0	0	0	gag	ATG	0	0	0	gag	GGA	0	0	0	gag	GAA	0	0	0
gag	GAA	0	0	0	gag	GAG	0	0	0	gag	GAA	0	0	0	gag	ATG	0	0	0	gag	ATG	0	0	0	gag	GAA	0	0	0	gag	GAG	0	0	0	gag	ATG	0	0	0	gag	CCA	0	0	0	gag	ATG	0	0	0
gag	ATG	0	0	0	gag	GAA	0	0	0	gag	ACC	0	0	0	gag	ACA	0	0	0	gag	ACA	0	0	0	gag	ATG	0	0	0	gag	ATG	0	0	0	gag	ACA	0	0	0	gag	GGA	0	0	0	gag	ATG	0	0	0
gag	ATG	0	0	0	gag	ATG	0	0	0	gag	TTG	0	0	0	gag	GCA	0	0	0	gag	GCA	0	0	0	gag	ATG	0	0	0	gag	ATG	0	0	0	gag	GCA	0	0	0	gag	GCA	0	0	0	gag	ACA	0	0	0
gag	ACA	0	0	0	gag	ATG	0	0	0	gag	TTA	0	0	0	gag	TGT	0	0	0	gag	TGT	0	0	0	gag	ACA	0	0	0	gag	TCA	0	0	0	gag	TGT	0	0	0	gag	ACA	0	0	0	gag	GCA	0	0	0
gag	GCA	0	0	0	gag	ACA	0	0	0	gag	GTC	0	0	0	gag	CAG	0	0	0	gag	CAG	0	0	0	gag	GCA	0	0	0	gag	GCA	0	0	0	gag	CAG	0	0	0	gag	CTA	0	0	0	gag	TGT	0	0	0
gag	TGT	0	0	0	gag	GCA	0	0	0	gag	CAG	0	0	0	gag	GGA	0	0	0	gag	GGA	0	0	0	gag	TGT	0	0	0	gag	TGC	0	0	0	gag	GGA	0	0	0	gag	GAA	0	0	0	gag	CAG	0	0	0
gag	CAG	0	0	0	gag	TGT	0	0	0	gag	AAT	0	0	0	gag	GTG	0	0	0	gag	GTG	0	0	0	gag	CAG	0	0	0	gag	CAA	0	0	0	gag	GTG	0	0	0	gag	GAA	0	0	0	gag	GGA	0	0	0
gag	GGA	0	0	0	gag	CAG	0	0	0	gag	GCG	0	0	0	gag	GGA	0	0	0	gag	GGA	0	0	0	gag	GGA	0	0	0	gag	GGA	0	0	0	gag	GGA	0	0	0	gag	ATG	0	0	0	gag	GTG	0	0	0
gag	GTG	0	0	0	gag	GGA	0	0	0	gag	AAC	0	0	0	gag	GGA	0	0	0	gag	GGA	0	0	0	gag	GTA	0	0	0	gag	GTG	0	0	0	gag	GGA	0	0	0	gag	ATG	0	0	0	gag	GGA	0	0	0
gag	GGA	0	0	0	gag	GTG	0	0	0	gag	CCA	0	0	0	gag	CCA	0	0	0	gag	CCC	0	0	0	gag	GGA	0	0	0	gag	GGG	0	0	0	gag	CCT	0	0	0	gag	ACA	0	0	0	gag	GGA	0	0	0
gag	GGA	0	0	0	gag	GGA	0	0	0	gag	GAT	0	0	0	gag	GGC	0	0	0	gag	GGC	0	0	0	gag	GGA	0	0	0	gag	GGG	0	0	0	gag	GGC	0	0	0	gag	GCA	0	0	0	gag	CCT	0	0	0
gag	CCC	0	0	0	gag	GGA	0	0	0	gag	TGT	0	0	0	gag	CAT	0	0	0	gag	CAT	0	0	0	gag	CCT	0	0	0	gag	CCC	0	0	0	gag	CAT	0	0	0	gag	TGT	0	0	0	gag	GGC	0	0	0
gag	GGC	0	0	0	gag	CCC	0	0	0	gag	AAG	0	0	0	gag	AAA	0	0	0	gag	AAA	0	0	0	gag	GGC	0	0	0	gag	GGC	0	0	0	gag	AAA	0	0	0	gag	CAG	0	0	0	gag	CAT	0	0	0
gag	CAC	0	0	0	gag	GGC	0	0	0	gag	ACC	0	0	0	gag	GCA	0	0	0	gag	GCA	0	0	0	gag	CAT	0	0	0	gag	CAT	0	0	0	gag	GCA	0	0	0	gag	GGA	0	0	0	gag	AAA	0	0	0
gag	AAA	0	0	0	gag	CAT	0	0	0	gag	ATT	0	0	0	gag	AGA	0	0	0	gag	AGA	0	0	0	gag	AAA	0	0	0	gag	AAA	0	0	0	gag	AGA	0	0	0	gag	GTG	0	0	0	gag	GCA	0	0	0
gag	GCA	0	0	0	gag	AAA	0	0	0	gag	TTA	0	0	0	gag	GTT	0	0	0	gag	GTG	0	0	0	gag	GCA	0	0	0	gag	GCA	0	0	0	gag	GTT	0	0	0	gag	GGG	0	0	0	gag	AGA	0	0	0
gag	AGG	0	0	0	gag	GCA	0	0	0	gag	AAA	0	0	0	gag	CTG	0	0	0	gag	TTG	0	0	0	gag	AGA	0	0	0	gag	AGA	0	0	0	gag	TTG	0	0	0	gag	GGA	0	0	0	gag	GTT	0	0	0
gag	ATC	0	0	0	gag	AGG	0	0	0	gag	GCA	0	0	0	gag	GCA	0	0	0	gag	GCT	0	0	0	gag	GTT	0	0	0	gag	GTT	0	0	0	gag	GCT	0	0	0	gag	CCC	0	0	0	gag	TTG	0	0	0
gag	TTG	0	0	0	gag	GTT	0	0	0	gag	TTA	0	0	0	gag	GAA	0	0	0	gag	GAA	0	0	0	gag	TTG	0	0	0	gag	TTG	0	0	0	gag	GAA	0	0	0	gag	GGA	0	0	0	gag	GCA	0	0	0
gag	GCG	0	0	0	gag	TTG	0	0	0	gag	GGA	0	0	0	gag	GCC	0	0	0	gag	GCA	0	0	0	gag	GCT	0	0	0	gag	GCT	0	0	0	gag	GCA	0	0	0	gag	CAT	0	0	0	gag	GAG	0	0	0
gag	GAA	0	0	0	gag	GCG	0	0	0	gag	CCA	0	0	0	gag	ATG	0	0	0	gag	ATG	0	0	0	gag	GAA	0	0	0	gag	GAA	0	0	0	gag	ATG	0	0	0	gag	AAA	0	0	0	gag	GCA	0	0	0
gag	GCA	0	0	0	gag	GAA	0	0	0	gag	GGA	0	0	0	gag	AGT	0	0	0	gag	AGC	0	0	0	gag	GCA	0	0	0	gag	GCA	0	0	0	gag	AGC	0	0	0	gag	GCA	0	0	0	gag	ATG	0	0	0
gag	ATG	0	0	0	gag	GCG	0	0	0	gag	GCC	0	0	0	gag	CAA	0	0	0	gag	CAA	0	0	0	gag	ATG	0	0	0	gag	ATG	0	0	0	gag	CAA	0	0	0	gag	AGA	0	0	0	gag	AGC	0	0	0
gag	AGC	0	0	0	gag	ATG	0	0	0	gag	ACA	0	0	0	gag	GTA	0	0	0	gag	GTA	0	0	0	gag	AGC	0	0	0	gag	GGC	0	0	0	gag	GTA	0	0	0	gag	GTT	0	0	0	gag	CAA	0	0	0
gag	CAA	0	0	0	gag	AGC	0	0	0	gag	CTA	0	0	0	gag	ACA	0	0	0	gag	ACA	0	0	0	gag	CAG	0	0	0	gag	CAA	0	0	0	gag	ACG	0	0	0	gag	TTG	0	0	0	gag	GTA	0	0	0
gag	GTA	0	0	0	gag	CAA	0	0	0	gag	GAA	0	0	0	gag	AGT	0	0	0	gag	AAT	0	0	0	gag	GTA	0	0	0	gag	ATA	0	0	0	gag	AGT	0	0	0	gag	GCT	0	0	0	gag	ACA	0	0	0
gag	AAT	0	0	0	gag	GTA	0	0	0	gag	GAG	0	0	0	gag	CCA	0	0	0	gag	TCT	0	0	0	gag	ACA	0	0	0	gag	ACA	0	0	0	gag	CCA	0	0	0	gag	GAA	0	0	0	gag	AAT	0	0	0
gag	CCA	0	0	0	gag	AAT	0	0	0	gag	ATG	0	0	0	gag	ACC	0	0	0	gag	AAA	0	0	0	gag	AAT	0	0	0	gag	AAT	0	0	0	gag	GCT	0	0	0	gag	GCA	0	0	0	gag	ACA	0	0	0
gag	CCT	0	0	0	gag	CCA	0	0	0	gag	ATG	0	0	0	gag	ATA	0	0	0	gag	ATA	0	0	0	gag	ACT	0	0	0	gag	ACA	0	0	0	gag	ACC	0	0	0	gag	ATG	0	0	0	gag	GCT	0	0	0
gag	ACC	0	0	0	gag	CCT	0	0	0	gag	ACA	0	0	0	gag	ATG	0	0	0	gag	ATG	0	0	0	gag	GCA	0	0	0	gag	GCT	0	0	0	gag	ATA	0	0	0	gag	AGC	0	0	0	gag	ACC	0	0	0
gag	ATA	0	0	0	gag	ACC	0	0	0	gag	GCA	0	0	0	gag	ATG	0	0	0	gag	ATG	0	0	0	gag	ACT	0	0	0	gag	ACC	0	0	0	gag	ATG	0	0	0	gag	CAA	0	0	0	gag	ATA	0	0	0
gag	ATG	0	0	0	gag	ATA	0	0	0	gag	TGT	0	0	0	gag	CAG	0	0	0	gag	CAG	0	0	0	gag	GCT	0	0	0	gag	ATA	0	0	0	gag	ATG	0	0	0	gag	GTA	0	0	0	gag	ATG	0	0	0
gag	ATG	0	0	0	gag	ATG	0	0	0	gag	CAG	0	0	0	gag	AAA	0	0	0	gag	AGA	0	0	0	gag	GTA	0	0	0	gag	ATG	0	0	0	gag	CAG	0	0	0	gag	AAT	0	0	0	gag	ATG	0	0	0
gag	CAG	0	0	0	gag	ATG	0	0	0	gag	GGA	0	0	0	gag	GGC	0	0	0	gag	GGC	0	0	0	gag	ATG	0	0	0	gag	ATG	0	0	0	gag	AAA	0	0	0	gag	TCA	0	0	0	gag	CAG	0	0	0
gag	GGA	0	0	0	gag	CAG	0	0	0	gag	GTG	0	0	0	gag	AAT	0	0	0	gag	AAT	0	0	0	gag	ATG	0	0	0	gag	CAG	0	0	0	gag	GGC	0	0	0	gag	GCC	0	0	0	gag	AAA	0	0	0
gag	GGC	0	0	0	gag	AGG	0	0	0	gag	GGG	0	0	0	gag	TTT	0	0	0	gag	TTT	0	0	0	gag	CAA	0	0	0	gag	AGG	0	0	0	gag	AAT	0	0	0	gag	ACC	0	0	0	gag	GGC	0	0	0
gag	GGC	0	0	0	gag	GGC	0	0	0	gag	GGA	0	0	0	gag	AGG	0	0	0	gag	AAG	0	0	0	gag	AAA	0	0	0	gag	GGC	0	0	0	gag	TTT	0	0	0	gag	ATA	0	0	0	gag	AAT	0	0	0
gag	AAC	0	0	0	gag	AAT	0	0	0	gag	CCC	0	0	0	gag	AAC	0	0	0	gag	AAC	0	0	0	gag	GGC	0	0	0	gag	AAT	0	0	0	gag	AGG	0	0	0	gag	ATG	0	0	0	gag	TTT	0	0	0
gag	TTT	0	0	0	gag	TTT	0	0	0	gag	GGC	0	0	0	gag	ACA	0	0	0	gag	CAA	0	0	0	gag	AAT	0	0	0	gag	TTT	0	0	0	gag	AAC	0	0	0	gag	ATG	0	0	0	gag	AGG	0	0	0
gag	AGG	0	0	0	gag	AAG	0	0	0	gag	CAT	0	0	0	gag	AGA	0	0	0	gag	AGA	0	0	0	gag	TTT	0	0	0	gag	AAG	0	0	0	gag	CAA	0	0	0	gag	CAG	0	0	0	gag	AAT	0	0	0
gag	AAA	0	0	0	gag	AAC	0	0	0	gag	AAA	0	0	0	gag	AAG	0	0	0	gag	AAG	0	0	0	gag	AGG	0	0	0	gag	AAC	0	0	0	gag	AAA	0	0	0	gag	AGG	0	0	0	gag	CAA	0	0	0
gag	CAA	0	0	0	gag	CAA	0	0	0	gag	GCA	0	0	0	gag	ATG	0	0	0	gag	ACT	0	0	0	gag	GGC	0	0	0	gag	CAA	0	0	0	gag	AGG	0	0	0	gag	GGC	0	0	0	gag	AGA	0	0	0
gag	AGA	0	0	0	gag	AGA	0	0	0	gag	AGA	0	0	0	gag	GTC	0	0	0	gag	ATT	0	0	0	gag	CAA	0	0	0	gag	AAA	0	0	0	gag	ACT	0	0	0	gag	AAC	0	0	0	gag	AAG	0	0	0
gag	AAA	0	0	0	gag	AAG	0	0	0	gag	GTT	0	0	0	gag	AAG	0	0	0	gag	AAG	0	0	0	gag	AGA	0	0	0	gag	AGG	0	0	0	gag	ATT	0	0	0	gag	TTT	0	0	0	gag	ATG	0	0	0
gag	ATT	0	0	0	gag	ATT	0	0	0	gag	TTG	0	0	0	gag	TGT	0	0	0	gag	TGT	0	0	0	gag	AAG	0	0	0	gag	ACT	0	0	0	gag	AAA	0	0	0	gag	AAG	0	0	0	gag	GTT	0	0	0
gag	GTT	0	0	0	gag	GTT	0	0	0	gag	GCC	0	0	0	gag	TTC	0	0	0	gag	TTC	0	0	0	gag	CCT	0	0	0	gag	GTT	0	0	0	gag	TGC	0	0	0	gag	AAC	0	0	0	gag	AAG	0	0	0
gag	AAG	0	0	0	gag	AAG	0	0	0	gag	GAA	0	0	0	gag	AAT	0	0	0	gag	AAT	0	0	0	gag	GTT	0	0	0	gag	AAG	0	0	0	gag	TTC	0	0	0	gag	CAA	0	0	0	gag	TGT	0	0	0
gag	TGT	0	0	0	gag	TGT	0	0	0	gag	GCA	0	0	0	gag	TGT	0	0	0	gag	TGT	0	0	0	gag	AAG	0	0	0	gag	TGT	0	0	0	gag	AAT	0	0	0	gag	AGA	0	0	0	gag	TTC	0	0	0
gag	TTC	0	0	0	gag	TTC	0	0	0	gag	ATG	0	0	0	gag	GGC	0	0	0	gag	GGC	0	0	0	gag	TGT	0	0	0	gag	TTC	0	0	0	gag	TGT	0	0	0	gag	AAG	0	0	0	gag	AAT	0	0	0
gag	AAT	0	0	0	gag	AAC	0	0	0	gag	AGT	0	0	0	gag	AAA	0	0	0	gag	AAG	0	0	0	gag	TTC	0	0	0	gag	AAT	0	0	0	gag	GGT	0	0	0	gag	ATT	0	0	0	gag	TGT	0	0	0
gag	TGT	0	0	0	gag	TGT	0	0	0	gag	CAG	0	0	0	gag	GAA	0	0	0	gag	GAA	0	0	0	gag	AAT	0	0	0	gag	TGT	0	0	0	gag	AAA	0	0	0	gag	GTT	0	0	0	gag	GGC	0	0	0
gag	GGC	0	0	0	gag	GGC	0	0	0	gag	GTA	0	0	0	gag	GGG	0	0	0	gag	GGA	0	0	0	gag	TGT	0	0	0	gag	GGC	0	0	0	gag	GAA	0	0	0	gag	AAG	0	0	0	gag	AAA	0	0	0
gag	AAA	0	0	0	gag	AAA	0	0	0	gag	ACA	0	0	0	gag	CAC	0	0	0	gag	CAC	0	0	0	gag	GGC	0	0	0	gag	AAG	0	0	0	gag	GGG	0	0	0	gag	TGT	0	0	0	gag	GAA	0	0	0
gag	GAA	0	0	0	gag	GAA	0	0	0	gag	AAT	0	0	0	gag	ATA	0	0	0	gag	TTA	0	0	0	gag	AAA	0	0	0	gag	GAA	0	0	0	gag	CAC	0	0	0	gag	TTC	0	0	0	gag	GGG	0	0	0
gag	GGG	0	0	0	gag	GGA	0	0	0	gag	CCA	0	0	0	gag	GCC	0	0	0	gag	GCC	0	0	0	gag	GAA	0	0	0	gag	GGA	0	0	0	gag	CTA	0	0	0	gag	AAT	0	0	0	gag	CAC	0	0	0
gag	CAC	0	0	0	gag	CAC	0	0	0	gag	ACT	0	0	0	gag	AGA	0	0	0	gag	AGA	0	0	0	gag	GGG	0	0	0	gag	CAC	0	0	0	gag	GCC	0	0	0	gag	TGT	0	0	0	gag	ATA	0	0	0
gag	ATA	0	0	0	gag	ATA	0	0	0	gag	AAT	0	0	0	gag	AAT	0	0	0	gag	AAT	0	0	0	gag	CAC	0	0	0	gag	ATA	0	0	0	gag	AAA	0	0	0	gag	GGC	0	0	0	gag	GCT	0	0	0
gag	GCC	0	0	0	gag	GCC	0	0	0	gag	GTA	0	0	0	gag	TGC	0	0	0	gag	TGC	0	0	0	gag	ATA	0	0	0	gag	GCC	0	0	0	gag	AAT	0	0	0	gag	AAA	0	0	0	gag	AGA	0	0	0
gag	AAA	0	0	0	gag	AGA	0	0	0	gag	ATG	0	0	0	gag	AAG	0	0	0	gag	AGA	0	0	0	gag	GCC	0	0	0	gag	AGA	0	0	0	gag	TGC	0	0	0	gag	GAT	0	0	0	gag	AAT	0	0	0
gag	AAT	0	0	0	gag	AAC	0	0	0	gag	ATG	0	0	0	gag	GCC	0	0	0	gag	GCC	0	0	0	gag	AGA	0	0	0	gag	AAT	0	0	0	gag	AGG	0	0	0	gag	GGG	0	0	0	gag	TGC	0	0	0
gag	TGC	0	0	0	gag	TGC	0	0	0	gag	CAG	0	0	0	gag	CCT	0	0	0	gag	CCT	0	0	0	gag	AAT	0	0	0	gag	TGC	0	0	0	gag	GCC	0	0	0	gag	CAT	0	0	0	gag	AGG	0	0	0
gag	AGG	0	0	0	gag	AGG	0	0	0	gag	AGA	0	0	0	gag	AGG	0	0	0	gag	AGA	0	0	0	gag	TGC	0	0	0	gag	AGG	0	0	0	gag	CCT	0	0	0	gag	ATA	0	0	0	gag	GCC	0	0	0
gag	GCC	0	0	0	gag	GCC	0	0	0	gag	GGC	0	0	0	gag	AAA	0	0	0	gag	AAA	0	0	0	gag	AGG	0	0	0	gag	GCC	0	0	0	gag	AGG	0	0	0	gag	GCC	0	0	0	gag	CCT	0	0	0
gag	CCT	0	0	0	gag	CCT	0	0	0	gag	AAT	0	0	0	gag	AGA	0	0	0	gag	AAG	0	0	0	gag	GCC	0	0	0	gag	CCT	0	0	0	gag	AAA	0	0	0	gag	AGA	0	0	0	gag	AGG	0	0	0
gag	AGG	0	0	0	gag	AGG	0	0	0	gag	TTT	0	0	0	gag	GGC	0	0	0	gag	GGC	0	0	0	gag	CCT	0	0	0	gag	AGG	0	0	0	gag	AAG	0	0	0	gag	AAT	0	0	0	gag	AAA	0	0	0
gag	AAA	0	0	0	gag	AAA	0	0	0	gag	AAG	0	0	0	gag	TGT	0	0	0	gag	TGT	0	0	0	gag	AGG	0	0	0	gag	AAA	0	0	0	gag	GGC	0	0	0	gag	TGC	0	0	0	gag	AGG	0	0	0
gag	AAG	0	0	0	gag	AAG	0	0	0	gag	AAT	0	0	0	gag	TGG	1	3	0	gag	TGG	1	1	0	gag	AAA	0	0	0	gag	AAA	0	0	0	gag	TGT	0	0	0	gag	AGG	0	0	0	gag	GGC	0	0	0
gag	GGC	0	0	0	gag	GGC	0	0	0	gag	CAA	0	0	0	gag	AAG	0	0	0	gag	AAA	0	0	0	gag	AGG	0	0	0	gag	GGC	0	0	0	gag	TGG	0	2	1	gag	GCC	0	0	0	gag	TGT	0	0	0
gag	TGT	0	0	0	gag	TGT	0	0	0	gag	AGA	0	0	0	gag	TGT	0	0	0	gag	TGT	0	0	0	gag	GGC	0	0	0	gag	TGT	0	0	0	gag	AAA	0	0	0	gag	CCT	0	0	0	gag	TGG	2	3	1
gag	TGG	0	0	1	gag	TGG	0	3	1	gag	AAG	0	0	0	gag	GGA	0	0	0	gag	GGA	0	0	0	gag	TGT	0	0	0	gag	TGG	1	3	0	gag	TGT	0	0	0	gag	AGG	0	0	0	gag	AAA	0	0	0
gag	AAA	0	0	0	gag	AAA	0	0	0	gag	ACT	0	0	0	gag	AAG	0	0	0	gag	AGG	0	0	0	gag	TGG	0	4	3	gag	AAA	0	0	0	gag	GGA	0	0	0	gag	AAA	0	0	0	gag	TGT	0	0	0
gag	TGT	0	0	0	gag	TGT	0	0	0	gag	GTT	0	0	0	gag	GAA	0	0	0	gag	GAA	0	0	0	gag	AAA	0	0	0	gag	TGT	0	0	0	gag	AAG	0	0	0	gag	AAG	0	0	0	gag	GGA	0	0	0
gag	GGA	0	0	0	gag	GGA	0	0	0	gag	AAG	0	0	0	gag	GGA	0	0	0	gag	GGA	0	0	0	gag	TGT	0	0	0	gag	GGA	0	0	0	gag	GAA	0	0	0	gag	GGC	0	0	0	gag	AAG	0	0	0
gag	CAG	0	0	0	gag	AAG	0	0	0	gag	TGT	0	0	0	gag	CAC	0	0	0	gag	CAC	0	0	0	gag	GGG	0	0	0	gag	AGG	0	0	0	gag	GGA	0	0	0	gag	TGT	0	0	0	gag	GAA	0	0	0
gag	GAA	0	0	0	gag	GAG	0	0	0	gag	TTC	0	0	0	gag	CAA	0	0	0	gag	CAA	0	0	0	gag	AAG	0	0	0	gag	GAA	0	0	0	gag	CAT	0	0	0	gag	TGG	0	4	0	gag	GGA	0	0	0
gag	GGA	0	0	0	gag	GGA	0	0	0	gag	AAT	0	0	0	gag	ATG	0	0	0	gag	ATG	0	0	0	gag	GAA	0	0	0	gag	GGA	0	0	0	gag	CAA	0	0	0	gag	AAA	0	0	0	gag	CAC	0	0	0
gag	CAC	0	0	0	gag	CAT	0	0	0	gag	TGT	0	0	0	gag	AAG	0	0	0	gag	AAA	0	0	0	gag	GGA	0	0	0	gag	CAC	0	0	0	gag	ATG	0	0	0	gag	TGT	0	0	0	gag	CAA	0	0	0
gag	CAA	0	0	0	gag	CAA	0	0	0	gag	GGC	0	0	0	gag	GAT	0	0	0	gag	GAT	0	0	0	gag	CAT	0	0	0	gag	CAA	0	0	0	gag	AAA	0	0	0	gag	GGA	0	0	0	gag	ATG	0	0	0
gag	ATG	0	0	0	gag	ATG	0	0	0	gag	AAA	0	0	0	gag	TGC	0	0	0	gag	TGT	0	0	0	gag	CAA	0	0	0	gag	ATG	0	0	0	gag	GAT	0	0	0	gag	AAG	0	0	0	gag	AAA	0	0	0
gag	AAA	0	0	0	gag	AAA	0	0	0	gag	GAA	0	0	0	gag	ACT	0	0	0	gag	ACT	0	0	0	gag	ATG	0	0	0	gag	AAA	0	0	0	gag	TGT	0	0	0	gag	GAA	0	0	0	gag	GAA	0	0	0
gag	GAT	0	0	0	gag	GAG	0	0	0	gag	GGA	0	0	0	gag	GAA	0	0	0	gag	AAT	0	0	0	gag	AAA	0	0	0	gag	GAT	0	0	0	gag	AAT	0	0	0	gag	GGA	0	0	0	gag	TGC	0	0	0
gag	TGT	0	0	0	gag	TGT	0	0	0	gag	CAC	0	0	0	gag	AGA	0	0	0	gag	GAG	0	0	0	gag	GAT	0	0	0	gag	TGC	0	0	0	gag	GAA	0	0	0	gag	CAC	0	0	0	gag	ACT	0	0	0
gag	ACT	0	0	0	gag	ACC	0	0	0	gag	ATA	0	0	0	gag	CAG	0	0	0	gag	AGA	0	0	0	gag	TGT	0	0	0	gag	ACT	0	0	0	gag	AGA	0	0	0	gag	CAA	0	0	0	gag	GAG	0	0	0
gag	GGA	0	0	0	gag	GAG	0	0	0	gag	GCC	0	0	0	gag	GCT	0	0	0	gag	CAG	0	0	0	gag	ACT	0	0	0	gag	GAG	0	0	0	gag	CAG	0	0	0	gag	ATG	0	0	0	gag	AGA	0	0	0
gag	AGA	0	0	0	gag	AGA	0	0	0	gag	AGA	0	0	0	gag	AAT	0	0	0	gag	GCT	0	0	0	gag	GAA	0	0	0	gag	AGA	0	0	0	gag	GCT	0	0	0	gag	AAA	0	0	0	gag	CAG	0	0	0
gag	CAG	0	0	0	gag	CAG	0	0	0	gag	AAT	0	0	0	gag	TTT	0	0	0	gag	AAT	0	0	0	gag	AGA	0	0	0	gag	CAG	0	0	0	gag	AAT	0	0	0	gag	GAT	0	0	0	gag	GCT	0	0	0
gag	GCT	0	0	0	gag	GCT	0	0	0	gag	TGC	0	0	0	gag	TTA	0	0	0	gag	TTT	0	0	0	gag	CAG	0	0	0	gag	GCT	0	0	0	gag	TTT	0	0	0	gag	TGT	0	0	0	gag	AAT	0	0	0
gag	AAT	0	0	0	gag	AAT	0	0	0	gag	AGG	0	0	0	gag	GGG	0	0	0	gag	TTA	0	0	0	gag	GCT	0	0	0	gag	AAT	0	0	0	gag	TTA	0	0	0	gag	ACT	0	0	0	gag	TTT	0	0	0
gag	TTT	0	0	0	gag	TTT	0	0	0	gag	GCC	0	0	0	gag	AAA	0	0	0	gag	GGG	0	0	0	gag	AAT	0	0	0	gag	TTT	0	0	0	gag	GGA	0	0	0	gag	GAG	0	0	0	gag	TTA	0	0	0
gag	TTA	0	0	0	gag	TTA	0	0	0	gag	CCT	0	0	0	gag	ATC	0	0	0	gag	AAG	0	0	0	gag	TTT	0	0	0	gag	TTA	0	0	0	gag	AAA	0	0	0	gag	AAA	0	0	0	gag	GGG	0	0	0
gag	GGG	0	0	0	gag	GGG	0	0	0	gag	AGA	0	0	0	gag	TGG	0	0	0	gag	ATC	0	0	0	gag	TTA	0	0	0	gag	GGG	0	0	0	gag	ATC	0	0	0	gag	CAG	0	0	0	gag	AAG	0	0	0
gag	AAA	0	0	0	gag	AAA	0	0	0	gag	AAA	0	0	0	gag	CCT	0	0	0	gag	TGG	0	1	0	gag	GGG	0	0	0	gag	AAA	0	0	0	gag	TGG	0	0	0	gag	GTT	0	0	0	gag	ATC	0	0	0
gag	CTC	0	0	0	gag	ATC	0	0	0	gag	AAG	0	0	0	gag	TCC	0	0	0	gag	CCT	0	0	0	gag	AAA	0	0	0	gag	ATC	0	0	0	gag	CCT	0	0	0	gag	AAT	0	0	0	gag	TGG	0	0	0
gag	TGG	0	0	0	gag	TGG	0	1	0	gag	GGC	0	0	0	gag	CAC	0	0	0	gag	CCC	0	0	0	gag	ATC	0	0	0	gag	TGG	0	0	0	gag	TCC	0	0	0	gag	TTT	0	0	0	gag	CCT	0	0	0
gag	CCT	0	0	0	gag	CCT	0	0	0	gag	TGT	0	0	0	gag	AAG	0	0	0	gag	TAC	0	0	0	gag	TGG	0	1	0	gag	CCT	0	0	0	gag	CAC	0	0	0	gag	TTA	0	0	0	gag	TCC	0	0	0
gag	TCC	0	0	0	gag	TCC	0	0	0	gag	TGG	0	1	1	gag	GGG	0	0	0	gag	AAG	0	0	0	gag	CCT	0	0	0	gag	TCC	0	0	0	gag	AAG	0	0	0	gag	GGG	0	0	0	gag	TCC	0	0	0
gag	CAC	0	0	0	gag	CAC	0	0	0	gag	AAA	0	0	0	gag	AGG	0	0	0	gag	GAG	0	0	0	gag	TCC	0	0	0	gag	CAC	0	0	0	gag	GGG	0	0	0	gag	AAA	0	0	0	gag	AAA	0	0	0
gag	AAG	0	0	0	gag	AAG	0	0	0	gag	TGT	0	0	0	gag	CCA	0	0	0	gag	AGG	0	0	0	gag	CAC	0	0	0	gag	AAG	0	0	0	gag	AGG	0	0	0	gag	ATC	0	0	0	gag	GGA	0	0	0
gag	GGG	0	0	0	gag	GGG	0	0	0	gag	GGA	0	0	0	gag	GGG	0	0	0	gag	CCA	0	0	0	gag	AAG	0	0	0	gag	GGG	0	0	0	gag	CCA	0	0	0	gag	TGG	0	0	0	gag	AGG	0	0	0
gag	AGG	0	0	0	gag	AGG	0	0	0	gag	AAG	0	0	0	gag	AAT	0	0	0	gag	GGA	0	0	0	gag	GGG	0	0	0	gag	AGG	0	0	0	gag	GGG	0	0	0	gag	CCT	0	0	0	gag	CCA	0	0	0
gag	CCA	0	0	0	gag	CCA	0	0	0	gag	GAA	0	0	0	gag	TTC	0	0	0	gag	AAT	0	0	0	gag	AGG	0	0	0	gag	CCA	0	0	0	gag	AAT	0	0	0	gag	TCC	0	0	0	gag	GGG	0	0	0
gag	GGG	0	0	0	gag	GGA	0	0	0	gag	GGA	0	0	0	gag	CTC	0	0	0	gag	TTT	0	0	0	gag	CCA	0	0	0	gag	GGG	0	0	0	gag	TTT	0	0	0	gag	CAC	0	0	0	gag	AAC	0	0	0
gag	AAT	0	0	0	gag	AAT	0	0	0	gag	CAC	0	0	0	gag	CAG	0	0	0	gag	CTC	0	0	0	gag	GGG	0	0	0	gag	AAT	0	0	0	gag	CTT	0	0	0	gag	AAA	0	0	0	gag	TTC	0	0	0
gag	TTT	0	0	0	gag	TTC	0	0	0	gag	CAA	0	0	0	gag	AGC	0	0	0	gag	CAG	0	0	0	gag	AAT	0	0	0	gag	TTC	0	0	0	gag	CAG	0	0	0	gag	GGG	0	0	0	gag	CTT	0	0	0
gag	CTT	0	0	0	gag	CCT	0	0	0	gag	ATG	0	0	0	gag	AGA	0	0	0	gag	AGC	0	0	0	gag	TTC	0	0	0	gag	CTT	0	0	0	gag	AGC	0	0	0	gag	AGG	0	0	0	gag	CAG	0	0	0
gag	CAG	0	0	0	gag	CAG	0	0	0	gag	AAA	0	0	0	gag	CCA	0	0	0	gag	AGA	0	0	0	gag	CTT	0	0	0	gag	CAG	0	0	0	gag	AGA	0	0	0	gag	CCA	0	0	0	gag	AGC	0	0	0
gag	AGC	0	0	0	gag	GGC	0	0	0	gag	GAT	0	0	0	gag	GAG	0	0	0	gag	CCG	0	0	0	gag	CAA	0	0	0	gag	AGC	0	0	0	gag	CCA	0	0	0	gag	GGG	0	0	0	gag	AGA	0	0	0
gag	AGA	0	0	0	gag	AGA	0	0	0	gag	TGT	0	0	0	gag	CAG	0	0	0	gag	GAG	0	0	0	gag	AGC	0	0	0	gag	AGA	0	0	0	gag	GAG	0	0	0	gag	AAT	0	0	0	gag	CCA	0	0	0
gag	CCA	0	0	0	gag	CTA	0	0	0	gag	ACT	0	0	0	gag	AGC	0	0	0	gag	CCA	0	0	0	gag	AGA	0	0	0	gag	CCA	0	0	0	gag	CCA	0	0	0	gag	TTT	0	0	0	gag	GAG	0	0	0
gag	GAG	0	0	0	gag	GAG	0	0	0	gag	GAG	0	0	0	gag	AGA	0	0	0	gag	TCA	0	0	0	gag	CCA	0	0	0	gag	GAG	0	0	0	gag	ACA	0	0	0	gag	CTT	0	0	0	gag	CCA	0	0	0
gag	CCA	0	0	0	gag	CCA	0	0	0	gag	AGA	0	0	0	gag	CTA	0	0	0	gag	GCC	0	0	0	gag	GAG	0	0	0	gag	CCA	0	0	0	gag	GCC	0	0	0	gag	CAG	0	0	0	gag	ACA	0	0	0
gag	TCA	0	0	0	gag	ACA	0	0	0	gag	CAG	0	0	0	gag	GAG	0	0	0	gag	CCA	0	0	0	gag	CCA	0	0	0	gag	ACA	0	0	0	gag	CCA	0	0	0	gag	AGC	0	0	0	gag	GCC	0	0	0
gag	GCC	0	0	0	gag	GCC	0	0	0	gag	GCT	0	0	0	gag	CCA	0	0	0	gag	CCA	0	0	0	gag	ACA	0	0	0	gag	GCC	0	0	0	gag	CCA	0	0	0	gag	AGA	0	0	0	gag	CCA	0	0	0
gag	CCA	0	0	0	gag	CCA	0	0	0	gag	AAT	0	0	0	gag	ACA	0	0	0	gag	GAA	0	0	0	gag	GCC	0	0	0	gag	CCA	0	0	0	gag	GNN	0	0	0	gag	CCA	0	0	0	gag	CTA	0	0	0
gag	CCA	0	0	0	gag	CCA	0	0	0	gag	TTT	0	0	0	gag	GCC	0	0	0	gag	GAA	0	0	0	gag	CCA	0	0	0	gag	CCA	0	0	0	gag	NNN	0	0	0	gag	GAG	0	0	0	gag	GAG	0	0	0
gag	GNN	0	0	0	gag	GNN	0	0	0	gag	TTA	0	0	0	gag	CCA	0	0	0	gag	AGC	0	0	0	gag	CCA	0	0	0	gag	GAG	0	0	0	gag	NNN	0	0	0	gag	CCA	0	0	0	gag	CCA	0	0	0
gag	NNN	0	0	0	gag	NNN	0	0	0	gag	GGG	0	0	0	gag	CCA	0	0	0	gag	TTC	0	0	0	gag	GAG	0	0	0	gag	GAG	0	0	0	gag	NNN	0	0	0	gag	ACA	0	0	0	gag	TCA	0	0	0
gag	NNN	0	0	0	gag	NNN	0	0	0	gag	AAA	0	0	0	gag	GNN	0	0	0	gag	AGG	0	0	0	gag	GAG	0	0	0	gag	AGC	0	0	0	gag	NNN	0	0	0	gag	GCC	0	0	0	gag	GCC	0	0	0
gag	NNN	0	0	0	gag	NNN	0	0	0	gag	ATC	0	0	0	gag	NNN	0	0	0	gag	TTT	0	0	0	gag	AGC	0	0	0	gag	TTC	0	0	0	gag	NNN	0	0	0	gag	CCA	0	0	0	gag	CCA	0	0	0
gag	NNN	0	0	0	gag	NNN	0	0	0	gag	TGG	0	1	0	gag	NNN	0	0	0	gag	GGG	0	0	0	gag	TTC	0	0	0	gag	AGG	0	0	0	gag	NNN	0	0	0	gag	CCA	0	0	0	gag	CCA	0	0	0
gag	NNN	0	0	0	gag	NNN	0	0	0	gag	CCT	0	0	0	gag	NNN	0	0	0	gag	GAG	0	0	0	gag	AGG	0	0	0	gag	TTT	0	0	0	gag	NAG	0	0	0	gag	GNN	0	0	0	gag	GAA	0	0	0
gag	NNN	0	0	0	gag	NNN	0	0	0	gag	TCC	0	0	0	gag	NNN	0	0	0	gag	GAG	0	0	0	gag	TTT	0	0	0	gag	GGG	0	0	0	gag	GAG	0	0	0	gag	NNN	0	0	0	gag	GAG	0	0	0
gag	NAG	0	0	0	gag	NAA	0	0	0	gag	CAC	0	0	0	gag	NNN	0	0	0	gag	ACA	0	0	0	gag	GGG	0	0	0	gag	GAG	0	0	0	gag	ATG	0	0	0	gag	NNN	0	0	0	gag	AGC	0	0	0
gag	GAG	0	0	0	gag	GAG	0	0	0	gag	AAG	0	0	0	gag	NNN	0	0	0	gag	ACA	0	0	0	gag	GAA	0	0	0	gag	GAG	0	0	0	gag	ACA	0	0	0	gag	NNN	0	0	0	gag	TTC	0	0	0
gag	ACA	0	0	0	gag	ATA	0	0	0	gag	GGA	0	0	0	gag	NAA	0	0	0	gag	ACT	0	0	0	gag	GAA	0	0	0	gag	ATA	0	0	0	gag	ACT	0	0	0	gag	NNN	0	0	0	gag	AGG	0	0	0
gag	ACA	0	0	0	gag	ACA	0	0	0	gag	AGG	0	0	0	gag	GAG	0	0	0	gag	CCC	0	0	0	gag	ACA	0	0	0	gag	AAA	0	0	0	gag	CCC	0	0	0	gag	NNN	0	0	0	gag	TTT	0	0	0
gag	ACT	0	0	0	gag	ACT	0	0	0	gag	CCA	0	0	0	gag	ACA	0	0	0	gag	TCC	0	0	0	gag	GCA	0	0	0	gag	ACT	0	0	0	gag	TCT	0	0	0	gag	NNN	0	0	0	gag	GGG	0	0	0
gag	CCC	0	0	0	gag	CCC	0	0	0	gag	GGG	0	0	0	gag	ACA	0	0	0	gag	CAN	0	0	0	gag	ACT	0	0	0	gag	CCC	0	0	0	gag	CAG	0	0	0	gag	NAA	0	0	0	gag	GAG	0	0	0
gag	TCT	0	0	0	gag	TCT	0	0	0	gag	AAT	0	0	0	gag	AAT	0	0	0	gag	NNN	0	0	0	gag	CCC	0	0	0	gag	CCT	0	0	0	gag	AAG	0	0	0	gag	GAG	0	0	0	gag	GAG	0	0	0
gag	CAN	0	0	0	gag	CAN	0	0	0	gag	TTC	0	0	0	gag	CCC	0	0	0	gag	NNN	0	0	0	gag	TCT	0	0	0	gag	CAG	0	0	0	gag	CAG	0	0	0	gag	ACA	0	0	0	gag	ACA	0	0	0
gag	NNN	0	0	0	gag	NNN	0	0	0	gag	CTC	0	0	0	gag	TTT	0	0	0	gag	NNN	0	0	0	gag	CAG	0	0	0	gag	AAA	0	0	0	gag	GAG	0	0	0	gag	ACA	0	0	0	gag	GCG	0	0	0
gag	NNN	0	0	0	gag	NNN	0	0	0	gag	CAG	0	0	0	gag	CAG	0	0	0	gag	NNN	0	0	0	gag	AAG	0	0	0	gag	CAA	0	0	0	gag	ACA	0	0	0	gag	ACT	0	0	0	gag	GCT	0	0	0
gag	NNN	0	0	0	gag	NNN	0	0	0	gag	AGC	0	0	0	gag	AAG	0	0	0	gag	NNN	0	0	0	gag	CAG	0	0	0	gag	GAG	0	0	0	gag	CCA	0	0	0	gag	CCC	0	0	0	gag	CCC	0	0	0
gag	NNN	0	0	0	gag	NNN	0	0	0	gag	AGG	0	0	0	gag	CAG	0	0	0	gag	NNN	0	0	0	gag	GAT	0	0	0	gag	CCA	0	0	0	gag	CCA	0	0	0	gag	TCT	0	0	0	gag	TCT	0	0	0
gag	NNN	0	0	0	gag	NNN	0	0	0	gag	CCA	0	0	0	gag	GAG	0	0	0	gag	NNN	0	0	0	gag	CCG	0	0	0	gag	ACA	0	0	0	gag	GAC	0	0	0	gag	CAN	0	0	0	gag	CAG	0	0	0
gag	NNN	0	0	0	gag	NNN	0	0	0	gag	GAG	0	0	0	gag	ACG	0	0	0	gag	TAT	0	0	0	gag	ATA	0	0	0	gag	GAC	0	0	0	gag	AAG	0	0	0	gag	NNN	0	0	0	gag	AAG	0	0	0
gag	NNN	0	0	0	gag	NNN	0	0	0	gag	CCA	0	0	0	gag	ATA	0	0	0	gag	CCT	0	0	0	gag	GAC	0	0	0	gag	AAG	0	0	0	gag	GAA	0	0	0	gag	NNN	0	0	0	gag	CGG	0	0	0
gag	NNN	0	0	0	gag	NNN	0	0	0	gag	ACA	0	0	0	gag	GAC	0	0	0	gag	TTA	0	0	0	gag	AAG	0	0	0	gag	GAA	0	0	0	gag	CTG	0	0	0	gag	NNN	0	0	0	gag	GAG	0	0	0
gag	NNN	0	0	0	gag	NNN	0	0	0	gag	GCC	0	0	0	gag	AAG	0	0	0	gag	GCT	0	0	0	gag	GAA	0	0	0	gag	CTG	0	0	0	gag	TAT	0	0	0	gag	NNN	0	0	0	gag	CCG	0	0	0
gag	TAT	0	0	0	gag	CCT	0	0	0	gag	CCA	0	0	0	gag	GAG	0	0	0	gag	TCC	0	0	0	gag	AAG	0	0	0	gag	TAT	0	0	0	gag	CCC	0	0	0	gag	NNN	0	0	0	gag	ACA	0	0	0
gag	CCT	0	0	0	gag	TTA	0	0	0	gag	ACA	0	0	0	gag	ATG	0	0	0	gag	CTC	0	0	0	gag	TAT	0	0	0	gag	CCT	0	0	0	gag	TTA	0	0	0	gag	NNN	0	0	0	gag	GAC	0	0	0
gag	TTA	0	0	0	gag	ACT	0	0	0	gag	GCC	0	0	0	gag	TAT	0	0	0	gag	AGA	0	0	0	gag	CCT	0	0	0	gag	TTA	0	0	0	gag	GCT	0	0	0	gag	NNN	0	0	0	gag	AAG	0	0	0
gag	GCT	0	0	0	gag	TCC	0	0	0	gag	CCA	0	0	0	gag	CCT	0	0	0	gag	TCA	0	0	0	gag	TTA	0	0	0	gag	GCT	0	0	0	gag	TCC	0	0	0	gag	NNN	0	0	0	gag	GAA	0	0	0
gag	TCC	0	0	0	gag	CTC	0	0	0	gag	CCA	0	0	0	gag	TTA	0	0	0	gag	CTC	0	0	0	gag	GCT	0	0	0	gag	TCC	0	0	0	gag	CTC	0	0	0	gag	NNN	0	0	0	gag	CTG	0	0	0
gag	CTC	0	0	0	gag	AAA	0	0	0	gag	GNN	0	0	0	gag	ACC	0	0	0	gag	TTT	0	0	0	gag	TCC	0	0	0	gag	CTC	0	0	0	gag	AGA	0	0	0	gag	AAG	0	0	0	gag	TAT	0	0	0
gag	AGA	0	0	0	gag	TCA	0	0	0	pol	GGA	0	0	0	gag	TCC	0	0	0	gag	GGC	0	0	0	gag	CTC	0	0	0	gag	AGA	0	0	0	gag	TCA	0	0	0	gag	TAT	0	0	0	gag	CCC	0	0	0
gag	TCA	0	0	0	gag	CTC	0	0	0	pol	GCT	0	0	0	gag	CTC	0	0	0	gag	AGC	0	0	0	gag	AGA	0	0	0	gag	TCA	0	0	0	gag	CTC	0	0	0	gag	CCT	0	0	0	gag	TTA	0	0	0
gag	CTC	0	0	0	gag	TTT	0	0	0	pol	GAG	0	0	0	gag	AGA	0	0	0	gag	GAC	0	0	0	gag	TCA	0	0	0	gag	CTC	0	0	0	gag	TTT	0	0	0	gag	TTA	0	0	0	gag	GCT	0	0	0
gag	TTT	0	0	0	gag	GGC	0	0	0	pol	CGA	0	0	0	gag	TCA	0	0	0	gag	CCC	0	0	0	gag	CTC	0	0	0	gag	TTT	0	0	0	gag	GGC	0	0	0	gag	ACT	0	0	0	gag	TCC	0	0	0
gag	GGC	0	0	0	gag	AAC	0	0	0	pol	CAA	0	0	0	gag	CTC	0	0	0	gag	TTG	0	0	0	gag	TTT	0	0	0	gag	GGC	0	0	0	gag	AAC	0	0	0	gag	TCC	0	0	0	gag	CTC	0	0	0
gag	AAC	0	0	0	gag	GAC	0	0	0	pol	GGA	0	0	0	gag	TTT	0	0	0	gag	TCA	0	0	0	gag	GGC	0	0	0	gag	AAC	0	0	0	gag	GAC	0	0	0	gag	CTC	0	0	0	gag	AGA	0	0	0
gag	GAC	0	0	0	gag	CCC	0	0	0	pol	ACT	0	0	0	gag	GGC	0	0	0	gag	CAG	0	0	0	gag	AAC	0	0	0	gag	GAC	0	0	0	gag	CCC	0	0	0	gag	AGA	0	0	0	gag	TCA	0	0	0
gag	CCT	0	0	0	gag	TCG	0	0	0	pol	GTA	0	0	0	gag	AAC	0	0	0	gag	TAA	0	0	0	gag	GAC	0	0	0	gag	CCG	0	0	0	gag	TCG	0	0	0	gag	TCA	0	0	0	gag	CTC	0	0	0
gag	TAG	0	0	0	gag	TCA	0	0	0	pol	TCC	0	0	0	gag	GAC	0	0	0	pol	TTT	0	0	0	gag	CCC	0	0	0	gag	TCG	0	0	0	gag	TCA	0	0	0	gag	CTC	0	0	0	gag	TTT	0	0	0
gag	TTG	0	0	0	gag	CAA	0	0	0	pol	TTT	0	0	0	gag	CCC	0	0	0	pol	TTT	0	0	0	gag	TCG	0	0	0	gag	TCA	0	0	0	gag	CAG	0	0	0	gag	TTT	0	0	0	gag	GGC	0	0	0
gag	AGA	0	0	0	pol	TTT	0	0	0	pol	GGA	0	0	0	gag	TCG	0	0	0	pol	AGG	0	0	0	gag	TCA	0	0	0	gag	CAA	0	0	0	pol	TTT	0	0	0	gag	GGC	0	0	0	gag	AAC	0	0	0
pol	TTT	0	0	0	pol	TTT	0	0	0	pol	TTC	0	0	0	gag	TCC	0	0	0	pol	GAA	0	0	0	gag	CAA	0	0	0	pol	TTT	0	0	0	pol	TTT	0	0	0	gag	AAC	0	0	0	gag	GAC	0	0	0
pol	TTT	0	0	0	pol	AGG	0	0	0	pol	CCT	0	0	0	gag	AAA	0	0	0	pol	GAT	0	0	0	pol	TTT	0	0	0	pol	TTT	0	0	0	pol	AGG	0	0	0	gag	GAC	0	0	0	gag	CCC	0	0	0
pol	AGG	0	0	0	pol	GAA	0	0	0	pol	CAG	0	0	0	pol	TTT	0	0	0	pol	CTG	0	0	0	pol	TTT	0	0	0	pol	AGG	0	0	0	pol	AAA	0	0	0	gag	CCC	0	0	0	gag	TCG	0	0	0
pol	GAA	0	0	0	pol	AAT	0	0	0	pol	ATC	0	0	0	pol	TTT	0	0	0	pol	GCC	0	0	0	pol	AGG	0	0	0	pol	GAA	0	0	0	pol	AAT	0	0	0	gag	TCG	0	0	0	gag	TCC	0	0	0
pol	ACT	0	0	0	pol	CTG	0	0	0	pol	ACT	0	0	0	pol	AGG	0	0	0	pol	TCC	0	0	0	pol	GAA	0	0	0	pol	AAT	0	0	0	pol	CTG	0	0	0	gag	TCA	0	0	0	gag	CAA	1	0	0
pol	CTG	0	0	0	pol	GCC	0	0	0	pol	CTT	0	0	0	pol	GAA	0	0	0	pol	CTA	0	0	0	pol	AAT	0	0	0	pol	CTG	0	0	0	pol	GCC	0	0	0	gag	CAA	0	0	0	pol	TTT	0	0	0
pol	GCC	0	0	0	pol	TTC	0	0	0	pol	TGG	0	0	0	pol	AAT	0	0	0	pol	CAA	0	0	0	pol	CTG	0	0	0	pol	GCC	0	0	0	pol	TTC	0	0	0	pol	TTT	0	0	0	pol	TTT	0	0	0
pol	TTC	0	0	0	pol	CCA	0	0	0	pol	CAG	0	0	0	pol	CTG	0	0	0	pol	GGA	0	0	0	pol	GCC	0	0	0	pol	TTC	0	0	0	pol	CCA	0	0	0	pol	TTT	0	0	0	pol	AGG	0	0	0
pol	CCA	0	0	0	pol	CAA	0	0	0	pol	CGA	0	0	0	pol	GCC	0	0	0	pol	GAG	0	0	0	pol	TTC	0	0	0	pol	CCA	0	0	0	pol	CAA	0	0	0	pol	AGG	0	0	0	pol	GAA	0	0	0
pol	CAA	0	0	0	pol	GGG	0	0	0	pol	CCC	0	0	0	pol	TTC	0	0	0	pol	GCC	0	0	0	pol	CCA	0	0	0	pol	CAA	0	0	0	pol	GGG	0	0	0	pol	GAA	0	0	0	pol	GAT	0	0	0
pol	GGG	0	0	0	pol	GAG	0	0	0	pol	CTC	0	0	0	pol	CCA	0	0	0	pol	AGG	0	0	0	pol	CAA	0	0	0	pol	GGG	0	0	0	pol	GAG	0	0	0	pol	AAT	0	0	0	pol	CTG	0	0	0
pol	GAG	0	0	0	pol	GCC	0	0	0	pol	GTC	0	0	0	pol	CAA	0	0	0	pol	AAA	0	0	0	pol	GGG	0	0	0	pol	GAG	0	0	0	pol	GCC	0	0	0	pol	CTG	0	0	0	pol	GCC	0	0	0
pol	GCC	0	0	0	pol	AGG	0	0	0	pol	AAC	0	0	0	pol	GGG	0	0	0	pol	TTT	0	0	0	pol	GAG	0	0	0	pol	GCC	0	0	0	pol	AGG	0	0	0	pol	GCC	0	0	0	pol	TTC	0	0	0
pol	AGG	0	0	0	pol	AAA	0	0	0	pol	ATA	0	0	0	pol	GAG	0	0	0	pol	TCT	0	0	0	pol	GCC	0	0	0	pol	AGG	0	0	0	pol	GAA	0	0	0	pol	TTC	0	0	0	pol	CTC	0	0	0
pol	GAA	0	0	0	pol	TTT	0	0	0	pol	AAA	0	0	0	pol	GCC	0	0	0	pol	CCA	0	0	0	pol	AGG	0	0	0	pol	GAA	0	0	0	pol	TTT	0	0	0	pol	CCA	0	0	0	pol	CAA	0	0	0
pol	TTT	0	0	0	pol	CCC	0	0	0	pol	GTA	0	0	0	pol	AGG	0	0	0	pol	GAG	0	0	0	pol	GAA	0	0	0	pol	TTT	0	0	0	pol	TCT	0	0	0	pol	CAA	0	0	0	pol	AGG	0	0	0
pol	TCT	0	0	0	pol	TCA	0	0	0	pol	GGA	0	0	0	pol	GAA	0	0	0	pol	CAG	0	0	0	pol	TTT	0	0	0	pol	CCT	0	0	0	pol	TCA	0	0	0	pol	AGG	0	0	0	pol	AAG	0	0	0
pol	TCA	0	0	0	pol	GGG	0	0	0	pol	GGG	0	0	0	pol	TTT	0	0	0	pol	ACC	0	0	0	pol	CCT	0	0	0	pol	TCA	0	0	0	pol	GAG	0	0	0	pol	GAG	0	0	0	pol	GCC	0	0	0
pol	GAG	0	0	0	pol	CAG	0	0	0	pol	CAG	0	0	0	pol	CCT	0	0	0	pol	GGA	0	0	0	pol	TCA	0	0	0	pol	GAG	0	0	0	pol	CAG	0	0	0	pol	GCC	0	0	0	pol	AGG	0	0	0
pol	CAG	0	0	0	pol	ACT	0	0	0	pol	CTA	0	0	0	pol	CCA	0	0	0	pol	GCC	0	0	0	pol	AAG	0	0	0	pol	CAG	0	0	0	pol	ACC	0	0	0	pol	AGG	0	0	0	pol	GAA	0	0	0
pol	ACC	0	0	0	pol	AGA	0	0	0	pol	AAG	0	0	0	pol	GAG	0	0	0	pol	ATC	0	0	0	pol	CAG	0	0	0	pol	ACC	0	0	0	pol	AGA	0	0	0	pol	GAA	0	0	0	pol	CTT	0	0	0
pol	AGA	0	0	0	pol	GCC	0	0	0	pol	GAA	0	0	0	pol	CAG	0	0	0	pol	AGC	0	0	0	pol	ACC	0	0	0	pol	AGA	0	0	0	pol	GCC	0	0	0	pol	TTT	0	0	0	pol	CCT	0	0	0
pol	GCC	0	0	0	pol	AAC	0	0	0	pol	GCT	0	0	0	pol	ACC	0	0	0	pol	CCC	0	0	0	pol	AGA	0	0	0	pol	GCC	0	0	0	pol	AAC	0	0	0	pol	TCT	0	0	0	pol	TCA	0	0	0
pol	ATC	0	0	0	pol	AGC	0	0	0	pol	TTG	0	0	0	pol	AGA	0	0	0	pol	ACC	0	0	0	pol	GCC	0	0	0	pol	AAC	0	0	0	pol	AGC	0	0	0	pol	TCA	0	0	0	pol	GAG	0	0	0
pol	AGC	0	0	0	pol	CCC	0	0	0	pol	TTA	0	0	0	pol	GCA	0	0	0	pol	AGA	0	0	0	pol	AAC	0	0	0	pol	AGC	0	0	0	pol	CCC	0	0	0	pol	GAG	0	0	0	pol	CAG	0	0	0
pol	CCC	0	0	0	pol	ACC	0	0	0	pol	GAT	0	0	0	pol	GAG	0	0	0	pol	AGA	0	0	0	pol	AGC	0	0	0	pol	CCC	0	0	0	pol	ACC	0	0	0	pol	CAG	0	0	0	pol	ACC	0	0	0
pol	ACC	0	0	0	pol	AGN	0	0	0	pol	ACA	0	0	0	pol	CAG	0	0	0	pol	AAG	0	0	0	pol	CCC	0	0	0	pol	ACC	0	0	0	pol	AGN	0	0	0	pol	ACC	0	0	0	pol	AGA	0	0	0
pol	AGN	0	0	0	pol	NNN	0	0	0	pol	GGA	0	0	0	pol	ACT	0	0	0	pol	CTT	0	0	0	pol	ACC	0	0	0	pol	AGA	0	0	0	pol	NNN	0	0	0	pol	AGA	0	0	0	pol	GCC	0	0	0
pol	NNN	0	0	0	pol	NNN	0	0	0	pol	GCA	0	0	0	pol	AGA	0	0	0	pol	CAG	0	0	0	pol	AGA	0	0	0	pol	GGA	0	0	0	pol	NNN	0	0	0	pol	GCC	0	0	0	pol	AAC	0	0	0
pol	NNN	0	0	0	pol	NNN	0	0	0	pol	GAT	0	0	0	pol	GCC	0	0	0	pol	GTT	0	0	0	pol	GGA	0	0	0	pol	GAG	0	0	0	pol	NNN	0	0	0	pol	AAC	0	0	0	pol	AGC	0	0	0
pol	NNN	0	0	0	pol	NNN	0	0	0	pol	GAT	0	0	0	pol	AAC	0	0	0	pol	TGG	1	1	0	pol	GAG	0	0	0	pol	CTT	0	0	0	pol	NNN	0	0	0	pol	AGC	0	0	0	pol	CCC	0	0	0
pol	NNN	0	0	0	pol	NNN	0	0	0	pol	ACA	0	0	0	pol	AGC	0	0	0	pol	GGA	0	0	0	pol	CTT	0	0	0	pol	CAG	0	0	0	pol	NNN	0	0	0	pol	CCC	0	0	0	pol	ACT	0	0	0
pol	NNN	0	0	0	pol	NNN	0	0	0	pol	GTA	0	0	0	pol	CCC	0	0	0	pol	GGA	0	0	0	pol	CAG	0	0	0	pol	GTT	0	0	0	pol	NNN	0	0	0	pol	ACC	0	0	0	pol	AGA	0	0	0
pol	NNN	0	0	0	pol	NNA	0	0	0	pol	TTA	0	0	0	pol	ACC	0	0	0	pol	GAC	0	0	0	pol	GTT	0	0	0	pol	TGG	3	0	3	pol	NNA	0	0	0	pol	AGN	0	0	0	pol	GCC	0	0	0
pol	NNA	0	0	0	pol	AGA	0	0	0	pol	GAA	0	0	0	pol	AGN	0	0	0	pol	AAC	0	0	0	pol	TGG	4	1	1	pol	GGA	0	0	0	pol	GGA	0	0	0	pol	NNN	0	0	0	pol	ATC	0	0	0
pol	GGA	0	0	0	pol	GAT	0	0	0	pol	GAC	0	0	0	pol	NNN	0	0	0	pol	AAC	0	0	0	pol	GGA	0	0	0	pol	GGA	0	0	0	pol	GAT	0	0	0	pol	NNN	0	0	0	pol	AGC	0	0	0
pol	GAC	0	0	0	pol	AAC	0	0	0	pol	ATG	0	0	0	pol	NNN	0	0	0	pol	TCC	0	0	0	pol	AGA	0	0	0	pol	GAT	0	0	0	pol	GAC	0	0	0	pol	NNN	0	0	0	pol	CCC	0	0	0
pol	AAC	0	0	0	pol	AAC	0	0	0	pol	AAT	0	0	0	pol	NNN	0	0	0	pol	CTC	0	0	0	pol	AAC	0	0	0	pol	AAA	0	0	0	pol	AAC	0	0	0	pol	NNN	0	0	0	pol	ACC	0	0	0
pol	AAC	0	0	0	pol	TCC	0	0	0	pol	TTG	0	0	0	pol	NNN	0	0	0	pol	CCA	0	0	0	pol	AGC	0	0	0	pol	AAC	0	0	0	pol	TCC	0	0	0	pol	NNN	0	0	0	pol	AGA	0	0	0
pol	TCC	0	0	0	pol	CTC	0	0	0	pol	CCA	0	0	0	pol	NNN	0	0	0	pol	NNN	0	0	0	pol	AAC	0	0	0	pol	TCC	0	0	0	pol	CTC	0	0	0	pol	NNN	0	0	0	pol	AGA	0	0	0
pol	CTC	0	0	0	pol	TCA	0	0	0	pol	GGA	0	0	0	pol	NNN	0	0	0	pol	NNN	0	0	0	pol	TCC	0	0	0	pol	CCC	0	0	0	pol	TCA	0	0	0	pol	NNA	0	0	0	pol	GAG	0	0	0
pol	TCA	0	0	0	pol	NNN	0	0	0	pol	AGA	0	0	0	pol	NNA	0	0	0	pol	NNN	0	0	0	pol	CTC	0	0	0	pol	TCA	0	0	0	pol	GAA	0	0	0	pol	AGA	0	0	0	pol	CTT	0	0	0
pol	NNN	0	0	0	pol	NNN	0	0	0	pol	TGG	0	0	0	pol	AGA	0	0	0	pol	NNN	0	0	0	pol	TCA	0	0	0	pol	GAA	0	0	0	pol	GCA	0	0	0	pol	GAC	0	0	0	pol	CAG	0	0	0
pol	NNN	0	0	0	pol	NNN	0	0	0	pol	AAA	0	0	0	pol	GAC	0	0	0	pol	NNN	0	0	0	pol	GAA	0	0	0	pol	ACA	0	0	0	pol	GGA	0	0	0	pol	AAC	0	0	0	pol	GTT	0	0	0
pol	NNN	0	0	0	pol	NNN	0	0	0	pol	CCA	0	0	0	pol	AAC	0	0	0	pol	NNN	0	0	0	pol	GCA	0	0	0	pol	AGA	0	0	0	pol	GAC	0	0	0	pol	AAC	0	0	0	pol	TGG	4	4	0
pol	NNN	0	0	0	pol	NNN	0	0	0	pol	AAA	0	0	0	pol	AAA	0	0	0	pol	NNN	0	0	0	pol	GGA	0	0	0	pol	GCC	0	0	0	pol	ACC	0	0	0	pol	TCC	0	0	0	pol	GGA	0	0	0
pol	NNN	0	0	0	pol	NNN	0	0	0	pol	ATG	0	0	0	pol	TCC	0	0	0	pol	TCC	0	0	0	pol	TCC	0	0	0	pol	AAC	0	0	0	pol	ACC	0	0	0	pol	CTC	0	0	0	pol	GGA	0	0	0
pol	NNN	0	0	0	pol	NNN	0	0	0	pol	ATA	0	0	0	pol	CTT	0	0	0	pol	TTT	0	0	0	pol	GAT	0	0	0	pol	AGA	0	0	0	pol	AGA	0	0	0	pol	TCA	0	0	0	pol	GAC	0	0	0
pol	NNN	0	0	0	pol	NNN	0	0	0	pol	GGG	0	0	0	pol	TCA	0	0	0	pol	AGC	0	0	0	pol	AGA	0	0	0	pol	CAA	0	0	0	pol	CAA	0	0	0	pol	NNN	0	0	0	pol	AGC	0	0	0
pol	NNN	0	0	0	pol	NNN	0	0	0	pol	GGA	0	0	0	pol	GAA	0	0	0	pol	TTC	0	0	0	pol	CAA	0	0	0	pol	GGA	0	0	0	pol	GGA	0	0	0	pol	NNN	0	0	0	pol	GGC	0	0	0
pol	NNN	0	0	0	pol	NCC	0	0	0	pol	ATT	0	0	0	pol	GCA	0	0	0	pol	CCT	0	0	0	pol	GGA	0	0	0	pol	ACT	0	0	0	pol	ACT	0	0	0	pol	NNN	0	0	0	pol	TCC	0	0	0
pol	NTA	0	0	0	pol	TTT	0	0	0	pol	GGA	0	0	0	pol	GGA	0	0	0	pol	CAG	0	0	0	pol	AAA	0	0	0	pol	GTA	0	0	0	pol	GTA	0	0	0	pol	NNN	0	0	0	pol	CTC	0	0	0
pol	TCC	0	0	0	pol	AAC	0	0	0	pol	GGT	0	0	0	pol	GAC	0	0	0	pol	ATC	0	0	0	pol	GTA	0	0	0	pol	TCC	0	0	0	pol	TCC	0	0	0	pol	NNN	0	0	0	pol	TCA	0	0	0
pol	TTT	0	0	0	pol	TTC	0	0	0	pol	TTT	0	0	0	pol	GAT	0	0	0	pol	ACT	0	0	0	pol	TCC	0	0	0	pol	TTT	0	0	0	pol	CTT	0	0	0	pol	NNN	0	0	0	pol	GAA	0	0	0
pol	AGC	0	0	0	pol	CCT	0	0	0	pol	ATC	0	0	0	pol	AGA	0	0	0	pol	CTT	0	0	0	pol	TTT	0	0	0	pol	AGC	0	0	0	pol	AGC	0	0	0	pol	NNN	0	0	0	pol	GCG	0	0	0
pol	TTC	0	0	0	pol	CAA	0	0	0	pol	AAA	0	0	0	pol	CAA	0	0	0	pol	TGG	0	0	0	pol	AGC	0	0	0	pol	TTC	0	0	0	pol	TTC	0	0	0	pol	NNN	0	0	0	pol	GGA	0	0	0
pol	CCT	0	0	0	pol	ATC	0	0	0	pol	GTA	0	0	0	pol	GGA	0	0	0	pol	CAG	0	0	0	pol	TTC	0	0	0	pol	CCT	0	0	0	pol	CCT	0	0	0	pol	NNN	0	0	0	pol	GCC	0	0	0
pol	CAG	0	0	0	pol	ACT	0	0	0	pol	AAA	0	0	0	pol	GAT	0	0	0	pol	CGA	0	0	0	pol	CCT	0	0	0	pol	CAG	0	0	0	pol	CAG	0	0	0	pol	NAA	0	0	0	pol	GAC	0	0	0
pol	ATC	0	0	0	pol	CTT	0	0	0	pol	CAG	0	0	0	pol	GTA	0	0	0	pol	CCC	0	0	0	pol	CAG	0	0	0	pol	ATC	0	0	0	pol	ATC	0	0	0	pol	GTA	0	0	0	pol	AGA	0	0	0
pol	ACT	0	0	0	pol	TGG	0	0	0	pol	TAT	0	0	0	pol	TCC	0	0	0	pol	CTT	0	0	0	pol	ATC	0	0	0	pol	ACT	0	0	0	pol	ACT	0	0	0	pol	TCC	0	0	0	pol	CAA	0	0	0
pol	CTT	0	0	0	pol	CAA	0	0	0	pol	GAT	0	0	0	pol	TTT	0	0	0	pol	GTC	0	0	0	pol	ACT	0	0	0	pol	CTT	0	0	0	pol	CTT	0	0	0	pol	TTT	0	0	0	pol	GGA	0	0	0
pol	TGG	0	0	0	pol	CGA	0	0	0	pol	CAG	0	0	0	pol	AAC	0	0	0	pol	ACA	0	0	0	pol	CTT	0	0	0	pol	TGG	0	0	0	pol	TGG	0	0	0	pol	AAC	0	0	0	pol	ACT	0	0	0
pol	CAA	0	0	0	pol	CCC	0	0	0	pol	GTA	0	0	0	pol	CTC	0	0	0	pol	GTA	0	0	0	pol	TGG	0	1	0	pol	CAA	0	0	0	pol	CAA	0	0	0	pol	TTC	0	0	0	pol	GTA	0	0	0
pol	CGA	0	0	0	pol	CTC	0	0	0	pol	CCC	0	0	0	pol	CCT	0	0	0	pol	AAA	0	0	0	pol	CAA	0	0	0	pol	CGA	0	0	0	pol	CGA	0	0	0	pol	CCT	0	0	0	pol	TCC	0	0	0
pol	CCC	0	0	0	pol	GTC	0	0	0	pol	ATA	0	0	0	pol	CAG	0	0	0	pol	ATA	0	0	0	pol	CGA	0	0	0	pol	CCC	0	0	0	pol	CCC	0	0	0	pol	CAG	0	0	0	pol	CTT	0	0	0
pol	TTA	0	0	0	pol	ACA	0	0	0	pol	GAA	0	0	0	pol	ATC	0	0	0	pol	GGG	0	0	0	pol	CCC	0	0	0	pol	GTC	0	0	0	pol	CTC	0	0	0	pol	ATC	0	0	0	pol	AGC	0	0	0
pol	GTT	0	0	0	pol	ATA	0	0	0	pol	ATT	0	0	0	pol	ACT	0	0	0	pol	GGG	0	0	0	pol	CTC	0	0	0	pol	GTC	0	0	0	pol	GTC	0	0	0	pol	ACT	0	0	0	pol	TTC	0	0	0
pol	GAG	0	0	0	pol	AAG	0	0	0	pol	TAT	0	0	0	pol	CTT	0	0	0	pol	CAA	0	0	0	pol	GTC	0	0	0	pol	ACA	0	0	0	pol	ACA	0	0	0	pol	CTT	0	0	0	pol	CCT	0	0	0
pol	ATA	0	0	0	pol	ATA	0	0	0	pol	GGA	0	0	0	pol	TGG	0	0	0	pol	CTA	0	0	0	pol	ACA	0	0	0	pol	ATA	0	0	0	pol	GTA	0	0	0	pol	TGG	0	0	0	pol	CAG	0	0	0
pol	AAG	0	0	0	pol	GGG	0	0	0	pol	CAT	0	0	0	pol	CAA	0	0	0	pol	AAG	0	0	0	pol	ATA	0	0	0	pol	AAG	0	0	0	pol	AAG	0	0	0	pol	CAA	0	0	0	pol	ATC	0	0	0
pol	ATA	0	0	0	pol	GGG	0	0	0	pol	AAA	0	0	0	pol	CGA	0	0	0	pol	GAA	0	0	0	pol	AAG	0	0	0	pol	GTA	0	0	0	pol	ATA	0	0	0	pol	CGA	0	0	0	pol	ACT	0	0	0
pol	GGG	0	0	0	pol	CAA	0	0	0	pol	GCT	0	0	0	pol	CCC	0	0	0	pol	GCT	0	0	0	pol	ATA	0	0	0	pol	GGG	0	0	0	pol	GGG	0	0	0	pol	CCC	0	0	0	pol	CTT	0	0	0
pol	GGG	0	0	0	pol	CTA	0	0	0	pol	ATA	0	0	0	pol	CTC	0	0	0	pol	CTA	0	0	0	pol	GGG	0	0	0	pol	GGG	0	0	0	pol	GGG	0	0	0	pol	CTC	0	0	0	pol	TGG	0	1	0
pol	CAA	0	0	0	pol	AAG	0	0	0	pol	GGT	0	0	0	pol	GTC	0	0	0	pol	TTA	0	0	0	pol	GGG	0	0	0	pol	CAA	0	0	0	pol	CAA	0	0	0	pol	GTC	0	0	0	pol	CAA	0	0	0
pol	ATA	0	0	0	pol	GAA	0	0	0	pol	ACA	0	0	0	pol	CAA	0	0	0	pol	GAT	0	0	0	pol	CAG	0	0	0	pol	CTA	0	0	0	pol	CTA	0	0	0	pol	ACA	0	0	0	pol	CGA	0	0	0
pol	AAG	0	0	0	pol	GCT	0	0	0	pol	GTA	0	0	0	pol	ATA	0	0	0	pol	ACA	0	0	0	pol	CTA	0	0	0	pol	AAG	0	0	0	pol	AAG	0	0	0	pol	ATA	0	0	0	pol	CCC	0	0	0
pol	GAA	0	0	0	pol	CTA	0	0	0	pol	TTA	0	0	0	pol	AAG	0	0	0	pol	GGA	0	0	0	pol	AAG	0	0	0	pol	GAA	0	0	0	pol	GAA	0	0	0	pol	AAA	0	0	0	pol	CTC	0	0	0
pol	GCT	0	0	0	pol	TTA	0	0	0	pol	ATA	0	0	0	pol	ATA	0	0	0	pol	GCA	0	0	0	pol	GAA	0	0	0	pol	GCT	0	0	0	pol	GCT	0	0	0	pol	ATA	0	0	0	pol	GTC	0	0	0
pol	CTA	0	0	0	pol	GAT	0	0	0	pol	GGA	0	0	0	pol	GGG	0	0	0	pol	GAT	0	0	0	pol	GCT	0	0	0	pol	CTA	0	0	0	pol	CTA	0	0	0	pol	GGG	0	0	0	pol	CCA	0	0	0
pol	TTA	0	0	0	pol	ACA	0	0	0	pol	CCT	0	0	0	pol	GGG	0	0	0	pol	GAT	0	0	0	pol	CTA	0	0	0	pol	TTA	0	0	0	pol	TTA	0	0	0	pol	GGG	0	0	0	pol	ATA	0	0	0
pol	GAT	0	0	0	pol	GGA	0	0	0	pol	ACA	0	0	0	pol	CAA	0	0	0	pol	ACA	0	0	0	pol	TTA	0	0	0	pol	GAT	0	0	0	pol	GAT	0	0	0	pol	CAA	0	0	0	pol	AGG	0	0	0
pol	ACA	0	0	0	pol	GCA	0	0	0	pol	CCT	0	0	0	pol	ATA	0	0	0	pol	GTA	0	0	0	pol	GAT	0	0	0	pol	ACA	0	0	0	pol	ACA	0	0	0	pol	CTA	0	0	0	pol	ATA	0	0	0
pol	GGA	0	0	0	pol	GAT	0	0	0	pol	GTC	0	0	0	pol	AAA	0	0	0	pol	CTA	0	0	0	pol	ACA	0	0	0	pol	GGA	0	0	0	pol	GGA	0	0	0	pol	AAA	0	0	0	pol	GGG	0	0	0
pol	GCA	0	0	0	pol	GAT	0	0	0	pol	AAC	0	0	0	pol	GAA	0	0	0	pol	GAA	0	0	0	pol	GGA	0	0	0	pol	GCA	0	0	0	pol	GCA	0	0	0	pol	GAA	0	0	0	pol	GGG	0	0	0
pol	GAT	0	0	0	pol	ACA	0	0	0	pol	ATA	0	0	0	pol	GCT	0	0	0	pol	GAT	0	0	0	pol	GCA	0	0	0	pol	GAT	0	0	0	pol	GAT	0	0	0	pol	GCT	0	0	0	pol	CAA	0	0	0
pol	GAT	0	0	0	pol	GTA	0	0	0	pol	ATT	0	0	0	pol	CTA	0	0	0	pol	ATA	0	0	0	pol	GAT	0	0	0	pol	GAT	0	0	0	pol	GAT	0	0	0	pol	CTA	0	0	0	pol	CTA	0	0	0
pol	ACA	0	0	0	pol	ATA	0	0	0	pol	GGC	0	0	0	pol	TTA	0	0	0	pol	GAT	0	0	0	pol	GAT	0	0	0	pol	ACA	0	0	0	pol	ACA	0	0	0	pol	TTA	0	0	0	pol	AAG	0	0	0
pol	GTA	0	0	0	pol	GAA	0	0	0	pol	AGA	0	0	0	pol	GAT	0	0	0	pol	TTG	0	0	0	pol	ACA	0	0	0	pol	GTA	0	0	0	pol	GTA	0	0	0	pol	GAT	0	0	0	pol	GAA	0	0	0
pol	TTA	0	0	0	pol	GAA	0	0	0	pol	AAC	0	0	0	pol	ACA	0	0	0	pol	CCA	0	0	0	pol	GTA	0	0	0	pol	CTA	0	0	0	pol	TTA	0	0	0	pol	ACA	0	0	0	pol	GCT	0	0	0
pol	GAA	0	0	0	pol	ATG	0	0	0	pol	TTG	0	0	0	pol	GGA	0	0	0	pol	GGA	0	0	0	pol	TTA	0	0	0	pol	GAA	0	0	0	pol	GAA	0	0	0	pol	GGA	0	0	0	pol	CTA	0	0	0
pol	GAA	0	0	0	pol	ACT	0	0	0	pol	TTG	0	0	0	pol	GCA	0	0	0	pol	AGA	0	0	0	pol	GAA	0	0	0	pol	GAA	0	0	0	pol	GAA	0	0	0	pol	GCA	0	0	0	pol	TTA	0	0	0
pol	ATG	0	0	0	pol	TTG	0	0	0	pol	ACT	0	0	0	pol	GAT	0	0	0	pol	TGG	0	3	0	pol	GAA	0	0	0	pol	ATA	0	0	0	pol	ATG	0	0	0	pol	GAT	0	0	0	pol	GAT	0	0	0
pol	AAT	0	0	0	pol	TCA	0	0	0	pol	CAG	0	0	0	pol	GAT	0	0	0	pol	AAA	0	0	0	pol	ATA	0	0	0	pol	AAT	0	0	0	pol	AGT	0	0	0	pol	GAC	0	0	0	pol	ACA	0	0	0
pol	TTG	0	0	0	pol	GGA	0	0	0	pol	ATT	0	0	0	pol	ACA	0	0	0	pol	CCA	0	0	0	pol	AAT	0	0	0	pol	TTG	0	0	0	pol	TTG	0	0	0	pol	ACA	0	0	0	pol	GGA	0	0	0
pol	CCC	0	0	0	pol	AAA	0	0	0	pol	GGT	0	0	0	pol	GTA	0	0	0	pol	AAA	0	0	0	pol	TTG	0	0	0	pol	CCA	0	0	0	pol	CCA	0	0	0	pol	GTA	0	0	0	pol	GCA	0	0	0
pol	GGG	0	0	0	pol	TGG	0	1	0	pol	TGC	0	0	0	pol	TTA	0	0	0	pol	ATG	0	0	0	pol	CCA	0	0	0	pol	GGG	0	0	0	pol	GGA	0	0	0	pol	TTA	0	0	0	pol	GAT	0	0	0
pol	AGA	0	0	0	pol	AAA	0	0	0	pol	ACT	0	0	0	pol	GAA	0	0	0	pol	ATA	0	0	0	pol	GGA	0	0	0	pol	AAA	0	0	0	pol	AGA	0	0	0	pol	GAA	0	0	0	pol	GAT	0	0	0
pol	TGG	0	3	1	pol	CCA	0	0	0	pol	TTA	0	0	0	pol	GAA	0	0	0	pol	GGG	0	0	0	pol	AGA	0	0	0	pol	TGG	0	7	1	pol	TGG	0	1	1	pol	GAC	0	0	0	pol	ACA	0	0	0
pol	AAA	0	0	0	pol	AAA	0	0	0	pol	AAT	0	0	0	pol	ATG	0	0	0	pol	GGA	0	0	0	pol	TGG	1	5	0	pol	AAA	0	0	0	pol	AAA	0	0	0	pol	ATG	0	0	0	pol	GTA	0	0	0
pol	CCA	0	0	0	pol	ATG	0	0	0	pol	TTT	0	0	0	pol	AGT	0	0	0	pol	ATT	0	0	0	pol	AAA	0	0	0	pol	CCA	0	0	0	pol	CCA	0	0	0	pol	AAT	0	0	0	pol	TTA	0	0	0
pol	AAA	0	0	0	pol	ATA	0	0	0	pol	CCC	0	0	0	pol	TTA	0	0	0	pol	GGA	0	0	0	pol	CCA	0	0	0	pol	AAA	0	0	0	pol	AAA	0	0	0	pol	TTG	0	0	0	pol	GAA	0	0	0
pol	ATG	0	0	0	pol	GGG	0	0	0	pol	ATT	0	0	0	pol	CCA	0	0	0	pol	GGC	0	0	0	pol	AAA	0	0	0	pol	ATG	0	0	0	pol	ATG	0	0	0	pol	CCA	0	0	0	pol	GAC	0	0	0
pol	ATA	0	0	0	pol	GGA	0	0	0	pol	AGT	0	0	0	pol	GGA	0	0	0	pol	TTT	0	0	0	pol	ATG	0	0	0	pol	ATA	0	0	0	pol	ATA	0	0	0	pol	GGA	0	0	0	pol	ATG	0	0	0
pol	GGG	0	0	0	pol	ATT	0	0	0	pol	CCT	0	0	0	pol	AGA	0	0	0	pol	ATT	0	0	0	pol	ATA	0	0	0	pol	GGG	0	0	0	pol	GGG	0	0	0	pol	AGA	0	0	0	pol	GAT	0	0	0
pol	GGA	0	0	0	pol	GGA	0	0	0	pol	ATT	0	0	0	pol	TGG	0	0	0	pol	AAA	0	0	0	pol	GGG	0	0	0	pol	GGA	0	0	0	pol	GGA	0	0	0	pol	TGG	0	4	0	pol	TTG	0	0	0
pol	ATT	0	0	0	pol	GGT	0	0	0	pol	GAG	0	0	0	pol	AAA	0	0	0	pol	GTA	0	0	0	pol	GGA	0	0	0	pol	ATT	0	0	0	pol	ATT	0	0	0	pol	AAA	0	0	0	pol	CCA	0	0	0
pol	GGA	0	0	0	pol	TTT	0	0	0	pol	ACT	0	0	0	pol	CCA	0	0	0	pol	AGA	0	0	0	pol	ATT	0	0	0	pol	GGA	0	0	0	pol	GGA	0	0	0	pol	CCA	0	0	0	pol	GGA	0	0	0
pol	GGT	0	0	0	pol	ATC	0	0	0	pol	GTA	0	0	0	pol	AAA	0	0	0	pol	CAG	0	0	0	pol	GGA	0	0	0	pol	GGT	0	0	0	pol	GGT	0	0	0	pol	AAA	0	0	0	pol	AGA	0	0	0
pol	TTT	0	0	0	pol	AAA	0	0	0	pol	CCA	0	0	0	pol	ATG	0	0	0	pol	TAT	0	0	0	pol	GGT	0	0	0	pol	TTT	0	0	0	pol	TTT	0	0	0	pol	ATG	0	0	0	pol	TGG	1	5	0
pol	ATC	0	0	0	pol	GTA	0	0	0	pol	GTA	0	0	0	pol	ATA	0	0	0	pol	GAT	0	0	0	pol	TTT	0	0	0	pol	ATC	0	0	0	pol	ATC	0	0	0	pol	ATA	0	0	0	pol	AAA	0	0	0
pol	AAA	0	0	0	pol	AGA	0	0	0	pol	AAA	0	0	0	pol	GGG	0	0	0	pol	CAA	0	0	0	pol	ATC	0	0	0	pol	AAA	0	0	0	pol	AAA	0	0	0	pol	GGG	0	0	0	pol	CCA	0	0	0
pol	GTA	0	0	0	pol	CAG	0	0	0	pol	TTA	0	0	0	pol	GGA	0	0	0	pol	ATA	0	0	0	pol	AAA	0	0	0	pol	GTG	0	0	0	pol	GTA	0	0	0	pol	GGA	0	0	0	pol	AAA	0	0	0
pol	AGA	0	0	0	pol	TAT	0	0	0	pol	AAG	0	0	0	pol	ATT	0	0	0	pol	GCC	0	0	0	pol	GTA	0	0	0	pol	AGA	0	0	0	pol	AGG	0	0	0	pol	ATT	0	0	0	pol	ATG	0	0	0
pol	GAG	0	0	0	pol	GAT	0	0	0	pol	CCA	0	0	0	pol	GGA	0	0	0	pol	GTG	0	0	0	pol	AGA	0	0	0	pol	CAG	0	0	0	pol	CAG	0	0	0	pol	GGA	0	0	0	pol	ATA	0	0	0
pol	TAT	0	0	0	pol	CAG	0	0	0	pol	GGA	0	0	0	pol	GGT	0	0	0	pol	GAA	0	0	0	pol	CAG	0	0	0	pol	TAT	0	0	0	pol	TAT	0	0	0	pol	GGT	0	0	0	pol	GGG	0	0	0
pol	GAG	0	0	0	pol	ATA	0	0	0	pol	ATG	0	0	0	pol	TTT	0	0	0	pol	ATC	0	0	0	pol	TAT	0	0	0	pol	GAT	0	0	0	pol	GAT	0	0	0	pol	TTT	0	0	0	pol	GGA	0	0	0
pol	CAG	0	0	0	pol	CCC	0	0	0	pol	GAT	0	0	0	pol	ATC	0	0	0	pol	TGT	0	0	0	pol	GAT	0	0	0	pol	CAG	0	0	0	pol	CAG	0	0	0	pol	ATC	0	0	0	pol	ATT	0	0	0
pol	ATA	0	0	0	pol	ATA	0	0	0	pol	GGC	0	0	0	pol	AAA	0	0	0	pol	GGA	0	0	0	pol	CAG	0	0	0	pol	GTA	0	0	0	pol	ATA	0	0	0	pol	AAA	0	0	0	pol	GGA	0	0	0
pol	CTC	0	0	0	pol	GAA	0	0	0	pol	CCA	0	0	0	pol	GTA	0	0	0	pol	CAT	0	0	0	pol	ATA	0	0	0	pol	CCC	0	0	0	pol	CCC	0	0	0	pol	GTA	0	0	0	pol	GGT	0	0	0
pol	GTA	0	0	0	pol	ATT	0	0	0	pol	AAA	0	0	0	pol	AGA	0	0	0	pol	AAA	0	0	0	pol	TCC	0	0	0	pol	ATA	0	0	0	pol	GTA	0	0	0	pol	AGA	0	0	0	pol	TTT	0	0	0
pol	GAA	0	0	0	pol	GAG	0	0	0	pol	GTT	0	0	0	pol	CAA	0	0	0	pol	GCT	0	0	0	pol	ATA	0	0	0	pol	GAA	0	0	0	pol	GAA	0	0	0	pol	CAG	0	0	0	pol	ATC	0	0	0
pol	ATC	0	0	0	pol	GGA	0	0	0	pol	AAA	0	0	0	pol	TAT	0	0	0	pol	ATA	0	0	0	pol	GAA	0	0	0	pol	ATT	0	0	0	pol	ATC	0	0	0	pol	TAT	0	0	0	pol	AAA	0	0	0
pol	TGT	0	0	0	pol	CAT	0	0	0	pol	CAA	0	0	0	pol	GAT	0	0	0	pol	GGT	0	0	0	pol	ATC	0	0	0	pol	AGT	0	0	0	pol	TGC	0	0	0	pol	GAT	0	0	0	pol	GTA	0	0	0
pol	GGA	0	0	0	pol	AAA	0	0	0	pol	TGG	0	0	0	pol	CAG	0	0	0	pol	ACA	0	0	0	pol	TGT	0	0	0	pol	GGG	0	0	0	pol	GGA	0	0	0	pol	CAG	0	0	0	pol	AAG	0	0	0
pol	CAT	0	0	0	pol	GTT	0	0	0	pol	CCA	0	0	0	pol	ATA	0	0	0	pol	GTG	0	0	0	pol	GGG	0	0	0	pol	CAT	0	0	0	pol	CAT	0	0	0	pol	ATA	0	0	0	pol	CAA	0	0	0
pol	AAA	0	0	0	pol	ATA	0	0	0	pol	TTG	0	0	0	pol	CTC	0	0	0	pol	TTA	0	0	0	pol	CAT	0	0	0	pol	AAA	0	0	0	pol	AAG	0	0	0	pol	CCC	0	0	0	pol	TAT	0	0	0
pol	GCT	0	0	0	pol	GGT	0	0	0	pol	ACA	0	0	0	pol	ATA	0	0	0	pol	ATA	0	0	0	pol	AAA	0	0	0	pol	GCC	0	0	0	pol	GCT	0	0	0	pol	ATA	0	0	0	pol	GAT	0	0	0
pol	ATA	0	0	0	pol	ACA	0	0	0	pol	GAA	0	0	0	pol	GAA	0	0	0	pol	GGA	0	0	0	pol	GCT	0	0	0	pol	ATA	0	0	0	pol	ATA	0	0	0	pol	GAA	0	0	0	pol	CAA	0	0	0
pol	GGT	0	0	0	pol	GTG	0	0	0	pol	GAA	0	0	0	pol	ATC	0	0	0	pol	CCC	0	0	0	pol	ATA	0	0	0	pol	GGT	0	0	0	pol	GGT	0	0	0	pol	ATC	0	0	0	pol	ATA	0	0	0
pol	GCA	0	0	0	pol	TTA	0	0	0	pol	AAA	0	0	0	pol	TGT	0	0	0	pol	ACA	0	0	0	pol	GGT	0	0	0	pol	ACA	0	0	0	pol	ACA	0	0	0	pol	TGT	0	0	0	pol	ACC	0	0	0
pol	GTA	0	0	0	pol	ATA	0	0	0	pol	ATA	0	0	0	pol	GGA	0	0	0	pol	CCT	0	0	0	pol	ACA	0	0	0	pol	GTA	0	0	0	pol	GTA	0	0	0	pol	GGA	0	0	0	pol	ATA	0	0	0
pol	TTA	0	0	0	pol	GGA	0	0	0	pol	AAA	0	0	0	pol	CAT	0	0	0	pol	GTC	0	0	0	pol	GTA	0	0	0	pol	TTA	0	0	0	pol	TTA	0	0	0	pol	CAT	0	0	0	pol	GAA	0	0	0
pol	GTA	0	0	0	pol	CCT	0	0	0	pol	GCA	0	0	0	pol	AAA	0	0	0	pol	AAC	0	0	0	pol	TTA	0	0	0	pol	GTA	0	0	0	pol	ATA	0	0	0	pol	AAA	0	0	0	pol	ATT	0	0	0
pol	GGA	0	0	0	pol	ACA	0	0	0	pol	TTA	0	0	0	pol	GCT	0	0	0	pol	ATA	0	0	0	pol	GTA	0	0	0	pol	GGA	0	0	0	pol	GGA	0	0	0	pol	ACT	0	0	0	pol	TGT	0	0	0
pol	CCT	0	0	0	pol	CCT	0	0	0	pol	GTA	0	0	0	pol	ATA	0	0	0	pol	ATT	0	0	0	pol	GGA	0	0	0	pol	CCT	0	0	0	pol	CCT	0	0	0	pol	ATA	0	0	0	pol	GGA	0	0	0
pol	ACA	0	0	0	pol	GTC	0	0	0	pol	GAA	0	0	0	pol	GGT	0	0	0	pol	GGA	0	0	0	pol	CCT	0	0	0	pol	ACA	0	0	0	pol	ACA	0	0	0	pol	GGT	0	0	0	pol	CAT	0	0	0
pol	CCA	0	0	0	pol	AAC	0	0	0	pol	ATT	0	0	0	pol	ACA	0	0	0	pol	AGA	0	0	0	pol	ACA	0	0	0	pol	CCT	0	0	0	pol	CCT	0	0	0	pol	ACA	0	0	0	pol	AAA	0	0	0
pol	GTC	0	0	0	pol	ATA	0	0	0	pol	TGT	0	0	0	pol	GTA	0	0	0	pol	AAT	0	0	0	pol	CCT	0	0	0	pol	GTC	0	0	0	pol	GTC	0	0	0	pol	GTA	0	0	0	pol	ACC	0	0	0
pol	AAC	0	0	0	pol	ATT	0	0	0	pol	ACA	0	0	0	pol	TTA	0	0	0	pol	CTG	0	0	0	pol	GTC	0	0	0	pol	AAC	0	0	0	pol	AAC	0	0	0	pol	TTA	0	0	0	pol	ATA	0	0	0
pol	ATA	0	0	0	pol	GGA	0	0	0	pol	GAA	0	0	0	pol	GTA	0	0	0	pol	TTG	0	0	0	pol	AAC	0	0	0	pol	ATA	0	0	0	pol	ATA	0	0	0	pol	ATA	0	0	0	pol	GGT	0	0	0
pol	ATT	0	0	0	pol	AGA	0	0	0	pol	ATG	0	0	0	pol	GGA	0	0	0	pol	ACT	0	0	0	pol	ATA	0	0	0	pol	ATT	0	0	0	pol	ATT	0	0	0	pol	GGA	0	0	0	pol	ACA	0	0	0
pol	GGA	0	0	0	pol	AAT	0	0	0	pol	GAA	0	0	0	pol	CCA	0	0	0	pol	CAG	0	0	0	pol	ATT	0	0	0	pol	GGA	0	0	0	pol	GGA	0	0	0	pol	CCG	0	0	0	pol	GTA	0	0	0
pol	AGA	0	0	0	pol	CTG	0	0	0	pol	AAG	0	0	0	pol	ACA	0	0	0	pol	ATT	0	0	0	pol	GGA	0	0	0	pol	AGA	0	0	0	pol	AGA	0	0	0	pol	ACA	0	0	0	pol	TTA	0	0	0
pol	AAT	0	0	0	pol	TTG	0	0	0	pol	GAA	0	0	0	pol	CCT	0	0	0	pol	GGT	0	0	0	pol	AGA	0	0	0	pol	AAT	0	0	0	pol	AAT	0	0	0	pol	CCT	0	0	0	pol	GTA	0	0	0
pol	TTG	0	0	0	pol	ACT	0	0	0	pol	GGA	0	0	0	pol	GTC	0	0	0	pol	TGC	0	0	0	pol	AAT	0	0	0	pol	CTG	0	0	0	pol	CTG	0	0	0	pol	GTC	0	0	0	pol	GGA	0	0	0
pol	TTG	0	0	0	pol	CAG	0	0	0	pol	AAA	0	0	0	pol	AAC	0	0	0	pol	ACT	0	0	0	pol	CTG	0	0	0	pol	TTG	0	0	0	pol	TTG	0	0	0	pol	AAC	0	0	0	pol	CCT	0	0	0
pol	ACT	0	0	0	pol	CTT	0	0	0	pol	ATC	0	0	0	pol	ATA	0	0	0	pol	TTA	0	0	0	pol	TTG	0	0	0	pol	ACA	0	0	0	pol	ACT	0	0	0	pol	ATA	0	0	0	pol	ACA	0	0	0
pol	CAG	0	0	0	pol	GGT	0	0	0	pol	TCA	0	0	0	pol	ATT	0	0	0	pol	AAT	0	0	0	pol	ACT	0	0	0	pol	CAG	0	0	0	pol	CAG	0	0	0	pol	ATT	0	0	0	pol	CCT	0	0	0
pol	ATT	0	0	0	pol	TGT	0	0	0	pol	AAA	0	0	0	pol	GGA	0	0	0	pol	TTT	0	0	0	pol	CAG	0	0	0	pol	ATT	0	0	0	pol	ATT	0	0	0	pol	GGA	0	0	0	pol	ATC	0	0	0
pol	GGG	0	0	0	pol	ACT	0	0	0	pol	ATT	0	0	0	pol	AGA	0	0	0	pol	CCC	0	0	0	pol	ATT	0	0	0	pol	GGA	0	0	0	pol	GGT	0	0	0	pol	AGA	0	0	0	pol	AAC	0	0	0
pol	TGC	0	0	0	pol	TTA	0	0	0	pol	GGG	0	0	0	pol	AAT	0	0	0	pol	ATT	0	0	0	pol	GGT	0	0	0	pol	TGC	0	0	0	pol	TGC	0	0	0	pol	AAT	0	0	0	pol	ATA	0	0	0
pol	ACT	0	0	0	pol	AAC	0	0	0	pol	CCT	0	0	0	pol	CTA	0	0	0	pol	AGT	0	0	0	pol	TGC	0	0	0	pol	ACT	0	0	0	pol	ACT	0	0	0	pol	CTG	0	0	0	pol	ATT	0	0	0
pol	TTA	0	0	0	pol	TTT	0	0	0	pol	GAA	0	0	0	pol	TTG	0	0	0	pol	CCT	0	0	0	pol	ACT	0	0	0	pol	TTA	0	0	0	pol	TTA	0	0	0	pol	TTG	0	0	0	pol	GGA	0	0	0
pol	AAT	0	0	0	pol	CCC	0	0	0	pol	AAT	0	0	0	pol	ACT	0	0	0	pol	ATT	0	0	0	pol	TTA	0	0	0	pol	AAT	0	0	0	pol	AAT	0	0	0	pol	ACT	0	0	0	pol	AGA	0	0	0
pol	TTT	0	0	0	pol	ATT	0	0	0	pol	CCA	0	0	0	pol	CAG	0	0	0	pol	GAA	0	0	0	pol	AAT	0	0	0	pol	TTT	0	0	0	pol	TTT	0	0	0	pol	CAG	0	0	0	pol	AAT	0	0	0
pol	CCC	0	0	0	pol	AGT	0	0	0	pol	TAC	0	0	0	pol	ATT	0	0	0	pol	ACT	0	0	0	pol	TTT	0	0	0	pol	CCC	0	0	0	pol	CCC	0	0	0	pol	CTT	0	0	0	pol	CTG	0	0	0
pol	ATT	0	0	0	pol	CCT	0	0	0	pol	AAT	0	0	0	pol	GGT	0	0	0	pol	GTA	0	0	0	pol	CCC	0	0	0	pol	ATT	0	0	0	pol	ATT	0	0	0	pol	GGT	0	0	0	pol	TTG	0	0	0
pol	AGT	0	0	0	pol	ATT	0	0	0	pol	ACT	0	0	0	pol	TGC	0	0	0	pol	CCA	0	0	0	pol	ATC	0	0	0	pol	AGT	0	0	0	pol	AGT	0	0	0	pol	TGC	0	0	0	pol	ACT	0	0	0
pol	CCT	0	0	0	pol	GAA	0	0	0	pol	CCA	0	0	0	pol	ACT	0	0	0	pol	GTA	0	0	0	pol	AGT	0	0	0	pol	CCT	0	0	0	pol	CCT	0	0	0	pol	ACT	0	0	0	pol	CAA	0	0	0
pol	ATT	0	0	0	pol	ACT	0	0	0	pol	GTA	0	0	0	pol	TTA	0	0	0	pol	AAA	0	0	0	pol	CCT	0	0	0	pol	ATT	0	0	0	pol	ATT	0	0	0	pol	TTA	0	0	0	pol	ATC	0	0	0
pol	GAA	0	0	0	pol	GTA	0	0	0	pol	TTT	0	0	0	pol	AAT	0	0	0	pol	TTA	0	0	0	pol	ATT	0	0	0	pol	GAA	0	0	0	pol	GAA	0	0	0	pol	AAT	0	0	0	pol	GGT	0	0	0
pol	ACT	0	0	0	pol	CCA	0	0	0	pol	GCT	0	0	0	pol	TTT	0	0	0	pol	AAG	0	0	0	pol	GAA	0	0	0	pol	ACT	0	0	0	pol	ACT	0	0	0	pol	TTT	0	0	0	pol	TGC	0	0	0
pol	GTA	0	0	0	pol	GTA	0	0	0	pol	ATA	0	0	0	pol	CCC	0	0	0	pol	CCA	0	0	0	pol	ACT	0	0	0	pol	GTA	0	0	0	pol	GTA	0	0	0	pol	CCC	0	0	0	pol	ACT	0	0	0
pol	CCA	0	0	0	pol	AAA	0	0	0	pol	AAG	0	0	0	pol	ATT	0	0	0	pol	GGG	0	0	0	pol	GTA	0	0	0	pol	CCA	0	0	0	pol	CCG	0	0	0	pol	ATT	0	0	0	pol	TTA	0	0	0
pol	GTA	0	0	0	pol	TTA	0	0	0	pol	AAA	0	0	0	pol	AGT	0	0	0	pol	ATG	0	0	0	pol	CCA	0	0	0	pol	GTA	0	0	0	pol	GTG	0	0	0	pol	AGT	0	0	0	pol	AAT	0	0	0
pol	AAA	0	0	0	pol	AAG	0	0	0	pol	AAG	0	0	0	pol	CCT	0	0	0	pol	GAT	0	0	0	pol	GTA	0	0	0	pol	AAA	0	0	0	pol	AAA	0	0	0	pol	CCT	0	0	0	pol	TTC	0	0	0
pol	TTA	0	0	0	pol	CCA	0	0	0	pol	GAC	0	0	0	pol	ATT	0	0	0	pol	GGG	0	0	0	pol	AAA	0	0	0	pol	TTA	0	0	0	pol	TTA	0	0	0	pol	ATT	0	0	0	pol	CCC	0	0	0
pol	AAG	0	0	0	pol	GGA	0	0	0	pol	AGT	0	0	0	pol	GAA	0	0	0	pol	CCA	0	0	0	pol	TTA	0	0	0	pol	AAG	0	0	0	pol	AAG	0	0	0	pol	GAA	0	0	0	pol	ATT	0	0	0
pol	CCA	0	0	0	pol	ATG	0	0	0	pol	ACT	0	0	0	pol	ACT	0	0	0	pol	AAA	0	0	0	pol	AAG	0	0	0	pol	CCA	0	0	0	pol	CCA	0	0	0	pol	ACT	0	0	0	pol	AGT	0	0	0
pol	GGG	0	0	0	pol	GAT	0	0	0	pol	AAA	0	0	0	pol	GTA	0	0	0	pol	GTT	0	0	0	pol	CCA	0	0	0	pol	GGG	0	0	0	pol	GGA	0	0	0	pol	GTA	0	0	0	pol	CCT	0	0	0
pol	ATG	0	0	0	pol	GGC	0	0	0	pol	TGG	0	0	0	pol	CCA	0	0	0	pol	AAA	0	0	0	pol	GGA	0	0	0	pol	ATG	0	0	0	pol	ATG	0	0	0	pol	CCA	0	0	0	pol	ATT	0	0	0
pol	GAT	0	0	0	pol	CCA	0	0	0	pol	AGA	0	0	0	pol	GTA	0	0	0	pol	CAA	0	0	0	pol	ATG	0	0	0	pol	GAT	0	0	0	pol	GAT	0	0	0	pol	GTA	0	0	0	pol	GAA	0	0	0
pol	GGC	0	0	0	pol	AAA	0	0	0	pol	AAA	0	0	0	pol	CAA	0	0	0	pol	TGG	0	0	0	pol	GAT	0	0	0	pol	GGC	0	0	0	pol	GGC	0	0	0	pol	AAA	0	0	0	pol	ACT	0	0	0
pol	CCA	0	0	0	pol	GTT	0	0	0	pol	TTA	0	0	0	pol	TTG	0	0	0	pol	CCA	0	0	0	pol	GGC	0	0	0	pol	CCA	0	0	0	pol	CCA	0	0	0	pol	TTA	0	0	0	pol	GTA	0	0	0
pol	AAA	0	0	0	pol	AAA	0	0	0	pol	GTA	0	0	0	pol	AAG	0	0	0	pol	TTG	0	0	0	pol	CCA	0	0	0	pol	AAA	0	0	0	pol	AAA	0	0	0	pol	AAG	0	0	0	pol	CCA	0	0	0
pol	GTT	0	0	0	pol	CAA	0	0	0	pol	GAT	0	0	0	pol	CCA	0	0	0	pol	ACA	0	0	0	pol	AAA	0	0	0	pol	NNN	0	0	0	pol	GTT	0	0	0	pol	CCA	0	0	0	pol	GTC	0	0	0
pol	AAA	0	0	0	pol	TGG	0	0	0	pol	TTC	0	0	0	pol	GGA	0	0	0	pol	GAA	0	0	0	pol	NNN	0	0	0	pol	NNN	0	0	0	pol	AAA	0	0	0	pol	GGA	0	0	0	pol	AAA	0	0	0
pol	CAA	0	0	0	pol	CCA	0	0	0	pol	AGA	0	0	0	pol	ATG	0	0	0	pol	GAA	0	0	0	pol	NNN	0	0	0	pol	NNN	0	0	0	pol	CAA	0	0	0	pol	ATG	0	0	0	pol	TTA	0	0	0
pol	TGG	0	0	0	pol	TTA	0	0	0	pol	GAA	0	0	0	pol	GAT	0	0	0	pol	AAA	0	0	0	pol	NNN	0	0	0	pol	NNN	0	0	0	pol	TGG	0	0	0	pol	GAT	0	0	0	pol	AAG	0	0	0
pol	CCA	0	0	0	pol	ACA	0	0	0	pol	CTT	0	0	0	pol	GGC	0	0	0	pol	ATA	0	0	0	pol	NNN	0	0	0	pol	NNN	0	0	0	pol	CCA	0	0	0	pol	GGC	0	0	0	pol	CCA	0	0	0
pol	TTG	0	0	0	pol	GAA	0	0	0	pol	AAT	0	0	0	pol	CCA	0	0	0	pol	AAA	0	0	0	pol	NNN	0	0	0	pol	NNN	0	0	0	pol	TTA	0	0	0	pol	CCA	0	0	0	pol	GGA	0	0	0
pol	ACA	0	0	0	pol	GAA	0	0	0	pol	AAG	0	0	0	pol	AAA	0	0	0	pol	GCA	0	0	0	pol	NNN	0	0	0	pol	NNN	0	0	0	pol	ACA	0	0	0	pol	AAA	0	0	0	pol	ATG	0	0	0
pol	GAA	0	0	0	pol	AAA	0	0	0	pol	AGA	0	0	0	pol	GTT	0	0	0	pol	TTA	0	0	0	pol	NNN	0	0	0	pol	NNN	0	0	0	pol	GAA	0	0	0	pol	GTT	0	0	0	pol	GAT	0	0	0
pol	GAA	0	0	0	pol	ATA	0	0	0	pol	ACT	0	0	0	pol	AAA	0	0	0	pol	CTA	0	0	0	pol	NNN	0	0	0	pol	NNA	0	0	0	pol	GAA	0	0	0	pol	AAA	0	0	0	pol	GGC	0	0	0
pol	AAA	0	0	0	pol	AAA	0	0	0	pol	CAA	0	0	0	pol	CAA	0	0	0	pol	GAA	0	0	0	pol	NNG	0	0	0	pol	AAA	0	0	0	pol	AAA	0	0	0	pol	CAA	0	0	0	pol	CCA	0	0	0
pol	ATA	0	0	0	pol	GCA	0	0	0	pol	GAT	0	0	0	pol	TGG	0	0	0	pol	ATT	0	0	0	pol	AAA	0	0	0	pol	TTA	0	0	0	pol	ATA	0	0	0	pol	TGG	0	0	0	pol	AAA	0	0	0
pol	AAA	0	0	0	pol	TTA	0	0	0	pol	TTC	0	0	0	pol	CCA	0	0	0	pol	TGT	0	0	0	pol	ATA	0	0	0	pol	AAT	0	0	0	pol	AAA	0	0	0	pol	CCA	0	0	0	pol	NNN	0	0	0
pol	GCA	0	0	0	pol	GTA	0	0	0	pol	TGG	0	0	0	pol	TTG	0	0	0	pol	ACA	0	0	0	pol	AAA	0	0	0	pol	GCA	0	0	0	pol	GCA	0	0	0	pol	TTG	0	0	0	pol	NNN	0	0	0
pol	TTA	0	0	0	pol	GAA	0	0	0	pol	GAA	0	0	0	pol	ACA	0	0	0	pol	GAA	0	0	0	pol	GCA	0	0	0	pol	TTA	0	0	0	pol	TTA	0	0	0	pol	ACA	0	0	0	pol	NNN	0	0	0
pol	GTA	0	0	0	pol	ATT	0	0	0	pol	GTT	0	0	0	pol	GAA	0	0	0	pol	ATG	0	0	0	pol	TTA	0	0	0	pol	ATA	0	0	0	pol	GTA	0	0	0	pol	GAA	0	0	0	pol	NNN	0	0	0
pol	GAA	0	0	0	pol	TGT	0	0	0	pol	CAA	0	0	0	pol	GAA	0	0	0	pol	GAG	0	0	0	pol	GTA	0	0	0	pol	GAA	0	0	0	pol	GAA	0	0	0	pol	GAG	0	0	0	pol	NNN	0	0	0
pol	ATT	0	0	0	pol	ACA	0	0	0	pol	TTA	0	0	0	pol	AAA	0	0	0	pol	AAG	0	0	0	pol	GAA	0	0	0	pol	ATT	0	0	0	pol	ATT	0	0	0	pol	AAA	0	0	0	pol	NNN	0	0	0
pol	TGT	0	0	0	pol	GAA	0	0	0	pol	GGA	0	0	0	pol	ATA	0	0	0	pol	GAA	0	0	0	pol	ATT	0	0	0	pol	TGT	0	0	0	pol	TGT	0	0	0	pol	ATA	0	0	0	pol	NNN	0	0	0
pol	ACA	0	0	0	pol	ATG	0	0	0	pol	ATA	0	0	0	pol	AAA	0	0	0	pol	GGG	0	0	0	pol	TGT	0	0	0	pol	GCA	0	0	0	pol	ACA	0	0	0	pol	AAA	0	0	0	pol	NNN	0	0	0
pol	GAA	0	0	0	pol	GAG	0	0	0	pol	CCA	0	0	0	pol	GCA	0	0	0	pol	AAA	0	0	0	pol	ACA	0	0	0	pol	GAA	0	0	0	pol	GAA	0	0	0	pol	GCA	0	0	0	pol	NNA	0	0	0
pol	ATG	0	0	0	pol	AAG	0	0	0	pol	CAT	0	0	0	pol	TTA	0	0	0	pol	ATT	0	0	0	pol	GAA	0	0	0	pol	ATG	0	0	0	pol	ATG	0	0	0	pol	TTA	0	0	0	pol	AAA	0	0	0
pol	GAA	0	0	0	pol	GAA	0	0	0	pol	CCC	0	0	0	pol	GTA	0	0	0	pol	TCA	0	0	0	pol	ATG	0	0	0	pol	GAA	0	0	0	pol	GAA	0	0	0	pol	GTA	0	0	0	pol	ATA	0	0	0
pol	AAG	0	0	0	pol	GGA	0	0	0	pol	TCA	0	0	0	pol	GAA	0	0	0	pol	AAA	0	0	0	pol	GAA	0	0	0	pol	AAG	0	0	0	pol	AAG	0	0	0	pol	GAA	0	0	0	pol	AAA	0	0	0
pol	GAA	0	0	0	pol	AAA	0	0	0	pol	GGG	0	0	0	pol	ATT	0	0	0	pol	ATT	0	0	0	pol	AAG	0	0	0	pol	GAA	0	0	0	pol	GAA	0	0	0	pol	ATT	0	0	0	pol	GCA	0	0	0
pol	GGA	0	0	0	pol	ATT	0	0	0	pol	TTA	0	0	0	pol	TGT	0	0	0	pol	GGG	0	0	0	pol	GAA	0	0	0	pol	GGA	0	0	0	pol	GGA	0	0	0	pol	TGT	0	0	0	pol	TTG	0	0	0
pol	AAA	0	0	0	pol	TCA	0	0	0	pol	AAA	0	0	0	pol	ACA	0	0	0	pol	CCT	0	0	0	pol	GGC	0	0	0	pol	AAA	0	0	0	pol	AAA	0	0	0	pol	ACA	0	0	0	pol	ACA	0	0	0
pol	ATT	0	0	0	pol	AAA	0	0	0	pol	AAG	0	0	0	pol	GAA	0	0	0	pol	GAA	0	0	0	pol	AAA	0	0	0	pol	ATT	0	0	0	pol	ATT	0	0	0	pol	GAA	0	0	0	pol	GAA	0	0	0
pol	TCA	0	0	0	pol	ATT	0	0	0	pol	AAA	0	0	0	pol	ATG	0	0	0	pol	AAT	0	0	0	pol	ATT	0	0	0	pol	TCA	0	0	0	pol	TCA	0	0	0	pol	ATG	0	0	0	pol	ATC	0	0	0
pol	AGA	0	0	0	pol	GGA	0	0	0	pol	AAA	0	0	0	pol	GAA	0	0	0	pol	CCA	0	0	0	pol	TCA	0	0	0	pol	AAA	0	0	0	pol	AGA	0	0	0	pol	GAA	0	0	0	pol	TGT	0	0	0
pol	ATT	0	0	0	pol	CCT	0	0	0	pol	TCA	0	0	0	pol	AAG	0	0	0	pol	TAC	0	0	0	pol	AAA	0	0	0	pol	ATT	0	0	0	pol	GTA	0	0	0	pol	AAG	0	1	0	pol	GCA	0	0	0
pol	GGG	0	0	0	pol	GAA	0	0	0	pol	GTA	0	0	0	pol	GAA	0	0	0	pol	AAT	0	0	0	pol	ATT	0	0	0	pol	GGG	0	0	0	pol	GGG	0	0	0	pol	GAA	0	0	0	pol	GAG	0	0	0
pol	CCT	0	0	0	pol	AAT	0	0	0	pol	ACA	0	0	0	pol	GGA	0	0	0	pol	ACT	0	0	0	pol	GGG	0	0	0	pol	CCT	0	0	0	pol	CCT	0	0	0	pol	GGG	0	0	0	pol	ATG	0	0	0
pol	GAA	0	0	0	pol	CCA	0	0	0	pol	GTA	0	0	0	pol	AAA	0	0	0	pol	CCA	0	0	0	pol	CCT	0	0	0	pol	GAA	0	0	0	pol	GAA	0	0	0	pol	AAA	0	0	0	pol	GAA	0	0	0
pol	AAT	0	0	0	pol	TAC	0	0	0	pol	CTG	0	0	0	pol	ATT	0	0	0	pol	GTA	0	0	0	pol	GAA	0	0	0	pol	AAT	0	0	0	pol	AAT	0	0	0	pol	ATC	0	0	0	pol	AAA	0	0	0
pol	CCA	0	0	0	pol	AAT	0	0	0	pol	GAT	0	0	0	pol	TCA	0	0	0	pol	TTT	0	0	0	pol	AAT	0	0	0	pol	CCA	0	0	0	pol	CCA	0	0	0	pol	TCA	0	0	0	pol	GAA	0	0	0
pol	TAT	0	0	0	pol	ACT	0	0	0	pol	GTG	0	0	0	pol	AAA	0	0	0	pol	GCA	0	0	0	pol	CCA	0	0	0	pol	TAC	0	0	0	pol	TAC	0	0	0	pol	AAA	0	0	0	pol	GGA	0	0	0
pol	AAT	0	0	0	pol	CCG	0	0	0	pol	GGT	0	0	0	pol	ATT	0	0	0	pol	ATA	0	0	0	pol	TAC	0	0	0	pol	AAT	0	0	0	pol	AAT	0	0	0	pol	ATT	0	0	0	pol	AAA	0	0	0
pol	ACT	0	0	0	pol	GTA	0	0	0	pol	GAT	0	0	0	pol	GGG	0	0	0	pol	AAG	0	0	0	pol	AAT	0	0	0	pol	ACT	0	0	0	pol	ACT	0	0	0	pol	GGA	0	0	0	pol	ATT	0	0	0
pol	CCG	0	0	0	pol	TTT	0	0	0	pol	GCA	0	0	0	pol	CCT	0	0	0	pol	AAA	0	0	0	pol	ACT	0	0	0	pol	CCA	0	0	0	pol	CCA	0	0	0	pol	CCT	0	0	0	pol	TCA	0	0	0
pol	GTA	0	0	0	pol	GCC	0	0	0	pol	TAT	0	0	0	pol	GAA	0	0	0	pol	AAA	0	0	0	pol	CCA	0	0	0	pol	ATA	0	0	0	pol	GTA	0	0	0	pol	GAA	0	0	0	pol	AAA	0	0	0
pol	TTT	0	0	0	pol	ATA	0	0	0	pol	TTT	0	0	0	pol	AAT	0	0	0	pol	GAC	0	0	0	pol	ATA	0	0	0	pol	TTT	0	0	0	pol	TTT	0	0	0	pol	AAC	0	0	0	pol	ATT	0	0	0
pol	GCC	0	0	0	pol	AAG	0	0	0	pol	TCA	0	0	0	pol	CCA	0	0	0	pol	AGT	0	0	0	pol	TTT	0	0	0	pol	GCC	0	0	0	pol	GCT	0	0	0	pol	CCA	0	0	0	pol	GGG	0	0	0
pol	ATA	0	0	0	pol	AAA	0	0	0	pol	GTT	0	0	0	pol	TAC	0	0	0	pol	ACT	0	0	0	pol	GCT	0	0	0	pol	ATA	0	0	0	pol	ATA	0	0	0	pol	TAT	0	0	0	pol	CCC	0	0	0
pol	AAG	0	0	0	pol	AAA	0	0	0	pol	CCC	0	0	0	pol	AAT	0	0	0	pol	AAA	0	0	0	pol	ATA	0	0	0	pol	AAG	0	0	0	pol	AAG	0	0	0	pol	AAT	0	0	0	pol	GAA	0	0	0
pol	AAA	0	0	0	pol	GAC	0	0	0	pol	TTA	0	0	0	pol	ACT	0	0	0	pol	TGG	0	2	3	pol	AAG	0	0	0	pol	AAA	0	0	0	pol	AAA	0	0	0	pol	ACT	0	0	0	pol	AAC	0	0	0
pol	AAG	0	0	0	pol	AGT	0	0	0	pol	GAT	0	0	0	pol	CCA	0	0	0	pol	AGA	0	0	0	pol	AAA	0	0	0	pol	AAA	0	0	0	pol	AAA	0	0	0	pol	CCA	0	0	0	pol	CCA	0	0	0
pol	GAC	0	0	0	pol	ACC	0	0	0	pol	AAA	0	0	0	pol	GTA	0	0	0	pol	AAA	0	0	0	pol	AAA	0	0	0	pol	GAC	0	0	0	pol	GAC	0	0	0	pol	GTA	0	0	0	pol	TAT	0	0	0
pol	AGT	0	0	0	pol	AAA	0	0	0	pol	GAA	0	0	0	pol	TTT	0	0	0	pol	TTA	0	0	0	pol	GAT	0	0	0	pol	AGT	0	0	0	pol	AGT	0	0	0	pol	TTT	0	0	0	pol	AAT	0	0	0
pol	ACT	0	0	0	pol	TGG	0	1	0	pol	TTC	0	0	0	pol	GCC	0	0	0	pol	GTA	0	0	0	pol	AGT	0	0	0	pol	ACT	0	0	0	pol	ACT	0	0	0	pol	GCC	0	0	0	pol	ACT	0	0	0
pol	AAA	0	0	0	pol	AGA	0	0	0	pol	AGG	0	0	0	pol	ATA	0	0	0	pol	GAT	0	0	0	pol	ACT	0	0	0	pol	AAA	0	0	0	pol	AAA	0	0	0	pol	ATA	0	0	0	pol	CCA	0	0	0
pol	TGG	0	1	1	pol	AAA	0	0	0	pol	AAG	0	0	0	pol	AAG	0	0	0	pol	TTC	0	0	0	pol	AAA	0	0	0	pol	TGG	0	1	0	pol	TGG	1	0	1	pol	AAA	0	0	0	pol	GTA	0	0	0
pol	AGA	0	0	0	pol	TTA	0	0	0	pol	TAT	0	0	0	pol	AAA	0	0	0	pol	AGA	0	0	0	pol	TGG	0	0	0	pol	AGA	0	0	0	pol	AGA	0	0	0	pol	AAG	0	0	0	pol	TTT	0	0	0
pol	AAA	0	0	0	pol	GTA	0	0	0	pol	ACT	0	0	0	pol	AAG	0	0	0	pol	GAA	0	0	0	pol	AGA	0	0	0	pol	AAA	0	0	0	pol	AAA	0	0	0	pol	AAA	0	0	0	pol	GCC	0	0	0
pol	TTA	0	0	0	pol	GAT	0	0	0	pol	GCA	0	0	0	pol	GAC	0	0	0	pol	CTT	0	0	0	pol	AAA	0	0	0	pol	TTG	0	0	0	pol	TTA	0	0	0	pol	GAC	0	0	0	pol	ATA	0	0	0
pol	GTA	0	0	0	pol	TTC	0	0	0	pol	TTT	0	0	0	pol	AGT	0	0	0	pol	AAT	0	0	0	pol	TTA	0	0	0	pol	GTA	0	0	0	pol	GTA	0	0	0	pol	AGT	0	0	0	pol	AAG	0	0	0
pol	GAT	0	0	0	pol	AGA	0	0	0	pol	ACC	0	0	0	pol	ACT	0	0	0	pol	AAG	0	0	0	pol	GTA	0	0	0	pol	GAT	0	0	0	pol	GAT	0	0	0	pol	ACT	0	0	0	pol	AAA	0	0	0
pol	TTC	0	0	0	pol	GAG	0	0	0	pol	ATA	0	0	0	pol	AAA	0	0	0	pol	AAA	0	0	0	pol	GAT	0	0	0	pol	TTC	0	0	0	pol	TTC	0	0	0	pol	AAA	0	0	0	pol	AAA	0	0	0
pol	AGA	0	0	0	pol	CTT	0	0	0	pol	CCT	0	0	0	pol	TGG	0	0	0	pol	ACT	0	0	0	pol	TTC	0	0	0	pol	AGA	0	0	0	pol	AGA	0	0	0	pol	TGG	0	2	1	pol	GAC	0	0	0
pol	GAA	0	0	0	pol	AAT	0	0	0	pol	AGT	0	0	0	pol	AGA	0	0	0	pol	CAA	0	0	0	pol	AGA	0	0	0	pol	GAA	0	0	0	pol	GAA	0	0	0	pol	AGA	0	0	0	pol	AGT	0	0	0
pol	CTT	0	0	0	pol	AAG	0	0	0	pol	ACA	0	0	0	pol	AAA	0	0	0	pol	GAC	0	0	0	pol	GAA	0	0	0	pol	CTT	0	0	0	pol	CTT	0	0	0	pol	AAG	0	0	0	pol	ACT	0	0	0
pol	AAT	0	0	0	pol	AGA	0	0	0	pol	AAC	0	0	0	pol	TTA	0	0	0	pol	TTC	0	0	0	pol	CTT	0	0	0	pol	AAT	0	0	0	pol	AAT	0	0	0	pol	TTA	0	0	0	pol	AAA	0	0	0
pol	AAG	0	0	0	pol	ACT	0	0	0	pol	AAT	0	0	0	pol	GTA	0	0	0	pol	TGG	1	6	1	pol	AAT	0	0	0	pol	AAG	0	0	0	pol	AAA	0	0	0	pol	GTA	0	0	0	pol	TGG	1	2	0
pol	AAA	0	0	0	pol	CAA	0	0	0	pol	GAG	0	0	0	pol	GAT	0	0	0	pol	GAA	0	0	0	pol	AAG	0	0	0	pol	AGA	0	0	0	pol	AGA	0	0	0	pol	GAT	0	0	0	pol	AGA	0	0	0
pol	ACT	0	0	0	pol	GAC	0	0	0	pol	ACA	0	0	0	pol	TTC	0	0	0	pol	GTT	0	0	0	pol	AGG	0	0	0	pol	ACT	0	0	0	pol	ACT	0	0	0	pol	TTC	0	0	0	pol	AAA	0	0	0
pol	CAA	0	0	0	pol	TTC	0	0	0	pol	CCA	0	0	0	pol	AGA	0	0	0	pol	CAG	0	0	0	pol	ACT	0	0	0	pol	CAA	0	0	0	pol	CAA	0	0	0	pol	AGA	0	0	0	pol	TTA	0	0	0
pol	GAC	0	0	0	pol	TGG	1	1	0	pol	GGG	0	0	0	pol	GAA	0	0	0	pol	TTA	0	0	0	pol	CAA	0	0	0	pol	GAC	0	0	0	pol	GAC	0	0	0	pol	GAA	0	0	0	pol	GTA	0	0	0
pol	TTC	0	0	0	pol	GAA	0	0	0	pol	ATG	0	0	0	pol	CTT	0	0	0	pol	GGA	0	0	0	pol	GAC	0	0	0	pol	TTC	0	0	0	pol	TTT	0	0	0	pol	CTC	0	0	0	pol	GAT	0	0	0
pol	TGG	1	3	0	pol	GTT	0	0	0	pol	AGA	0	0	0	pol	AAT	0	0	0	pol	ATA	0	0	0	pol	TTC	0	0	0	pol	TGG	1	1	0	pol	TGG	2	0	0	pol	AAT	0	0	0	pol	TTT	0	0	0
pol	GAA	0	0	0	pol	CAA	0	0	0	pol	TAC	0	0	0	pol	AAA	0	0	0	pol	CCA	0	0	0	pol	TGG	0	1	0	pol	GAA	0	0	0	pol	GAA	0	0	0	pol	AAG	0	0	0	pol	AGA	0	0	0
pol	GTT	0	0	0	pol	TTA	0	0	0	pol	CAG	0	0	0	pol	AGA	0	0	0	pol	CAT	0	0	0	pol	GAA	0	0	0	pol	ATT	0	0	0	pol	GTT	0	0	0	pol	AGA	0	0	0	pol	GAA	0	0	0
pol	CAA	0	0	0	pol	GGA	0	0	0	pol	TAC	0	0	0	pol	ACT	0	0	0	pol	CCC	0	0	0	pol	GTT	0	0	0	pol	CAA	0	0	0	pol	CAA	0	0	0	pol	ACT	0	0	0	pol	CTT	0	0	0
pol	TTA	0	0	0	pol	ATA	0	0	0	pol	AAT	0	0	0	pol	CAA	0	0	0	pol	GCA	0	0	0	pol	CAA	0	0	0	pol	TTA	0	0	0	pol	TTA	0	0	0	pol	CAA	0	0	0	pol	AAT	0	0	0
pol	GGA	0	0	0	pol	CCA	0	0	0	pol	GTG	0	0	0	pol	GAC	0	0	0	pol	GGG	0	0	0	pol	TTA	0	0	0	pol	GGA	0	0	0	pol	GGG	0	0	0	pol	GAC	0	0	0	pol	AAG	0	0	0
pol	ATA	0	0	0	pol	CAT	0	0	0	pol	CTT	0	0	0	pol	TTC	0	0	0	pol	TTA	0	0	0	pol	GGA	0	0	0	pol	ATA	0	0	0	pol	ATA	0	0	0	pol	TTC	0	0	0	pol	AGA	0	0	0
pol	CCA	0	0	0	pol	CCC	0	0	0	pol	CCA	0	0	0	pol	TGG	0	0	0	pol	AAA	0	0	0	pol	ATA	0	0	0	pol	CCA	0	0	0	pol	CCA	0	0	0	pol	TGG	1	1	1	pol	ACT	0	0	0
pol	CAT	0	0	0	pol	GCA	0	0	0	pol	CAG	0	0	0	pol	GAG	0	0	0	pol	AAG	0	0	0	pol	CCA	0	0	0	pol	CAT	0	0	0	pol	CAT	0	0	0	pol	GAA	0	0	0	pol	CAA	0	0	0
pol	CCC	0	0	0	pol	GGG	0	0	0	pol	GGA	0	0	0	pol	GTT	0	0	0	pol	AAA	0	0	0	pol	CAT	0	0	0	pol	CCT	0	0	0	pol	CCC	0	0	0	pol	GTC	0	0	0	pol	GAC	0	0	0
pol	GCA	0	0	0	pol	TTA	0	0	0	pol	TGG	0	0	0	pol	CAA	0	0	0	pol	AAA	0	0	0	pol	CCC	0	0	0	pol	TCA	0	0	0	pol	GCA	0	0	0	pol	CAA	0	0	0	pol	TTC	0	0	0
pol	GGG	0	0	0	pol	AAA	0	0	0	pol	AAA	0	0	0	pol	TTA	0	0	0	pol	TCA	0	0	0	pol	GCA	0	0	0	pol	GGG	0	0	0	pol	GGG	0	0	0	pol	TTA	0	0	0	pol	TGG	1	4	0
pol	TTA	0	0	0	pol	AAG	0	0	0	pol	GGA	0	0	0	pol	GGA	0	0	0	pol	GTA	0	0	0	pol	GGG	0	0	0	pol	TTA	0	0	0	pol	TTG	0	0	0	pol	GGA	0	0	0	pol	GAA	0	0	0
pol	AAA	0	0	0	pol	AAA	0	0	0	pol	TCA	0	0	0	pol	ATA	0	0	0	pol	ACA	0	0	0	pol	TTA	0	0	0	pol	AAA	0	0	0	pol	AAA	0	0	0	pol	ATA	0	0	0	pol	GTT	0	0	0
pol	AAG	0	0	0	pol	AAA	0	0	0	pol	CCA	0	0	0	pol	CCA	0	0	0	pol	GTA	0	0	0	pol	AAA	0	0	0	pol	CAG	0	0	0	pol	AAG	0	0	0	pol	CCA	0	0	0	pol	CAA	0	0	0
pol	AGA	0	0	0	pol	TCA	0	0	0	pol	GCA	0	0	0	pol	CAT	0	0	0	pol	CTG	0	0	0	pol	AAG	0	0	0	pol	AAA	0	0	0	pol	AAA	0	0	0	pol	CAT	0	0	0	pol	TTA	0	0	0
pol	AAA	0	0	0	pol	GTA	0	0	0	pol	ATA	0	0	0	pol	CCT	0	0	0	pol	GAT	0	0	0	pol	AAA	0	0	0	pol	AAA	0	0	0	pol	AAA	0	0	0	pol	CCC	0	0	0	pol	GGA	0	0	0
pol	TCA	0	0	0	pol	ACA	0	0	0	pol	TTT	0	0	0	pol	GCA	0	0	0	pol	GTA	0	0	0	pol	AAA	0	0	0	pol	TCA	0	0	0	pol	TCA	0	0	0	pol	GCA	0	0	0	pol	ATA	0	0	0
pol	GTA	0	0	0	pol	GTA	0	0	0	pol	CAA	0	0	0	pol	GGG	0	0	0	pol	GGT	0	0	0	pol	TCA	0	0	0	pol	GTA	0	0	0	pol	GTA	0	0	0	pol	GGG	0	0	0	pol	CCA	0	0	0
pol	ACA	0	0	0	pol	CTG	0	0	0	pol	AGT	0	0	0	pol	TTA	0	0	0	pol	GAT	0	0	0	pol	GTG	0	0	0	pol	ACA	0	0	0	pol	ACA	0	0	0	pol	TTA	0	0	0	pol	CAT	0	0	0
pol	GTA	0	0	0	pol	GAT	0	0	0	pol	AGC	0	0	0	pol	AAA	0	0	0	pol	GCA	0	0	0	pol	ACA	0	0	0	pol	GTA	0	0	0	pol	GTT	0	0	0	pol	AAA	0	0	0	pol	CCT	0	0	0
pol	CTG	0	0	0	pol	GTG	0	0	0	pol	ATG	0	0	0	pol	AAG	0	0	0	pol	TAT	0	0	0	pol	GTA	0	0	0	pol	TTG	0	0	0	pol	CTG	0	0	0	pol	CAG	0	0	0	pol	TCA	0	0	0
pol	GAT	0	0	0	pol	GGT	0	0	0	pol	ACA	0	0	0	pol	AAG	0	0	0	pol	TTT	0	0	0	pol	CTG	0	0	0	pol	GAT	0	0	0	pol	GAC	0	0	0	pol	AAA	0	0	0	pol	GGG	0	0	0
pol	GTG	0	0	0	pol	GAT	0	0	0	pol	AAA	0	0	0	pol	AAA	0	0	0	pol	TCA	0	0	0	pol	GAT	0	0	0	pol	GTG	0	0	0	pol	GTG	0	0	0	pol	AAA	0	0	0	pol	TTA	0	0	0
pol	GGT	0	0	0	pol	GCA	0	0	0	pol	ATA	0	0	0	pol	TCA	0	0	0	pol	GTT	0	0	0	pol	GTG	0	0	0	pol	GGT	0	0	0	pol	GGT	0	0	0	pol	TCA	0	0	0	pol	AAA	0	0	0
pol	GAT	0	0	0	pol	TAT	0	0	0	pol	TTA	0	0	0	pol	ATA	0	0	0	pol	CCT	0	0	0	pol	GGT	0	0	0	pol	GAT	0	0	0	pol	GAT	0	0	0	pol	GTA	0	0	0	pol	AAG	0	0	0
pol	GCA	0	0	0	pol	TTT	0	0	0	pol	GAA	0	0	0	pol	ACA	0	0	0	pol	TTA	0	0	0	pol	GAT	0	0	0	pol	GCA	0	0	0	pol	GCG	0	0	0	pol	ACA	0	0	0	pol	AAA	0	0	0
pol	TAT	0	0	0	pol	TCA	0	0	0	pol	CCT	0	0	0	pol	GTA	0	0	0	pol	GAT	0	0	0	pol	GCA	0	0	0	pol	TAT	0	0	0	pol	TAT	0	0	0	pol	GTA	0	0	0	pol	AAA	0	0	0
pol	TTT	0	0	0	pol	GTT	0	0	0	pol	TTT	0	0	0	pol	CTA	0	0	0	pol	GAA	0	0	0	pol	TAT	0	0	0	pol	TTT	0	0	0	pol	TTC	0	0	0	pol	CTG	0	0	0	pol	TCA	0	0	0
pol	TCA	0	0	0	pol	CCC	0	0	0	pol	AGA	0	0	0	pol	GAT	0	0	0	pol	AGC	0	0	0	pol	TTT	0	0	0	pol	TCA	0	0	0	pol	TCA	0	0	0	pol	GAT	0	0	0	pol	GTA	0	0	0
pol	GTT	0	0	0	pol	TTA	0	0	0	pol	AAA	0	0	0	pol	GTA	0	0	0	pol	TTC	0	0	0	pol	TCA	0	0	0	pol	GTT	0	0	0	pol	GTT	0	0	0	pol	GTG	0	0	0	pol	ACA	0	0	0
pol	CCC	0	0	0	pol	GAT	0	0	0	pol	CAA	0	0	0	pol	GGT	0	0	0	pol	AGG	0	0	0	pol	GTT	0	0	0	pol	CCC	0	0	0	pol	CCC	0	0	0	pol	GGT	0	0	0	pol	GTA	0	0	0
pol	TTA	0	0	0	pol	AAA	0	0	0	pol	AAC	0	0	0	pol	GAT	0	0	0	pol	AAG	0	0	0	pol	CCC	0	0	0	pol	TTA	0	0	0	pol	TTA	0	0	0	pol	GAT	0	0	0	pol	TTG	0	0	0
pol	GAT	0	0	0	pol	GAA	0	0	0	pol	CCA	0	0	0	pol	GCA	0	0	0	pol	TAT	0	0	0	pol	TTA	0	0	0	pol	GAT	0	0	0	pol	GAT	0	0	0	pol	GCA	0	0	0	pol	GAT	0	0	0
pol	GAA	0	0	0	pol	TTC	0	0	0	pol	GAC	0	0	0	pol	TAT	0	0	0	pol	ACT	0	0	0	pol	GAT	0	0	0	pol	AAA	0	0	0	pol	AAA	0	0	0	pol	TAT	0	0	0	pol	GTG	0	0	0
pol	GAC	0	0	0	pol	AGA	0	0	0	pol	ATA	0	0	0	pol	TTT	0	0	0	pol	GCA	0	0	0	pol	CAA	0	0	0	pol	GAC	0	0	0	pol	GAC	0	0	0	pol	TTT	0	0	0	pol	GGT	0	0	0
pol	TTC	0	0	0	pol	AAG	0	0	0	pol	GTT	0	0	0	pol	TCA	0	0	0	pol	TTT	0	0	0	pol	GAC	0	0	0	pol	TTT	0	0	0	pol	TTC	0	0	0	pol	TCA	0	0	0	pol	GAT	0	0	0
pol	AGG	0	0	0	pol	TAT	0	0	0	pol	ATC	0	0	0	pol	GTT	0	0	0	pol	ACC	0	0	0	pol	TTC	0	0	0	pol	AGG	0	0	0	pol	AGG	0	0	0	pol	GTT	0	0	0	pol	GCA	0	0	0
pol	AAG	0	0	0	pol	ACA	0	0	0	pol	TAT	0	0	0	pol	CCC	0	0	0	pol	ATA	0	0	0	pol	AGG	0	0	0	pol	AAG	0	0	0	pol	AAG	0	0	0	pol	CCT	0	0	0	pol	TAT	0	0	0
pol	TAT	0	0	0	pol	GCA	0	0	0	pol	CAA	0	0	0	pol	TTA	0	0	0	pol	CCT	0	0	0	pol	AAG	0	0	0	pol	TAT	0	0	0	pol	TAT	0	0	0	pol	TTA	0	0	0	pol	TTC	0	0	0
pol	ACT	0	0	0	pol	TTT	0	0	0	pol	TAC	0	0	0	pol	CAT	0	0	0	pol	AGT	0	0	0	pol	TAT	0	0	0	pol	ACT	0	0	0	pol	ACT	0	0	0	pol	GAT	0	0	0	pol	TCA	0	0	0
pol	GCA	0	0	0	pol	ACT	0	0	0	pol	ATG	0	0	0	pol	GAA	0	0	0	pol	ATA	0	0	0	pol	ACT	0	0	0	pol	GCA	0	0	0	pol	GCA	0	0	0	pol	AAA	0	0	0	pol	GTT	0	0	0
pol	TTT	0	0	0	pol	ATA	0	0	0	pol	GAT	0	0	0	pol	AGT	0	0	0	pol	AAT	0	0	0	pol	GCA	0	0	0	pol	TTT	0	0	0	pol	TTC	0	0	0	pol	GAC	0	0	0	pol	CCT	0	0	0
pol	ACC	0	0	0	pol	CCT	0	0	0	pol	GAT	0	0	0	pol	TTC	0	0	0	pol	AAT	0	0	0	pol	TTT	0	0	0	pol	ACC	0	0	0	pol	ACC	0	0	0	pol	TTC	0	0	0	pol	TTA	0	0	0
pol	ATA	0	0	0	pol	AGT	0	0	0	pol	TTG	0	0	0	pol	AGG	0	0	0	pol	GAG	0	0	0	pol	ACC	0	0	0	pol	ATA	0	0	0	pol	ATA	0	0	0	pol	AGG	0	0	0	pol	GAT	0	0	0
pol	CCT	0	0	0	pol	ACA	0	0	0	pol	TAT	0	0	0	pol	AAG	0	0	0	pol	ACA	0	0	0	pol	ATA	0	0	0	pol	CCT	0	0	0	pol	CCC	0	0	0	pol	AAG	0	0	0	pol	GAA	0	0	0
pol	AGT	0	0	0	pol	AAC	0	0	0	pol	GTA	0	0	0	pol	TAT	0	0	0	pol	CCA	0	0	0	pol	CCT	0	0	0	pol	AGT	0	0	0	pol	AGT	0	0	0	pol	TAT	0	0	0	pol	CAC	0	0	0
pol	ACA	0	0	0	pol	AAT	0	0	0	pol	GGA	0	0	0	pol	ACT	0	0	0	pol	GGA	0	0	0	pol	AGT	0	0	0	pol	GTG	0	0	0	pol	ATA	0	0	0	pol	ACT	0	0	0	pol	TTC	0	0	0
pol	AAC	0	0	0	pol	GAG	0	0	0	pol	TCT	0	0	0	pol	GCA	0	0	0	pol	ATT	0	0	0	pol	ATA	0	0	0	pol	AAC	0	0	0	pol	AAC	0	0	0	pol	GCA	0	0	0	pol	AGG	0	0	0
pol	AAT	0	0	0	pol	ACA	0	0	0	pol	GAC	0	0	0	pol	TTT	0	0	0	pol	AGA	0	0	0	pol	AAC	0	0	0	pol	AAT	0	0	0	pol	AAT	0	0	0	pol	TTT	0	0	0	pol	AAG	0	0	0
pol	GAG	0	0	0	pol	CCA	0	0	0	pol	TTA	0	0	0	pol	ACC	0	0	0	pol	TAT	0	0	0	pol	AAT	0	0	0	pol	GAG	0	0	0	pol	GAG	0	0	0	pol	ACC	0	0	0	pol	TAT	0	0	0
pol	ACA	0	0	0	pol	GGG	0	0	0	pol	GAA	0	0	0	pol	ATA	0	0	0	pol	CAG	0	0	0	pol	GAG	0	0	0	pol	AAA	0	0	0	pol	ACA	0	0	0	pol	ATA	0	0	0	pol	ACT	0	0	0
pol	CCA	0	0	0	pol	ATT	0	0	0	pol	TTA	0	0	0	pol	CCT	0	0	0	pol	TAC	0	0	0	pol	ACA	0	0	0	pol	CCA	0	0	0	pol	CCA	0	0	0	pol	CCT	0	0	0	pol	GCA	0	0	0
pol	GGG	0	0	0	pol	AGA	0	0	0	pol	GGG	0	0	0	pol	AGT	0	0	0	pol	AAT	0	0	0	pol	CCA	0	0	0	pol	GCA	0	0	0	pol	GGA	0	0	0	pol	AGT	0	0	0	pol	TTT	0	0	0
pol	ATT	0	0	0	pol	TAT	0	0	0	pol	CAG	0	0	0	pol	ATA	0	0	0	pol	GTG	0	0	0	pol	GGG	0	0	0	pol	ATT	0	0	0	pol	ATT	0	0	0	pol	AGA	0	0	0	pol	ACC	0	0	0
pol	AGA	0	0	0	pol	CAG	0	0	0	pol	CAC	0	0	0	pol	AAC	0	0	0	pol	CTT	0	0	0	pol	GTT	0	0	0	pol	AGA	0	0	0	pol	AGA	0	0	0	pol	AAC	0	0	0	pol	ATA	0	0	0
pol	TAT	0	0	0	pol	TAC	0	0	0	pol	AGA	0	0	0	pol	AAT	0	0	0	pol	CCA	0	0	0	pol	AGA	0	0	0	pol	TAT	0	0	0	pol	TAT	0	0	0	pol	AAT	0	0	0	pol	CCT	0	0	0
pol	CAG	0	0	0	pol	AAT	0	0	0	pol	GCA	0	0	0	pol	GCG	0	0	0	pol	CAG	0	0	0	pol	TAT	0	0	0	pol	CAG	0	0	0	pol	CAG	0	0	0	pol	GAG	0	0	0	pol	AGT	0	0	0
pol	TAC	0	0	0	pol	GTG	0	0	0	pol	AAA	0	0	0	pol	ACA	0	0	0	pol	GGA	0	0	0	pol	CAG	0	0	0	pol	TAC	0	0	0	pol	TAC	0	0	0	pol	ACA	0	0	0	pol	ATA	0	0	0
pol	AAT	0	0	0	pol	CTT	0	0	0	pol	ATA	0	0	0	pol	CCA	0	0	0	pol	TGG	0	2	0	pol	TAC	0	0	0	pol	AAT	0	0	0	pol	AAT	0	0	0	pol	CCA	0	0	0	pol	AAC	0	0	0
pol	GTG	0	0	0	pol	CCA	0	0	0	pol	GAG	0	0	0	pol	GGA	0	0	0	pol	AAA	0	0	0	pol	AAT	0	0	0	pol	GTG	0	0	0	pol	GTG	0	0	0	pol	GGG	0	0	0	pol	AAT	0	0	0
pol	CTT	0	0	0	pol	CAG	0	0	0	pol	GAA	0	0	0	pol	ATC	0	0	0	pol	GGA	0	0	0	pol	GTG	0	0	0	pol	CTT	0	0	0	pol	CTT	0	0	0	pol	ATT	0	0	0	pol	GAG	0	0	0
pol	CCA	0	0	0	pol	GGA	0	0	0	pol	TTA	0	0	0	pol	AGA	0	0	0	pol	TCA	0	0	0	pol	CTT	0	0	0	pol	CCA	0	0	0	pol	CCA	0	0	0	pol	AGA	0	0	0	pol	ACA	0	0	0
pol	CAG	0	0	0	pol	TGG	0	1	0	pol	AGA	0	0	0	pol	TAC	0	0	0	pol	CCA	0	0	0	pol	CCA	0	0	0	pol	CAG	0	0	0	pol	CAG	0	0	0	pol	TAT	0	0	0	pol	CCA	0	0	0
pol	GGA	0	0	0	pol	AAA	0	0	0	pol	CAA	0	0	0	pol	CAG	0	0	0	pol	GCA	0	0	0	pol	CAG	0	0	0	pol	GGA	0	0	0	pol	GGA	0	0	0	pol	CAG	0	0	0	pol	GGG	0	0	0
pol	TGG	1	2	0	pol	GGA	0	0	0	pol	CAT	0	0	0	pol	TAC	0	0	0	pol	ATA	0	0	0	pol	GGA	0	0	0	pol	TGG	0	1	0	pol	TGG	0	1	0	pol	TAC	0	0	0	pol	ATT	0	0	0
pol	AAG	0	0	0	pol	TCA	0	0	0	pol	CTG	0	0	0	pol	AAT	0	0	0	pol	TTC	0	0	0	pol	TGG	0	0	0	pol	AAA	0	0	0	pol	AAA	0	0	0	pol	AAT	0	0	0	pol	AGA	0	0	0
pol	GGA	0	0	0	pol	CCA	0	0	0	pol	TTG	0	0	0	pol	GTG	0	0	0	pol	CAA	0	0	0	pol	AAA	0	0	0	pol	GGA	0	0	0	pol	GGA	0	0	0	pol	GTA	0	0	0	pol	TAT	0	0	0
pol	TCA	0	0	0	pol	GCA	0	0	0	pol	AAG	0	0	0	pol	CTT	0	0	0	pol	AGT	0	0	0	pol	GGA	0	0	0	pol	TCA	0	0	0	pol	TCA	0	0	0	pol	TTG	0	0	0	pol	CAG	0	0	0
pol	CCA	0	0	0	pol	ATA	0	0	0	pol	TGG	0	0	0	pol	CCA	0	0	0	pol	AGC	0	0	0	pol	TCA	0	0	0	pol	CCA	0	0	0	pol	CCA	0	0	0	pol	CCA	0	0	0	pol	TAT	0	0	0
pol	GCA	0	0	0	pol	TTC	0	0	0	pol	GGA	0	0	0	pol	CAA	0	0	0	pol	ATG	0	0	0	pol	CCA	0	0	0	pol	GCA	0	0	0	pol	GCA	0	0	0	pol	CAA	0	0	0	pol	AAT	0	0	0
pol	ATA	0	0	0	pol	CAA	0	0	0	pol	TTT	0	0	0	pol	GGA	0	0	0	pol	ACA	0	0	0	pol	GCA	0	0	0	pol	ATA	0	0	0	pol	ATA	0	0	0	pol	GGA	0	0	0	pol	GTG	0	0	0
pol	TTC	0	0	0	pol	AGT	0	0	0	pol	ACC	0	0	0	pol	TGG	0	0	0	pol	AAA	0	0	0	pol	ATA	0	0	0	pol	TTC	0	0	0	pol	TTC	0	0	0	pol	TGG	0	3	0	pol	CTT	0	0	0
pol	CAA	0	0	0	pol	AGC	0	0	0	pol	ACA	0	0	0	pol	AAA	0	0	0	pol	ATC	0	0	0	pol	TTC	0	0	0	pol	CAA	0	0	0	pol	CAA	0	0	0	pol	AAA	0	0	0	pol	CCA	0	0	0
pol	AGT	0	0	0	pol	ATG	0	0	0	pol	CCA	0	0	0	pol	GGA	0	0	0	pol	TTA	0	0	0	pol	CAA	0	0	0	pol	AGT	0	0	0	pol	AGT	0	0	0	pol	GGA	0	0	0	pol	CAG	0	0	0
pol	AGC	0	0	0	pol	ACA	0	0	0	pol	GAT	0	0	0	pol	TCA	0	0	0	pol	GAG	0	0	0	pol	GCT	0	0	0	pol	AGC	0	0	0	pol	AGC	0	0	0	pol	TCA	0	0	0	pol	GGA	0	0	0
pol	ATG	0	0	0	pol	AAA	0	0	0	pol	AAA	0	0	0	pol	CCA	0	0	0	pol	CCT	0	0	0	pol	AGC	0	0	0	pol	ATG	0	0	0	pol	ATG	0	0	0	pol	CCA	0	0	0	pol	TGG	1	5	0
pol	ACA	0	0	0	pol	ATC	0	0	0	pol	AAA	0	0	0	pol	GCA	0	0	0	pol	TTT	0	0	0	pol	ATG	0	0	0	pol	ACA	0	0	0	pol	ACA	0	0	0	pol	GCA	0	0	0	pol	AAA	0	0	0
pol	AAA	0	0	0	pol	TTA	0	0	0	pol	CAT	0	0	0	pol	ATA	0	0	0	pol	AGA	0	0	0	pol	ACA	0	0	0	pol	AAA	0	0	0	pol	AAA	0	0	0	pol	ATA	0	0	0	pol	GGA	0	0	0
pol	ATC	0	0	0	pol	GAG	0	0	0	pol	CAG	0	0	0	pol	TTC	0	0	0	pol	AAA	0	0	0	pol	AAA	0	0	0	pol	ATC	0	0	0	pol	ATT	0	0	0	pol	TTT	0	0	0	pol	TCA	0	0	0
pol	TTA	0	0	0	pol	CCT	0	0	0	pol	AAA	0	0	0	pol	CAA	0	0	0	pol	CAA	0	0	0	pol	ATC	0	0	0	pol	TTA	0	0	0	pol	TTA	0	0	0	pol	CAA	0	0	0	pol	CCA	0	0	0
pol	GAT	0	0	0	pol	TTT	0	0	0	pol	GAA	0	0	0	pol	TGT	0	0	0	pol	AAT	0	0	0	pol	TTA	0	0	0	pol	GAG	0	0	0	pol	GAG	0	0	0	pol	TGT	0	0	0	pol	GCA	0	0	0
pol	CCT	0	0	0	pol	AGG	0	0	0	pol	CCT	0	0	0	pol	AGC	0	0	0	pol	CCA	0	0	0	pol	GAG	0	0	0	pol	CCT	0	0	0	pol	CCT	0	0	0	pol	AGT	0	0	0	pol	ATA	0	0	0
pol	TTT	0	0	0	pol	AAA	0	0	0	pol	CCA	0	0	0	pol	ATG	0	0	0	pol	GAC	0	0	0	pol	CCT	0	0	0	pol	TTT	0	0	0	pol	TTT	0	0	0	pol	ATG	0	0	0	pol	TTC	0	0	0
pol	AGA	0	0	0	pol	CAA	0	0	0	pol	TTC	0	0	0	pol	ACA	0	0	0	pol	ATG	0	0	0	pol	TTT	0	0	0	pol	AGA	0	0	0	pol	AGA	0	0	0	pol	ACA	0	0	0	pol	CAA	0	0	0
pol	AAA	0	0	0	pol	AAT	0	0	0	pol	CTT	0	0	0	pol	AAA	0	0	0	pol	GTC	0	0	0	pol	AGA	0	0	0	pol	AAA	0	0	0	pol	AAA	0	0	0	pol	AAG	0	0	0	pol	AGC	0	0	0
pol	CAA	0	0	0	pol	CCA	0	0	0	pol	TGG	0	0	0	pol	ATC	0	0	0	pol	ATC	0	0	0	pol	AAA	0	0	0	pol	CAA	0	0	0	pol	CAA	0	0	0	pol	ATC	0	0	0	pol	AGC	0	0	0
pol	AAT	0	0	0	pol	GAA	0	0	0	pol	ATG	0	0	0	pol	TTA	0	0	0	pol	TAT	0	0	0	pol	CGA	0	0	0	pol	AAT	0	0	0	pol	AAT	0	0	0	pol	TTA	0	0	0	pol	ATG	0	0	0
pol	CCA	0	0	0	pol	ATA	0	0	0	pol	GGT	0	0	0	pol	GAG	0	0	0	pol	CAA	0	0	0	pol	AAT	0	0	0	pol	CCA	0	0	0	pol	CCA	0	0	0	pol	GAG	0	0	0	pol	ACA	0	0	0
pol	GAC	0	0	0	pol	GTT	0	0	0	pol	TAT	0	0	0	pol	CCT	0	0	0	pol	TAC	0	0	0	pol	CCA	0	0	0	pol	GAC	0	0	0	pol	GAC	0	0	0	pol	CCT	0	0	0	pol	AAA	0	0	0
pol	ATA	0	0	0	pol	ATC	0	0	0	pol	GAA	0	0	0	pol	TTT	0	0	0	pol	ATG	0	0	0	pol	GAT	0	0	0	pol	ATG	0	0	0	pol	ATA	0	0	0	pol	TTT	0	0	0	pol	ATC	0	0	0
pol	GTT	0	0	0	pol	TAT	0	0	0	pol	CTC	0	0	0	pol	AGA	0	0	0	pol	GAT	0	0	0	pol	ATA	0	0	0	pol	GTT	0	0	0	pol	GTT	0	0	0	pol	AGA	0	0	0	pol	TTA	0	0	0
pol	ATC	0	0	0	pol	CAA	0	0	0	pol	CAT	0	0	0	pol	AAA	0	0	0	pol	GAC	0	0	0	pol	GTC	0	0	0	pol	ATC	0	0	0	pol	ATC	0	0	0	pol	AAA	0	0	0	pol	GAG	0	0	0
pol	TAT	0	0	0	pol	TAC	0	0	0	pol	CCT	0	0	0	pol	AAG	0	0	0	pol	TTG	0	0	0	pol	ATC	0	0	0	pol	TAT	0	0	0	pol	TAT	0	0	0	pol	CAG	0	0	0	pol	CCT	0	0	0
pol	CAA	0	0	0	pol	ATG	0	0	0	pol	GAT	0	0	0	pol	AAT	0	0	0	pol	TAT	0	0	0	pol	TAT	0	0	0	pol	CAA	0	0	0	pol	CAA	0	0	0	pol	AAT	0	0	0	pol	TTT	0	0	0
pol	TAC	0	0	0	pol	GAT	0	0	0	pol	AAA	0	0	0	pol	CCA	0	0	0	pol	GTA	0	0	0	pol	CAA	0	0	0	pol	TAC	0	0	0	pol	TAC	0	0	0	pol	CCA	0	0	0	pol	AGA	0	0	0
pol	ATG	0	0	0	pol	GAT	0	0	0	pol	TGG	0	0	0	pol	GAC	0	0	0	pol	GGA	0	0	0	pol	TAC	0	0	0	pol	ATG	0	0	0	pol	ATG	0	0	0	pol	GAC	0	0	0	pol	AAA	0	0	0
pol	GAT	0	0	0	pol	TTG	0	0	0	pol	ACA	0	0	0	pol	ATA	0	0	0	pol	TCT	0	0	0	pol	ATG	0	0	0	pol	GAT	0	0	0	pol	GAT	0	0	0	pol	CTA	0	0	0	pol	CAA	0	0	0
pol	GAT	0	0	0	pol	TAT	0	0	0	pol	GTA	0	0	0	pol	GTT	0	0	0	pol	GAC	0	0	0	pol	GAT	0	0	0	pol	GAT	0	0	0	pol	GAC	0	0	0	pol	GTT	0	0	0	pol	AAT	0	0	0
pol	CTG	0	0	0	pol	GTA	0	0	0	pol	CAG	0	0	0	pol	ATC	0	0	0	pol	TTA	0	0	0	pol	GAT	0	0	0	pol	TTG	0	0	0	pol	TTG	0	0	0	pol	ATC	0	0	0	pol	CCA	0	0	0
pol	TAT	0	0	0	pol	GGA	0	0	0	pol	CCT	0	0	0	pol	TAT	0	0	0	pol	GAA	0	0	0	pol	CTA	0	0	0	pol	TAT	0	0	0	pol	TAT	0	0	0	pol	TAT	0	0	0	pol	GAC	0	0	0
pol	GTA	0	0	0	pol	TCT	0	0	0	pol	ATA	0	0	0	pol	CAA	0	0	0	pol	ATA	0	0	0	pol	TAT	0	0	0	pol	GTC	0	0	0	pol	GTA	0	0	0	pol	CAA	0	0	0	pol	ATG	0	0	0
pol	GGA	0	0	0	pol	GAT	0	0	0	pol	GTG	0	0	0	pol	TAC	0	0	0	pol	GGA	0	0	0	pol	GTA	0	0	0	pol	GGA	0	0	0	pol	GGA	0	0	0	pol	TAC	0	0	0	pol	GTT	0	0	0
pol	TCT	0	0	0	pol	TTA	0	0	0	pol	CTG	0	0	0	pol	ATG	0	0	0	pol	CAA	0	0	0	pol	GGA	0	0	0	pol	TCT	0	0	0	pol	TCT	0	0	0	pol	ATG	0	0	0	pol	ATC	0	0	0
pol	GAC	0	0	0	pol	GAA	0	0	0	pol	CCA	0	0	0	pol	GAT	0	0	0	pol	CAT	0	0	0	pol	TCT	0	0	0	pol	GAC	0	0	0	pol	GAC	0	0	0	pol	GAT	0	0	0	pol	TAT	0	0	0
pol	TTA	0	0	0	pol	ATA	0	0	0	pol	GAA	0	0	0	pol	GAT	0	0	0	pol	AGA	0	0	0	pol	GAC	0	0	0	pol	CTA	0	0	0	pol	TTA	0	0	0	pol	GAT	0	0	0	pol	CAA	0	0	0
pol	GAA	0	0	0	pol	GGG	0	0	0	pol	AAA	0	0	0	pol	TTG	0	0	0	pol	GCA	0	0	0	pol	TTA	0	0	0	pol	GAA	0	0	0	pol	GAA	0	0	0	pol	TTG	0	0	0	pol	TAC	0	0	0
pol	ATA	0	0	0	pol	CAG	0	0	0	pol	GAC	0	0	0	pol	TAT	0	0	0	pol	AAA	0	0	0	pol	GAG	0	0	0	pol	ATA	0	0	0	pol	ATA	0	0	0	pol	TAT	0	0	0	pol	ATG	0	0	0
pol	GGA	0	0	0	pol	CAT	0	0	0	pol	AGC	0	0	0	pol	GTA	0	0	0	pol	ATA	0	0	0	pol	ATA	0	0	0	pol	GAG	0	0	0	pol	GAG	0	0	0	pol	GTA	0	0	0	pol	GAT	0	0	0
pol	CAG	0	0	0	pol	AGA	0	0	0	pol	TGG	0	0	0	pol	GGA	0	0	0	pol	GAG	0	0	0	pol	GGA	0	0	0	pol	CAA	0	0	0	pol	CAG	0	0	0	pol	GGA	0	0	0	pol	GAT	0	0	0
pol	CAT	0	0	0	pol	ATA	0	0	0	pol	ACT	0	0	0	pol	TCT	0	0	0	pol	GAA	0	0	0	pol	CAG	0	0	0	pol	CAT	0	0	0	pol	CAC	0	0	0	pol	TCT	0	0	0	pol	TTG	0	0	0
pol	AGA	0	0	0	pol	AAA	0	0	0	pol	GTC	0	0	0	pol	GAC	0	0	0	pol	CTG	0	0	0	pol	CAT	0	0	0	pol	AGA	0	0	0	pol	AGA	0	0	0	pol	GAC	0	0	0	pol	TAT	0	0	0
pol	ACA	0	0	0	pol	ATA	0	0	0	pol	AAT	0	0	0	pol	TTA	0	0	0	pol	AGA	0	0	0	pol	AGA	0	0	0	pol	ACA	0	0	0	pol	ATA	0	0	0	pol	TTA	0	0	0	pol	GTA	0	0	0
pol	AAG	0	0	0	pol	GAG	0	0	0	pol	GAC	0	0	0	pol	GAA	0	0	0	pol	CAA	0	0	0	pol	GCA	0	0	0	pol	AAA	0	0	0	pol	AAA	0	0	0	pol	GAA	0	0	0	pol	GGA	0	0	0
pol	ATA	0	0	0	pol	GAC	0	0	0	pol	ATA	0	0	0	pol	ATA	0	0	0	pol	CAT	0	0	0	pol	AAA	0	0	0	pol	ATA	0	0	0	pol	ATA	0	0	0	pol	ATA	0	0	0	pol	TCT	0	0	0
pol	GAG	0	0	0	pol	TTG	0	0	0	pol	CAA	0	0	0	pol	GGG	0	0	0	pol	CTG	0	0	0	pol	ATA	0	0	0	pol	GAG	0	0	0	pol	GAG	0	0	0	pol	GGG	0	0	0	pol	GAC	0	0	0
pol	GAA	0	0	0	pol	AGA	0	0	0	pol	AAG	0	0	0	pol	CAG	0	0	0	pol	TTG	0	0	0	pol	GAG	0	0	0	pol	GAA	0	0	0	pol	GAA	0	0	0	pol	CAG	0	0	0	pol	TTA	0	0	0
pol	CTG	0	0	0	pol	CAA	0	0	0	pol	TTA	0	0	0	pol	CAT	0	0	0	pol	AGG	0	0	0	pol	GAA	0	0	0	pol	CTG	0	0	0	pol	CTG	0	0	0	pol	CAC	0	0	0	pol	GAA	0	0	0
pol	AGA	0	0	0	pol	CAT	0	0	0	pol	GTG	0	0	0	pol	AGA	0	0	0	pol	TGG	1	1	1	pol	CTG	0	0	0	pol	AGA	0	0	0	pol	AGA	0	0	0	pol	AGA	0	0	0	pol	ATA	0	0	0
pol	CAA	0	0	0	pol	CTG	0	0	0	pol	GGA	0	0	0	pol	TCA	0	0	0	pol	GGA	0	0	0	pol	AGA	0	0	0	pol	CAA	0	0	0	pol	CAA	0	0	0	pol	GCA	0	0	0	pol	GGG	0	0	0
pol	CAT	0	0	0	pol	TTA	0	0	0	pol	AAA	0	0	0	pol	AAA	0	0	0	pol	TTT	0	0	0	pol	GAA	0	0	0	pol	CAT	0	0	0	pol	CAT	0	0	0	pol	AAG	0	0	0	pol	CAA	0	0	0
pol	CTG	0	0	0	pol	AAG	0	0	0	pol	TTA	0	0	0	pol	ATA	0	0	0	pol	ACC	0	0	0	pol	CAT	0	0	0	pol	CTG	0	0	0	pol	CTG	0	0	0	pol	ATA	0	0	0	pol	CAT	0	0	0
pol	TTG	0	0	0	pol	TGG	0	1	0	pol	AAT	0	0	0	pol	GAG	0	0	0	pol	ACA	0	0	0	pol	CTA	0	0	0	pol	TTG	0	0	0	pol	TTG	0	0	0	pol	GAG	0	0	0	pol	AGG	0	0	0
pol	AGG	0	0	0	pol	GGG	0	0	0	pol	TGG	0	0	0	pol	GAA	0	0	0	pol	CCA	0	0	0	pol	TTA	0	0	0	pol	AGG	0	0	0	pol	AGT	0	0	0	pol	GAA	0	0	0	pol	GAA	0	0	0
pol	TGG	1	1	2	pol	TTT	0	0	0	pol	GCA	0	0	0	pol	CTA	0	0	0	pol	GAT	0	0	0	pol	AGG	0	0	0	pol	TGG	0	0	0	pol	TGG	1	0	1	pol	CTA	0	0	0	pol	AAA	0	0	0
pol	GGA	0	0	0	pol	ACC	0	0	0	pol	AGT	0	0	0	pol	AGA	0	0	0	pol	AAA	0	0	0	pol	TGG	0	0	0	pol	GGG	0	0	0	pol	GGA	0	0	0	pol	AGA	0	0	0	pol	ATA	0	0	0
pol	TTT	0	0	0	pol	ACA	0	0	0	pol	CAG	0	0	0	pol	CAA	0	0	0	pol	AAA	0	0	0	pol	GGA	0	0	0	pol	TTT	0	0	0	pol	TTT	0	0	0	pol	CAG	0	0	0	pol	GAG	0	0	0
pol	ACC	0	0	0	pol	CCA	0	0	0	pol	ATT	0	0	0	pol	CAT	0	0	0	pol	CAT	0	0	0	pol	TTT	0	0	0	pol	ACA	0	0	0	pol	ACC	0	0	0	pol	CAT	0	0	0	pol	GAA	0	0	0
pol	ACA	0	0	0	pol	GAC	0	0	0	pol	TAC	0	0	0	pol	CTG	0	0	0	pol	CAG	0	0	0	pol	ACC	0	0	0	pol	ACA	0	0	0	pol	ACA	0	0	0	pol	CTG	0	0	0	pol	CTA	0	0	0
pol	CCA	0	0	0	pol	AAA	0	0	0	pol	TCA	0	0	0	pol	TTG	0	0	0	pol	AAA	0	0	0	pol	ACA	0	0	0	pol	CCA	0	0	0	pol	CCA	0	0	0	pol	TTG	0	0	0	pol	AGA	0	0	0
pol	GAC	0	0	0	pol	AAA	0	0	0	pol	GGG	0	0	0	pol	AGG	0	0	0	pol	GAA	0	0	0	pol	CCA	0	0	0	pol	GAT	0	0	0	pol	GAC	0	0	0	pol	AAG	0	0	0	pol	CAA	0	0	0
pol	AAA	0	0	0	pol	CAC	0	0	0	pol	ATT	0	0	0	pol	TGG	0	0	0	pol	CCT	0	0	0	pol	GAC	0	0	0	pol	AAA	0	0	0	pol	AAA	0	0	0	pol	TGG	0	0	4	pol	CAT	0	0	0
pol	AAG	0	0	0	pol	CAG	0	0	0	pol	AAA	0	0	0	pol	GGA	0	0	0	pol	CCA	0	0	0	pol	AAA	0	0	0	pol	AAA	0	0	0	pol	AAA	0	0	0	pol	GGA	0	0	0	pol	CTG	0	0	0
pol	CAT	0	0	0	pol	AAA	0	0	0	pol	GTA	0	0	0	pol	TTT	0	0	0	pol	TTC	0	0	0	pol	AAA	0	0	0	pol	CAT	0	0	0	pol	CAT	0	0	0	pol	TTT	0	0	0	pol	TTG	0	0	0
pol	CAG	0	0	0	pol	GAA	0	0	0	pol	AGG	0	0	0	pol	ACC	0	0	0	pol	CTT	0	0	0	pol	CAT	0	0	0	pol	CAG	0	0	0	pol	CAG	0	1	0	pol	ACT	0	0	0	pol	AAG	0	0	0
pol	AAA	0	0	0	pol	CCT	0	0	0	pol	CAA	0	0	0	pol	ACA	0	0	0	pol	TGG	0	3	0	pol	CAG	0	0	0	pol	AAA	0	0	0	pol	AAA	0	0	0	pol	ACA	0	0	0	pol	TGG	2	0	2
pol	GAA	0	0	0	pol	CCA	0	0	0	pol	TTA	0	0	0	pol	CCA	0	0	0	pol	ATG	0	0	0	pol	AAA	0	0	0	pol	GAA	0	0	0	pol	GAA	0	0	0	pol	CCA	0	0	0	pol	GGA	0	0	0
pol	CCT	0	0	0	pol	TTT	0	0	0	pol	TGT	0	0	0	pol	GAC	0	0	0	pol	GGT	0	0	0	pol	GAA	0	0	0	pol	CCT	0	0	0	pol	CCA	0	0	0	pol	GAC	0	0	0	pol	TTT	0	0	0
pol	CCA	0	0	0	pol	CTT	0	0	0	pol	AAA	0	0	0	pol	AAA	0	0	0	pol	TAT	0	0	0	pol	CCT	0	0	0	pol	CCA	0	0	0	pol	CCT	0	0	0	pol	AAA	0	0	0	pol	ACC	0	0	0
pol	TTC	0	0	0	pol	TGG	0	1	2	pol	CTC	0	0	0	pol	AAG	0	0	0	pol	GAA	0	0	0	pol	CCA	0	0	0	pol	TTC	0	0	0	pol	TTC	0	0	0	pol	AAA	0	0	0	pol	ACA	0	0	0
pol	CTT	0	0	0	pol	ATG	0	0	0	pol	CTT	0	0	0	pol	CAT	0	0	0	pol	CTC	0	0	0	pol	TTC	0	0	0	pol	CTT	0	0	0	pol	CTC	0	0	0	pol	CAT	0	0	0	pol	CCA	0	0	0
pol	TGG	0	3	1	pol	GGT	0	0	0	pol	AGG	0	0	0	pol	CAG	0	0	0	pol	CAT	0	0	0	pol	CTT	0	0	0	pol	TGG	0	2	0	pol	TGG	0	0	0	pol	CAG	0	0	0	pol	GAC	0	0	0
pol	ATG	0	0	0	pol	TAT	0	0	0	pol	GGA	0	0	0	pol	AAA	0	0	0	pol	CCT	0	0	0	pol	TGG	0	0	0	pol	ATG	0	0	0	pol	ATG	0	0	0	pol	AAA	0	0	0	pol	AAA	0	0	0
pol	GGT	0	0	0	pol	GAA	0	0	0	pol	GCC	0	0	0	pol	GAG	0	0	0	pol	GAT	0	0	0	pol	ATG	0	0	0	pol	GGT	0	0	0	pol	GGT	0	0	0	pol	GAA	0	0	0	pol	AAA	0	0	0
pol	TAT	0	0	0	pol	CTC	0	0	0	pol	AAA	0	0	0	pol	CCC	0	0	0	pol	AAA	0	0	0	pol	GGT	0	0	0	pol	TAT	0	0	0	pol	TAT	0	0	0	pol	CCT	0	0	0	pol	CAT	0	0	0
pol	GAA	0	0	0	pol	CAT	0	0	0	pol	GCA	0	0	0	pol	CCA	0	0	0	pol	TGG	0	0	0	pol	TAT	0	0	0	pol	GAA	0	0	0	pol	GAA	0	0	0	pol	CCA	0	0	0	pol	CAG	0	0	0
pol	CTC	0	0	0	pol	CCT	0	0	0	pol	CTA	0	0	0	pol	TTC	0	0	0	pol	ACA	0	0	0	pol	GAA	0	0	0	pol	CTC	0	0	0	pol	CTT	0	0	0	pol	TTT	0	0	0	pol	AAA	0	0	0
pol	CAT	0	0	0	pol	GAT	0	0	0	pol	ACA	0	0	0	pol	CTT	0	0	0	pol	GTA	0	0	0	pol	CTC	0	0	0	pol	CAT	0	0	0	pol	CAT	0	0	0	pol	CTT	0	0	0	pol	GAA	0	0	0
pol	CCT	0	0	0	pol	AAA	0	0	0	pol	GAA	0	0	0	pol	TGG	0	0	0	pol	CAG	0	0	0	pol	CAT	0	0	0	pol	CCT	0	0	0	pol	CCC	0	0	0	pol	TGG	0	3	0	pol	CCT	0	0	0
pol	GAT	0	0	0	pol	TGG	0	1	0	pol	GTA	0	0	0	pol	ATG	0	0	0	pol	CCT	0	0	0	pol	CCT	0	0	0	pol	GAT	0	0	0	pol	GAT	0	0	0	pol	ATG	0	0	0	pol	CCA	0	0	0
pol	AAA	0	0	0	pol	ACA	0	0	0	pol	GTA	0	0	0	pol	GGT	0	0	0	pol	ATA	0	0	0	pol	GAT	0	0	0	pol	AAA	0	0	0	pol	AAA	0	0	0	pol	GGT	0	0	0	pol	TTC	0	0	0
pol	TGG	0	0	0	pol	GTA	0	0	0	pol	CCA	0	0	0	pol	TAT	0	0	0	pol	GAG	0	0	0	pol	AAA	0	0	0	pol	TGG	0	1	0	pol	TGG	0	0	0	pol	TAT	0	0	0	pol	CTT	0	0	0
pol	ACA	0	0	0	pol	CAG	0	0	0	pol	CTA	0	0	0	pol	GAA	0	0	0	pol	CTG	0	0	0	pol	TGG	0	0	0	pol	ACA	0	0	0	pol	ACA	0	0	0	pol	GAA	0	0	0	pol	TGG	0	3	0
pol	GTA	0	0	0	pol	CCT	0	0	0	pol	ACA	0	0	0	pol	CTC	0	0	0	pol	CCA	0	0	0	pol	ACA	0	0	0	pol	GTA	0	0	0	pol	GTA	0	0	0	pol	CTA	0	0	0	pol	ATG	0	0	0
pol	CAG	0	0	0	pol	ATA	0	0	0	pol	CAA	0	0	0	pol	CAT	0	0	0	pol	GAA	0	0	0	pol	GTA	0	0	0	pol	CAG	0	0	0	pol	CAG	0	0	0	pol	CAT	0	0	0	pol	GGG	0	0	0
pol	CCT	0	0	0	pol	ATT	0	0	0	pol	GAA	0	0	0	pol	CCT	0	0	0	pol	AGA	0	0	0	pol	CAG	0	0	0	pol	CCT	0	0	0	pol	CCT	0	0	0	pol	CCT	0	0	0	pol	TAT	0	0	0
pol	ATA	0	0	0	pol	CTG	0	0	0	pol	GCA	0	0	0	pol	GAT	0	0	0	pol	GAC	0	0	0	pol	CCT	0	0	0	pol	ATA	0	0	0	pol	ATA	0	0	0	pol	GAT	0	0	0	pol	GAA	0	0	0
pol	GAG	0	0	0	pol	CCA	0	0	0	pol	GAG	0	0	0	pol	AAA	0	0	0	pol	AGC	0	0	0	pol	ATA	0	0	0	pol	AAG	0	0	0	pol	ATG	0	0	0	pol	AAA	0	0	0	pol	CTT	0	0	0
pol	CTG	0	0	0	pol	GAA	0	0	0	pol	CTA	0	0	0	pol	TGG	0	0	0	pol	TGG	0	0	0	pol	GAG	0	0	0	pol	CTG	0	0	0	pol	TTG	0	0	0	pol	TGG	0	1	0	pol	CAT	0	0	0
pol	CCA	0	0	0	pol	AAG	0	0	0	pol	GAA	0	0	0	pol	ACG	0	0	0	pol	ACT	0	0	0	pol	CTG	0	0	0	pol	CCA	0	0	0	pol	CCA	0	0	0	pol	ACA	0	0	0	pol	CCT	0	0	0
pol	GAA	0	0	0	pol	GAA	0	0	0	pol	CTG	0	0	0	pol	GTA	0	0	0	pol	GTC	0	0	0	pol	CCA	0	0	0	pol	GAA	0	0	0	pol	GAA	0	0	0	pol	GTA	0	0	0	pol	GAT	0	0	0
pol	AAA	0	0	0	pol	AGC	0	0	0	pol	GCA	0	0	0	pol	CAG	0	0	0	pol	AAT	0	0	0	pol	GAA	0	0	0	pol	AAG	0	0	0	pol	AAA	0	0	0	pol	CAG	0	0	0	pol	AAA	0	0	0
pol	GAC	0	0	0	pol	TGG	0	2	0	pol	GAA	0	0	0	pol	CCT	0	0	0	pol	GAC	0	0	0	pol	AAA	0	0	0	pol	GAC	0	0	0	pol	GAC	0	0	0	pol	CCT	0	0	0	pol	TGG	0	1	0
pol	AGC	0	0	0	pol	ACT	0	0	0	pol	AAC	0	0	0	pol	ATT	0	0	0	pol	ATA	0	0	0	pol	GAT	0	0	0	pol	AGC	0	0	0	pol	AGC	0	0	0	pol	ATA	0	0	0	pol	ACA	0	0	0
pol	TGG	0	1	1	pol	GTC	0	0	0	pol	AGG	0	0	0	pol	AAG	0	0	0	pol	CAG	0	0	0	pol	AGC	0	0	0	pol	TGG	0	0	0	pol	TGG	0	2	0	pol	AAG	0	0	0	pol	GTA	0	0	0
pol	ACT	0	0	0	pol	AAT	0	0	0	pol	GAG	0	0	0	pol	CTG	0	0	0	pol	AAG	0	0	0	pol	TGG	0	0	0	pol	ACT	0	0	0	pol	ACT	0	0	0	pol	CTG	0	0	0	pol	CAG	0	0	0
pol	GTC	0	0	0	pol	GAC	0	0	0	pol	ATT	0	0	0	pol	CCA	0	0	0	pol	TTA	0	0	0	pol	ACT	0	0	0	pol	GTC	0	0	0	pol	GTC	0	0	0	pol	CCA	0	0	0	pol	CCT	0	0	0
pol	AAT	0	0	0	pol	ATA	0	0	0	pol	CTA	0	0	0	pol	GAA	0	0	0	pol	GTG	0	0	0	pol	GTC	0	0	0	pol	AAT	0	0	0	pol	AAT	0	0	0	pol	GAA	0	0	0	pol	ATA	0	0	0
pol	GAC	0	0	0	pol	CAG	0	0	0	pol	AAA	0	0	0	pol	AAA	0	0	0	pol	GGA	0	0	0	pol	AAT	0	0	0	pol	GAC	0	0	0	pol	GAC	0	0	0	pol	AAA	0	0	0	pol	ATG	0	0	0
pol	ATA	0	0	0	pol	AAG	0	0	0	pol	GAA	0	0	0	pol	GAA	0	0	0	pol	AAA	0	0	0	pol	GAC	0	0	0	pol	ATA	0	0	0	pol	ATA	0	0	0	pol	GAC	0	0	0	pol	CTG	0	0	0
pol	CAG	0	0	0	pol	TTA	0	0	0	pol	CCA	0	0	0	pol	AGC	0	0	0	pol	TTA	0	0	0	pol	ATA	0	0	0	pol	CAA	0	0	0	pol	CAG	0	0	0	pol	AGT	0	0	0	pol	CCA	0	0	0
pol	AAG	0	0	0	pol	GTA	0	0	0	pol	GTA	0	0	0	pol	TGG	0	0	0	pol	AAT	0	0	0	pol	CAA	0	0	0	pol	AAA	0	0	0	pol	AAG	0	0	0	pol	TGG	0	3	0	pol	GAA	0	0	0
pol	TTA	0	0	0	pol	GGA	0	0	0	pol	CAT	0	0	0	pol	ACT	0	0	0	pol	TGG	0	1	0	pol	AAG	0	0	0	pol	TTA	0	0	0	pol	TTA	0	0	0	pol	ACT	0	0	0	pol	AAA	0	0	0
pol	GTG	0	0	0	pol	AAA	0	0	0	pol	GGA	0	0	0	pol	GTC	0	0	0	pol	GCA	0	0	0	pol	TTA	0	0	0	pol	GTG	0	0	0	pol	GTG	0	0	0	pol	GTC	0	0	0	pol	GAC	0	0	0
pol	GGA	0	0	0	pol	TTG	0	0	0	pol	GTG	0	0	0	pol	AAT	0	0	0	pol	AGT	0	0	0	pol	GTG	0	0	0	pol	GGA	0	0	0	pol	GGA	0	0	0	pol	AAT	0	0	0	pol	AGC	0	0	0
pol	AAA	0	0	0	pol	AAT	0	0	0	pol	TAC	0	0	0	pol	GAC	0	0	0	pol	CAG	0	0	0	pol	GGA	0	0	0	pol	AAA	0	0	0	pol	AAA	0	0	0	pol	GAC	0	0	0	pol	TGG	0	2	0
pol	TTA	0	0	0	pol	TGG	0	1	0	pol	TAT	0	0	0	pol	ATA	0	0	0	pol	ATT	0	0	0	pol	AAA	0	0	0	pol	TTA	0	0	0	pol	TTG	0	0	0	pol	ATA	0	0	0	pol	ACT	0	0	0
pol	AAT	0	0	0	pol	GCA	0	0	0	pol	GAC	0	0	0	pol	CAG	0	0	0	pol	TAC	0	0	0	pol	TTA	0	0	0	pol	AAC	0	0	0	pol	AAT	0	0	0	pol	CAG	0	0	0	pol	GTC	0	0	0
pol	TGG	0	4	0	pol	AGT	0	0	0	pol	CCA	0	0	0	pol	AAG	0	0	0	pol	CCA	0	0	0	pol	AAT	0	0	0	pol	TGG	0	1	0	pol	TGG	0	2	0	pol	AAG	0	0	0	pol	AAT	0	0	0
pol	GCA	0	0	0	pol	CAG	0	0	0	pol	TCA	0	0	0	pol	TTA	0	0	0	pol	GGG	0	0	0	pol	TGG	0	0	0	pol	GCA	0	0	0	pol	GCA	0	0	0	pol	TTA	0	0	0	pol	GAC	0	0	0
pol	AGT	0	0	0	pol	ATT	0	0	0	pol	AAA	0	0	0	pol	GTG	0	0	0	pol	ATT	0	0	0	pol	GCA	0	0	0	pol	AGT	0	0	0	pol	AGT	0	0	0	pol	GTG	0	0	0	pol	ATA	0	0	0
pol	CAG	0	0	0	pol	TAT	0	0	0	pol	GAC	0	0	0	pol	GGA	0	0	0	pol	AAA	0	0	0	pol	AGT	0	0	0	pol	CAG	0	0	0	pol	CAG	0	0	0	pol	GGA	0	0	0	pol	CAA	0	0	0
pol	ATT	0	0	0	pol	GCA	0	0	0	pol	TTA	0	0	0	pol	AAA	0	0	0	pol	GTA	0	0	0	pol	CAG	0	0	0	pol	ATT	0	0	0	pol	ATT	0	0	0	pol	AAA	0	0	0	pol	AAG	0	0	0
pol	TAT	0	0	0	pol	GGG	0	0	0	pol	GTA	0	0	0	pol	TTA	0	0	0	pol	AAG	0	0	0	pol	ATT	0	0	0	pol	TAT	0	0	0	pol	TAT	0	0	0	pol	TTG	0	0	0	pol	TTA	0	0	0
pol	GCA	0	0	0	pol	ATT	0	0	0	pol	GCA	0	0	0	pol	AAT	0	0	0	pol	CAA	0	0	0	pol	TAT	0	0	0	pol	CCA	0	0	0	pol	CCA	0	0	0	pol	AAT	0	0	0	pol	GTG	0	0	0
pol	GGG	0	0	0	pol	AAA	0	0	0	pol	GAA	0	0	0	pol	TGG	0	0	0	pol	TTA	0	0	0	pol	CCA	0	0	0	pol	GGG	0	0	0	pol	GGA	0	0	0	pol	TGG	0	3	0	pol	GGA	0	0	0
pol	ATT	0	0	0	pol	GTA	0	0	0	pol	ATA	0	0	0	pol	GCA	0	0	0	pol	TGT	0	0	0	pol	GGG	0	0	0	pol	ATT	0	0	0	pol	ATT	0	0	0	pol	GCA	0	0	0	pol	AAA	0	0	0
pol	AAG	0	0	0	pol	AAA	0	0	0	pol	CAG	0	0	0	pol	AGT	0	0	0	pol	AGA	0	0	0	pol	ATT	0	0	0	pol	AAA	0	0	0	pol	AAA	0	0	0	pol	AGT	0	0	0	pol	TTA	0	0	0
pol	GTA	0	0	0	pol	CAA	0	0	0	pol	AAG	0	0	0	pol	CAG	0	0	0	pol	CTC	0	0	0	pol	AAA	0	0	0	pol	GTA	0	0	0	pol	GTA	0	0	0	pol	CAG	0	0	0	pol	AAT	0	0	0
pol	AGG	0	0	0	pol	TTA	0	0	0	pol	CAA	0	0	0	pol	ATT	0	0	0	pol	CTT	0	0	0	pol	GTA	0	0	0	pol	AGG	0	0	0	pol	AAG	0	0	0	pol	ATT	0	0	0	pol	TGG	0	3	0
pol	CAA	0	0	0	pol	TGT	0	0	0	pol	GGG	0	0	0	pol	TAT	0	0	0	pol	AGG	0	0	0	pol	AGG	0	0	0	pol	CAA	0	0	0	pol	CAA	0	0	0	pol	TAT	0	0	0	pol	GCA	0	0	0
pol	TTA	0	0	0	pol	AAA	0	0	0	pol	CAT	0	0	0	pol	GCA	0	0	0	pol	GGA	0	0	0	pol	CAA	0	0	0	pol	TTA	0	0	0	pol	TTA	0	0	0	pol	CCA	0	0	0	pol	AGT	0	0	0
pol	TGT	0	0	0	pol	CTC	0	0	0	pol	GGC	0	0	0	pol	GGG	0	0	0	pol	GCC	0	0	0	pol	TTA	0	0	0	pol	TGT	0	0	0	pol	TGT	0	0	0	pol	GGG	0	0	0	pol	CAG	0	0	0
pol	AAA	0	0	0	pol	CTT	0	0	0	pol	CAA	0	0	0	pol	ATT	0	0	0	pol	AAA	0	0	0	pol	TGT	0	0	0	pol	AAA	0	0	0	pol	AGA	0	0	0	pol	ATC	0	0	0	pol	ATT	0	0	0
pol	CTC	0	0	0	pol	AGG	0	0	0	pol	TGG	0	0	0	pol	AAA	0	0	0	pol	GCA	0	0	0	pol	AAA	0	0	0	pol	CTC	0	0	0	pol	CTC	0	0	0	pol	AAA	0	0	0	pol	TAC	0	0	0
pol	CTT	0	0	0	pol	GGA	0	0	0	pol	ACA	0	0	0	pol	ACA	0	0	0	pol	TTA	0	0	0	pol	CTC	0	0	0	pol	CTT	0	0	0	pol	CTT	0	0	0	pol	GTA	0	0	0	pol	CCA	0	0	0
pol	AGG	0	0	0	pol	ACC	0	0	0	pol	TAT	0	0	0	pol	AGG	0	0	0	pol	ACA	0	0	0	pol	CTT	0	0	0	pol	AGG	0	0	0	pol	AGG	0	0	0	pol	AGG	0	0	0	pol	GGG	0	0	0
pol	GGA	0	0	0	pol	AAA	0	0	0	pol	CAA	0	0	0	pol	CAG	0	0	0	pol	GAA	0	0	0	pol	AGG	0	0	0	pol	GGA	0	0	0	pol	GGA	0	0	0	pol	CAA	0	0	0	pol	ATT	0	0	0
pol	ACC	0	0	0	pol	GCA	0	0	0	pol	ATT	0	0	0	pol	TTA	0	0	0	pol	GTA	0	0	0	pol	GGA	0	0	0	pol	ACC	0	0	0	pol	GCC	0	0	0	pol	TTA	0	0	0	pol	AAA	0	0	0
pol	AAA	0	0	0	pol	CTA	0	0	0	pol	TAT	0	0	0	pol	TGT	0	0	0	pol	ATA	0	0	0	pol	GCC	0	0	0	pol	AAA	0	0	0	pol	AAA	0	0	0	pol	TGT	0	0	0	pol	GTA	0	0	0
pol	GCA	0	0	0	pol	ACA	0	0	0	pol	CAA	0	0	0	pol	AAA	0	0	0	pol	CCA	0	0	0	pol	AAA	0	0	0	pol	GCA	0	0	0	pol	GCA	0	0	0	pol	AAA	0	0	0	pol	AGG	0	0	0
pol	CTA	0	0	0	pol	GAA	0	0	0	pol	GAA	0	0	0	pol	CTC	0	0	0	pol	CTA	0	0	0	pol	GCA	0	0	0	pol	CTA	0	0	0	pol	CTA	0	0	0	pol	CTT	0	0	0	pol	CAA	0	0	0
pol	ACA	0	0	0	pol	GTA	0	0	0	pol	CCA	0	0	0	pol	CTT	0	0	0	pol	ACA	0	0	0	pol	CTA	0	0	0	pol	ACA	0	0	0	pol	ACA	0	0	0	pol	CTT	0	0	0	pol	TTA	0	0	0
pol	GAG	0	0	0	pol	ATA	0	0	0	pol	TTT	0	0	0	pol	AGG	0	0	0	pol	GAA	0	0	0	pol	ACA	0	0	0	pol	GAA	0	0	0	pol	GAA	0	0	0	pol	AGG	0	0	0	pol	TGT	0	0	0
pol	GTA	0	0	0	pol	CCA	0	0	0	pol	AAA	0	0	0	pol	GGA	0	0	0	pol	GAA	0	0	0	pol	GAA	0	0	0	pol	GTA	0	0	0	pol	GTA	0	0	0	pol	GGA	0	0	0	pol	AAA	0	0	0
pol	GTA	0	0	0	pol	CTA	0	0	0	pol	AAT	0	0	0	pol	ACC	0	0	0	pol	GCA	0	0	0	pol	GTA	0	0	0	pol	GTA	0	0	0	pol	GTA	0	0	0	pol	GCC	0	0	0	pol	CTC	0	0	0
pol	CCA	0	0	0	pol	ACA	0	0	0	pol	CTG	0	0	0	pol	AAA	0	0	0	pol	GAG	0	0	0	pol	GTA	0	0	0	pol	TCG	0	0	0	pol	CCA	0	0	0	pol	AAA	0	0	0	pol	CTT	0	0	0
pol	CTA	0	0	0	pol	GAA	0	0	0	pol	AAA	0	0	0	pol	GCA	0	0	0	pol	CTA	0	0	0	pol	CCA	0	0	0	pol	CTA	0	0	0	pol	CTA	0	0	0	pol	GCA	0	0	0	pol	AGG	0	0	0
pol	ACG	0	0	0	pol	GAA	0	0	0	pol	ACA	0	0	0	pol	CTA	0	0	0	pol	GAA	0	0	0	pol	CTA	0	0	0	pol	ACA	0	0	0	pol	ACA	0	0	0	pol	CTA	0	0	0	pol	GGA	0	0	0
pol	GCA	0	0	0	pol	GCA	0	0	0	pol	GGA	0	0	0	pol	ACA	0	0	0	pol	CTG	0	0	0	pol	ACA	0	0	0	pol	AGA	0	0	0	pol	GCA	0	0	0	pol	ACA	0	0	0	pol	ACT	0	0	0
pol	GAA	0	0	0	pol	GAA	0	0	0	pol	AAG	0	0	0	pol	GAA	0	0	0	pol	GCA	0	0	0	pol	GAA	0	0	0	pol	GAA	0	0	0	pol	GAA	0	0	0	pol	GAA	0	0	0	pol	AAG	0	0	0
pol	GCA	0	0	0	pol	TTA	0	0	0	pol	TAT	0	0	0	pol	GTA	0	0	0	pol	GAA	0	0	0	pol	GAA	0	0	0	pol	GCA	0	0	0	pol	GCA	0	0	0	pol	GTA	0	0	0	pol	GCA	0	0	0
pol	GAG	0	0	0	pol	GAA	0	0	0	pol	GCA	0	0	0	pol	ATA	0	0	0	pol	AAC	0	0	0	pol	GCA	0	0	0	pol	GAA	0	0	0	pol	GAG	0	0	0	pol	ATA	0	0	0	pol	CTA	0	0	0
pol	CTA	0	0	0	pol	CTG	0	0	0	pol	AGA	0	0	0	pol	CCA	0	0	0	pol	AGA	0	0	0	pol	GAA	0	0	0	pol	CTA	0	0	0	pol	CTA	0	0	0	pol	CCA	0	0	0	pol	ACA	0	0	0
pol	GAA	0	0	0	pol	GCA	0	0	0	pol	ATG	0	0	0	pol	CTA	0	0	0	pol	GAG	0	0	0	pol	CTA	0	0	0	pol	GAA	0	0	0	pol	GAA	0	0	0	pol	CTA	0	0	0	pol	GAA	0	0	0
pol	CTG	0	0	0	pol	GAA	0	0	0	pol	AGG	0	0	0	pol	ACA	0	0	0	pol	ATT	0	0	0	pol	GAA	0	0	0	pol	TTG	0	0	0	pol	CTG	0	0	0	pol	ACA	0	0	0	pol	ATC	0	0	0
pol	GCA	0	0	0	pol	AAC	0	0	0	pol	GGT	0	0	0	pol	GAA	0	0	0	pol	CTA	0	0	0	pol	CTG	0	0	0	pol	GCA	0	0	0	pol	GCA	0	0	0	pol	GCA	0	0	0	pol	ATA	0	0	0
pol	GAA	0	0	0	pol	AGG	0	0	0	pol	GCC	0	0	0	pol	GAA	0	0	0	pol	AAA	0	0	0	pol	GCA	0	0	0	pol	GAA	0	0	0	pol	GAA	0	0	0	pol	GAA	0	0	0	pol	ACA	0	0	0
pol	AAC	0	0	0	pol	GAG	0	0	0	pol	CAC	0	0	0	pol	GCA	0	0	0	pol	GAA	0	0	0	pol	GAA	0	0	0	pol	AAC	0	0	0	pol	AAC	0	0	0	pol	GCA	0	0	0	pol	CTA	0	0	0
pol	AGG	0	0	0	pol	ATT	0	0	0	pol	ACT	0	0	0	pol	GAG	0	0	0	pol	CCA	0	0	0	pol	AAC	0	0	0	pol	AGG	0	0	0	pol	AGG	0	0	0	pol	GAG	0	0	0	pol	ACA	0	0	0
pol	GAA	0	0	0	pol	CTA	0	0	0	pol	AAT	0	0	0	pol	CTA	0	0	0	pol	GTA	0	0	0	pol	AGG	0	0	0	pol	GAG	0	0	0	pol	GAG	0	0	0	pol	CTA	0	0	0	pol	AGA	0	0	0
pol	ATC	0	0	0	pol	AAA	0	0	0	pol	GAT	0	0	0	pol	GAA	0	0	0	pol	CAT	0	0	0	pol	GAA	0	0	0	pol	ATT	0	0	0	pol	ATT	0	0	0	pol	GAA	0	0	0	pol	GAA	0	0	0
pol	CTA	0	0	0	pol	GAA	0	0	0	pol	GTA	0	0	0	pol	CTA	0	0	0	pol	GGA	0	0	0	pol	ATT	0	0	0	pol	CTC	0	0	0	pol	CTA	0	0	0	pol	CTG	0	0	0	pol	GCA	0	0	0
pol	AAA	0	0	0	pol	CCA	0	0	0	pol	AGA	0	0	0	pol	GCA	0	0	0	pol	GTG	0	0	0	pol	TTA	0	0	0	pol	AAA	0	0	0	pol	AGA	0	0	0	pol	GCA	0	0	0	pol	GAG	0	0	0
pol	GAA	0	0	0	pol	GTC	0	0	0	pol	CAG	0	0	0	pol	GAA	0	0	0	pol	TAT	0	0	0	pol	AAA	0	0	0	pol	GAA	0	0	0	pol	GAA	0	0	0	pol	GAA	0	0	0	pol	CTA	0	0	0
pol	CCA	0	0	0	pol	CAT	0	0	0	pol	TTA	0	0	0	pol	AAC	0	0	0	pol	TAT	0	0	0	pol	GAA	0	0	0	pol	CCA	0	0	0	pol	CCA	0	0	0	pol	AAC	0	0	0	pol	GAA	0	0	0
pol	GTA	0	0	0	pol	GGA	0	0	0	pol	GTA	0	0	0	pol	AGG	0	0	0	pol	GAC	0	0	0	pol	CCA	0	0	0	pol	GTA	0	0	0	pol	GTA	0	0	0	pol	AGG	0	0	0	pol	TTG	0	0	0
pol	CAT	0	0	0	pol	GTG	0	0	0	pol	GAA	0	0	0	pol	GAA	0	0	0	pol	CCA	0	0	0	pol	GTA	0	0	0	pol	CAT	0	0	0	pol	CAT	0	0	0	pol	GAA	0	0	0	pol	GCA	0	0	0
pol	GGA	0	0	0	pol	TAT	0	0	0	pol	GCA	0	0	0	pol	ATT	0	0	0	pol	TCA	0	0	0	pol	CAT	0	0	0	pol	GGA	0	0	0	pol	GGA	0	0	0	pol	ATT	0	0	0	pol	GAA	0	0	0
pol	GTG	0	0	0	pol	TAT	0	0	0	pol	GTG	0	0	0	pol	TTA	0	0	0	pol	AAA	0	0	0	pol	GGA	0	0	0	pol	GTG	0	0	0	pol	GTG	0	0	0	pol	CTA	0	0	0	pol	AAC	0	0	0
pol	TAT	0	0	0	pol	GAC	0	0	0	pol	CAC	0	0	0	pol	AAA	0	0	0	pol	GAT	0	0	0	pol	GTG	0	0	0	pol	TAC	0	0	0	pol	TAC	0	0	0	pol	AGA	0	0	0	pol	AGG	0	0	0
pol	TAT	0	0	0	pol	CCA	0	0	0	pol	AAA	0	0	0	pol	GAA	0	0	0	pol	TTA	0	0	0	pol	TAT	0	0	0	pol	TAT	0	0	0	pol	TAT	0	0	0	pol	GAA	0	0	0	pol	GAA	0	0	0
pol	GAC	0	0	0	pol	TCA	0	0	0	pol	ATA	0	0	0	pol	CCA	0	0	0	pol	ATA	0	0	0	pol	TAT	0	0	0	pol	GAC	0	0	0	pol	GAC	0	0	0	pol	CCA	0	0	0	pol	ATT	0	0	0
pol	CCA	0	0	0	pol	AAA	0	0	0	pol	GCT	0	0	0	pol	GTA	0	0	0	pol	GCA	0	0	0	pol	GAC	0	0	0	pol	CCA	0	0	0	pol	CCA	0	0	0	pol	GTA	0	0	0	pol	CTA	0	0	0
pol	TCA	0	0	0	pol	GAC	0	0	0	pol	ACA	0	0	0	pol	CAT	0	0	0	pol	GAA	0	0	0	pol	CCA	0	0	0	pol	TCA	0	0	0	pol	TCA	0	0	0	pol	CAT	0	0	0	pol	AAA	0	0	0
pol	AAA	0	0	0	pol	TTA	0	0	0	pol	GAA	0	0	0	pol	GGA	0	0	0	pol	ATA	0	0	0	pol	TCA	0	0	0	pol	AAA	0	0	0	pol	AAA	0	0	0	pol	GGA	0	0	0	pol	GAA	0	0	0
pol	GAC	0	0	0	pol	GTA	0	0	0	pol	AGC	0	0	0	pol	GTG	0	0	0	pol	CAG	0	0	0	pol	AAA	0	0	0	pol	GAC	0	0	0	pol	GAC	0	0	0	pol	GTA	0	0	0	pol	CCA	0	0	0
pol	TTA	0	0	0	pol	GCA	0	0	0	pol	ATA	0	0	0	pol	TAT	0	0	0	pol	AAG	0	0	0	pol	GAC	0	0	0	pol	TTA	0	0	0	pol	TTA	0	0	0	pol	TAC	0	0	0	pol	GTA	0	0	0
pol	ATA	0	0	0	pol	GAA	0	0	0	pol	GTA	0	0	0	pol	TAT	0	0	0	pol	CAG	0	0	0	pol	TTA	0	0	0	pol	ATA	0	0	0	pol	ATA	0	0	0	pol	TAT	0	0	0	pol	CAT	0	0	0
pol	GCA	0	0	0	pol	CTA	0	0	0	pol	ATA	0	0	0	pol	GAC	0	0	0	pol	GGG	0	0	0	pol	ATA	0	0	0	pol	GCA	0	0	0	pol	GCA	0	0	0	pol	GAT	0	0	0	pol	GGG	0	0	0
pol	GAA	0	0	0	pol	CAG	0	0	0	pol	TGG	0	0	0	pol	CCA	0	0	0	pol	AAC	0	0	0	pol	GCA	0	0	0	pol	GAA	0	0	0	pol	GAA	0	0	0	pol	CCA	0	0	0	pol	GTG	0	0	0
pol	ATA	0	0	0	pol	AAG	0	0	0	pol	GGA	0	0	0	pol	TCA	0	0	0	pol	AGT	0	0	0	pol	GAA	0	0	0	pol	ATA	0	0	0	pol	ATA	0	0	0	pol	TCA	0	0	0	pol	TAT	0	0	0
pol	CAG	0	0	0	pol	CAG	0	0	0	pol	AAG	0	0	0	pol	AAA	0	0	0	pol	CAA	0	0	0	pol	CTA	0	0	0	pol	CAG	0	0	0	pol	CAG	0	0	0	pol	AAA	0	0	0	pol	TAT	0	0	0
pol	AAG	0	0	0	pol	GGG	0	0	0	pol	ACT	0	0	0	pol	GAC	0	0	0	pol	TGG	0	0	0	pol	CAG	0	0	0	pol	AAG	0	0	0	pol	AAG	0	0	0	pol	GAT	0	0	0	pol	GAC	0	0	0
pol	CAG	0	0	0	pol	CAC	0	0	0	pol	CCT	0	0	0	pol	TTA	0	0	0	pol	ACA	0	0	0	pol	AAG	0	0	0	pol	CAG	0	0	0	pol	CAG	0	0	0	pol	TTA	0	0	0	pol	CCA	0	0	0
pol	GGG	0	0	0	pol	GGT	0	0	0	pol	AAA	0	0	0	pol	ATA	0	0	0	pol	TAT	0	0	0	pol	CAG	0	0	0	pol	GGG	0	0	0	pol	GGG	0	0	0	pol	GTA	0	0	0	pol	TCA	0	0	0
pol	CAA	0	0	0	pol	CAA	0	0	0	pol	TTT	0	0	0	pol	GCA	0	0	0	pol	CAA	0	0	0	pol	GGG	0	0	0	pol	CAA	0	0	0	pol	CAA	0	0	0	pol	GCA	0	0	0	pol	AAA	0	0	0
pol	GGC	0	0	0	pol	TGG	0	1	0	pol	AGA	0	0	0	pol	GAA	0	0	0	pol	ATT	0	0	0	pol	CAA	0	0	0	pol	GGC	0	0	0	pol	GGC	0	0	0	pol	GAA	0	0	0	pol	GAT	0	0	0
pol	CAA	0	0	0	pol	ACT	0	0	0	pol	CTA	0	0	0	pol	CTA	0	0	0	pol	TAT	0	0	0	pol	GAC	0	0	0	pol	CAA	0	0	0	pol	CAA	0	0	0	pol	ATA	0	0	0	pol	TTA	0	0	0
pol	TGG	0	1	0	pol	TAT	0	0	0	pol	CCC	0	0	0	pol	CAG	0	0	0	pol	CAA	0	0	0	pol	CAA	0	0	0	pol	TGG	0	0	0	pol	TGG	0	1	0	pol	CAG	0	0	0	pol	ATA	0	0	0
pol	ACA	0	0	0	pol	CAA	0	0	0	pol	ATA	0	0	0	pol	AAG	0	0	0	pol	GAG	0	0	0	pol	TGG	0	0	0	pol	ACA	0	0	0	pol	ACA	0	0	0	pol	AAG	0	0	0	pol	GCA	0	0	0
pol	TAT	0	0	0	pol	ATT	0	0	0	pol	CAA	0	0	0	pol	CAG	0	0	0	pol	CCA	0	0	0	pol	ACA	0	0	0	pol	TAT	0	0	0	pol	TAT	0	0	0	pol	CAG	0	0	0	pol	GAA	0	0	0
pol	CAA	0	0	0	pol	TAT	0	0	0	pol	AAA	0	0	0	pol	GGG	0	0	0	pol	TTT	0	0	0	pol	TAT	0	0	0	pol	CAA	0	0	0	pol	CAA	0	0	0	pol	GGG	0	0	0	pol	CTA	0	0	0
pol	ATT	0	0	0	pol	CAA	0	0	0	pol	GAA	0	0	0	pol	CAA	0	0	0	pol	AAA	0	0	0	pol	CAA	0	0	0	pol	ATT	0	0	0	pol	ATT	0	0	0	pol	CAG	0	0	0	pol	CAG	0	0	0
pol	TAT	0	0	0	pol	GAG	0	0	0	pol	ACA	0	0	0	pol	GGC	0	0	0	pol	AAC	0	0	0	pol	ATT	0	0	0	pol	TAT	0	0	0	pol	TAC	0	0	0	pol	GGC	0	0	0	pol	AAG	0	0	0
pol	CAA	0	0	0	pol	CCA	0	0	0	pol	TGG	0	0	0	pol	CAA	0	0	0	pol	CTG	0	0	0	pol	TAT	0	0	0	pol	CAA	0	0	0	pol	CAA	0	0	0	pol	CAA	0	0	0	pol	CAG	0	0	0
pol	GAG	0	0	0	pol	TTT	0	0	0	pol	GAA	0	0	0	pol	TGG	0	0	0	pol	AAA	0	0	0	pol	CAG	0	0	0	pol	GAG	0	0	0	pol	GAG	0	0	0	pol	TGG	0	1	0	pol	GAG	0	0	0
pol	CCA	0	0	0	pol	AAA	0	0	0	pol	ACA	0	0	0	pol	ACA	0	0	0	pol	ACA	0	0	0	pol	GAG	0	0	0	pol	CCA	0	0	0	pol	CCA	0	0	0	pol	ACA	0	0	0	pol	CAA	0	0	0
pol	TTT	0	0	0	pol	AAC	0	0	0	pol	TGG	0	0	0	pol	TAT	0	0	0	pol	GGA	0	0	0	pol	CCC	0	0	0	pol	TTT	0	0	0	pol	TTT	0	0	0	pol	TAT	0	0	0	pol	GGC	0	0	0
pol	AAA	0	0	0	pol	CTG	0	0	0	pol	TTT	0	0	0	pol	CAA	0	0	0	pol	AAA	0	0	0	pol	TTT	0	0	0	pol	AAA	0	0	0	pol	AAA	0	0	0	pol	CAA	0	0	0	pol	CAA	0	0	0
pol	AAT	0	0	0	pol	AAA	0	0	0	pol	TGG	0	0	0	pol	GTT	0	0	0	pol	TAT	0	0	0	pol	AAG	0	0	0	pol	AAT	0	0	0	pol	AAT	0	0	0	pol	ATT	0	0	0	pol	TGG	0	2	0
pol	CTG	0	0	0	pol	ACA	0	0	0	pol	TTT	0	0	0	pol	TAT	0	0	0	pol	GCA	0	0	0	pol	AAT	0	0	0	pol	CTG	0	0	0	pol	CTG	0	0	0	pol	TAT	0	0	0	pol	ACG	0	0	0
pol	AAA	0	0	0	pol	GGA	0	0	0	pol	ACG	0	0	0	pol	CAA	0	0	0	pol	AGA	0	0	0	pol	CTG	0	0	0	pol	AAA	0	0	0	pol	AAA	0	0	0	pol	CAA	0	0	0	pol	TAT	0	0	0
pol	ACA	0	0	0	pol	AAA	0	0	0	pol	AGG	0	0	0	pol	GAG	0	0	0	pol	ATG	0	0	0	pol	AAG	0	0	0	pol	ACA	0	0	0	pol	ACA	0	0	0	pol	GAG	0	0	0	pol	CAA	0	0	0
pol	GGA	0	0	0	pol	TAT	0	0	0	pol	GAG	0	0	0	pol	CCA	0	0	0	pol	AGG	0	0	0	pol	ACA	0	0	0	pol	GGA	0	0	0	pol	GGA	0	0	0	pol	CAA	0	0	0	pol	ATT	0	0	0
pol	AAA	0	0	0	pol	GCA	0	0	0	pol	GAA	0	0	0	pol	TTT	0	0	0	pol	GGT	0	0	0	pol	GGA	0	0	0	pol	AAG	0	0	0	pol	AAG	0	0	0	pol	TAT	0	0	0	pol	TAT	0	0	0
pol	TAT	0	0	0	pol	AGA	0	0	0	pol	TAT	0	0	0	pol	AAA	0	0	0	pol	GCC	0	0	0	pol	AAG	0	0	0	pol	TAT	0	0	0	pol	TAT	0	0	0	pol	AAA	0	0	0	pol	CAA	0	0	0
pol	GCA	0	0	0	pol	ATG	0	0	0	pol	AAT	0	0	0	pol	AAT	0	0	0	pol	CAC	0	0	0	pol	TAT	0	0	0	pol	GCA	0	0	0	pol	GCA	0	0	0	pol	AAT	0	0	0	pol	GAG	0	0	0
pol	AAA	0	0	0	pol	AGG	0	0	0	pol	TGG	0	0	0	pol	CTG	0	0	0	pol	ACT	0	0	0	pol	GCA	0	0	0	pol	AGA	0	0	0	pol	AAA	0	0	0	pol	CTG	0	0	0	pol	CCA	0	0	0
pol	ATG	0	0	0	pol	GGT	0	0	0	pol	CTG	0	0	0	pol	AAA	0	0	0	pol	AAT	0	0	0	pol	AAA	0	0	0	pol	ACG	0	0	0	pol	ATG	0	0	0	pol	AAA	0	0	0	pol	TTT	0	0	0
pol	AGG	0	0	0	pol	ACC	0	0	0	pol	CAA	0	0	0	pol	ACA	0	0	0	pol	GAT	0	0	0	pol	ACG	0	0	0	pol	AGG	0	0	0	pol	AGG	0	0	0	pol	ACA	0	0	0	pol	AAA	0	0	0
pol	AGT	0	0	0	pol	CAC	0	0	0	pol	GCC	0	0	0	pol	GGA	0	0	0	pol	GTA	0	0	0	pol	AGG	0	0	0	pol	GGT	0	0	0	pol	GGT	0	0	0	pol	GGA	0	0	0	pol	AAT	0	0	0
pol	ACC	0	0	0	pol	ACT	0	0	0	pol	GCC	0	0	0	pol	AAA	0	0	0	pol	AGA	0	0	0	pol	GGT	0	0	0	pol	GCC	0	0	0	pol	GCC	0	0	0	pol	AAA	0	0	0	pol	CTG	0	0	0
pol	CAC	0	0	0	pol	AAT	0	0	0	pol	TTC	0	0	0	pol	TAT	0	0	0	pol	CAA	0	0	0	pol	GCC	0	0	0	pol	CAC	0	0	0	pol	CAC	0	0	0	pol	TAT	0	0	0	pol	AAA	0	0	0
pol	ACT	0	0	0	pol	GAT	0	0	0	pol	ACC	0	0	0	pol	GCA	0	0	0	pol	TTA	0	0	0	pol	CAC	0	0	0	pol	ACT	0	0	0	pol	ACT	0	0	0	pol	GCA	0	0	0	pol	ACA	0	0	0
pol	AAT	0	0	0	pol	GTA	0	0	0	pol	CCA	0	0	0	pol	AGA	0	0	0	pol	ACA	0	0	0	pol	ACT	0	0	0	pol	AAT	0	0	0	pol	AAT	0	0	0	pol	AGA	0	0	0	pol	GGA	0	0	0
pol	GAT	0	0	0	pol	AAA	0	0	0	pol	TGG	0	0	0	pol	ACA	0	0	0	pol	GAG	0	0	0	pol	AAT	0	0	0	pol	GAT	0	0	0	pol	GAT	0	0	0	pol	ACG	0	0	0	pol	AAA	0	0	0
pol	GTA	0	0	0	pol	CAA	0	0	0	pol	CAA	0	0	0	pol	AGG	0	0	0	pol	GTA	0	0	0	pol	GAT	0	0	0	pol	GTA	0	0	0	pol	GTA	0	0	0	pol	AAG	0	0	0	pol	TAT	0	0	0
pol	AAA	0	0	0	pol	TTA	0	0	0	pol	ATT	0	0	0	pol	GGT	0	0	0	pol	GTG	0	0	0	pol	GTA	0	0	0	pol	AAA	0	0	0	pol	AAA	0	0	0	pol	GGT	0	0	0	pol	GCA	0	0	0
pol	CAA	0	0	0	pol	ACA	0	0	0	pol	GGG	0	0	0	pol	GCC	0	0	0	pol	CAA	0	0	0	pol	AAA	0	0	0	pol	CAA	0	0	0	pol	CAG	0	0	0	pol	GCC	0	0	0	pol	AGA	0	0	0
pol	TTA	0	0	0	pol	GAG	0	0	0	pol	CCT	0	0	0	pol	CAC	0	0	0	pol	AAA	0	0	0	pol	CAA	0	0	0	pol	TTA	0	0	0	pol	TTA	0	0	0	pol	CAC	0	0	0	pol	ATG	0	0	0
pol	ACA	0	0	0	pol	GCA	0	0	0	pol	AAG	0	0	0	pol	ACT	0	0	0	pol	GTA	0	0	0	pol	TTA	0	0	0	pol	ACA	0	0	0	pol	ACA	0	0	0	pol	ACT	0	0	0	pol	AGG	0	0	0
pol	GAG	0	0	0	pol	GTA	0	0	0	pol	GAG	0	0	0	pol	AAT	0	0	0	pol	ACC	0	0	0	pol	ACA	0	0	0	pol	GAG	0	0	0	pol	GAG	0	0	0	pol	AAT	0	0	0	pol	GGT	0	0	0
pol	GCA	0	0	0	pol	CAA	0	0	0	pol	GCC	0	0	0	pol	GAT	0	0	0	pol	ACA	0	0	0	pol	GAG	0	0	0	pol	GCA	0	0	0	pol	GCA	0	0	0	pol	GAT	0	0	0	pol	GCC	0	0	0
pol	GTG	0	0	0	pol	AAA	0	0	0	pol	TGG	0	0	0	pol	GTA	0	0	0	pol	GAA	0	0	0	pol	GCA	0	0	0	pol	GTG	0	0	0	pol	GTG	0	0	0	pol	GTA	0	0	0	pol	CAC	0	0	0
pol	CAA	0	0	0	pol	ATA	0	0	0	pol	AGG	0	0	0	pol	AAG	0	0	0	pol	AGC	0	0	0	pol	GTG	0	0	0	pol	CAA	0	0	0	pol	CAA	0	0	0	pol	AAA	0	0	0	pol	ACT	0	0	0
pol	AAA	0	0	0	pol	GCC	0	0	0	pol	GAG	0	0	0	pol	CAA	0	0	0	pol	ATA	0	0	0	pol	CAA	0	0	0	pol	AAA	0	0	0	pol	AAA	0	0	0	pol	CAA	0	0	0	pol	AAT	0	0	0
pol	ATA	0	0	0	pol	CAA	0	0	0	pol	GAA	0	0	0	pol	TTA	0	0	0	pol	GTA	0	0	0	pol	AAA	0	0	0	pol	ATA	0	0	0	pol	ATA	0	0	0	pol	TTA	0	0	0	pol	GAT	0	0	0
pol	GCC	0	0	0	pol	GAA	0	0	0	pol	TTT	0	0	0	pol	ACA	0	0	0	pol	ATA	0	0	0	pol	ATA	0	0	0	pol	GCC	0	0	0	pol	GCC	0	0	0	pol	ACA	0	0	0	pol	GTA	0	0	0
pol	ACA	0	0	0	pol	AGC	0	0	0	pol	TTT	0	0	0	pol	GAG	0	0	0	pol	TGG	2	0	4	pol	GCC	0	0	0	pol	ACA	0	0	0	pol	ACA	0	0	0	pol	GAG	0	0	0	pol	AAA	0	0	0
pol	GAA	0	0	0	pol	ATA	0	0	0	pol	GTC	0	0	0	pol	GCA	0	0	0	pol	GGA	0	0	0	pol	ACA	0	0	0	pol	GAA	0	0	0	pol	GAA	0	0	0	pol	GCA	0	0	0	pol	CAA	0	0	0
pol	AGC	0	0	0	pol	GTA	0	0	0	pol	CCT	0	0	0	pol	GTG	0	0	0	pol	AAA	0	0	0	pol	GAA	0	0	0	pol	GGC	0	0	0	pol	AGT	0	0	0	pol	GTG	0	0	0	pol	TTA	0	0	0
pol	ATA	0	0	0	pol	ATA	0	0	0	pol	AGT	0	0	0	pol	CAA	0	0	0	pol	ATT	0	0	0	pol	AGC	0	0	0	pol	ATA	0	0	0	pol	ATA	0	0	0	pol	CAA	0	0	0	pol	ACA	0	0	0
pol	GTA	0	0	0	pol	TGG	1	0	1	pol	CCA	0	0	0	pol	AAA	0	0	0	pol	CCT	0	0	0	pol	ATA	0	0	0	pol	GTG	0	0	0	pol	GTA	0	0	0	pol	AAA	0	0	0	pol	GAG	0	0	0
pol	ATA	0	0	0	pol	GGA	0	0	0	pol	ACC	0	0	0	pol	ATA	0	0	0	pol	AAA	0	0	0	pol	GTA	0	0	0	pol	ATA	0	0	0	pol	ATA	0	0	0	pol	ATA	0	0	0	pol	GCA	0	0	0
pol	TGG	3	2	0	pol	AAG	0	0	0	pol	GAG	0	0	0	pol	GCT	0	0	0	pol	TTT	0	0	0	pol	ATA	0	0	0	pol	TGG	0	0	0	pol	TGG	1	0	1	pol	GCC	0	0	0	pol	GTG	0	0	0
pol	GGA	0	0	0	pol	ATT	0	0	0	pol	CCT	0	0	0	pol	ACA	0	0	0	pol	AGA	0	0	0	pol	TGG	1	1	0	pol	GGA	0	0	0	pol	GGA	0	0	0	pol	ACA	0	0	0	pol	CAA	0	0	0
pol	AGG	0	0	0	pol	CCT	0	0	0	pol	CAG	0	0	0	pol	GAG	0	0	0	pol	CTA	0	0	0	pol	GGA	0	0	0	pol	AAG	0	0	0	pol	AAG	0	0	0	pol	GAA	0	0	0	pol	AAA	0	0	0
pol	ACT	0	0	0	pol	AAA	0	0	0	pol	CCC	0	0	0	pol	AGC	0	0	0	pol	CCC	0	0	0	pol	AAG	0	0	0	pol	ATT	0	0	0	pol	ACC	0	0	0	pol	AGC	0	0	0	pol	ATA	0	0	0
pol	CCT	0	0	0	pol	TTT	0	0	0	pol	GCC	0	0	0	pol	ATA	0	0	0	pol	ATA	0	0	0	pol	ACT	0	0	0	pol	CCT	0	0	0	pol	CCT	0	0	0	pol	ATA	0	0	0	pol	GCC	0	0	0
pol	AAA	0	0	0	pol	AAA	0	0	0	pol	TTA	0	0	0	pol	GTA	0	0	0	pol	CAA	0	0	0	pol	CCT	0	0	0	pol	AAA	0	0	0	pol	AAG	0	0	0	pol	GTG	0	0	0	pol	ACA	0	0	0
pol	TTT	0	0	0	pol	CTA	0	0	0	pol	AGA	0	0	0	pol	ATA	0	0	0	pol	AAA	0	0	0	pol	AAG	0	0	0	pol	TTC	0	0	0	pol	TTT	0	0	0	pol	ATA	0	0	0	pol	GAA	0	0	0
pol	AGA	0	0	0	pol	CCC	0	0	0	pol	GTG	0	0	0	pol	TGG	0	0	0	pol	GAA	0	0	0	pol	TTT	0	0	0	pol	AAA	0	0	0	pol	AAA	0	0	0	pol	TGG	3	0	1	pol	AGC	0	0	0
pol	CTA	0	0	0	pol	ATA	0	0	0	pol	GCC	0	0	0	pol	GGA	0	0	0	pol	ACA	0	0	0	pol	AAA	0	0	0	pol	TTA	0	0	0	pol	CTA	0	0	0	pol	GGA	0	0	0	pol	ATA	0	0	0
pol	CCC	0	0	0	pol	CAA	0	0	0	pol	AAG	0	0	0	pol	AAG	0	0	0	pol	TGG	0	7	0	pol	CTA	0	0	0	pol	CCC	0	0	0	pol	CCC	0	0	0	pol	AAG	0	0	0	pol	GTA	0	0	0
pol	ATA	0	0	0	pol	AAA	0	0	0	pol	AAC	0	0	0	pol	ACT	0	0	0	pol	GAA	0	0	0	pol	CCC	0	0	0	pol	ATA	0	0	0	pol	ATA	0	0	0	pol	ACC	0	0	0	pol	ATA	0	0	0
pol	CAA	0	0	0	pol	GAA	0	0	0	pol	TTA	0	0	0	pol	CCT	0	0	0	pol	ACA	0	0	0	pol	ATA	0	0	0	pol	CAA	0	0	0	pol	CAA	0	0	0	pol	CCT	0	0	0	pol	TGG	3	0	2
pol	AAA	0	0	0	pol	ACA	0	0	0	pol	AGC	0	0	0	pol	AAA	0	0	0	pol	TGG	0	1	0	pol	CAA	0	0	0	pol	AAA	0	0	0	pol	AAA	0	0	0	pol	AAG	0	0	0	pol	GGA	0	0	0
pol	GAA	0	0	0	pol	TGG	1	1	0	pol	TGG	0	0	0	pol	TTT	0	0	0	pol	TGG	0	0	0	pol	AAA	0	0	0	pol	GAA	0	0	0	pol	GAA	0	0	0	pol	TTT	0	0	0	pol	AAG	0	0	0
pol	ACA	0	0	0	pol	GAA	0	0	0	pol	CCC	0	0	0	pol	AGA	0	0	0	pol	ACA	0	0	0	pol	GAA	0	0	0	pol	ACA	0	0	0	pol	ACA	0	0	0	pol	AAA	0	0	0	pol	ACT	0	0	0
pol	TGG	2	3	0	pol	GCC	0	0	0	pol	TAC	0	0	0	pol	TTA	0	0	0	pol	GAG	0	0	0	pol	ACA	0	0	0	pol	TGG	1	1	0	pol	TGG	1	1	0	pol	TTA	0	0	0	pol	CCT	0	0	0
pol	GAA	0	0	0	pol	TGG	0	1	0	pol	AAC	0	0	0	pol	CCC	0	0	0	pol	TAT	0	0	0	pol	TGG	0	2	0	pol	GAA	0	0	0	pol	GAA	0	0	0	pol	CCC	0	0	0	pol	AAG	0	0	0
pol	GCA	0	0	0	pol	TGG	1	0	0	pol	CAA	0	0	0	pol	ATA	0	0	0	pol	TGG	0	0	0	pol	GAA	0	0	0	pol	ACA	0	0	0	pol	GCA	0	0	0	pol	ATA	0	0	0	pol	TTT	0	0	0
pol	TGG	0	3	0	pol	ATG	0	0	0	pol	AGC	0	0	0	pol	CAA	0	0	0	pol	CAA	0	0	0	pol	ACA	0	0	0	pol	TGG	0	1	0	pol	TGG	0	1	0	pol	CAG	0	0	0	pol	AGA	0	0	0
pol	TGG	0	2	2	pol	GAA	0	0	0	pol	TTA	0	0	0	pol	AAA	0	0	0	pol	GCC	0	0	0	pol	TGG	0	2	0	pol	TGG	0	1	0	pol	TGG	0	0	0	pol	AAA	0	0	0	pol	CTA	0	0	0
pol	ACG	0	0	0	pol	TAT	0	0	0	pol	CCC	0	0	0	pol	GAA	0	0	0	pol	ACC	0	0	0	pol	TGG	0	0	0	pol	ACA	0	0	0	pol	ACA	0	0	0	pol	GAA	0	0	0	pol	CCC	0	0	0
pol	GAG	0	0	0	pol	TGG	0	1	0	pol	GAG	0	0	0	pol	ACA	0	0	0	pol	TGG	0	2	1	pol	ACA	0	0	0	pol	GAG	0	0	0	pol	GAT	0	0	0	pol	ACA	0	0	0	pol	ATA	0	0	0
pol	TAT	0	0	0	pol	CAA	0	0	0	pol	ACC	0	0	0	pol	TGG	0	0	0	pol	ATT	0	0	0	pol	GAG	0	0	0	pol	TAT	0	0	0	pol	TAT	0	0	0	pol	TGG	2	1	0	pol	TTA	0	0	0
pol	TGG	0	0	0	pol	GCC	0	0	0	pol	AAA	0	0	0	pol	GAA	0	0	0	pol	CCT	0	0	0	pol	TAT	0	0	0	pol	TGG	0	0	0	pol	TGG	0	0	0	pol	GAA	0	0	0	pol	AAA	0	0	0
pol	CAG	0	0	0	pol	ACC	0	0	0	pol	AGN	0	0	0	pol	ACA	0	0	0	pol	GAG	0	0	0	pol	TGG	0	0	0	pol	CAA	0	0	0	pol	CAA	0	0	0	pol	GCA	0	0	0	pol	GAA	0	0	0
pol	GCC	0	0	0	pol	TGG	0	2	0	pol	GAA	0	0	0	pol	TGG	0	0	0	pol	TGG	1	6	1	pol	CAG	0	0	0	pol	GCC	0	0	0	pol	GCC	0	0	0	pol	TGG	0	2	0	pol	ACA	0	0	0
pol	ACC	0	0	0	pol	ATT	0	0	0	pol	CCC	0	0	0	pol	TGG	0	0	0	pol	GAA	0	0	0	pol	GCC	0	0	0	pol	ACC	0	0	0	pol	ACC	0	0	0	pol	TGG	0	2	1	pol	TGG	0	5	0
pol	TGG	0	3	2	pol	CCT	0	0	0	pol	ATA	0	0	0	pol	ATG	0	0	0	pol	TTT	0	0	0	pol	ACC	0	0	0	pol	TGG	1	0	0	pol	TGG	1	0	0	pol	ATG	0	0	0	pol	GAC	0	0	0
pol	ATT	0	0	0	pol	GAG	0	0	0	pol	GTA	0	0	0	pol	GAG	0	0	0	pol	GTC	0	0	0	pol	TGG	0	0	0	pol	ATT	0	0	0	pol	ATT	0	0	0	pol	GAG	0	0	0	pol	ACA	0	0	0
pol	CCT	0	0	0	pol	TGG	1	0	0	pol	GGA	0	0	0	pol	TAT	0	0	0	pol	AAT	0	0	0	pol	ATT	0	0	0	pol	CCT	0	0	0	pol	CCT	0	0	0	pol	TAT	0	0	0	pol	TGG	0	1	0
pol	GAG	0	0	0	pol	GAA	0	0	0	pol	GCA	0	0	0	pol	TGG	0	0	0	pol	ACC	0	0	0	pol	CCT	0	0	0	pol	GAG	0	0	0	pol	GAA	0	0	0	pol	TGG	0	0	0	pol	TGG	0	1	0
pol	TGG	2	1	0	pol	TTT	0	0	0	pol	GAA	0	0	0	pol	CAA	0	0	0	pol	CCT	0	0	0	pol	GAG	0	0	0	pol	TGG	1	0	0	pol	TGG	1	0	1	pol	CAG	0	0	0	pol	ACA	0	0	0
pol	GAG	0	0	0	pol	GTC	0	0	0	pol	ACT	0	0	0	pol	GCC	0	0	0	pol	CCC	0	0	0	pol	TGG	0	1	0	pol	GAG	0	0	0	pol	GAG	0	0	0	pol	GCT	0	0	0	pol	GAG	0	0	0
pol	TTT	0	0	0	pol	AAT	0	0	0	pol	TTC	0	0	0	pol	ACC	0	0	0	pol	TTA	0	0	0	pol	GAG	0	0	0	pol	TTT	0	0	0	pol	TTT	0	0	0	pol	ACC	0	0	0	pol	TAT	0	0	0
pol	GTC	0	0	0	pol	ACC	0	0	0	pol	TAT	0	0	0	pol	TGG	0	0	0	pol	GTG	0	0	0	pol	TTT	0	0	0	pol	GTC	0	0	0	pol	GTC	0	0	0	pol	TGG	0	1	0	pol	TGG	0	0	0
pol	AAT	0	0	0	pol	CCT	0	0	0	pol	GTA	0	0	0	pol	ATT	0	0	0	pol	AAA	0	0	0	pol	GTC	0	0	0	pol	AAT	0	0	0	pol	AAT	0	0	0	pol	ATT	0	0	0	pol	CAA	0	0	0
pol	ACC	0	0	0	pol	CCC	0	0	0	pol	GAT	0	0	0	pol	CCT	0	0	0	pol	TTA	0	0	0	pol	AAT	0	0	0	pol	ACC	0	0	0	pol	ACC	0	0	0	pol	CCT	0	0	0	pol	GCC	0	0	0
pol	CCT	0	0	0	pol	TTA	0	0	0	pol	GGG	0	0	0	pol	GAG	0	0	0	pol	TGG	0	4	0	pol	ACC	0	0	0	pol	CCT	0	0	0	pol	CCA	0	0	0	pol	GAG	0	0	0	pol	ACC	0	0	0
pol	CCC	0	0	0	pol	GTG	0	0	0	pol	GCA	0	0	0	pol	TGG	0	0	0	pol	TAC	0	0	0	pol	CCT	0	0	0	pol	CCC	0	0	0	pol	CCC	0	0	0	pol	TGG	0	3	0	pol	TGG	0	2	1
pol	TTA	0	0	0	pol	AAA	0	0	0	pol	GCT	0	0	0	pol	GAG	0	0	0	pol	CAA	0	0	0	pol	CCC	0	0	0	pol	TTG	0	0	0	pol	TTA	0	0	0	pol	GAG	0	0	0	pol	ATT	0	0	0
pol	GTG	0	0	0	pol	TTA	0	0	0	pol	AAC	0	0	0	pol	TTT	0	0	0	pol	TTA	0	0	0	pol	TTA	0	0	0	pol	GTG	0	0	0	pol	GTA	0	0	0	pol	TTT	0	0	0	pol	CCT	0	0	0
pol	AAA	0	0	0	pol	TGG	0	1	0	pol	AGA	0	0	0	pol	GTC	0	0	0	pol	GAG	0	0	0	pol	GTA	0	0	0	pol	AAA	0	0	0	pol	AAA	0	0	0	pol	GTC	0	0	0	pol	GAG	0	0	0
pol	TTA	0	0	0	pol	TAC	0	0	0	pol	GAG	0	0	0	pol	AAT	0	0	0	pol	AAA	0	0	0	pol	AAA	0	0	0	pol	TTA	0	0	0	pol	TTA	0	0	0	pol	AAT	0	0	0	pol	TGG	4	2	0
pol	TGG	0	4	0	pol	CAG	0	0	0	pol	ACT	0	0	0	pol	ACC	0	0	0	pol	GAC	0	0	0	pol	TTA	0	0	0	pol	TGG	0	2	0	pol	TGG	0	1	0	pol	ACC	0	0	0	pol	GAA	0	0	0
pol	TAC	0	0	0	pol	TTA	0	0	0	pol	AAA	0	0	0	pol	CCT	0	0	0	pol	CCC	0	0	0	pol	TGG	0	0	0	pol	TAT	0	0	0	pol	TAC	0	0	0	pol	CCT	0	0	0	pol	TTT	0	0	0
pol	CAG	0	0	0	pol	GAG	0	0	0	pol	TTA	0	0	0	pol	CCC	0	0	0	pol	ATA	0	0	0	pol	TAC	0	0	0	pol	CAG	0	0	0	pol	CAG	0	0	0	pol	CCC	0	0	0	pol	GTC	0	0	0
pol	TTA	0	0	0	pol	AAA	0	0	0	pol	GGA	0	0	0	pol	TTA	0	0	0	pol	GCA	0	0	0	pol	CAG	0	0	0	pol	TTA	0	0	0	pol	TTA	0	0	0	pol	TTA	0	0	0	pol	AAT	0	0	0
pol	GAG	0	0	0	pol	GAG	0	0	0	pol	AAA	0	0	0	pol	GTG	0	0	0	pol	GGA	0	0	0	pol	TTA	0	0	0	pol	GAG	0	0	0	pol	GAG	0	0	0	pol	GTG	0	0	0	pol	ACC	0	0	0
pol	AAA	0	0	0	pol	CCC	0	0	0	pol	GCA	0	0	0	pol	AAA	0	0	0	pol	GCA	0	0	0	pol	GAA	0	0	0	pol	AAA	0	0	0	pol	AAA	0	0	0	pol	AAA	0	0	0	pol	CCT	0	0	0
pol	GAA	0	0	0	pol	ATA	0	0	0	pol	GGA	0	0	0	pol	TTA	0	0	0	pol	GAA	0	0	0	pol	AAG	0	0	0	pol	GAA	0	0	0	pol	GAA	0	0	0	pol	TTA	0	0	0	pol	CCC	0	0	0
pol	CCC	0	0	0	pol	ATA	0	0	0	pol	TAT	0	0	0	pol	TGG	0	0	0	pol	ACT	0	0	0	pol	GAA	0	0	0	pol	CCT	0	0	0	pol	CCC	0	0	0	pol	TGG	0	4	0	pol	TTA	0	0	0
pol	ATA	0	0	0	pol	GGA	0	0	0	pol	GTA	0	0	0	pol	TAC	0	0	0	pol	TTC	0	0	0	pol	CCC	0	0	0	pol	ATA	0	0	0	pol	ATA	0	0	0	pol	TAC	0	0	0	pol	GTG	0	0	0
pol	GAA	0	0	0	pol	GCA	0	0	0	pol	ACT	0	0	0	pol	CAG	0	0	0	pol	TAT	0	0	0	pol	ATA	0	0	0	pol	GTA	0	0	0	pol	GTA	0	0	0	pol	CAA	1	0	0	pol	AAA	0	0	0
pol	GGA	0	0	0	pol	GAA	0	0	0	pol	GAC	0	0	0	pol	TTA	0	0	0	pol	GTA	0	0	0	pol	GTA	0	0	0	pol	GGA	0	0	0	pol	GGA	0	0	0	pol	TTA	0	0	0	pol	TTA	0	0	0
pol	GCA	0	0	0	pol	ACT	0	0	0	pol	AGA	0	0	0	pol	GAG	0	0	0	pol	GAT	0	0	0	pol	GGA	0	0	0	pol	GCA	0	0	0	pol	GCA	0	0	0	pol	GAG	0	0	0	pol	TGG	0	3	0
pol	GAA	0	0	0	pol	TTC	0	0	0	pol	GGA	0	0	0	pol	AAA	0	0	0	pol	GGG	0	0	0	pol	GCA	0	0	0	pol	GAA	0	0	0	pol	GAA	0	0	0	pol	AAA	0	0	0	pol	TAT	0	0	0
pol	ACT	0	0	0	pol	TAT	0	0	0	pol	AGA	0	0	0	pol	GAA	0	0	0	pol	GCA	0	0	0	pol	GAA	0	0	0	pol	ACT	0	0	0	pol	ACT	0	0	0	pol	GAA	0	0	0	pol	CAA	0	0	0
pol	TTC	0	0	0	pol	GTA	0	0	0	pol	CAA	0	0	0	pol	CCC	0	0	0	pol	GCT	0	0	0	pol	ACT	0	0	0	pol	TTC	0	0	0	pol	TTC	0	0	0	pol	CCC	0	0	0	pol	TTA	0	0	0
pol	TAT	0	0	0	pol	GAT	0	0	0	pol	AAG	0	0	0	pol	ATA	0	0	0	pol	AAC	0	0	0	pol	TTC	0	0	0	pol	TAT	0	0	0	pol	TAT	0	0	0	pol	ATA	0	0	0	pol	GAA	0	0	0
pol	GTA	0	0	0	pol	GGG	0	0	0	pol	GTT	0	0	0	pol	GTA	0	0	0	pol	AGG	0	0	0	pol	TAT	0	0	0	pol	GTA	0	0	0	pol	GTA	0	0	0	pol	GTA	0	0	0	pol	AAA	0	0	0
pol	GAT	0	0	0	pol	GCA	0	0	0	pol	ATC	0	0	0	pol	GGA	0	0	0	pol	GAG	0	0	0	pol	GTA	0	0	0	pol	GAT	0	0	0	pol	GAT	0	0	0	pol	GGG	0	0	0	pol	GAA	0	0	0
pol	GGG	0	0	0	pol	TCT	0	0	0	pol	ACC	0	0	0	pol	GCA	0	0	0	pol	ACT	0	0	0	pol	GAT	0	0	0	pol	GGA	0	0	0	pol	GGG	0	0	0	pol	GCA	0	0	0	pol	CCC	0	0	0
pol	GCA	0	0	0	pol	AAT	0	0	0	pol	CTA	0	0	0	pol	GAA	0	0	0	pol	AAG	0	0	0	pol	GGG	0	0	0	pol	GCA	0	0	0	pol	GCG	0	0	0	pol	GAA	0	0	0	pol	ATA	0	0	0
pol	GCT	0	0	0	pol	AGA	0	0	0	pol	ACT	0	0	0	pol	ACT	0	0	0	pol	TTA	0	0	0	pol	GCA	0	0	0	pol	GCT	0	0	0	pol	GCT	0	0	0	pol	ACC	0	0	0	pol	ATA	0	0	0
pol	AAC	0	0	0	pol	GAG	0	0	0	pol	GAC	0	0	0	pol	TTC	0	0	0	pol	GGA	0	0	0	pol	GCT	0	0	0	pol	AAT	0	0	0	pol	AAT	0	0	0	pol	TTC	0	0	0	pol	GGG	0	0	0
pol	AGG	0	0	0	pol	ACT	0	0	0	pol	ACA	0	0	0	pol	TAT	0	0	0	pol	AAA	0	0	0	pol	AAC	0	0	0	pol	AGG	0	0	0	pol	AGG	0	0	0	pol	TAT	0	0	0	pol	GCA	0	0	0
pol	GAG	0	0	0	pol	AAA	0	0	0	pol	ACA	0	0	0	pol	GTA	0	0	0	pol	GCA	0	0	0	pol	AGG	0	0	0	pol	GAA	0	0	0	pol	GAG	0	0	0	pol	GTA	0	0	0	pol	GAA	0	0	0
pol	ACT	0	0	0	pol	TTA	0	0	0	pol	AAT	0	0	0	pol	GAT	0	0	0	pol	GGA	0	0	0	pol	GAG	0	0	0	pol	ACT	0	0	0	pol	ACC	0	0	0	pol	GAT	0	0	0	pol	ACT	0	0	0
pol	AAA	0	0	0	pol	GGA	0	0	0	pol	CAA	0	0	0	pol	GGG	0	0	0	pol	TAT	0	0	0	pol	ACT	0	0	0	pol	AAA	0	0	0	pol	AGA	0	0	0	pol	GGG	0	0	0	pol	TTC	0	0	0
pol	TTA	0	0	0	pol	AAA	0	0	0	pol	AAG	0	0	0	pol	GCA	0	0	0	pol	GTG	0	0	0	pol	AAA	0	0	0	pol	ATA	0	0	0	pol	TTA	0	0	0	pol	GCA	0	0	0	pol	TAT	0	0	0
pol	GGA	0	0	0	pol	GCA	0	0	0	pol	ACT	0	0	0	pol	GCT	0	0	0	pol	ACT	0	0	0	pol	ATA	0	0	0	pol	GGA	0	0	0	pol	GGA	0	0	0	pol	GCT	0	0	0	pol	GTA	0	0	0
pol	AAA	0	0	0	pol	GGA	0	0	0	pol	GAG	0	0	0	pol	AAC	0	0	0	pol	AAC	0	0	0	pol	GGA	0	0	1	pol	AAA	0	0	0	pol	AAA	0	0	0	pol	AAT	0	0	0	pol	GAT	0	0	0
pol	GCA	0	0	0	pol	TAT	0	0	0	pol	TTA	0	0	0	pol	AGG	0	0	0	pol	AGA	0	0	0	pol	AAA	0	0	0	pol	GCA	0	0	0	pol	GCA	0	0	0	pol	AGA	0	0	0	pol	GGG	0	0	0
pol	GGA	0	0	0	pol	GTT	0	0	0	pol	CAC	0	0	0	pol	GAG	0	0	0	pol	GGA	0	0	0	pol	GCA	0	0	0	pol	GGA	0	0	0	pol	GGA	0	0	0	pol	GAG	0	0	0	pol	GCA	0	0	0
pol	TAT	0	0	0	pol	ACT	0	0	0	pol	GCA	0	0	0	pol	ACT	0	0	0	pol	AGA	0	0	0	pol	GGA	0	0	0	pol	TAT	0	0	0	pol	TAT	0	0	0	pol	ACT	0	0	0	pol	GCC	0	0	0
pol	GTT	0	0	0	pol	GAC	0	0	0	pol	ATT	0	0	0	pol	AAA	0	0	0	pol	CAA	0	0	0	pol	TAT	0	0	0	pol	GTT	0	0	0	pol	GTT	0	0	0	pol	AAA	0	0	0	pol	AAC	0	0	0
pol	ACT	0	0	0	pol	AGA	0	0	0	pol	CAT	0	0	0	pol	TTA	0	0	0	pol	AAA	0	0	0	pol	GTT	0	0	0	pol	ACA	0	0	0	pol	ACT	0	0	0	pol	TCA	0	0	0	pol	AGG	0	0	0
pol	AAC	0	0	0	pol	GGA	0	0	0	pol	CTA	0	0	0	pol	GGA	0	0	0	pol	GTT	0	0	0	pol	ACT	0	0	0	pol	GAC	0	0	0	pol	GAC	0	0	0	pol	GGA	0	0	0	pol	GAG	0	0	0
pol	AAA	0	0	0	pol	AGA	0	0	0	pol	GCT	0	0	0	pol	AAA	0	0	0	pol	GTC	0	0	0	pol	GAC	0	0	0	pol	AGA	0	0	0	pol	AGA	0	0	0	pol	AAA	0	0	0	pol	ACC	0	0	0
pol	GGA	0	0	0	pol	CAA	0	0	0	pol	TTG	0	0	0	pol	GCA	0	0	0	pol	TCT	0	0	0	pol	AGA	0	0	0	pol	GGA	0	0	0	pol	GGA	0	0	0	pol	GCA	0	0	0	pol	AAA	0	0	0
pol	AGG	0	0	0	pol	AAG	0	0	0	pol	AAG	0	0	0	pol	GGA	0	0	0	pol	CTA	0	0	0	pol	GGA	0	0	0	pol	AGA	0	0	0	pol	AGA	0	0	0	pol	GGC	0	0	0	pol	TTA	0	0	0
pol	CAA	0	0	0	pol	GTG	0	0	0	pol	GAT	0	0	0	pol	TAT	0	0	0	pol	ACT	0	0	0	pol	AGA	0	0	0	pol	CAA	0	0	0	pol	CAA	0	0	0	pol	TAT	0	0	0	pol	GGG	0	0	0
pol	AAA	0	0	0	pol	GTC	0	0	0	pol	TCG	0	0	0	pol	GTC	0	0	0	pol	GAC	0	0	0	pol	CAG	0	0	0	pol	AAA	0	0	0	pol	CAC	0	0	0	pol	GTT	0	0	0	pol	AAA	0	0	0
pol	GTT	0	0	0	pol	TCC	0	0	0	pol	GGA	0	0	0	pol	ACT	0	0	0	pol	ACA	0	0	0	pol	AAG	0	0	0	pol	GTT	0	0	0	pol	ATT	0	0	0	pol	ACT	0	0	0	pol	GCA	0	0	0
pol	GTC	0	0	0	pol	CTA	0	0	0	pol	CCA	0	0	0	pol	AAT	0	0	0	pol	ACA	0	0	0	pol	GTT	0	0	0	pol	GTC	0	0	0	pol	GTC	0	0	0	pol	GAC	0	0	0	pol	GGA	0	0	0
pol	CAC	0	0	0	pol	ACT	0	0	0	pol	AAA	0	0	0	pol	AAA	0	0	0	pol	AAT	0	0	0	pol	ATC	0	0	0	pol	CCT	0	0	0	pol	TCC	0	0	0	pol	AGA	0	0	0	pol	TAT	0	0	0
pol	CTA	0	0	0	pol	GAC	0	0	0	pol	GTA	0	0	0	pol	GGA	0	0	0	pol	CAG	0	0	0	pol	CCC	0	0	0	pol	CTA	0	0	0	pol	CTA	0	0	0	pol	GGA	0	0	0	pol	GTT	0	0	0
pol	ACT	0	0	0	pol	ACA	0	0	0	pol	AAT	0	0	0	pol	AGA	0	0	0	pol	AAG	0	0	0	pol	CTA	0	0	0	pol	ACG	0	0	0	pol	ACT	0	0	0	pol	AAA	0	0	0	pol	ACT	0	0	0
pol	GAC	0	0	0	pol	ACA	0	0	0	pol	GTA	0	0	0	pol	CAA	0	0	0	pol	ACT	0	0	0	pol	GCT	0	0	0	pol	GAC	0	0	0	pol	GAC	0	0	0	pol	CAA	0	0	0	pol	AAC	0	0	0
pol	ACA	0	0	0	pol	AAT	0	0	0	pol	GTA	0	0	0	pol	AAG	0	0	0	pol	GAG	0	0	0	pol	GAC	0	0	0	pol	ACA	0	0	0	pol	ACA	0	0	0	pol	AAG	0	0	0	pol	AAA	0	0	0
pol	ACA	0	0	0	pol	CAG	0	0	0	pol	ACA	0	0	0	pol	GTG	0	0	0	pol	TTA	0	0	0	pol	ACA	0	0	0	pol	ACA	0	0	0	pol	ACA	0	0	0	pol	GTT	0	0	0	pol	GGG	0	0	0
pol	AAT	0	0	0	pol	AAG	0	0	0	pol	GAC	0	0	0	pol	ATC	0	0	0	pol	CAA	0	0	0	pol	ACA	0	0	0	pol	AAT	0	0	0	pol	AAT	0	0	0	pol	GTC	0	0	0	pol	AAA	0	0	0
pol	CAG	0	0	0	pol	ACT	0	0	0	pol	TCA	0	0	0	pol	ACC	0	0	0	pol	GCA	0	0	0	pol	AAT	0	0	0	pol	CAG	0	0	0	pol	CAA	0	0	0	pol	CCC	0	0	0	pol	CAA	0	0	0
pol	AAA	0	0	0	pol	GAG	0	0	0	pol	CAA	0	0	0	pol	CTA	0	0	0	pol	ATT	0	0	0	pol	CAG	0	0	0	pol	AAG	0	0	0	pol	AAG	0	0	0	pol	CTA	0	0	0	pol	AAG	0	0	0
pol	ACT	0	0	0	pol	TTA	0	0	0	pol	TAT	0	0	0	pol	CCT	0	0	0	pol	CAC	0	0	0	pol	AAA	0	0	0	pol	ACT	0	0	0	pol	ACT	0	0	0	pol	ACT	0	0	0	pol	GTT	0	0	0
pol	GAG	0	0	0	pol	CAA	0	0	0	pol	GCA	0	0	0	pol	GAC	0	0	0	pol	TTA	0	0	0	pol	ACT	0	0	0	pol	GAG	0	0	0	pol	GAG	0	0	0	pol	GAC	0	0	0	pol	ATC	0	0	0
pol	TTG	0	0	0	pol	GCA	0	0	0	pol	TTA	0	0	0	pol	ACG	0	0	0	pol	GCT	0	0	0	pol	GAG	0	0	0	pol	TTA	0	0	0	pol	TTA	0	0	0	pol	ACA	0	0	0	pol	TCC	0	0	0
pol	CAA	0	0	0	pol	ATT	0	0	0	pol	GGA	0	0	0	pol	ACA	0	0	0	pol	TTG	0	0	0	pol	TTA	0	0	0	pol	CAG	0	0	0	pol	CAA	0	0	0	pol	ACA	0	0	0	pol	CTA	0	0	0
pol	GCA	0	0	0	pol	TGT	0	0	0	pol	ATC	0	0	0	pol	AAT	0	0	0	pol	CAG	0	0	0	pol	CAA	0	0	0	pol	GCA	0	0	0	pol	GCA	0	0	0	pol	AAT	0	0	0	pol	ACT	0	0	0
pol	ATT	0	0	0	pol	CTA	0	0	0	pol	CTT	0	0	0	pol	CAG	0	0	0	pol	GAT	0	0	0	pol	GCA	0	0	0	pol	ATT	0	0	0	pol	ATT	0	0	0	pol	CAG	0	0	0	pol	GAC	0	0	0
pol	CAT	0	0	0	pol	GCT	0	0	0	pol	CAA	0	0	0	pol	AAG	0	0	0	pol	TCA	0	0	0	pol	ATT	0	0	0	pol	CAT	0	0	0	pol	AAT	0	0	0	pol	AAG	0	0	0	pol	ACA	0	0	0
pol	CTA	0	0	0	pol	TTA	0	0	0	pol	GCA	0	0	0	pol	GCT	0	0	0	pol	GGA	0	0	0	pol	TAT	0	0	0	pol	TTA	0	0	0	pol	CTA	0	0	0	pol	ACT	0	0	0	pol	ACA	0	0	0
pol	GCT	0	0	0	pol	CAG	0	0	0	pol	CAA	0	0	0	pol	GAG	0	0	0	pol	TTA	0	0	0	pol	CTC	0	0	0	pol	GCT	0	0	0	pol	GCT	0	0	0	pol	GAG	0	0	0	pol	AAT	0	0	0
pol	TTG	0	0	0	pol	GAT	0	0	0	pol	CCA	0	0	0	pol	TTA	0	0	0	pol	GAA	0	0	0	pol	GCT	0	0	0	pol	TTG	0	0	0	pol	CTA	0	0	0	pol	TTA	0	0	0	pol	CAG	0	0	0
pol	CAG	0	0	0	pol	TCA	0	0	0	pol	GAT	0	0	0	pol	CAA	0	0	0	pol	GTA	0	0	0	pol	TTG	0	0	0	pol	CAG	0	0	0	pol	CAG	0	0	0	pol	CAA	0	0	0	pol	AAG	0	0	0
pol	GAT	0	0	0	pol	GGG	0	0	0	pol	AAA	0	0	0	pol	GCA	0	0	0	pol	AAC	0	0	0	pol	CAG	0	0	0	pol	GAT	0	0	0	pol	GAT	0	0	0	pol	GCA	0	0	0	pol	ACT	0	0	0
pol	TCG	0	0	0	pol	TTA	0	0	0	pol	AGC	0	0	0	pol	ATT	0	0	0	pol	ATA	0	0	0	pol	GAC	0	0	0	pol	TCA	0	0	0	pol	TCG	0	0	0	pol	ATT	0	0	0	pol	GAG	0	0	0
pol	GGG	0	0	0	pol	GAG	0	0	0	pol	GAA	0	0	0	pol	CTT	0	0	0	pol	GTA	0	0	0	pol	TCG	0	0	0	pol	GGA	0	0	0	pol	GGA	0	0	0	pol	TAT	0	0	0	pol	TTA	0	0	0
pol	TTA	0	0	0	pol	GTA	0	0	0	pol	TCA	0	0	0	pol	CTG	0	0	0	pol	ACA	0	0	0	pol	GGA	0	0	0	pol	TTA	0	0	0	pol	GCA	0	0	0	pol	CTG	0	0	0	pol	CAC	0	0	0
pol	GAG	0	0	0	pol	AAC	0	0	0	pol	GAG	0	0	0	pol	GCT	0	0	0	pol	GAC	0	0	0	pol	GTA	0	0	0	pol	GAA	0	0	0	pol	GAA	0	0	0	pol	GCT	0	0	0	pol	GCA	0	0	0
pol	GTA	0	0	0	pol	ATA	0	0	0	pol	TTA	0	0	0	pol	TTG	0	0	0	pol	TCA	0	0	0	pol	GAA	0	0	0	pol	GTA	0	0	0	pol	GTA	0	0	0	pol	TTA	0	0	0	pol	ATT	0	0	0
pol	AAC	0	0	0	pol	GTA	0	0	0	pol	GTC	0	0	0	pol	CAG	0	0	0	pol	CAA	0	0	0	pol	GTA	0	0	0	pol	AAT	0	0	0	pol	AAC	0	0	0	pol	CAG	0	0	0	pol	CAT	0	0	0
pol	ATA	0	0	0	pol	ACA	0	0	0	pol	AGT	0	0	0	pol	GAT	0	0	0	pol	TAT	0	0	0	pol	AAC	0	0	0	pol	ATA	0	0	0	pol	ATA	0	0	0	pol	GAT	0	0	0	pol	CTA	0	0	0
pol	GTG	0	0	0	pol	GAC	0	0	0	pol	CAG	0	0	0	pol	GCG	0	0	0	pol	GCA	0	0	0	pol	ATA	0	0	0	pol	GTA	0	0	0	pol	GTA	0	0	0	pol	TCA	0	0	0	pol	GCT	0	0	0
pol	ACA	0	0	0	pol	TCA	0	0	0	pol	ATA	0	0	0	pol	GGA	0	0	0	pol	TTA	0	0	0	pol	GTA	0	0	0	pol	ACA	0	0	0	pol	ACA	0	0	0	pol	GGA	0	0	0	pol	TTA	0	0	0
pol	GAC	0	0	0	pol	CAA	0	0	0	pol	ATA	0	0	0	pol	TTA	0	0	0	pol	GGA	0	0	0	pol	ACA	0	0	0	pol	GAC	0	0	0	pol	GAC	0	0	0	pol	TTA	0	0	0	pol	CAG	0	0	0
pol	TCA	0	0	0	pol	TAT	0	0	0	pol	GAG	0	0	0	pol	GAA	0	0	0	pol	ATC	0	0	0	pol	GAC	0	0	0	pol	TCC	0	0	0	pol	TCA	0	0	0	pol	GAA	0	0	0	pol	GAT	0	0	0
pol	CAA	0	0	0	pol	GCA	0	0	0	pol	CTG	0	0	0	pol	GTA	0	0	0	pol	ATT	0	0	0	pol	TCA	0	0	0	pol	CAA	0	0	0	pol	CAA	0	0	0	pol	GTA	0	0	0	pol	TCA	0	0	0
pol	TAT	0	0	0	pol	TTA	0	0	0	pol	TTA	0	0	0	pol	AAC	0	0	0	pol	CAA	0	0	0	pol	CAA	0	0	0	pol	TAT	0	0	0	pol	TAT	0	0	0	pol	AAC	0	0	0	pol	GGA	0	0	0
pol	GCA	0	0	0	pol	GGG	0	0	0	pol	ATA	0	0	0	pol	ATA	0	0	0	pol	GCA	0	0	0	pol	TAT	0	0	0	pol	GCA	0	0	0	pol	GCA	0	0	0	pol	ATA	0	0	0	pol	TCA	0	0	0
pol	TTA	0	0	0	pol	ATC	0	0	0	pol	AAT	0	0	0	pol	GTA	0	0	0	pol	CAA	0	0	0	pol	GCA	0	0	0	pol	TTA	0	0	0	pol	CTA	0	0	0	pol	GTA	0	0	0	pol	GAA	0	0	0
pol	GGA	0	0	0	pol	ATT	0	0	0	pol	AAG	0	0	0	pol	ACA	0	0	0	pol	CCA	0	0	0	pol	TTA	0	0	0	pol	GGA	0	0	0	pol	GGA	0	0	0	pol	ACA	0	0	0	pol	GTA	0	0	0
pol	ATC	0	0	0	pol	CAA	0	0	0	pol	GAA	0	0	0	pol	GAT	0	0	0	pol	GAT	0	0	0	pol	GGA	0	0	0	pol	ATC	0	0	0	pol	ATC	0	0	0	pol	GAC	0	0	0	pol	AAC	0	0	0
pol	CTT	0	0	0	pol	GCA	0	0	0	pol	AAG	0	0	0	pol	TCA	0	0	0	pol	AAA	0	0	0	pol	ATC	0	0	0	pol	ATC	0	0	0	pol	ATT	0	0	0	pol	TCA	0	0	0	pol	ATA	0	0	0
pol	CAA	0	0	0	pol	CAA	0	0	0	pol	ACC	0	0	0	pol	CAA	0	0	0	pol	AGT	0	0	0	pol	ATT	0	0	0	pol	CAA	0	0	0	pol	CAA	0	0	0	pol	CAA	0	0	0	pol	GTA	0	0	0
pol	GCA	0	0	0	pol	CCA	0	0	0	pol	TAC	0	0	0	pol	TAT	0	0	0	pol	GAA	0	0	0	pol	CAG	0	0	0	pol	GCA	0	0	0	pol	GCA	0	0	0	pol	TAT	0	0	0	pol	ACA	0	0	0
pol	CAA	0	0	0	pol	GAT	0	0	0	pol	CTG	0	0	0	pol	GCA	0	0	0	pol	TCA	0	0	0	pol	GCA	0	0	0	pol	CAA	0	0	0	pol	CAA	0	0	0	pol	GCA	0	0	0	pol	GAC	0	0	0
pol	CCA	0	0	0	pol	AAG	0	0	0	pol	GCA	0	0	0	pol	TTA	0	0	0	pol	GAG	0	0	0	pol	CAG	0	0	0	pol	CCA	0	0	0	pol	CCA	0	0	0	pol	TTA	0	0	0	pol	TCA	0	0	0
pol	GAT	0	0	0	pol	AGT	0	0	0	pol	TGG	0	0	0	pol	GGA	0	0	0	pol	TTA	0	0	0	pol	CCA	0	0	0	pol	GAT	0	0	0	pol	GAT	0	0	0	pol	GGA	0	0	0	pol	CAA	0	0	0
pol	AAA	0	0	0	pol	GAA	0	0	0	pol	GTA	0	0	0	pol	ATC	0	0	0	pol	GTC	0	0	0	pol	GAT	0	0	0	pol	CAG	0	0	0	pol	AAG	0	0	0	pol	ATC	0	0	0	pol	TAT	0	0	0
pol	AGT	0	0	0	pol	TCA	0	0	0	pol	CCA	0	0	0	pol	ATT	0	0	0	pol	AAT	0	0	0	pol	AGA	0	0	0	pol	AGT	0	0	0	pol	AGT	0	0	0	pol	ATT	0	0	0	pol	GCA	0	0	0
pol	GAA	0	0	0	pol	GAG	0	0	0	pol	GCA	0	0	0	pol	CAA	0	0	0	pol	CAA	0	0	0	pol	AGT	0	0	0	pol	GAA	0	0	0	pol	GAA	0	0	0	pol	CAA	0	0	0	pol	TTA	0	0	0
pol	TCA	0	0	0	pol	GTA	0	0	0	pol	CAC	0	0	0	pol	GCA	0	0	0	pol	ATA	0	0	0	pol	GAA	0	0	0	pol	TCA	0	0	0	pol	TCA	0	0	0	pol	GCA	0	0	0	pol	GGA	0	0	0
pol	GAA	0	0	0	pol	GTC	0	0	0	pol	AAA	0	0	0	pol	CAG	0	0	0	pol	ATA	0	0	0	pol	TCA	0	0	0	pol	GAG	0	0	0	pol	GAG	0	0	0	pol	CAA	0	0	0	pol	ATC	0	0	0
pol	TTA	0	0	0	pol	AAT	0	0	0	pol	GGA	0	0	0	pol	CCA	0	0	0	pol	GAG	0	0	0	pol	GAG	0	0	0	pol	ATA	0	0	0	pol	TTA	0	0	0	pol	CCA	0	0	0	pol	ATT	0	0	0
pol	GTC	0	0	0	pol	CAA	0	0	0	pol	ATT	0	0	0	pol	GAT	0	0	0	pol	GAA	0	0	0	pol	TTA	0	0	0	pol	GTC	0	0	0	pol	GTC	0	0	0	pol	GAT	0	0	0	pol	CAA	0	0	0
pol	AGT	0	0	0	pol	ATA	0	0	0	pol	GGA	0	0	0	pol	AAA	0	0	0	pol	TTA	0	0	0	pol	GTC	0	0	0	pol	AGT	0	0	0	pol	AGC	0	0	0	pol	AAG	0	0	0	pol	GCA	0	0	0
pol	CAA	0	0	0	pol	ATA	0	0	0	pol	GGA	0	0	0	pol	AGT	0	0	0	pol	ATA	0	0	0	pol	AAT	0	0	0	pol	CAA	0	0	0	pol	CAA	0	0	0	pol	AGT	0	0	0	pol	CAA	0	0	0
pol	ATA	0	0	0	pol	GAG	0	0	0	pol	AAT	0	0	0	pol	GAA	0	0	0	pol	AAA	0	0	0	pol	CAA	0	0	0	pol	ATA	0	0	0	pol	ATA	0	0	0	pol	GAG	0	0	0	pol	CCA	0	0	0
pol	ATA	0	0	0	pol	CAG	0	0	0	pol	GAA	0	0	0	pol	TCA	0	0	0	pol	AAG	0	0	0	pol	ATA	0	0	0	pol	ATA	0	0	0	pol	ATA	0	0	0	pol	TCA	0	0	0	pol	GAT	0	0	0
pol	GAG	0	0	0	pol	TTA	0	0	0	pol	CAA	0	0	0	pol	GAA	0	0	0	pol	GAA	0	0	0	pol	ATA	0	0	0	pol	GAA	0	0	0	pol	GAG	0	0	0	pol	GAG	0	0	0	pol	AAA	0	0	0
pol	CAG	0	0	0	pol	ATA	0	0	0	pol	GTA	0	0	0	pol	TTA	0	0	0	pol	AAG	0	0	0	pol	GAA	0	0	0	pol	CAG	0	0	0	pol	CAG	0	0	0	pol	TTA	0	0	0	pol	AGT	0	0	0
pol	TTA	0	0	0	pol	AAA	0	0	0	pol	GAT	0	0	0	pol	GTC	0	0	0	pol	GTC	0	0	0	pol	CAG	0	0	0	pol	TTA	0	0	0	pol	TTA	0	0	0	pol	GTC	0	0	0	pol	GAA	0	0	0
pol	ATA	0	0	0	pol	AAG	0	0	0	pol	AAA	0	0	0	pol	AGT	0	0	0	pol	TAC	0	0	0	pol	TTA	0	0	0	pol	ATA	0	0	0	pol	ATA	0	0	0	pol	AGT	0	0	0	pol	TCA	0	0	0
pol	AAA	0	0	0	pol	GAA	0	0	0	pol	TTA	0	0	0	pol	CAA	0	0	0	pol	CTG	0	0	0	pol	ATA	0	0	0	pol	AAA	0	0	0	pol	AAA	0	0	0	pol	CAA	0	0	0	pol	GAG	0	0	0
pol	AAG	0	0	0	pol	AAG	0	0	0	pol	GTC	0	0	0	pol	ATA	0	0	0	pol	GCA	0	0	0	pol	AAA	0	0	0	pol	AAG	0	0	0	pol	AAG	0	0	0	pol	ATA	0	0	0	pol	ATA	0	0	0
pol	GAA	0	0	0	pol	GTC	0	0	0	pol	AGT	0	0	0	pol	ATA	0	0	0	pol	TGG	2	5	0	pol	AAG	0	0	0	pol	GAA	0	0	0	pol	GAA	0	0	0	pol	ATA	0	0	0	pol	GTC	0	0	0
pol	AAG	0	0	0	pol	TAC	0	0	0	pol	ACT	0	0	0	pol	GAG	0	0	0	pol	GTA	0	0	0	pol	GAA	0	0	0	pol	AAG	0	0	0	pol	AAG	0	0	0	pol	GAA	0	0	0	pol	AGT	0	0	0
pol	GTC	0	0	0	pol	CTA	0	0	0	pol	GGA	0	0	0	pol	CAA	0	0	0	pol	CCA	0	0	0	pol	AAG	0	0	0	pol	GTC	0	0	0	pol	GTC	0	0	0	pol	CAG	0	0	0	pol	CAA	0	0	0
pol	TAC	0	0	0	pol	GCA	0	0	0	pol	ATC	0	0	0	pol	TTA	0	0	0	pol	GCA	0	0	0	pol	GTC	0	0	0	pol	TAC	0	0	0	pol	TAC	0	0	0	pol	TTA	0	0	0	pol	ATA	0	0	0
pol	CTG	0	0	0	pol	TGG	0	2	0	pol	AGG	0	0	0	pol	ATA	0	0	0	pol	CAC	0	0	0	pol	TAC	0	0	0	pol	CTG	0	0	0	pol	CTG	0	0	0	pol	ATA	0	0	0	pol	ATA	0	0	0
pol	GCA	0	0	0	pol	GTA	0	0	0	pol	AGA	0	0	0	pol	AAA	0	0	0	pol	AAA	0	0	0	pol	CTG	0	0	0	pol	GCA	0	0	0	pol	GCA	0	0	0	pol	AAA	0	0	0	pol	GAG	0	0	0
pol	TGG	1	2	1	pol	CCA	0	0	0	pol	GTA	0	0	0	pol	AAG	0	0	0	pol	GGA	0	0	0	pol	GCA	0	0	0	pol	TGG	0	2	0	pol	TGG	1	1	0	pol	AAG	0	0	0	pol	CAG	0	0	0
pol	GTA	0	0	0	pol	GCA	0	0	0	pol	CTA	0	0	0	pol	GAA	0	0	0	pol	ATT	0	0	0	pol	TGG	0	2	0	pol	GTA	0	0	0	pol	GTA	0	0	0	pol	GAA	0	0	0	pol	TTA	0	0	0
pol	CCA	0	0	0	pol	CAC	0	0	0	pol	TTT	0	0	0	pol	AAG	0	0	0	pol	GGA	0	0	0	pol	GTA	0	0	0	pol	CCA	0	0	0	pol	CCA	0	0	0	pol	AAG	0	0	0	pol	ATA	0	0	0
pol	GCA	0	0	0	pol	AAA	0	0	0	pol	TTA	0	0	0	pol	GTC	0	0	0	pol	GGA	0	0	0	pol	CCA	0	0	0	pol	GCA	0	0	0	pol	GCA	0	0	0	pol	GTT	0	0	0	pol	AAA	0	0	0
pol	CAC	0	0	0	pol	GGA	0	0	0	pol	GAT	0	0	0	pol	TAC	0	0	0	pol	AAT	0	0	0	pol	GCA	0	0	0	pol	CAC	0	0	0	pol	CAC	0	0	0	pol	TAC	0	0	0	pol	AAG	0	0	0
pol	AAA	0	0	0	pol	ATT	0	0	0	pol	GGA	0	0	0	pol	CTG	0	0	0	pol	GAA	0	0	0	pol	CAC	0	0	0	pol	AAA	0	0	0	pol	AAA	0	0	0	pol	CTG	0	0	0	pol	GAA	0	0	0
pol	GGA	0	0	0	pol	GGA	0	0	0	pol	ATA	0	0	0	pol	GCA	0	0	0	pol	CAA	0	0	0	pol	AAA	0	0	0	pol	GGA	0	0	0	pol	GGA	0	0	0	pol	GCA	0	0	0	pol	AAG	0	0	0
pol	ATT	0	0	0	pol	GGA	0	0	0	pol	GAT	0	0	0	pol	TGG	0	0	0	pol	GTA	0	0	0	pol	GGA	0	0	0	pol	ATT	0	0	0	pol	ATT	0	0	0	pol	TGG	2	2	0	pol	GTC	0	0	0
pol	GGA	0	0	0	pol	AAT	0	0	0	pol	AAG	0	0	0	pol	GTA	0	0	0	pol	GAT	0	0	0	pol	ATT	0	0	0	pol	GGA	0	0	0	pol	GGA	0	0	0	pol	GTA	0	0	0	pol	TAC	0	0	0
pol	GGA	0	0	0	pol	GAA	0	0	0	pol	GCC	0	0	0	pol	CCA	0	0	0	pol	AAA	0	0	0	pol	GGA	0	0	0	pol	GGA	0	0	0	pol	GGA	0	0	0	pol	CCA	0	0	0	pol	CTG	0	0	0
pol	AAT	0	0	0	pol	CAA	0	0	0	pol	CAA	0	0	0	pol	GCA	0	0	0	pol	TTA	0	0	0	pol	GGA	0	0	0	pol	AAT	0	0	0	pol	AAT	0	0	0	pol	GCA	0	0	0	pol	GCA	0	0	0
pol	GAA	0	0	0	pol	GTA	0	0	0	pol	GAA	0	0	0	pol	CAC	0	0	0	pol	GTT	0	0	0	pol	AAT	0	0	0	pol	GAG	0	0	0	pol	GAA	0	0	0	pol	CAC	0	0	0	pol	TGG	3	2	0
pol	CAA	0	0	0	pol	GAT	0	0	0	pol	GAT	0	0	0	pol	AAA	0	0	0	pol	AGT	0	0	0	pol	GAA	0	0	0	pol	CAA	0	0	0	pol	CAA	0	0	0	pol	AAA	0	0	0	pol	GTA	0	0	0
pol	GTA	0	0	0	pol	AAA	0	0	0	pol	CAT	0	0	0	pol	GGA	0	0	0	pol	ACT	0	0	0	pol	CAA	0	0	0	pol	GTA	0	0	0	pol	GTA	0	0	0	pol	GGA	0	0	0	pol	CCA	0	0	0
pol	GAT	0	0	0	pol	TTA	0	0	0	pol	GAG	0	0	0	pol	ATT	0	0	0	pol	GGA	0	0	0	pol	GTA	0	0	0	pol	GAT	0	0	0	pol	GAT	0	0	0	pol	ATT	0	0	0	pol	GCT	0	0	0
pol	AAA	0	0	0	pol	GTT	0	0	0	pol	AAA	0	0	0	pol	GGA	0	0	0	pol	ATC	0	0	0	pol	GAT	0	0	0	pol	AAA	0	0	0	pol	AAA	0	0	0	pol	GGA	0	0	0	pol	CAC	0	0	0
pol	TTA	0	0	0	pol	AGT	0	0	0	pol	TAT	0	0	0	pol	GGA	0	0	0	pol	AGG	0	0	0	pol	AAA	0	0	0	pol	TTG	0	0	0	pol	TTA	0	0	0	pol	GGA	0	0	0	pol	AAA	0	0	0
pol	GTC	0	0	0	pol	GCT	0	0	0	pol	CAC	0	0	0	pol	AAT	0	0	0	pol	AAA	0	0	0	pol	TTA	0	0	0	pol	GTC	0	0	0	pol	GTC	0	0	0	pol	AAT	0	0	0	pol	GGA	0	0	0
pol	AGT	0	0	0	pol	GGA	0	0	0	pol	AGT	0	0	0	pol	GAG	0	0	0	pol	GTA	0	0	0	pol	GTC	0	0	0	pol	AGT	0	0	0	pol	AGT	0	0	0	pol	GAA	0	0	0	pol	ATT	0	0	0
pol	TCA	0	0	0	pol	ATC	0	0	0	pol	AAC	0	0	0	pol	CAA	0	0	0	pol	CTA	0	0	0	pol	AGT	0	0	0	pol	AGT	0	0	0	pol	AAT	0	0	0	pol	CAA	0	0	0	pol	GGG	0	0	0
pol	GGA	0	0	0	pol	AGG	0	0	0	pol	TGG	0	0	0	pol	GTA	0	0	0	pol	TTT	0	0	0	pol	ACT	0	0	0	pol	GGA	0	0	0	pol	GGA	0	0	0	pol	GTA	0	0	0	pol	GGA	0	0	0
pol	ATC	0	0	0	pol	AAA	0	0	0	pol	AGA	0	0	0	pol	GAT	0	0	0	pol	TTA	0	0	0	pol	GGA	0	0	0	pol	ATC	0	0	0	pol	ATC	0	0	0	pol	GAT	0	0	0	pol	AAT	0	0	0
pol	AGG	0	0	0	pol	GTA	0	0	0	pol	GCA	0	0	0	pol	AAA	0	0	0	pol	GAT	0	0	0	pol	ATC	0	0	0	pol	AGG	0	0	0	pol	AGG	0	0	0	pol	AAA	0	0	0	pol	GAA	0	0	0
pol	AAA	0	0	0	pol	CTA	0	0	0	pol	ATG	0	0	0	pol	TTA	0	0	0	pol	GGA	0	0	0	pol	AGG	0	0	0	pol	AAA	0	0	0	pol	AGA	0	0	0	pol	TTA	0	0	0	pol	CAA	0	0	0
pol	GTA	0	0	0	pol	TTT	0	0	0	pol	GCT	0	0	0	pol	GTC	0	0	0	pol	ATA	0	0	0	pol	AAA	0	0	0	pol	GTG	0	0	0	pol	GTA	0	0	0	pol	GTT	0	0	0	pol	GTA	0	0	0
pol	CTA	0	0	0	pol	TTG	0	0	0	pol	GCT	0	0	0	pol	AGT	0	0	0	pol	GAT	0	0	0	pol	GTA	0	0	0	pol	CTA	0	0	0	pol	CTA	0	0	0	pol	AGT	0	0	0	pol	GAT	0	0	0
pol	TTT	0	0	0	pol	GAT	0	0	0	pol	GAT	0	0	0	pol	ACT	0	0	0	pol	AAG	0	0	0	pol	CTA	0	0	0	pol	TTT	0	0	0	pol	TTT	0	0	0	pol	GCT	0	0	0	pol	AAA	0	0	0
pol	TTA	0	0	0	pol	GGA	0	0	0	pol	TTT	0	0	0	pol	GGA	0	0	0	pol	GCC	0	0	0	pol	TTT	0	0	0	pol	TTA	0	0	0	pol	TTG	0	0	0	pol	GGA	0	0	0	pol	TTA	0	0	0
pol	GAT	0	0	0	pol	ATA	0	0	0	pol	AAC	0	0	0	pol	ATC	0	0	0	pol	CAA	0	0	0	pol	TTA	0	0	0	pol	GAT	0	0	0	pol	GAT	0	0	0	pol	ATC	0	0	0	pol	GTC	0	0	0
pol	GGA	0	0	0	pol	GAT	0	0	0	pol	ATA	0	0	0	pol	AGG	0	0	0	pol	GAA	0	0	0	pol	GAT	0	0	0	pol	GGA	0	0	0	pol	GGA	0	0	0	pol	AGG	0	0	0	pol	AGT	0	0	0
pol	ATA	0	0	0	pol	AAA	0	0	0	pol	CCA	0	0	0	pol	AAA	0	0	0	pol	GAA	0	0	0	pol	GGA	0	0	0	pol	ATA	0	0	0	pol	ATA	0	0	0	pol	AAA	0	0	0	pol	ACT	0	0	0
pol	GAT	0	0	0	pol	GCC	0	0	0	pol	CAT	0	0	0	pol	ATA	0	0	0	pol	CAT	0	0	0	pol	ATA	0	0	0	pol	GAT	0	0	0	pol	GAT	0	0	0	pol	GTA	0	0	0	pol	GGA	0	0	0
pol	AAG	0	0	0	pol	CAA	0	0	0	pol	GTG	0	0	0	pol	CTA	0	0	0	pol	GAG	0	0	0	pol	GAT	0	0	0	pol	AAG	0	0	0	pol	AAG	0	0	0	pol	CTA	0	0	0	pol	ATC	0	0	0
pol	GCC	0	0	0	pol	GAA	0	0	0	pol	GTA	0	0	0	pol	TTT	0	0	0	pol	AAA	0	0	0	pol	AAA	0	0	0	pol	GCC	0	0	0	pol	GCC	0	0	0	pol	TTT	0	0	0	pol	AGG	0	0	0
pol	CAA	0	0	0	pol	GAC	0	0	0	pol	GCA	0	0	0	pol	TTA	0	0	0	pol	TAT	0	0	0	pol	GCC	0	0	0	pol	CAG	0	0	0	pol	CAA	0	0	0	pol	TTG	0	0	0	pol	AAA	0	0	0
pol	GAA	0	0	0	pol	CAT	0	0	0	pol	AAA	0	0	0	pol	GAT	0	0	0	pol	CAC	0	0	0	pol	CAA	0	0	0	pol	GAA	0	0	0	pol	GAA	0	0	0	pol	GAT	0	0	0	pol	GTA	0	0	0
pol	GAA	0	0	0	pol	GAA	0	0	0	pol	GAA	0	0	0	pol	GGA	0	0	0	pol	AGT	0	0	0	pol	GAA	0	0	0	pol	GAG	0	0	0	pol	GAT	0	0	0	pol	GGA	0	0	0	pol	CTA	0	0	0
pol	CAT	0	0	0	pol	AAA	0	0	0	pol	ATA	0	0	0	pol	ATA	0	0	0	pol	AAC	0	0	0	pol	GAA	0	0	0	pol	CAT	0	0	0	pol	CAT	0	0	0	pol	ATA	0	0	0	pol	TTT	0	0	0
pol	GAG	0	0	0	pol	TAT	0	0	0	pol	GTA	0	0	0	pol	GAT	0	0	0	pol	TGG	0	3	1	pol	CAT	0	0	0	pol	GAG	0	0	0	pol	GAG	0	0	0	pol	GAT	0	0	0	pol	TTA	0	0	0
pol	AAA	0	0	0	pol	CAT	0	0	0	pol	GCC	0	0	0	pol	AGG	0	0	0	pol	AGA	0	0	0	pol	GAG	0	0	0	pol	AAA	0	0	0	pol	AAA	0	0	0	pol	AAG	0	0	0	pol	GAT	0	0	0
pol	TAT	0	0	0	pol	AGT	0	0	0	pol	AGC	0	0	0	pol	GCC	0	0	0	pol	GCA	0	0	0	pol	AAA	0	0	0	pol	TAT	0	0	0	pol	TAT	0	0	0	pol	GCC	0	0	0	pol	GGA	0	0	0
pol	CAC	0	0	0	pol	AAT	0	0	0	pol	TGT	0	0	0	pol	CAA	0	0	0	pol	ATG	0	0	0	pol	TAT	0	0	0	pol	CAC	0	0	0	pol	CAC	0	0	0	pol	CAA	0	0	0	pol	ATA	0	0	0
pol	AAT	0	0	0	pol	TGG	0	2	0	pol	GAT	0	0	0	pol	GAA	0	0	0	pol	GCT	0	0	0	pol	CAC	0	0	0	pol	AAT	0	0	0	pol	AGT	0	0	0	pol	GAT	0	0	0	pol	GAT	0	0	0
pol	AAT	0	0	0	pol	AAA	0	0	0	pol	AAA	0	0	0	pol	GAC	0	0	0	pol	AGT	0	0	0	pol	AGT	0	0	0	pol	AAT	0	0	0	pol	AAT	0	0	0	pol	GAA	0	0	0	pol	AAA	0	0	0
pol	TGG	2	3	0	pol	GCA	0	0	0	pol	TGT	0	0	0	pol	CAT	0	0	0	pol	GAT	0	0	0	pol	AAT	0	0	0	pol	TGG	0	0	0	pol	TGG	0	1	1	pol	CAT	0	0	0	pol	GCA	0	0	0
pol	AGA	0	0	0	pol	ATG	0	0	0	pol	CAG	0	0	0	pol	GAA	0	0	0	pol	TTT	0	0	0	pol	TGG	0	1	0	pol	AGA	0	0	0	pol	AGA	0	0	0	pol	GAA	0	0	0	pol	CAA	0	0	0
pol	GCA	0	0	0	pol	GCT	0	0	0	pol	CTA	0	0	0	pol	AAA	0	0	0	pol	AAT	0	0	0	pol	AGA	0	0	0	pol	GCA	0	0	0	pol	GCA	0	0	0	pol	AAA	0	0	0	pol	GAA	0	0	0
pol	ATG	0	0	0	pol	AGT	0	0	0	pol	AAA	0	0	0	pol	TAT	0	0	0	pol	CTG	0	0	0	pol	GCA	0	0	0	pol	ATG	0	0	0	pol	ATG	0	0	0	pol	TAT	0	0	0	pol	GAT	0	0	0
pol	GCT	0	0	0	pol	GAT	0	0	0	pol	GGA	0	0	0	pol	CAC	0	0	0	pol	CCC	0	0	0	pol	ATG	0	0	0	pol	GCT	0	0	0	pol	GCT	0	0	0	pol	CAC	0	0	0	pol	CAT	0	0	0
pol	AGT	0	0	0	pol	TTT	0	0	0	pol	GAA	0	0	0	pol	AGT	0	0	0	pol	CCT	0	0	0	pol	GCT	0	0	0	pol	AGT	0	0	0	pol	AAT	0	0	0	pol	AGT	0	0	0	pol	GAG	0	0	0
pol	GAT	0	0	0	pol	AAT	0	0	0	pol	GCC	0	0	0	pol	AAT	0	0	0	pol	GTG	0	0	0	pol	AGT	0	0	0	pol	GAT	0	0	0	pol	GAT	0	0	0	pol	AAT	0	0	0	pol	AAA	0	0	0
pol	TTT	0	0	0	pol	CTG	0	0	0	pol	ATG	0	0	0	pol	TGG	0	0	0	pol	GTA	0	0	0	pol	GAT	0	0	0	pol	TTT	0	0	0	pol	TTT	0	0	0	pol	TGG	1	2	0	pol	TAT	0	0	0
pol	AAC	0	0	0	pol	CCA	0	0	0	pol	CAT	0	0	0	pol	AGA	0	0	0	pol	GCA	0	0	0	pol	TTT	0	0	0	pol	GAC	0	0	0	pol	AAC	0	0	0	pol	AGA	0	0	0	pol	CAC	0	0	0
pol	CTG	0	0	0	pol	CCT	0	0	0	pol	GGA	0	0	0	pol	GCA	0	0	0	pol	AAA	0	0	0	pol	AAC	0	0	0	pol	CTG	0	0	0	pol	CTG	0	0	0	pol	GCA	0	0	0	pol	AGT	0	0	0
pol	CCA	0	0	0	pol	GTA	0	0	0	pol	CAA	0	0	0	pol	ATG	0	0	0	pol	GAA	0	0	0	pol	CTG	0	0	0	pol	CCC	0	0	0	pol	CCA	0	0	0	pol	ATG	0	0	0	pol	AAT	0	0	0
pol	CCT	0	0	0	pol	ATA	0	0	0	pol	GTA	0	0	0	pol	GCC	0	0	0	pol	ATA	0	0	0	pol	CCA	0	0	0	pol	CCT	0	0	0	pol	CCT	0	0	0	pol	GCT	0	0	0	pol	TGG	0	5	1
pol	GTA	0	0	0	pol	GCA	0	0	0	pol	GAC	0	0	0	pol	AGT	0	0	0	pol	GTA	0	0	0	pol	CCA	0	0	0	pol	GTA	0	0	0	pol	ATA	0	0	0	pol	AGT	0	0	0	pol	AAA	0	0	0
pol	ATA	0	0	0	pol	AAA	0	0	0	pol	TGT	0	0	0	pol	GAT	0	0	0	pol	GCC	0	0	0	pol	GTA	0	0	0	pol	GTA	0	0	0	pol	GTA	0	0	0	pol	GAT	0	0	0	pol	GCA	0	0	0
pol	GCA	0	0	0	pol	GAA	0	0	0	pol	AGT	0	0	0	pol	TTT	0	0	0	pol	AGC	0	0	0	pol	GTA	0	0	0	pol	GCA	0	0	0	pol	GCA	0	0	0	pol	TTT	0	0	0	pol	ATG	0	0	0
pol	AAA	0	0	0	pol	ATA	0	0	0	pol	CCA	0	0	0	pol	AAC	0	0	0	pol	TGT	0	0	0	pol	GCA	0	0	0	pol	AAA	0	0	0	pol	AAG	0	0	0	pol	AAC	0	0	0	pol	GCT	0	0	0
pol	GAA	0	0	0	pol	GTA	0	0	0	pol	GGA	0	0	0	pol	CTG	0	0	0	pol	GAT	0	0	0	pol	AAA	0	0	0	pol	GAA	0	0	0	pol	GAA	0	0	0	pol	CTG	0	0	0	pol	AGT	0	0	0
pol	ATA	0	0	0	pol	GCC	0	0	0	pol	CTA	0	0	0	pol	CCA	0	0	0	pol	AAA	0	0	0	pol	GAA	0	0	0	pol	ATA	0	0	0	pol	ATA	0	0	0	pol	CCA	0	0	0	pol	GAT	0	0	0
pol	GTG	0	0	0	pol	AGC	0	0	0	pol	TGG	0	0	0	pol	CCG	0	0	0	pol	TGT	0	0	0	pol	ATA	0	0	0	pol	GTA	0	0	0	pol	GTA	0	0	0	pol	CCT	0	0	0	pol	TTT	0	0	0
pol	GCC	0	0	0	pol	TGT	0	0	0	pol	CAA	0	0	0	pol	GTA	0	0	0	pol	CAG	0	0	0	pol	GTA	0	0	0	pol	GCC	0	0	0	pol	GCC	0	0	0	pol	GTA	0	0	0	pol	AAC	0	0	0
pol	AGT	0	0	0	pol	GAT	0	0	0	pol	CTA	0	0	0	pol	GTA	0	0	0	pol	CTA	0	0	0	pol	GCC	0	0	0	pol	AGC	0	0	0	pol	AGC	0	0	0	pol	GTA	0	0	0	pol	ATA	0	0	0
pol	TGT	0	0	0	pol	AGA	0	0	0	pol	GAT	0	0	0	pol	GCA	0	0	0	pol	AAA	0	0	0	pol	AGC	0	0	0	pol	TGT	0	0	0	pol	TGT	0	0	0	pol	GCA	0	0	0	pol	CCA	0	0	0
pol	AAT	0	0	0	pol	TGC	0	0	0	pol	TGC	0	0	0	pol	AAA	0	0	0	pol	GGA	0	0	0	pol	TGT	0	0	0	pol	GAT	0	0	0	pol	GAT	0	0	0	pol	AAA	0	0	0	pol	CCT	0	0	0
pol	AAA	0	0	0	pol	CAG	0	0	0	pol	ACA	0	0	0	pol	GAA	0	0	0	pol	GAA	0	0	0	pol	GAT	0	0	0	pol	AAA	0	0	0	pol	AAA	0	0	0	pol	GAA	0	0	0	pol	GTG	0	0	0
pol	TGT	0	0	0	pol	TTA	0	0	0	pol	CAT	0	0	0	pol	ATA	0	0	0	pol	GCC	0	0	0	pol	AAA	0	0	0	pol	TGT	0	0	0	pol	TGT	0	0	0	pol	ATA	0	0	0	pol	GTA	0	0	0
pol	CAG	0	0	0	pol	AAA	0	0	0	pol	TTA	0	0	0	pol	GTA	0	0	0	pol	ATA	0	0	0	pol	TGT	0	0	0	pol	CAG	0	0	0	pol	CAG	0	0	0	pol	GTA	0	0	0	pol	GCA	0	0	0
pol	CTA	0	0	0	pol	GGA	0	0	0	pol	GAA	0	0	0	pol	GCC	0	0	0	pol	CAT	0	0	0	pol	CAG	0	0	0	pol	CTA	0	0	0	pol	CTA	0	0	0	pol	GCC	0	0	0	pol	AAA	0	0	0
pol	AAA	0	0	0	pol	GAA	0	0	0	pol	GGA	0	0	0	pol	AGC	0	0	0	pol	GGA	0	0	0	pol	TTA	0	0	0	pol	AAA	0	0	0	pol	AAA	0	0	0	pol	AGC	0	0	0	pol	GAA	0	0	0
pol	GGA	0	0	0	pol	GCC	0	0	0	pol	AAA	0	0	0	pol	TGT	0	0	0	pol	CAA	0	0	0	pol	AAA	0	0	0	pol	GGA	0	0	0	pol	GGA	0	0	0	pol	TGT	0	0	0	pol	ATA	0	0	0
pol	GAA	0	0	0	pol	ATA	0	0	0	pol	ATT	0	0	0	pol	GAC	0	0	0	pol	GTA	0	0	0	pol	GGA	0	0	0	pol	GAA	0	0	0	pol	GAA	0	0	0	pol	GAT	0	0	0	pol	GTA	0	0	0
pol	GCC	0	0	0	pol	CAT	0	0	0	pol	ATC	0	0	0	pol	AAA	0	0	0	pol	GAC	0	0	0	pol	GAA	0	0	0	pol	GCC	0	0	0	pol	GCC	0	0	0	pol	AAA	0	0	0	pol	GCC	0	0	0
pol	ATG	0	0	0	pol	GGA	0	0	0	pol	CTG	0	0	0	pol	TGT	0	0	0	pol	TGT	0	0	0	pol	GCC	0	0	0	pol	ATG	0	0	0	pol	ATG	0	0	0	pol	TGT	0	0	0	pol	AGC	0	0	0
pol	CAT	0	0	0	pol	CAA	0	0	0	pol	GTA	0	0	0	pol	CAG	0	0	0	pol	AGC	0	0	0	pol	ATG	0	0	0	pol	CAT	0	0	0	pol	CAT	0	0	0	pol	CAG	0	0	0	pol	TGT	0	0	0
pol	GGA	0	0	0	pol	GTA	0	0	0	pol	GCT	0	0	0	pol	CTA	0	0	0	pol	CCA	0	0	0	pol	CAT	0	0	0	pol	GGA	0	0	0	pol	GGA	0	0	0	pol	CTA	0	0	0	pol	GAT	0	0	0
pol	CAA	0	0	0	pol	GAC	0	0	0	pol	GTA	0	0	0	pol	AAA	0	0	0	pol	GGA	0	0	0	pol	GGA	0	0	0	pol	CAA	0	0	0	pol	CAA	0	0	0	pol	AAA	0	0	0	pol	AAA	0	0	0
pol	GTA	0	0	0	pol	TGT	0	0	0	pol	CAT	0	0	0	pol	GGA	0	0	0	pol	ATA	0	0	0	pol	CAA	0	0	0	pol	GTA	0	0	0	pol	GTA	0	0	0	pol	GGA	0	0	0	pol	TGT	0	0	0
pol	GAC	0	0	0	pol	AGT	0	0	0	pol	GTA	0	0	0	pol	GAA	0	0	0	pol	TGG	0	0	0	pol	GTA	0	0	0	pol	GAC	0	0	0	pol	GAC	0	0	0	pol	GAA	0	0	0	pol	CAG	0	0	0
pol	TGT	0	0	0	pol	CCA	0	0	0	pol	GCC	0	0	0	pol	GCC	0	0	0	pol	CAA	0	0	0	pol	GAC	0	0	0	pol	TGT	0	0	0	pol	TGC	0	0	0	pol	GCC	0	0	0	pol	CTA	0	0	0
pol	AGT	0	0	0	pol	GGA	0	0	0	pol	AGT	0	0	0	pol	ATG	0	0	0	pol	CTA	0	0	0	pol	TGT	0	0	0	pol	AGT	0	0	0	pol	AGT	0	0	0	pol	ATG	0	0	0	pol	AAA	0	0	0
pol	CCA	0	0	0	pol	ATA	0	0	0	pol	GGA	0	0	0	pol	CAT	0	0	0	pol	GAT	0	0	0	pol	AGT	0	0	0	pol	CCA	0	0	0	pol	CCA	0	0	0	pol	CAT	0	0	0	pol	GGA	0	0	0
pol	GGA	0	0	0	pol	TGG	0	0	0	pol	TAT	0	0	0	pol	GGA	0	0	0	pol	TGT	0	0	0	pol	CCA	0	0	0	pol	GGA	0	0	0	pol	GGA	0	0	0	pol	GGA	0	0	0	pol	GAA	0	0	0
pol	ATA	0	0	0	pol	CAA	0	0	0	pol	ATA	0	0	0	pol	CAA	0	0	0	pol	ACA	0	0	0	pol	GGA	0	0	0	pol	ATA	0	0	0	pol	ATA	0	0	0	pol	CAA	0	0	0	pol	GCC	0	0	0
pol	TGG	0	1	0	pol	CTA	0	0	0	pol	GAA	0	0	0	pol	GTA	0	0	0	pol	CAC	0	0	0	pol	ATA	0	0	0	pol	TGG	0	1	0	pol	TGG	0	0	0	pol	GTA	0	0	0	pol	ATG	0	0	0
pol	CAA	0	0	0	pol	GAT	0	0	0	pol	GCA	0	0	0	pol	GAC	0	0	0	pol	TTA	0	0	0	pol	TGG	0	0	0	pol	CAG	0	0	0	pol	CAA	0	0	0	pol	GAC	0	0	0	pol	CAT	0	0	0
pol	CTA	0	0	0	pol	TGT	0	0	0	pol	GAA	0	0	0	pol	TGT	0	0	0	pol	GAA	0	0	0	pol	CAA	0	0	0	pol	CTA	0	0	0	pol	CTA	0	0	0	pol	TGT	0	0	0	pol	GGA	0	0	0
pol	GAT	0	0	0	pol	ACA	0	0	0	pol	GTT	0	0	0	pol	AGT	0	0	0	pol	GGA	0	0	0	pol	CTA	0	0	0	pol	GAT	0	0	0	pol	GAT	0	0	0	pol	AGT	0	0	0	pol	CAA	0	0	0
pol	TGT	0	0	0	pol	CAT	0	0	0	pol	ATT	0	0	0	pol	CCA	0	0	0	pol	AAA	0	0	0	pol	GAT	0	0	0	pol	TGT	0	0	0	pol	TGT	0	0	0	pol	CCA	0	0	0	pol	GTA	0	0	0
pol	ACA	0	0	0	pol	TTA	0	0	0	pol	CCA	0	0	0	pol	GGA	0	0	0	pol	ATT	0	0	0	pol	TGT	0	0	0	pol	ACA	0	0	0	pol	ACA	0	0	0	pol	GGA	0	0	0	pol	GAC	0	0	0
pol	CAT	0	0	0	pol	GAA	0	0	0	pol	GCA	0	0	0	pol	ATA	0	0	0	pol	ATC	0	0	0	pol	ACA	0	0	0	pol	CAC	0	0	0	pol	CAT	0	0	0	pol	ATA	0	0	0	pol	TGT	0	0	0
pol	TTA	0	0	0	pol	GGA	0	0	0	pol	GAG	0	0	0	pol	TGG	0	0	0	pol	CTG	0	0	0	pol	CAC	0	0	0	pol	TTA	0	0	0	pol	TTA	0	0	0	pol	TGG	0	0	0	pol	AGT	0	0	0
pol	GAA	0	0	0	pol	AAA	0	0	0	pol	ACA	0	0	0	pol	CAA	0	0	0	pol	GTA	0	0	0	pol	TTA	0	0	0	pol	GAA	0	0	0	pol	GAA	0	0	0	pol	CAA	0	0	0	pol	CCA	0	0	0
pol	GGA	0	0	0	pol	ATT	0	0	0	pol	GGG	0	0	0	pol	CTA	0	0	0	pol	GCA	0	0	0	pol	GAA	0	0	0	pol	GGA	0	0	0	pol	GGA	0	0	0	pol	CTA	0	0	0	pol	GGA	0	0	0
pol	AAA	0	0	0	pol	ATC	0	0	0	pol	CAA	0	0	0	pol	GAT	0	0	0	pol	GTT	0	0	0	pol	GGA	0	0	0	pol	AAA	0	0	0	pol	AAA	0	0	0	pol	GAT	0	0	0	pol	ATA	0	0	0
pol	GTT	0	0	0	pol	CTG	0	0	0	pol	GAA	0	0	0	pol	TGT	0	0	0	pol	CAT	0	0	0	pol	AAA	0	0	0	pol	GTT	0	0	0	pol	GTT	0	0	0	pol	TGT	0	0	0	pol	TGG	0	0	0
pol	ATC	0	0	0	pol	GTA	0	0	0	pol	ACA	0	0	0	pol	ACA	0	0	0	pol	GTA	0	0	0	pol	ATT	0	0	0	pol	ATC	0	0	0	pol	ATC	0	0	0	pol	ACA	0	0	0	pol	CAA	0	0	0
pol	CTG	0	0	0	pol	GCA	0	0	0	pol	GCA	0	0	0	pol	CAT	0	0	0	pol	GCC	0	0	0	pol	ATC	0	0	0	pol	CTA	0	0	0	pol	CTG	0	0	0	pol	CAT	0	0	0	pol	CTA	0	0	0
pol	GTA	0	0	0	pol	GTT	0	0	0	pol	TAC	0	0	0	pol	TTA	0	0	0	pol	AGT	0	0	0	pol	CTG	0	0	0	pol	GTA	0	0	0	pol	GTA	0	0	0	pol	CTA	0	0	0	pol	GAT	0	0	0
pol	GCA	0	0	0	pol	CAT	0	0	0	pol	TTT	0	0	0	pol	GAA	0	0	0	pol	GGA	0	0	0	pol	GTA	0	0	0	pol	GCA	0	0	0	pol	GCA	0	0	0	pol	GAA	0	0	0	pol	TGT	0	0	0
pol	GTT	0	0	0	pol	GTA	0	0	0	pol	ATA	0	0	0	pol	GGA	0	0	0	pol	TAT	0	0	0	pol	GCA	0	0	0	pol	GTT	0	0	0	pol	GTT	0	0	0	pol	GGA	0	0	0	pol	ACA	0	0	0
pol	CAT	0	0	0	pol	GCC	0	0	0	pol	TTA	0	0	0	pol	AAA	0	0	0	pol	ATA	0	0	0	pol	GTT	0	0	0	pol	CAT	0	0	0	pol	CAT	0	0	0	pol	AAA	0	0	0	pol	CAT	0	0	0
pol	GTA	0	0	0	pol	AGT	0	0	0	pol	AAA	0	0	0	pol	GTT	0	0	0	pol	GAA	0	0	0	pol	CAT	0	0	0	pol	GTA	0	0	0	pol	GTA	0	0	0	pol	GTT	0	0	0	pol	TTA	0	0	0
pol	GCC	0	0	0	pol	GGA	0	0	0	pol	TTA	0	0	0	pol	ATC	0	0	0	pol	GCA	0	0	0	pol	GTA	0	0	0	pol	GCC	0	0	0	pol	GCC	0	0	0	pol	ATC	0	0	0	pol	GAA	0	0	0
pol	AGT	0	0	0	pol	TAC	0	0	0	pol	GCA	0	0	0	pol	CTG	0	0	0	pol	GAA	0	0	0	pol	GCC	0	0	0	pol	AGT	0	0	0	pol	AGT	0	0	0	pol	CTG	0	0	0	pol	GGA	0	0	0
pol	GGA	0	0	0	pol	ATA	0	0	0	pol	GGA	0	0	0	pol	GTA	0	0	0	pol	GTT	0	0	0	pol	AGT	0	0	0	pol	GGT	0	0	0	pol	GGA	0	0	0	pol	GTA	0	0	0	pol	AAA	0	0	0
pol	TAT	0	0	0	pol	GAA	0	0	0	pol	AGA	0	0	0	pol	GCA	0	0	0	pol	ATT	0	0	0	pol	GGA	0	0	0	pol	TAT	0	0	0	pol	TAT	0	0	0	pol	GCA	0	0	0	pol	ATT	0	0	0
pol	ATA	0	0	0	pol	GCA	0	0	0	pol	TGG	0	0	0	pol	GTT	0	0	0	pol	CCA	0	0	0	pol	TAT	0	0	0	pol	ATA	0	0	0	pol	ATA	0	0	0	pol	GTT	0	0	0	pol	ATC	0	0	0
pol	GAA	0	0	0	pol	GAA	0	0	0	pol	CCA	0	0	0	pol	CAT	0	0	0	pol	GCA	0	0	0	pol	ATA	0	0	0	pol	GAA	0	0	0	pol	GAA	0	0	0	pol	CAT	0	0	0	pol	CTG	0	0	0
pol	GCA	0	0	0	pol	GTC	0	0	0	pol	GTA	0	0	0	pol	GTA	0	0	0	pol	GAA	0	0	0	pol	GAA	0	0	0	pol	GCA	0	0	0	pol	GCA	0	0	0	pol	GTA	0	0	0	pol	GTA	0	0	0
pol	GAA	0	0	0	pol	ATT	0	0	0	pol	AAA	0	0	0	pol	GCC	0	0	0	pol	ACA	0	0	0	pol	GCA	0	0	0	pol	GAA	0	0	0	pol	GAA	0	0	0	pol	GCC	0	0	0	pol	GCA	0	0	0
pol	GTT	0	0	0	pol	CCA	0	0	0	pol	ACA	0	0	0	pol	AGT	0	0	0	pol	GGG	0	0	0	pol	GAA	0	0	0	pol	GTT	0	0	0	pol	GTT	0	0	0	pol	AGT	0	0	0	pol	GTT	0	0	0
pol	ATC	0	0	0	pol	GCA	0	0	0	pol	GTA	0	0	0	pol	GGA	0	0	0	pol	CAG	0	0	0	pol	GTT	0	0	0	pol	ATT	0	0	0	pol	ATT	0	0	0	pol	GGA	0	0	0	pol	CAT	0	0	0
pol	CCA	0	0	0	pol	GAA	0	0	0	pol	CAT	0	0	0	pol	TAT	0	0	0	pol	GAA	0	0	0	pol	ATT	0	0	0	pol	CCA	0	0	0	pol	CCA	0	0	0	pol	TAT	0	0	0	pol	GTA	0	0	0
pol	GCA	0	0	0	pol	AAT	0	0	0	pol	ACA	0	0	0	pol	ATA	0	0	0	pol	ACA	0	0	0	pol	CCA	0	0	0	pol	GCA	0	0	0	pol	ACA	0	0	0	pol	ATA	0	0	0	pol	GCC	0	0	0
pol	GAG	0	0	0	pol	GGA	0	0	0	pol	GAC	0	0	0	pol	GAA	0	0	0	pol	GCA	0	0	0	pol	GCA	0	0	0	pol	GAG	0	0	0	pol	GAG	0	0	0	pol	GAA	0	0	0	pol	AGT	0	0	0
pol	ACA	0	0	0	pol	CAA	0	0	0	pol	AAC	0	0	0	pol	GCA	0	0	0	pol	TAC	0	0	0	pol	GAA	0	0	0	pol	ACA	0	0	0	pol	ACA	0	0	0	pol	GCA	0	0	0	pol	GGA	0	0	0
pol	GGG	0	0	0	pol	GAA	0	0	0	pol	GGC	0	0	0	pol	GAA	0	0	0	pol	TTT	0	0	0	pol	ACA	0	0	0	pol	GGG	0	0	0	pol	GGA	0	0	0	pol	GAA	0	0	0	pol	TAT	0	0	0
pol	CAG	0	0	0	pol	ACA	0	0	0	pol	CCC	0	0	0	pol	GTT	0	0	0	pol	CTC	0	0	0	pol	GGG	0	0	0	pol	CAA	0	0	0	pol	CAG	0	0	0	pol	GTT	0	0	0	pol	ATA	0	0	0
pol	GAA	0	0	0	pol	GCA	0	0	0	pol	AAT	0	0	0	pol	ATT	0	0	0	pol	TTA	0	0	0	pol	CAG	0	0	0	pol	GAA	0	0	0	pol	GAA	0	0	0	pol	ATT	0	0	0	pol	GAA	0	0	0
pol	ACA	0	0	0	pol	TAC	0	0	0	pol	TTC	0	0	0	pol	CCA	0	0	0	pol	AAG	0	0	0	pol	GAA	0	0	0	pol	ACA	0	0	0	pol	ACA	0	0	0	pol	CCA	0	0	0	pol	GCA	0	0	0
pol	GCA	0	0	0	pol	TTT	0	0	0	pol	ACC	0	0	0	pol	GCA	0	0	0	pol	CTA	0	0	0	pol	ACA	0	0	0	pol	GCA	0	0	0	pol	GCA	0	0	0	pol	GCA	0	0	0	pol	GAA	0	0	0
pol	TAC	0	0	0	pol	CTC	0	0	0	pol	AGT	0	0	0	pol	GAG	0	0	0	pol	GCA	0	0	0	pol	GCA	0	0	0	pol	TAC	0	0	0	pol	TAC	0	0	0	pol	GAG	0	0	0	pol	GTT	0	0	0
pol	TTT	0	0	0	pol	TTA	0	0	0	pol	ACT	0	0	0	pol	ACA	0	0	0	pol	GGA	0	0	0	pol	TAC	0	0	0	pol	TTT	0	0	0	pol	TTT	0	0	0	pol	ACA	0	0	0	pol	ATT	0	0	0
pol	CTT	0	0	0	pol	AAA	0	0	0	pol	ACG	0	0	0	pol	GGG	0	0	0	pol	AGA	0	0	0	pol	TTT	0	0	0	pol	ATT	0	0	0	pol	CTT	0	0	0	pol	GGG	0	0	0	pol	CCA	0	0	0
pol	TTA	0	0	0	pol	TTA	0	0	0	pol	GTT	0	0	0	pol	CAG	0	0	0	pol	TGG	0	0	0	pol	CTT	0	0	0	pol	TTA	0	0	0	pol	TTA	0	0	0	pol	CAG	0	0	0	pol	GCA	0	0	0
pol	AAA	0	0	0	pol	GCA	0	0	0	pol	AAG	0	0	0	pol	GAA	0	0	0	pol	CCA	0	0	0	pol	TTA	0	0	0	pol	AAA	0	0	0	pol	AAA	0	0	0	pol	GAA	0	0	0	pol	GAA	0	0	0
pol	TTA	0	0	0	pol	GGA	0	0	0	pol	GCC	0	0	0	pol	ACA	0	0	0	pol	GTA	0	0	0	pol	AAA	0	0	0	pol	TTA	0	0	0	pol	TTA	0	0	0	pol	ACA	0	0	0	pol	ACA	0	0	0
pol	GCA	0	0	0	pol	AGA	0	0	0	pol	GCC	0	0	0	pol	GCA	0	0	0	pol	AAA	0	0	0	pol	TTA	0	0	0	pol	GCA	0	0	0	pol	GCA	0	0	0	pol	GCA	0	0	0	pol	GGG	0	0	0
pol	GGA	0	0	0	pol	TGG	0	0	0	pol	TGT	0	0	0	pol	TAT	0	0	0	pol	ACA	0	0	0	pol	GCA	0	0	0	pol	GGA	0	0	0	pol	GGA	0	0	0	pol	TAC	0	0	0	pol	CAG	0	0	0
pol	AGA	0	0	0	pol	CCA	0	0	0	pol	TGG	0	0	0	pol	TTT	0	0	0	pol	ATA	0	0	0	pol	GGA	0	0	0	pol	AGA	0	0	0	pol	AGA	0	0	0	pol	TTT	0	0	0	pol	GAA	0	0	0
pol	TGG	0	1	0	pol	GTA	0	0	0	pol	TGG	0	0	0	pol	CTC	0	0	0	pol	CAT	0	0	0	pol	AGA	0	0	0	pol	TGG	0	0	0	pol	TGG	0	0	0	pol	CTC	0	0	0	pol	ACA	0	0	0
pol	CCA	0	0	0	pol	ACA	0	0	0	pol	GCA	0	0	0	pol	TTA	0	0	0	pol	ACA	0	0	0	pol	TGG	0	0	0	pol	CCA	0	0	0	pol	CCA	0	0	0	pol	TTA	0	0	0	pol	GCA	0	0	0
pol	GTA	0	0	0	pol	ACA	0	0	0	pol	GGG	0	0	0	pol	AAA	0	0	0	pol	GAC	0	0	0	pol	CCA	0	0	0	pol	GTA	0	0	0	pol	GTA	0	0	0	pol	AAA	0	0	0	pol	TAC	0	0	0
pol	AGA	0	0	0	pol	ATA	0	0	0	pol	ATC	0	0	0	pol	CTA	0	0	0	pol	AAT	0	0	0	pol	GTA	0	0	0	pol	AAA	0	0	0	pol	AAA	0	0	0	pol	TTA	0	0	0	pol	TTT	0	0	0
pol	ACA	0	0	0	pol	CAT	0	0	0	pol	AAG	0	0	0	pol	GCA	0	0	0	pol	GGT	0	0	0	pol	AAA	0	0	0	pol	ACA	0	0	0	pol	ACA	0	0	0	pol	GCA	0	0	0	pol	ATC	0	0	0
pol	ATA	0	0	0	pol	ACA	0	0	0	pol	CAG	0	0	0	pol	GGA	0	0	0	pol	CCC	0	0	0	pol	ACA	0	0	0	pol	ATA	0	0	0	pol	ATA	0	0	0	pol	GGA	0	0	0	pol	TTA	0	0	0
pol	CAT	0	0	0	pol	GAC	0	0	0	pol	GAA	0	0	0	pol	AGA	0	0	0	pol	AAT	0	0	0	pol	ATA	0	0	0	pol	CAT	0	0	0	pol	CAT	0	0	0	pol	AGA	0	0	0	pol	AAA	0	0	0
pol	ACA	0	0	0	pol	AAT	0	0	0	pol	TTT	0	0	0	pol	TGG	0	0	0	pol	TTC	0	0	0	pol	CAT	0	0	0	pol	ACA	0	0	0	pol	ACA	0	0	0	pol	TGG	0	0	0	pol	TTA	0	0	0
pol	GAC	0	0	0	pol	GGC	0	0	0	pol	GGT	0	0	0	pol	CCA	0	0	0	pol	ATC	0	0	0	pol	ACA	0	0	0	pol	GAC	0	0	0	pol	GAC	0	0	0	pol	CCA	0	0	0	pol	GCA	0	0	0
pol	AAT	0	0	0	pol	CCC	0	0	0	pol	ATT	0	0	0	pol	GTA	0	0	0	pol	AGT	0	0	0	pol	GAC	0	0	0	pol	AAT	0	0	0	pol	AAT	0	0	0	pol	GTA	0	0	0	pol	GGA	0	0	0
pol	GGC	0	0	0	pol	AAC	0	0	0	pol	CCC	0	0	0	pol	AAA	0	0	0	pol	ACT	0	0	0	pol	AAT	0	0	0	pol	GGC	0	0	0	pol	GGC	0	0	0	pol	AAA	0	0	0	pol	AGA	0	0	0
pol	AGC	0	0	0	pol	TTC	0	0	0	pol	TAC	0	0	0	pol	ACA	0	0	0	pol	GCA	0	0	0	pol	GGC	0	0	0	pol	CCC	0	0	0	pol	CCC	0	0	0	pol	ATA	0	0	0	pol	TGG	0	0	0
pol	AAT	0	0	0	pol	ACC	0	0	0	pol	AAT	0	0	0	pol	ATA	0	0	0	pol	GTT	0	0	0	pol	AGC	0	0	0	pol	AAT	0	0	0	pol	AAC	0	0	0	pol	ATA	0	0	0	pol	CCA	0	0	0
pol	TTC	0	0	0	pol	AGT	0	0	0	pol	CCC	0	0	0	pol	CAT	0	0	0	pol	AAG	0	0	0	pol	AAT	0	0	0	pol	TTC	0	0	0	pol	TTC	0	0	0	pol	CAT	0	0	0	pol	GTA	0	0	0
pol	ACC	0	0	0	pol	ACT	0	0	0	pol	CAA	0	0	0	pol	ACA	0	0	0	pol	GCC	0	0	0	pol	TTC	0	0	0	pol	ATC	0	0	0	pol	ATC	0	0	0	pol	ACA	0	0	0	pol	AAA	0	0	0
pol	AGT	0	0	0	pol	ACA	0	0	0	pol	AGT	0	0	0	pol	GAC	0	0	0	pol	GCC	0	0	0	pol	ATC	0	0	0	pol	AGT	0	0	0	pol	AGT	0	0	0	pol	GAC	0	0	0	pol	ACA	0	0	0
pol	ACT	0	0	0	pol	GTT	0	0	0	pol	CAA	0	0	0	pol	AAT	0	0	0	pol	TGT	0	0	0	pol	AGT	0	0	0	pol	AAT	0	0	0	pol	GCT	0	0	0	pol	AAT	0	0	0	pol	ATA	0	0	0
pol	ACT	0	0	0	pol	AAG	0	0	0	pol	GGA	0	0	0	pol	GGG	0	0	0	pol	TGG	0	2	0	pol	AAT	0	0	0	pol	ACA	0	0	0	pol	GCA	0	0	0	pol	GGC	0	0	0	pol	CAT	0	0	0
pol	GTT	0	0	0	pol	GCC	0	0	0	pol	GTA	0	0	0	pol	CCC	0	0	0	pol	TGG	0	4	0	pol	ACT	0	0	0	pol	GTT	0	0	0	pol	GTT	0	0	0	pol	GGC	0	0	0	pol	ACA	0	0	0
pol	AAG	0	0	0	pol	GCC	0	0	0	pol	GTA	0	0	0	pol	AAC	0	0	0	pol	GCG	0	0	0	pol	GTT	0	0	0	pol	AAG	0	0	0	pol	AAG	0	0	0	pol	AAT	0	0	0	pol	GAC	0	0	0
pol	GCC	0	0	0	pol	TGT	0	0	0	pol	GAA	0	0	0	pol	TTC	0	0	0	pol	GGG	0	0	0	pol	AAG	0	0	0	pol	GCC	0	0	0	pol	GCC	0	0	0	pol	TTC	0	0	0	pol	AAT	0	0	0
pol	GCC	0	0	0	pol	TGG	0	2	0	pol	TCT	0	0	0	pol	GTC	0	0	0	pol	ATC	0	0	0	pol	GCC	0	0	0	pol	GCC	0	0	0	pol	GCC	0	0	0	pol	ATC	0	0	0	pol	GGC	0	0	0
pol	TGT	0	0	0	pol	TGG	0	2	0	pol	ATG	0	0	0	pol	AGT	0	0	0	pol	AAG	0	0	0	pol	GCC	0	0	0	pol	TGT	0	0	0	pol	TGT	0	0	0	pol	AGT	0	0	0	pol	GGC	0	0	0
pol	TGG	0	2	0	pol	GCA	0	0	0	pol	AAT	0	0	0	pol	ACT	0	0	0	pol	CAG	0	0	0	pol	TGT	0	0	0	pol	TGG	0	1	0	pol	TGG	0	1	0	pol	AAT	0	0	0	pol	AAT	0	0	0
pol	TGG	0	3	0	pol	GGA	0	0	0	pol	AAA	0	0	0	pol	ACA	0	0	0	pol	GAA	0	0	0	pol	TGG	0	1	0	pol	TGG	0	1	0	pol	TGG	0	2	0	pol	GCG	0	0	0	pol	TTC	0	0	0
pol	GCG	0	0	0	pol	ATC	0	0	0	pol	GAA	0	0	0	pol	GTT	0	0	0	pol	TTT	0	0	0	pol	TGG	0	0	0	pol	GCG	0	0	0	pol	GCG	0	0	0	pol	GTT	0	0	0	pol	ACC	0	0	0
pol	GGG	0	0	0	pol	AAG	0	0	0	pol	TTA	0	0	0	pol	AAG	0	0	0	pol	GGC	0	0	0	pol	GCA	0	0	0	pol	GGG	0	0	0	pol	GGG	0	0	0	pol	AAG	0	0	0	pol	AGT	0	0	0
pol	ATA	0	0	0	pol	CAG	0	0	0	pol	AAG	0	0	0	pol	GCC	0	0	0	pol	ATT	0	0	0	pol	GGG	0	0	0	pol	ATC	0	0	0	pol	ATC	0	0	0	pol	GCC	0	0	0	pol	ACT	0	0	0
pol	AAG	0	0	0	pol	GAA	0	0	0	pol	AAA	0	0	0	pol	GCC	0	0	0	pol	CCC	0	0	0	pol	ATC	0	0	0	pol	AAG	0	0	0	pol	AAG	0	0	0	pol	GCC	0	0	0	pol	ACG	0	0	0
pol	CAG	0	0	0	pol	TTT	0	0	0	pol	ATT	0	0	0	pol	TGT	0	0	0	pol	TAC	0	0	0	pol	AAG	0	0	0	pol	CAA	0	0	0	pol	CAG	0	0	0	pol	TGC	0	0	0	pol	GTA	0	0	0
pol	GAA	0	0	0	pol	GGC	0	0	0	pol	ATA	0	0	0	pol	TGG	0	0	0	pol	AAT	0	0	0	pol	CAA	0	0	0	pol	GAA	0	0	0	pol	GAA	0	0	0	pol	TGG	0	2	0	pol	AAG	0	0	0
pol	TTT	0	0	0	pol	ATT	0	0	0	pol	GGA	0	0	0	pol	TGG	0	0	0	pol	CCC	0	0	0	pol	GAA	0	0	0	pol	TTT	0	0	0	pol	TTT	0	0	0	pol	TGG	0	3	0	pol	GCC	0	0	0
pol	GGC	0	0	0	pol	CCC	0	0	0	pol	CAG	0	0	0	pol	GCA	0	0	0	pol	CAA	0	0	0	pol	TTT	0	0	0	pol	GGC	0	0	0	pol	GGT	0	0	0	pol	GCA	0	0	0	pol	GCC	0	0	0
pol	ATT	0	0	0	pol	TAC	0	0	0	pol	GTA	0	0	0	pol	GGA	0	0	0	pol	AGT	0	0	0	pol	GGC	0	0	0	pol	ATT	0	0	0	pol	ATT	0	0	0	pol	GGG	0	0	0	pol	TGT	0	0	0
pol	CCC	0	0	0	pol	AAT	0	0	0	pol	AGG	0	0	0	pol	GTC	0	0	0	pol	CAA	0	0	0	pol	ATT	0	0	0	pol	CCC	0	0	0	pol	CCC	0	0	0	pol	ATC	0	0	0	pol	TGG	0	2	0
pol	TAC	0	0	0	pol	CCC	0	0	0	pol	GAT	0	0	0	pol	AAA	0	0	0	pol	GGA	0	0	0	pol	CCC	0	0	0	pol	TAC	0	0	0	pol	TAT	0	0	0	pol	AAG	0	0	0	pol	TGG	0	3	0
pol	AAT	0	0	0	pol	CAA	0	0	0	pol	CAG	0	0	0	pol	CAG	0	0	0	pol	GTG	0	0	0	pol	TAC	0	0	0	pol	AAT	0	0	0	pol	AAT	0	0	0	pol	CAG	0	0	0	pol	GCG	0	0	0
pol	CCC	0	0	0	pol	AGT	0	0	0	pol	GCT	0	0	0	pol	GAA	0	0	0	pol	GTA	0	0	0	pol	AAT	0	0	0	pol	CCC	0	0	0	pol	CCT	0	0	0	pol	GAA	0	0	0	pol	GGG	0	0	0
pol	CAA	0	0	0	pol	CAA	0	0	0	pol	GAA	0	0	0	pol	TTT	0	0	0	pol	GAA	0	0	0	pol	CCC	0	0	0	pol	CAA	0	0	0	pol	CAA	0	0	0	pol	TTT	0	0	0	pol	ATC	0	0	0
pol	AGT	0	0	0	pol	GGA	0	0	0	pol	CAC	0	0	0	pol	GGC	0	0	0	pol	TCT	0	0	0	pol	CAA	0	0	0	pol	AGT	0	0	0	pol	AGT	0	0	0	pol	GGC	0	0	0	pol	AAG	0	0	0
pol	CAA	0	0	0	pol	GTA	0	0	0	pol	CTT	0	0	0	pol	ATT	0	0	0	pol	ATG	0	0	0	pol	AGC	0	0	0	pol	CAA	0	0	0	pol	CAA	0	0	0	pol	ATT	0	0	0	pol	CAG	0	0	0
pol	GGA	0	0	0	pol	GTA	0	0	0	pol	AAG	0	0	0	pol	CCC	0	0	0	pol	AAT	0	0	0	pol	CAA	0	0	0	pol	GGA	0	0	0	pol	GGA	0	0	0	pol	CCC	0	0	0	pol	GAA	0	0	0
pol	GTA	0	0	0	pol	GAA	0	0	0	pol	ACA	0	0	0	pol	TAC	0	0	0	pol	AAA	0	0	0	pol	GGA	0	0	0	pol	GTA	0	0	0	pol	GTA	0	0	0	pol	TAC	0	0	0	pol	TTC	0	0	0
pol	GTA	0	0	0	pol	TCT	0	0	0	pol	GCA	0	0	0	pol	AAT	0	0	0	pol	GAA	0	0	0	pol	GTA	0	0	0	pol	GTA	0	0	0	pol	GTA	0	0	0	pol	AAT	0	0	0	pol	GGC	0	0	0
pol	GAA	0	0	0	pol	ATG	0	0	0	pol	GTA	0	0	0	pol	CCC	0	0	0	pol	TTA	0	0	0	pol	GTA	0	0	0	pol	GAA	0	0	0	pol	GAA	0	0	0	pol	CCC	0	0	0	pol	ATC	0	0	0
pol	TCT	0	0	0	pol	AAT	0	0	0	pol	CAA	0	0	0	pol	CAA	0	0	0	pol	AAG	0	0	0	pol	GAA	0	0	0	pol	TCT	0	0	0	pol	TCC	0	0	0	pol	CAA	0	0	0	pol	CCC	0	0	0
pol	ATG	0	0	0	pol	AAA	0	0	0	pol	ATG	0	0	0	pol	AGT	0	0	0	pol	AAA	0	0	0	pol	TCC	0	0	0	pol	ATG	0	0	0	pol	ATG	0	0	0	pol	AGT	0	0	0	pol	TAC	0	0	0
pol	AAT	0	0	0	pol	GAA	0	0	0	pol	GCA	0	0	0	pol	CAA	0	0	0	pol	ATT	0	0	0	pol	ATG	0	0	0	pol	AAT	0	0	0	pol	AAT	0	0	0	pol	CAA	0	0	0	pol	AAT	0	0	0
pol	AAA	0	0	0	pol	TTA	0	0	0	pol	GTA	0	0	0	pol	GGA	0	0	0	pol	ATA	0	0	0	pol	AAT	0	0	0	pol	AAA	0	0	0	pol	AAA	0	0	0	pol	GGA	0	0	0	pol	CCT	0	0	0
pol	GAA	0	0	0	pol	AAG	0	0	0	pol	TTT	0	0	0	pol	GTA	0	0	0	pol	GGA	0	0	0	pol	AAA	0	0	0	pol	GAA	0	0	0	pol	GAA	0	0	0	pol	GTA	0	0	0	pol	CAA	0	0	0
pol	TTA	0	0	0	pol	AAA	0	0	0	pol	GTC	0	0	0	pol	GTG	0	0	0	pol	CAG	0	0	0	pol	GAA	0	0	0	pol	TTA	0	0	0	pol	TTA	0	0	0	pol	GTA	0	0	0	pol	AGT	0	0	0
pol	AAG	0	0	0	pol	ATT	0	0	0	pol	CAC	0	0	0	pol	GAA	0	0	0	pol	GTA	0	0	0	pol	TTA	0	0	0	pol	AAG	0	0	0	pol	AAG	0	0	0	pol	GAA	0	0	0	pol	CAA	0	0	0
pol	CAA	0	0	0	pol	ATA	0	0	0	pol	AAT	0	0	0	pol	TCT	0	0	0	pol	AGA	0	0	0	pol	AAG	0	0	0	pol	AAA	0	0	0	pol	AAA	0	0	0	pol	TCT	0	0	0	pol	GGA	0	0	0
pol	ATT	0	0	0	pol	GGA	0	0	0	pol	TTT	0	0	0	pol	ATG	0	0	0	pol	GAT	0	0	0	pol	AAA	0	0	0	pol	ATT	0	0	0	pol	ATT	0	0	0	pol	ATG	0	0	0	pol	GTA	0	0	0
pol	ATA	0	0	0	pol	CAG	0	0	0	pol	AAA	0	0	0	pol	AAT	0	0	0	pol	CAG	0	0	0	pol	ATT	0	0	0	pol	ATA	0	0	0	pol	ATA	0	0	0	pol	AAT	0	0	0	pol	GTA	0	0	0
pol	GGA	0	0	0	pol	GTA	0	0	0	pol	AGA	0	0	0	pol	AAA	0	0	0	pol	GCT	0	0	0	pol	ATA	0	0	0	pol	GGG	0	0	0	pol	GGA	0	0	0	pol	AAA	0	0	0	pol	GAA	0	0	0
pol	CAG	0	0	0	pol	AGA	0	0	0	pol	AAA	0	0	0	pol	GAA	0	0	0	pol	GAA	0	0	0	pol	GGA	0	0	0	pol	CAG	0	0	0	pol	CAG	0	0	0	pol	GAA	0	0	0	pol	TCT	0	0	0
pol	GTA	0	0	0	pol	GAT	0	0	0	pol	GGG	0	0	0	pol	TTA	0	0	0	pol	CAT	0	0	0	pol	CAG	0	0	0	pol	GTA	0	0	0	pol	GTA	0	0	0	pol	TTA	0	0	0	pol	CTA	0	0	0
pol	AGA	0	0	0	pol	CAG	0	0	0	pol	GGG	0	0	0	pol	AAG	0	0	0	pol	CTT	0	0	0	pol	GTA	0	0	0	pol	AGA	0	0	0	pol	AGA	0	0	0	pol	AAG	0	0	0	pol	AAT	0	0	0
pol	GAT	0	0	0	pol	GCT	0	0	0	pol	ATT	0	0	0	pol	AAA	0	0	0	pol	AAG	0	0	0	pol	AGA	0	0	0	pol	GAT	0	0	0	pol	GAT	0	0	0	pol	AAA	0	0	0	pol	AAC	0	0	0
pol	CAG	0	0	0	pol	GAA	0	0	0	pol	GGG	0	0	0	pol	ATT	0	0	0	pol	ACA	0	0	0	pol	GAT	0	0	0	pol	CAG	0	0	0	pol	CAG	0	0	0	pol	ATT	0	0	0	pol	CAA	0	0	0
pol	GCT	0	0	0	pol	CAT	0	0	0	pol	GGG	0	0	0	pol	ATA	0	0	0	pol	GCA	0	0	0	pol	CAG	0	0	0	pol	GCT	0	0	0	pol	GCT	0	0	0	pol	ATA	0	0	0	pol	TTA	0	0	0
pol	GAA	0	0	0	pol	CTT	0	0	0	pol	TAC	0	0	0	pol	GGA	0	0	0	pol	GTA	0	0	0	pol	GCT	0	0	0	pol	GAA	0	0	0	pol	GAA	0	0	0	pol	GGA	0	0	0	pol	AAG	0	0	0
pol	CAT	0	0	0	pol	AAG	0	0	0	pol	AGT	0	0	0	pol	CAG	0	0	0	pol	CAA	0	0	0	pol	GAA	0	0	0	pol	CAT	0	0	0	pol	CAT	0	0	0	pol	CAG	0	0	0	pol	AAA	0	0	0
pol	CTT	0	0	0	pol	ACA	0	0	0	pol	GCA	0	0	0	pol	GTA	0	0	0	pol	ATG	0	0	0	pol	CAC	0	0	0	pol	CTT	0	0	0	pol	CTT	0	0	0	pol	GTA	0	0	0	pol	ATT	0	0	0
pol	AAG	0	0	0	pol	GCA	0	0	0	pol	GGG	0	0	0	pol	AGA	0	0	0	pol	GCA	0	0	0	pol	CTT	0	0	0	pol	AAG	0	0	0	pol	AAG	0	0	0	pol	AGA	0	0	0	pol	ATA	0	0	0
pol	ACA	0	0	0	pol	GTA	0	0	0	pol	GAA	0	0	0	pol	GAT	0	0	0	pol	GTA	0	0	0	pol	AAG	0	0	0	pol	ACA	0	0	0	pol	ACA	0	0	0	pol	GAT	0	0	0	pol	GGA	0	0	0
pol	GCA	0	0	0	pol	CAG	0	0	0	pol	AGA	0	0	0	pol	CAA	0	0	0	pol	TTC	0	0	0	pol	ACA	0	0	0	pol	GCA	0	0	0	pol	GCA	0	0	0	pol	CAG	0	0	0	pol	CAG	0	0	0
pol	GTA	0	0	0	pol	ATG	0	0	0	pol	ATA	0	0	0	pol	GCT	0	0	0	pol	ATT	0	0	0	pol	GCA	0	0	0	pol	GTG	0	0	0	pol	GTA	0	0	0	pol	GCT	0	0	0	pol	GTA	0	0	0
pol	CAA	0	0	0	pol	GCA	0	0	0	pol	GTA	0	0	0	pol	GAG	0	0	0	pol	CAC	0	0	0	pol	GTA	0	0	0	pol	CAA	0	0	0	pol	CAA	0	0	0	pol	GAA	0	0	0	pol	AGA	0	0	0
pol	ATG	0	0	0	pol	GTA	0	0	0	pol	GAC	0	0	0	pol	CAT	0	0	0	pol	AAT	0	0	0	pol	CAA	0	0	0	pol	ATG	0	0	0	pol	ATG	0	0	0	pol	CAT	0	0	0	pol	GAT	0	0	0
pol	GCA	0	0	0	pol	TTC	0	0	0	pol	ATA	0	0	0	pol	CTT	0	0	0	pol	TTT	0	0	0	pol	ATG	0	0	0	pol	GCA	0	0	0	pol	GCA	0	0	0	pol	CTT	0	0	0	pol	CAG	0	0	0
pol	GTA	0	0	0	pol	ATC	0	0	0	pol	ATA	0	0	0	pol	AAG	0	0	0	pol	AAA	0	0	0	pol	GCA	0	0	0	pol	GTA	0	0	0	pol	GTA	0	0	0	pol	AAG	0	0	0	pol	GCT	0	0	0
pol	TTC	0	0	0	pol	CAC	0	0	0	pol	GCA	0	0	0	pol	ACA	0	0	0	pol	AGA	0	0	0	pol	GTA	0	0	0	pol	TTC	0	0	0	pol	TTC	0	0	0	pol	ACA	0	0	0	pol	GAA	0	0	0
pol	ATC	0	0	0	pol	AAT	0	0	0	pol	TCA	0	0	0	pol	GCA	0	0	0	pol	AAA	0	0	0	pol	TTC	0	0	0	pol	ATC	0	0	0	pol	ATT	0	0	0	pol	GCA	0	0	0	pol	CAT	0	0	0
pol	CAC	0	0	0	pol	TTT	0	0	0	pol	GAC	0	0	0	pol	GTG	0	0	0	pol	GGG	0	0	0	pol	ATC	0	0	0	pol	CAC	0	0	0	pol	CAC	0	0	0	pol	GTA	0	0	0	pol	CTT	0	0	0
pol	AAT	0	0	0	pol	AAA	0	0	0	pol	ATA	0	0	0	pol	CAA	0	0	0	pol	GGG	0	0	0	pol	CAC	0	0	0	pol	AAT	0	0	0	pol	AAT	0	0	0	pol	CAA	0	0	0	pol	AAG	0	0	0
pol	TTT	0	0	0	pol	AGA	0	0	0	pol	CAA	0	0	0	pol	ATG	0	0	0	pol	ATT	0	0	0	pol	AAT	0	0	0	pol	TTT	0	0	0	pol	TTT	0	0	0	pol	ATG	0	0	0	pol	ACA	0	0	0
pol	AAA	0	0	0	pol	AAA	0	0	0	pol	ACT	0	0	0	pol	GCA	0	0	0	pol	GGG	0	0	0	pol	TTT	0	0	0	pol	AAA	0	0	0	pol	AAA	0	0	0	pol	GCA	0	0	0	pol	GCA	0	0	0
pol	AGA	0	0	0	pol	GGG	0	0	0	pol	AAA	0	0	0	pol	GTA	0	0	0	pol	GGA	0	0	0	pol	AAA	0	0	0	pol	AGA	0	0	0	pol	AGA	0	0	0	pol	GTT	0	0	0	pol	GTA	0	0	0
pol	AAA	0	0	0	pol	GGG	0	0	0	pol	GAA	0	0	0	pol	TTC	0	0	0	pol	TAC	0	0	0	pol	AGA	0	0	0	pol	AAA	0	0	0	pol	AAA	0	0	0	pol	TTC	0	0	0	pol	CAA	0	0	0
pol	GGG	0	0	0	pol	ATT	0	0	0	pol	TTA	0	0	0	pol	ATT	0	0	0	pol	AGT	0	0	0	pol	AAA	0	0	0	pol	GGG	0	0	0	pol	GGG	0	0	0	pol	GTC	0	0	0	pol	ATG	0	0	0
pol	GGG	0	0	0	pol	GGG	0	0	0	pol	CAA	0	0	0	pol	CAC	0	0	0	pol	GCA	0	0	0	pol	GGG	0	0	0	pol	GGG	0	0	0	pol	GGG	0	0	0	pol	CAC	0	0	0	pol	GCA	0	0	0
pol	ATT	0	0	0	pol	GGG	0	0	0	pol	AAC	0	0	0	pol	AAT	0	0	0	pol	GGG	0	0	0	pol	GGG	0	0	0	pol	ATT	0	0	0	pol	ATT	0	0	0	pol	AAT	0	0	0	pol	GTA	0	0	0
pol	GGG	0	0	0	pol	TAC	0	0	0	pol	CAA	0	0	0	pol	TTT	0	0	0	pol	GAG	0	0	0	pol	ATT	0	0	0	pol	GGG	0	0	0	pol	GGG	0	0	0	pol	TTT	0	0	0	pol	TTC	0	0	0
pol	GGG	0	0	0	pol	AGT	0	0	0	pol	ATT	0	0	0	pol	AAA	0	0	0	pol	AGA	0	0	0	pol	GGG	0	0	0	pol	GGG	0	0	0	pol	GAA	0	0	0	pol	AAA	0	0	0	pol	ATT	0	0	0
pol	TAC	0	0	0	pol	GCA	0	0	0	pol	ACA	0	0	0	pol	AGA	0	0	0	pol	ATA	0	0	0	pol	GAG	0	0	0	pol	TAC	0	0	0	pol	TAC	0	0	0	pol	AGA	0	0	0	pol	CAC	0	0	0
pol	AGT	0	0	0	pol	GGG	0	0	0	pol	AAA	0	0	0	pol	AAA	0	0	0	pol	GTA	0	0	0	pol	TAC	0	0	0	pol	AGT	0	0	0	pol	AGT	0	0	0	pol	AAA	0	0	0	pol	AAT	0	0	0
pol	GCA	0	0	0	pol	GAA	0	0	0	pol	ATT	0	0	0	pol	GGG	0	0	0	pol	GAC	0	0	0	pol	AGT	0	0	0	pol	GCA	0	0	0	pol	GCA	0	0	0	pol	GGG	0	0	0	pol	TTT	0	0	0
pol	GGG	0	0	0	pol	AGA	0	0	0	pol	CAA	0	0	0	pol	GGG	0	0	0	pol	ATA	0	0	0	pol	GCA	0	0	0	pol	GGG	0	0	0	pol	GGG	0	0	0	pol	GGG	0	0	0	pol	AAA	0	0	0
pol	GAA	0	0	0	pol	ATA	0	0	0	pol	AAT	0	0	0	pol	ATT	0	0	0	pol	ATA	0	0	0	pol	GGG	0	0	0	pol	GAA	0	0	0	pol	GAA	0	0	0	pol	ATT	0	0	0	pol	AGA	0	0	0
pol	AGA	0	0	0	pol	ATA	0	0	0	pol	TTT	0	0	0	pol	GGG	0	0	0	pol	GCA	0	0	0	pol	GAA	0	0	0	pol	AGA	0	0	0	pol	AGA	0	0	0	pol	GGG	0	0	0	pol	AAA	0	0	0
pol	ATA	0	0	0	pol	GAC	0	0	0	pol	CGG	0	0	0	pol	GGG	0	0	0	pol	ACA	0	0	0	pol	AGA	0	0	0	pol	ATA	0	0	0	pol	ATA	0	0	0	pol	GGG	0	0	0	pol	GGG	0	0	0
pol	GTA	0	0	0	pol	ATA	0	0	0	pol	GTT	0	0	0	pol	TAC	0	0	0	pol	GAC	0	0	0	pol	ATA	0	0	0	pol	ATA	0	0	0	pol	ATA	0	0	0	pol	TAC	0	0	0	pol	GGG	0	0	0
pol	GAC	0	0	0	pol	ATA	0	0	0	pol	TAT	0	0	0	pol	TGT	0	0	0	pol	ATA	0	0	0	pol	GTA	0	0	0	pol	GAC	0	0	0	pol	GAT	0	0	0	pol	AGT	0	0	0	pol	ATT	0	0	0
pol	ATA	0	0	0	pol	GCA	0	0	0	pol	TAC	0	0	0	pol	GCA	0	0	0	pol	CAA	0	0	0	pol	GAC	0	0	0	pol	ATG	0	0	0	pol	ATA	0	0	0	pol	GCA	0	0	0	pol	GGG	0	0	0
pol	ATA	0	0	0	pol	ACA	0	0	0	pol	AGA	0	0	0	pol	GGG	0	0	0	pol	ACT	0	0	0	pol	ATA	0	0	0	pol	ATA	0	0	0	pol	ATA	0	0	0	pol	GGG	0	0	0	pol	GGA	0	0	0
pol	GCA	0	0	0	pol	GAC	0	0	0	pol	GAC	0	0	0	pol	GAA	0	0	0	pol	AAA	0	0	0	pol	ATA	0	0	0	pol	GCA	0	0	0	pol	GCA	0	0	0	pol	GAA	0	0	0	pol	TAC	0	0	0
pol	TCA	0	0	0	pol	ATA	0	0	0	pol	AGC	0	0	0	pol	AGA	0	0	0	pol	GAA	0	0	0	pol	GCA	0	0	0	pol	TCA	0	0	0	pol	ACA	0	0	0	pol	AGA	0	0	0	pol	AGT	0	0	0
pol	GAC	0	0	0	pol	CAA	0	0	0	pol	AGA	0	0	0	pol	ATA	0	0	0	pol	CTA	0	0	0	pol	ACA	0	0	0	pol	GAC	0	0	0	pol	GAC	0	0	0	pol	ATA	0	0	0	pol	GCA	0	0	0
pol	ATA	0	0	0	pol	ACT	0	0	0	pol	GAA	0	0	0	pol	GTA	0	0	0	pol	CAA	0	0	0	pol	GAC	0	0	0	pol	ATA	0	0	0	pol	ATA	0	0	0	pol	ATA	0	0	0	pol	GGG	0	0	0
pol	CAA	0	0	0	pol	AGA	0	0	0	pol	CCA	0	0	0	pol	GAC	0	0	0	pol	AAA	0	0	0	pol	ATA	0	0	0	pol	CAA	0	0	0	pol	CAA	0	0	0	pol	GAC	0	0	0	pol	GAA	0	0	0
pol	ACT	0	0	0	pol	GAA	0	0	0	pol	CTT	0	0	0	pol	ATA	0	0	0	pol	CAA	0	0	0	pol	CAA	0	0	0	pol	ACT	0	0	0	pol	ACT	0	0	0	pol	ATA	0	0	0	pol	AGA	0	0	0
pol	AAA	0	0	0	pol	TTA	0	0	0	pol	TGG	0	0	0	pol	ATA	0	0	0	pol	ATT	0	0	0	pol	ACT	0	0	0	pol	AAA	0	0	0	pol	AAA	0	0	0	pol	ATA	0	0	0	pol	ATA	0	0	0
pol	GAA	0	0	0	pol	CAA	0	0	0	pol	AAA	0	0	0	pol	GCA	0	0	0	pol	ATA	0	0	0	pol	AAA	0	0	0	pol	GCA	0	0	0	pol	GAA	0	0	0	pol	GCA	0	0	0	pol	ATA	0	0	0
pol	TTA	0	0	0	pol	AAA	0	0	0	pol	GGA	0	0	0	pol	ACA	0	0	0	pol	AAA	0	0	0	pol	GAA	0	0	0	pol	TTA	0	0	0	pol	TTA	0	0	0	pol	ACA	0	0	0	pol	GAC	0	0	0
pol	CAA	0	0	0	pol	CAA	0	0	0	pol	CCA	0	0	0	pol	GAT	0	0	0	pol	ATT	0	0	0	pol	TTA	0	0	0	pol	CAA	0	0	0	pol	CAA	0	0	0	pol	GAC	0	0	0	pol	ATA	0	0	0
pol	AAA	0	0	0	pol	ATT	0	0	0	pol	GCA	0	0	0	pol	ATC	0	0	0	pol	CAA	0	0	0	pol	CAA	0	0	0	pol	AAA	0	0	0	pol	AAA	0	0	0	pol	ATA	0	0	0	pol	ATA	0	0	0
pol	CAA	0	0	0	pol	ACA	0	0	0	pol	AAA	0	0	0	pol	CAA	0	0	0	pol	AAT	0	0	0	pol	AAA	0	0	0	pol	CAA	0	0	0	pol	CAA	0	0	0	pol	CAA	0	0	0	pol	GCA	0	0	0
pol	ATT	0	0	0	pol	AAA	0	0	0	pol	CTT	0	0	0	pol	ACT	0	0	0	pol	TTT	0	0	0	pol	CAC	0	0	0	pol	ATT	0	0	0	pol	ATT	0	0	0	pol	ACT	0	0	0	pol	ACA	0	0	0
pol	ACA	0	0	0	pol	GTT	0	0	0	pol	CTG	0	0	0	pol	AAA	0	0	0	pol	CGG	0	0	0	pol	ATT	0	0	0	pol	ACA	0	0	0	pol	ACA	0	0	0	pol	AAA	0	0	0	pol	GAC	0	0	0
pol	AAA	0	0	0	pol	CAA	0	0	0	pol	TGG	0	0	0	pol	GAA	0	0	0	pol	GTT	0	0	0	pol	ACA	0	0	0	pol	AAA	0	0	0	pol	AAA	0	0	0	pol	GAA	0	0	0	pol	ATA	0	0	0
pol	GTT	0	0	0	pol	AAT	0	0	0	pol	AAA	0	0	0	pol	TTA	0	0	0	pol	TAT	0	0	0	pol	AAA	0	0	0	pol	ATT	0	0	0	pol	ATT	0	0	0	pol	CTA	0	0	0	pol	CAA	0	0	0
pol	CAA	0	0	0	pol	TTT	0	0	0	pol	GGT	0	0	0	pol	CAA	0	0	0	pol	TAC	0	0	0	pol	ATT	0	0	0	pol	CAA	0	0	0	pol	CAA	0	0	0	pol	CAA	0	0	0	pol	ACT	0	0	0
pol	AAT	0	0	0	pol	CGG	0	0	0	pol	GAA	0	0	0	pol	AAA	0	0	0	pol	AGG	0	0	0	pol	CAA	0	0	0	pol	AAT	0	0	0	pol	AAT	0	0	0	pol	AAA	0	0	0	pol	AAA	0	0	0
pol	TTT	0	0	0	pol	GTT	0	0	0	pol	GGG	0	0	0	pol	CAA	0	0	0	pol	GAC	0	0	0	pol	AAT	0	0	0	pol	TTT	0	0	0	pol	TTT	0	0	0	pol	CAA	0	0	0	pol	GAA	0	0	0
pol	CGG	0	0	0	pol	TAT	0	0	0	pol	GCA	0	0	0	pol	ATT	0	0	0	pol	AGC	0	0	0	pol	TTT	0	0	0	pol	CGG	0	0	0	pol	CGG	0	0	0	pol	ATT	0	0	0	pol	TTA	0	0	0
pol	GTT	0	0	0	pol	TAC	0	0	0	pol	GTA	0	0	0	pol	ACA	0	0	0	pol	AGA	0	0	0	pol	CGG	0	0	0	pol	GTT	0	0	0	pol	GTT	0	0	0	pol	ACA	0	0	0	pol	CAA	0	0	0
pol	TAT	0	0	0	pol	AGG	0	0	0	pol	GTA	0	0	0	pol	AAA	0	0	0	pol	GAT	0	0	0	pol	GTT	0	0	0	pol	TAT	0	0	0	pol	TAT	0	0	0	pol	AAA	0	0	0	pol	AAA	0	0	0
pol	TAC	0	0	0	pol	GAC	0	0	0	pol	ATA	0	0	0	pol	ATT	0	0	0	pol	CCA	0	0	0	pol	TAT	0	0	0	pol	TAC	0	0	0	pol	TAC	0	0	0	pol	ATT	0	0	0	pol	CAA	0	0	0
pol	AGG	0	0	0	pol	AGC	0	0	0	pol	CAA	0	0	0	pol	CAA	0	0	0	pol	CTT	0	0	0	pol	TAC	0	0	0	pol	AGG	0	0	0	pol	AGG	0	0	0	pol	CAA	0	0	0	pol	ATT	0	0	0
pol	GAC	0	0	0	pol	AGA	0	0	0	pol	GAT	0	0	0	pol	AAT	0	0	0	pol	TGG	0	0	1	pol	AGG	0	0	0	pol	GAC	0	0	0	pol	GAC	0	0	0	pol	AAT	0	0	0	pol	TCA	0	0	0
pol	AGC	0	0	0	pol	GAT	0	0	0	pol	AAT	0	0	0	pol	TTT	0	0	0	pol	AAA	0	0	0	pol	GAC	0	0	0	pol	AGC	0	0	0	pol	AGC	0	0	0	pol	TTT	0	0	0	pol	AAA	0	0	0
pol	AGA	0	0	0	pol	CCA	0	0	0	pol	AGT	0	0	0	pol	CGG	0	0	0	pol	GGA	0	0	0	pol	AGC	0	0	0	pol	AGA	0	0	0	pol	AGA	0	0	0	pol	CGG	0	0	0	pol	ATT	0	0	0
pol	GAT	0	0	0	pol	CTT	0	0	0	pol	GAT	0	0	0	pol	GTT	0	0	0	pol	CCA	0	0	0	pol	AGA	0	0	0	pol	GAT	0	0	0	pol	GAT	0	0	0	pol	GTT	0	0	0	pol	CAA	0	0	0
pol	CCA	0	0	0	pol	TGG	0	1	0	pol	ATA	0	0	0	pol	TAT	0	0	0	pol	GCA	0	0	0	pol	GAT	0	0	0	pol	CCA	0	0	0	pol	CCA	0	0	0	pol	TAT	0	0	0	pol	AAT	0	0	0
pol	CTT	0	0	0	pol	AAA	0	0	0	pol	AAA	0	0	0	pol	TAC	0	0	0	pol	AAG	0	0	0	pol	CCA	0	0	0	pol	CTT	0	0	0	pol	CTT	0	0	0	pol	TAC	0	0	0	pol	TTT	0	0	0
pol	TGG	0	1	1	pol	GGA	0	0	0	pol	GTA	0	0	0	pol	AGG	0	0	0	pol	CTC	0	0	0	pol	CTG	0	0	0	pol	TGG	0	0	0	pol	TGG	0	1	0	pol	AGA	0	0	0	pol	CGG	0	0	0
pol	AAA	0	0	0	pol	CCA	0	0	0	pol	GTG	0	0	0	pol	GAC	0	0	0	pol	CTC	0	0	0	pol	TGG	0	0	0	pol	AAA	0	0	0	pol	AAA	0	0	0	pol	GAC	0	0	0	pol	GTT	0	0	0
pol	GGA	0	0	0	pol	GCA	0	0	0	pol	CCA	0	0	0	pol	AGC	0	0	0	pol	TGG	0	0	0	pol	AAA	0	0	0	pol	GGA	0	0	0	pol	GGA	0	0	0	pol	AGC	0	0	0	pol	TAT	0	0	0
pol	CCA	0	0	0	pol	AAG	0	0	0	pol	AGG	0	0	0	pol	AGA	0	0	0	pol	AAA	0	0	0	pol	GGA	0	0	0	pol	CCA	0	0	0	pol	CCA	0	0	0	pol	AGA	0	0	0	pol	TTC	0	0	0
pol	GCA	0	0	0	pol	CTG	0	0	0	pol	AGA	0	0	0	pol	GAT	0	0	0	pol	GGT	0	0	0	pol	CCA	0	0	0	pol	GCA	0	0	0	pol	GCA	0	0	0	pol	GAC	0	0	0	pol	AGG	0	0	0
pol	AAG	0	0	0	pol	CTC	0	0	0	pol	AAA	0	0	0	pol	CCC	0	0	0	pol	GAA	0	0	0	pol	GCA	0	0	0	pol	AAA	0	0	0	pol	AAG	0	0	0	pol	CCA	0	0	0	pol	GAC	0	0	0
pol	CTG	0	0	0	pol	TGG	0	0	0	pol	GCA	0	0	0	pol	ATT	0	0	0	pol	GGG	0	0	0	pol	AAA	0	0	0	pol	CTT	0	0	0	pol	CTT	0	0	0	pol	CTT	0	0	0	pol	AGC	0	0	0
pol	CTC	0	0	0	pol	AAA	0	0	0	pol	AAA	0	0	0	pol	TGG	0	0	0	pol	GCA	0	0	0	pol	CTA	0	0	0	pol	CTT	0	0	0	pol	CTC	0	0	0	pol	TGG	0	0	0	pol	AGA	0	0	0
pol	TGG	0	1	1	pol	GGT	0	0	0	pol	ATC	0	0	0	pol	AAA	0	0	0	pol	GTA	0	0	0	pol	CTC	0	0	0	pol	TGG	0	1	0	pol	TGG	0	0	0	pol	AAA	0	0	0	pol	GAT	0	0	0
pol	AAA	0	0	0	pol	GAA	0	0	0	pol	ATT	0	0	0	pol	GGA	0	0	0	pol	GTA	0	0	0	pol	TGG	0	0	0	pol	AAA	0	0	0	pol	AAA	0	0	0	pol	GGA	0	0	0	pol	CCA	0	0	0
pol	GGT	0	0	0	pol	GGA	0	0	0	pol	AGG	0	0	0	pol	CCA	0	0	0	pol	ATA	0	0	0	pol	AAA	0	0	0	pol	GGT	0	0	0	pol	GGT	0	0	0	pol	CCA	0	0	0	pol	CTT	0	0	0
pol	GAA	0	0	0	pol	GCA	0	0	0	pol	GAT	0	0	0	pol	GCA	0	0	0	pol	CAG	0	0	0	pol	GGT	0	0	0	pol	GAA	0	0	0	pol	GAA	0	0	0	pol	GCA	0	0	0	pol	TGG	0	1	0
pol	GGA	0	0	0	pol	GTA	0	0	0	pol	TAT	0	0	0	pol	AAG	0	0	0	pol	GAT	0	0	0	pol	GAA	0	0	0	pol	GGG	0	0	0	pol	GGG	0	0	0	pol	AAG	0	0	0	pol	AAA	0	0	0
pol	GCA	0	0	0	pol	GTA	0	0	0	pol	GGA	0	0	0	pol	CTG	0	0	0	pol	AAT	0	0	0	pol	GGG	0	0	0	pol	GCA	0	0	0	pol	GCA	0	0	0	pol	CTT	0	0	0	pol	GGA	0	0	0
pol	GTG	0	0	0	pol	ATA	0	0	0	pol	AAA	0	0	0	pol	CTC	0	0	0	pol	AGT	0	0	0	pol	GCA	0	0	0	pol	GTA	0	0	0	pol	GTA	0	0	0	pol	CTC	0	0	0	pol	CCA	0	0	0
pol	GTA	0	0	0	pol	CAA	0	0	0	pol	CAG	0	0	0	pol	TGG	0	0	0	pol	GAA	0	0	0	pol	GTA	0	0	0	pol	GTA	0	0	0	pol	GTG	0	0	0	pol	TGG	0	0	0	pol	GCA	0	0	0
pol	ATA	0	0	0	pol	GAT	0	0	0	pol	ATG	0	0	0	pol	AAA	0	0	0	pol	ATA	0	0	0	pol	GTA	0	0	0	pol	ATC	0	0	0	pol	ATA	0	0	0	pol	AAA	0	0	0	pol	AAA	0	0	0
pol	CAA	0	0	0	pol	AAT	0	0	0	pol	GCA	0	0	0	pol	GGT	0	0	0	pol	AAA	0	0	0	pol	ATA	0	0	0	pol	CAA	0	0	0	pol	CAA	0	0	0	pol	GGT	0	0	0	pol	CTT	0	0	0
pol	GAT	0	0	0	pol	AGT	0	0	0	pol	GGT	0	0	0	pol	GAA	0	0	0	pol	GTA	0	0	0	pol	CAA	0	0	0	pol	GAT	0	0	0	pol	GAT	0	0	0	pol	GAA	0	0	0	pol	CTC	0	0	0
pol	AAT	0	0	0	pol	GAC	0	0	0	pol	GAT	0	0	0	pol	GGG	0	0	0	pol	GTG	0	0	0	pol	GAT	0	0	0	pol	AAT	0	0	0	pol	CAT	0	0	0	pol	GGG	0	0	0	pol	TGG	0	1	0
pol	AGT	0	0	0	pol	ATA	0	0	0	pol	GAT	0	0	0	pol	GCA	0	0	0	pol	CCA	0	0	0	pol	AAT	0	0	0	pol	AGT	0	0	0	pol	AGT	0	0	0	pol	GCA	0	0	0	pol	AAA	0	0	0
pol	GAC	0	0	0	pol	AAA	0	0	0	pol	TGT	0	0	0	pol	GTA	0	0	0	pol	AGA	0	0	0	pol	AGT	0	0	0	pol	GAA	0	0	0	pol	GAA	0	0	0	pol	GTA	0	0	0	pol	GGT	0	0	0
pol	ATA	0	0	0	pol	GTA	0	0	0	pol	GTG	0	0	0	pol	GTA	0	0	0	pol	AGA	0	0	0	pol	GAA	0	0	0	pol	ATA	0	0	0	pol	ATA	0	0	0	pol	GTA	0	0	0	pol	GAA	0	0	0
pol	AAA	0	0	0	pol	GTG	0	0	0	pol	GCA	0	0	0	pol	ATA	0	0	0	pol	AAA	0	0	0	pol	ATA	0	0	0	pol	AAA	0	0	0	pol	AAA	0	0	0	pol	ATA	0	0	0	pol	GGG	0	0	0
pol	GTA	0	0	0	pol	CCA	0	0	0	pol	AGT	0	0	0	pol	CAA	0	0	0	pol	GCA	0	0	0	pol	AAA	0	0	0	pol	GTA	0	0	0	pol	GTA	0	0	0	pol	CAA	0	0	0	pol	GCA	0	0	0
pol	GTG	0	0	0	pol	AGA	0	0	0	pol	AGA	0	0	0	pol	GAT	0	0	0	pol	AAG	0	0	0	pol	GTA	0	0	0	pol	GTG	0	0	0	pol	GTG	0	0	0	pol	GAT	0	0	0	pol	GTA	0	0	0
pol	CCA	0	0	0	pol	AGA	0	0	0	pol	CAG	0	0	0	pol	AAT	0	0	0	pol	ATC	0	0	0	pol	GTG	0	0	0	pol	CCA	0	0	0	pol	CCA	0	0	0	pol	AAT	0	0	0	pol	GTA	0	0	0
pol	AGA	0	0	0	pol	AAA	0	0	0	pol	GAT	0	0	0	pol	AGT	0	0	0	pol	ATT	0	0	0	pol	CCA	0	0	0	pol	AGA	0	0	0	pol	AGA	0	0	0	pol	AGT	0	0	0	pol	ATA	0	0	0
pol	AGA	0	0	0	pol	GCA	0	0	0	pol	GAG	0	0	0	pol	GAT	0	0	0	pol	AGG	0	0	0	pol	AGA	0	0	0	pol	AGA	0	0	0	pol	AGG	0	0	0	pol	GAG	0	0	0	pol	CAA	0	0	0
pol	AAA	0	0	0	pol	AAG	0	0	0	pol	GAT	0	0	0	pol	ATA	0	0	0	pol	GAT	0	0	0	pol	AGA	0	0	0	pol	AAA	0	0	0	pol	AAA	0	0	0	pol	ATA	0	0	0	pol	GAT	0	0	0
pol	GCA	0	0	0	pol	ATT	0	0	0	pol	TAA	0	0	0	pol	AAA	0	0	0	pol	TAT	0	0	0	pol	AAA	0	0	0	pol	GTA	0	0	0	pol	GCA	0	0	0	pol	AAA	0	0	0	pol	AAT	0	0	0
pol	AAG	0	0	0	pol	ATT	0	0	0	vif	ATG	0	0	0	pol	GTA	0	0	0	pol	GGA	0	0	0	pol	GCA	0	0	0	pol	AAA	0	0	0	pol	AAG	0	0	0	pol	GTA	0	0	0	pol	AGT	0	0	0
pol	ATC	0	0	0	pol	AGG	0	0	0	vif	GAA	0	0	0	pol	GTG	0	0	0	pol	AAA	0	0	0	pol	AAA	0	0	0	pol	ATC	0	0	0	pol	ATC	0	0	0	pol	GTG	0	0	0	pol	GAC	0	0	0
pol	ATT	0	0	0	pol	GAT	0	0	0	vif	AAC	0	0	0	pol	CCA	0	0	0	pol	CAG	0	0	0	pol	ATC	0	0	0	pol	ATT	0	0	0	pol	ATT	0	0	0	pol	CCA	0	0	0	pol	ATA	0	0	0
pol	AGG	0	0	0	pol	TAT	0	0	0	vif	AGA	0	0	0	pol	AGA	0	0	0	pol	ATG	0	0	0	pol	ATT	0	0	0	pol	AGG	0	0	0	pol	AGG	0	0	0	pol	AGA	0	0	0	pol	AAA	0	0	0
pol	GAT	0	0	0	pol	GGA	0	0	0	vif	TGG	0	0	0	pol	AGA	0	0	0	pol	GCA	0	0	0	pol	AGG	0	0	0	pol	GAT	0	0	0	pol	GAT	0	0	0	pol	AGA	0	0	0	pol	GTA	0	0	0
pol	TAT	0	0	0	pol	AAA	0	0	0	vif	CAG	0	0	0	pol	AAA	0	0	0	pol	GGT	0	0	0	pol	GAT	0	0	0	pol	TAT	0	0	0	pol	TAT	0	0	0	pol	AAA	0	0	0	pol	GTG	0	0	0
pol	GGA	0	0	0	pol	CAG	0	0	0	vif	GTG	0	0	0	pol	GCA	0	0	0	pol	GAT	0	0	0	pol	TAT	0	0	0	pol	GGA	0	0	0	pol	GGA	0	0	0	pol	GCA	0	0	0	pol	CCA	0	0	0
pol	AAA	0	0	0	pol	ATG	0	0	0	vif	ATG	0	0	0	pol	AAA	0	0	0	pol	GAT	0	0	0	pol	GGA	0	0	0	pol	AAA	0	0	0	pol	AAA	0	0	0	pol	AAG	0	0	0	pol	AGA	0	0	0
pol	CAG	0	0	0	pol	GCA	0	0	0	vif	ATT	0	0	0	pol	ATC	0	0	0	pol	TGT	0	0	0	pol	AAA	0	0	0	pol	CAG	0	0	0	pol	CAG	0	0	0	pol	ATC	0	0	0	pol	AGA	0	0	0
pol	ATG	0	0	0	pol	GGC	0	0	0	vif	GTG	0	0	0	pol	ATT	0	0	0	pol	GTG	0	0	0	pol	CAG	0	0	0	pol	ATG	0	0	0	pol	ATG	0	0	0	pol	ATT	0	0	0	pol	AAA	0	0	0
pol	GCA	0	0	0	pol	GAT	0	0	0	vif	TGG	0	0	0	pol	AGG	0	0	0	pol	GCA	0	0	0	pol	ATG	0	0	0	pol	GCA	0	0	0	pol	GCA	0	0	0	pol	AGG	0	0	0	pol	GCA	0	0	0
pol	GGT	0	0	0	pol	GAT	0	0	0	vif	CAA	0	0	0	pol	GAT	0	0	0	pol	AGT	0	0	0	pol	GCA	0	0	0	pol	GGC	0	0	0	pol	GGT	0	0	0	pol	GAT	0	0	0	pol	AAG	0	0	0
pol	GAT	0	0	0	pol	TGT	0	0	0	vif	GTA	0	0	0	pol	TAT	0	0	0	pol	AGA	0	0	0	pol	GGT	0	0	0	pol	GAT	0	0	0	pol	GAT	0	0	0	pol	TAT	0	0	0	pol	ATC	0	0	0
pol	GAT	0	0	0	pol	GTG	0	0	0	vif	GAC	0	0	0	pol	GGA	0	0	0	pol	CAG	0	0	0	pol	GAT	0	0	0	pol	GAT	0	0	0	pol	GAT	0	0	0	pol	GGA	0	0	0	pol	ATT	0	0	0
pol	TGT	0	0	0	pol	GCA	0	0	0	vif	AGG	0	0	0	pol	AAA	0	0	0	pol	GAT	0	0	0	pol	GAT	0	0	0	pol	TGT	0	0	0	pol	TGT	0	0	0	pol	AAA	0	0	0	pol	AGA	0	0	0
pol	GTG	0	0	0	pol	AGT	0	0	0	vif	ATG	0	0	0	pol	CAG	0	0	0	pol	GAG	0	0	0	pol	TGT	0	0	0	pol	GTG	0	0	0	pol	GTG	0	0	0	pol	CAG	0	0	0	pol	GAT	0	0	0
pol	GCA	0	0	0	pol	AGA	0	0	0	vif	AGG	0	0	0	pol	ATG	0	0	0	pol	GAT	0	0	0	pol	GTG	0	0	0	pol	GCA	0	0	0	pol	GCA	0	0	0	pol	ATG	0	0	0	pol	TAT	0	0	0
pol	AGT	0	0	0	pol	CAG	0	0	0	vif	ATT	0	0	0	pol	GCA	0	0	0	pol	TAG	0	0	0	pol	GCA	0	0	0	pol	AGT	0	0	0	pol	AGT	0	0	0	pol	GCA	0	0	0	pol	GGA	0	0	0
pol	AGA	0	0	0	pol	GAT	0	0	0	vif	AAA	0	0	0	pol	GGT	0	0	0	vif	ATG	0	0	0	pol	AGT	0	0	0	pol	AGA	0	0	0	pol	AGA	0	0	0	pol	GGT	0	0	0	pol	AAA	0	0	0
pol	CAG	0	0	0	pol	GAG	0	0	0	vif	ACA	0	0	0	pol	GAT	0	0	0	vif	GAA	0	0	0	pol	AGA	0	0	0	pol	CAG	0	0	0	pol	CAG	0	0	0	pol	GAT	0	0	0	pol	CAG	0	0	0
pol	GAT	0	0	0	pol	GAT	0	0	0	vif	TGG	0	0	0	pol	GAT	0	0	0	vif	AAC	0	0	0	pol	CAG	0	0	0	pol	GAT	0	0	0	pol	GAT	0	0	0	pol	GAT	0	0	0	pol	ATG	0	0	0
pol	GAG	0	0	0	pol	TAA	0	0	0	vif	CAC	0	0	0	pol	TGT	0	0	0	vif	AGA	0	0	0	pol	GAT	0	0	0	pol	GAG	0	0	0	pol	GAG	0	0	0	pol	TGT	0	0	0	pol	GCA	0	0	0
pol	GAT	0	0	0	vif	ATG	0	0	0	vif	AGT	0	0	0	pol	GTG	0	0	0	vif	TGG	0	0	0	pol	GAG	0	0	0	pol	GAT	0	0	0	pol	GAT	0	0	0	pol	ATG	0	0	0	pol	GGT	0	0	0
pol	TAG	0	0	0	vif	GAA	0	0	0	vif	CTA	0	0	0	pol	GCA	0	0	0	vif	CAG	0	0	0	pol	GGT	0	0	0	pol	TAA	0	0	0	pol	TAG	0	0	0	pol	GCA	0	0	0	pol	GAT	0	0	0
vif	ATG	0	0	0	vif	AAC	0	0	0	vif	GTA	0	0	0	pol	AGT	0	0	0	vif	GTG	0	0	0	pol	TAA	0	0	0	vif	ATG	0	0	0	vif	ATG	0	0	0	pol	AGT	0	0	0	pol	GAT	0	0	0
vif	GAA	0	0	0	vif	AGA	0	0	0	vif	AAA	0	0	0	pol	AGA	0	0	0	vif	ATG	0	0	0	vif	ATG	0	0	0	vif	GAA	0	0	0	vif	GAA	0	0	0	pol	AGA	0	0	0	pol	TGT	0	0	0
vif	AAC	0	0	0	vif	TGG	0	0	0	vif	CAC	0	0	0	pol	CAG	0	0	0	vif	ATT	0	0	0	vif	GAA	0	0	0	vif	AAC	0	0	0	vif	AAC	0	0	0	pol	CAG	0	0	0	pol	GTG	0	0	0
vif	AGA	0	0	0	vif	CAG	0	0	0	vif	CAT	0	0	0	pol	GAT	0	0	0	vif	GTG	0	0	0	vif	AAC	0	0	0	vif	AGA	0	0	0	vif	AGA	0	0	0	pol	AAT	0	0	0	pol	GCA	0	0	0
vif	TGG	0	0	0	vif	GCG	0	0	0	vif	ATG	0	0	0	pol	GAA	0	0	0	vif	TGG	0	0	0	vif	AGA	0	0	0	vif	TGG	0	0	0	vif	TGG	0	0	0	pol	GAG	0	0	0	pol	GGT	0	0	0
vif	CAG	0	0	0	vif	ATG	0	0	0	vif	TAT	0	0	0	pol	GAT	0	0	0	vif	CAA	0	0	0	vif	TGG	0	0	0	vif	CAG	0	0	0	vif	CAG	0	0	0	pol	GAT	0	0	0	pol	AGA	0	0	0
vif	GTG	0	0	0	vif	ATT	0	0	0	vif	ATT	0	0	0	pol	TAG	0	0	0	vif	GTA	0	0	0	vif	CAG	0	0	0	vif	GCG	0	0	0	vif	GTG	0	0	0	pol	TAA	0	0	0	pol	CAG	0	0	0
vif	ATG	0	0	0	vif	GTG	0	0	0	vif	TCA	0	0	0	vif	ATG	0	0	0	vif	GAC	0	0	0	vif	GTG	0	0	0	vif	ATG	0	0	0	vif	ATG	0	0	0	vif	ATG	0	0	0	pol	GAT	0	0	0
vif	ATT	0	0	0	vif	TGG	0	0	0	vif	AGG	0	0	0	vif	GAA	0	0	0	vif	AGG	0	0	0	vif	ATG	0	0	0	vif	ATT	0	0	0	vif	ATT	0	0	0	vif	GAA	0	0	0	pol	GAG	0	0	0
vif	GTG	0	0	0	vif	CAA	0	0	0	vif	AAA	0	0	0	vif	AAC	0	0	0	vif	ATG	0	0	0	vif	ATT	0	0	0	vif	GTG	0	0	0	vif	GTG	0	0	0	vif	AAC	0	0	0	pol	GAT	0	0	0
vif	TGG	0	0	0	vif	GTA	0	0	0	vif	GCT	0	0	0	vif	AGA	0	0	0	vif	AGG	0	0	0	vif	GTG	0	0	0	vif	TGG	0	0	0	vif	TGG	0	0	0	vif	AGA	0	0	0	pol	TAG	0	0	0
vif	CAA	0	0	0	vif	GAC	0	0	0	vif	AAG	0	0	0	vif	TGG	0	0	0	vif	ATT	0	0	0	vif	TGG	0	0	0	vif	CAA	0	0	0	vif	CAA	0	0	0	vif	TGG	0	0	0	vif	ATG	0	0	0
vif	GTA	0	0	0	vif	AGG	0	0	0	vif	GGG	0	0	0	vif	CAG	0	0	0	vif	AGA	0	0	0	vif	CAA	0	0	0	vif	GTA	0	0	0	vif	GTA	0	0	0	vif	CAG	0	0	0	vif	GAA	0	0	0
vif	GAC	0	0	0	vif	ATG	0	0	0	vif	TGG	0	0	0	vif	GTG	0	0	0	vif	ACA	0	0	0	vif	GTA	0	0	0	vif	GAC	0	0	0	vif	GAC	0	0	0	vif	GTG	0	0	0	vif	AAC	0	0	0
vif	AGG	0	0	0	vif	AGG	0	0	0	vif	ATT	0	0	0	vif	ATG	0	0	0	vif	TGG	0	1	0	vif	GAC	0	0	0	vif	AGG	0	0	0	vif	AGG	0	0	0	vif	ATG	0	0	0	vif	AGA	0	0	0
vif	ATG	0	0	0	vif	ATT	0	0	0	vif	TAT	0	0	0	vif	ATT	0	0	0	vif	AAA	0	0	0	vif	AGG	0	0	0	vif	ATG	0	0	0	vif	ATG	0	0	0	vif	ATT	0	0	0	vif	TGG	0	0	0
vif	AGG	0	0	0	vif	AAC	0	0	0	vif	AAA	0	0	0	vif	GTG	0	0	0	vif	AGT	0	0	0	vif	ATG	0	0	0	vif	AGG	0	0	0	vif	AGG	0	0	0	vif	GTA	0	0	0	vif	CAG	0	0	0
vif	ATT	0	0	0	vif	ACA	0	0	0	vif	CAT	0	0	0	vif	TGG	0	0	0	vif	ATA	0	0	0	vif	AGG	0	0	0	vif	ATT	0	0	0	vif	ATT	0	0	0	vif	TGG	0	1	0	vif	GTG	0	0	0
vif	AGA	0	0	0	vif	TGG	0	0	0	vif	CAC	0	0	0	vif	CAA	0	0	0	vif	GTG	0	0	0	vif	GTT	0	0	0	vif	AAA	0	0	0	vif	AGA	0	0	0	vif	CAA	0	0	0	vif	ATG	0	0	0
vif	TCA	0	0	0	vif	AAA	0	0	0	vif	TAT	0	0	0	vif	GTA	0	0	0	vif	AAA	0	0	0	vif	AAC	0	0	0	vif	ACA	0	0	0	vif	ACA	0	0	0	vif	GTA	0	0	0	vif	ATT	0	0	0
vif	TGG	0	1	1	vif	AGT	0	0	0	vif	GAA	0	0	0	vif	GAC	0	0	0	vif	TAC	0	0	0	vif	ACA	0	0	0	vif	TGG	0	0	0	vif	TGG	0	0	0	vif	GAC	0	0	0	vif	GTG	0	0	0
vif	AAA	0	0	0	vif	TTA	0	0	0	vif	AAC	0	0	0	vif	AGG	0	0	0	vif	CAT	0	0	0	vif	TGG	0	0	0	vif	AAA	0	0	0	vif	AAA	0	0	0	vif	AGA	0	0	0	vif	TGG	0	0	0
vif	AGT	0	0	0	vif	GTA	0	0	0	vif	ATG	0	0	0	vif	ATG	0	0	0	vif	ATG	0	0	0	vif	AAA	0	0	0	vif	AGT	0	0	0	vif	AGT	0	0	0	vif	ATG	0	0	0	vif	CAG	0	0	0
vif	TTA	0	0	0	vif	AAA	0	0	0	vif	CAT	0	0	0	vif	AAG	0	0	0	vif	TAT	0	0	0	vif	AGT	0	0	0	vif	TTA	0	0	0	vif	TTA	0	0	0	vif	AGG	0	0	0	vif	GTA	0	0	0
vif	GTA	0	0	0	vif	CAC	0	0	0	vif	CCA	0	0	0	vif	ATT	0	0	0	vif	GTT	0	0	0	vif	TTA	0	0	0	vif	GTA	0	0	0	vif	GTA	0	0	0	vif	ATT	0	0	0	vif	GAC	0	0	0
vif	AAA	0	0	0	vif	CAT	0	0	0	vif	AGA	0	0	0	vif	AGA	0	0	0	vif	TCA	0	0	0	vif	GTA	0	0	0	vif	AAA	0	0	0	vif	AAA	0	0	0	vif	AAA	0	0	0	vif	AGG	0	0	0
vif	CAC	0	0	0	vif	ATA	0	0	0	vif	GTA	0	0	0	vif	ACA	0	0	0	vif	GGG	0	0	0	vif	AAA	0	0	0	vif	CAC	0	0	0	vif	CAT	0	0	0	vif	ACA	0	0	0	vif	ATG	0	0	0
vif	CAT	0	0	0	vif	CAT	0	0	0	vif	GGT	0	0	0	vif	TGG	0	0	0	vif	AAA	0	0	0	vif	TAC	0	0	0	vif	CAT	0	0	0	vif	CAT	0	0	0	vif	TGG	0	1	0	vif	AGG	0	0	0
vif	ATG	0	0	0	vif	GTT	0	0	0	vif	TCA	0	0	0	vif	AAT	0	0	0	vif	GCT	0	0	0	vif	CAT	0	0	0	vif	ATA	0	0	0	vif	ATG	0	0	0	vif	AAA	0	0	0	vif	ATT	0	0	0
vif	TAT	0	0	0	vif	TCA	0	0	0	vif	GAA	0	0	0	vif	AGT	0	0	0	vif	AGG	0	0	0	vif	ATG	0	0	0	vif	CAT	0	0	0	vif	CAT	0	0	0	vif	AGT	0	0	0	vif	AGA	0	0	0
vif	GTC	0	0	0	vif	AGG	0	0	0	vif	GTA	0	0	0	vif	TTA	0	0	0	vif	AAA	0	0	0	vif	CAC	0	0	0	vif	GTT	0	0	0	vif	GTT	0	0	0	vif	TTA	0	0	0	vif	ACA	0	0	0
vif	TCA	0	0	0	vif	AAA	0	0	0	vif	CAC	0	0	0	vif	GTA	0	0	0	vif	TGG	0	0	0	vif	AAG	0	0	0	vif	TCA	0	0	0	vif	TCA	0	0	0	vif	GTA	0	0	0	vif	TGG	0	4	0
vif	AGG	0	0	0	vif	GCT	0	0	0	vif	ATC	0	0	0	vif	AAA	0	0	0	vif	TCT	0	0	0	vif	TCA	0	0	0	vif	AAG	0	0	0	vif	GGG	0	0	0	vif	AAA	0	0	0	vif	AAG	0	0	0
vif	AAA	0	0	0	vif	AAG	0	0	0	vif	CCA	0	0	0	vif	CAT	0	0	0	vif	TAT	0	0	0	vif	AAG	0	0	0	vif	AAA	0	0	0	vif	AAA	0	0	0	vif	CAC	0	0	0	vif	AGT	0	0	0
vif	GCT	0	0	0	vif	AAA	0	0	0	vif	CTA	0	0	0	vif	CAT	0	0	0	vif	AGA	0	0	0	vif	AAA	0	0	0	vif	GCT	0	0	0	vif	GCT	0	0	0	vif	CAT	0	0	0	vif	TTA	0	0	0
vif	AGG	0	0	0	vif	TGG	0	1	0	vif	GGG	0	0	0	vif	ATG	0	0	0	vif	CAT	0	0	0	vif	GCT	0	0	0	vif	AAG	0	0	0	vif	AAG	0	0	0	vif	ATA	0	0	0	vif	GTA	0	0	0
vif	GGA	0	0	0	vif	GTT	0	0	0	vif	GAT	0	0	0	vif	TAC	0	0	0	vif	CAC	0	0	0	vif	AAA	0	0	0	vif	AAA	0	0	0	vif	AAA	0	0	0	vif	TAT	0	0	0	vif	AAA	0	0	0
vif	TGG	0	1	0	vif	TAT	0	0	0	vif	GCT	0	0	0	vif	ATT	0	0	0	vif	TAT	0	0	0	vif	GAA	0	0	0	vif	TGG	0	1	0	vif	TGG	0	0	0	vif	ATC	0	0	0	vif	CAT	0	0	0
vif	TTT	0	0	0	vif	AAA	0	0	0	vif	AAA	0	0	0	vif	TCA	0	0	0	vif	GAA	0	0	0	vif	TGG	0	0	0	vif	GTT	0	0	0	vif	TTG	0	0	0	vif	TCA	0	0	0	vif	CAT	0	0	0
vif	TAT	0	0	0	vif	CAT	0	0	0	vif	TTG	0	0	0	vif	AAG	0	0	0	vif	AGC	0	0	0	vif	TCT	0	0	0	vif	TAT	0	0	0	vif	TAT	0	0	0	vif	AGG	0	0	0	vif	ATG	0	0	0
vif	AGG	0	0	0	vif	CAC	0	0	0	vif	GTA	0	0	0	vif	AAA	0	0	0	vif	CGT	0	0	0	vif	TAT	0	0	0	vif	AGA	0	0	0	vif	AAA	0	0	0	vif	AAA	0	0	0	vif	TAT	0	0	0
vif	CAT	0	0	0	vif	TAT	0	0	0	vif	ATC	0	0	0	vif	GCT	0	0	0	vif	CAT	0	0	0	vif	AGA	0	0	0	vif	CAT	0	0	0	vif	CAT	0	0	0	vif	GCT	0	0	0	vif	AAG	0	0	0
vif	CAC	0	0	0	vif	CAA	0	0	0	vif	ATG	0	0	0	vif	AGA	0	0	0	vif	CCA	0	0	0	vif	CAT	0	0	0	vif	CAC	0	0	0	vif	CAC	0	0	0	vif	AAG	0	0	0	vif	TCA	0	0	0
vif	TAT	0	0	0	vif	AAC	0	0	0	vif	ACA	0	0	0	vif	GGA	0	0	0	vif	AGA	0	0	0	vif	CAC	0	0	0	vif	TAT	0	0	0	vif	TAT	0	0	0	vif	GGA	0	0	0	vif	GGG	0	0	0
vif	GAA	0	0	0	vif	AAT	0	0	0	vif	TAT	0	0	0	vif	TGG	0	0	0	vif	ATA	0	0	0	vif	TAT	0	0	0	vif	GAA	0	0	0	vif	GAA	0	0	0	vif	TGG	0	1	0	vif	AAA	0	0	0
vif	AGC	0	0	0	vif	CAT	0	0	0	vif	TGG	0	0	0	vif	TTT	0	0	0	vif	AGT	0	0	0	vif	GAA	0	0	0	vif	AGC	0	0	0	vif	AGC	0	0	0	vif	TAT	0	0	0	vif	GCT	0	0	0
vif	ACT	0	0	0	vif	CCA	0	0	0	vif	GGT	0	0	0	vif	TAT	0	0	0	vif	TCA	0	0	0	vif	AGC	0	0	0	vif	ATT	0	0	0	vif	ATT	0	0	0	vif	TAT	0	0	0	vif	AGG	0	0	0
vif	AAT	0	0	0	vif	AGA	0	0	0	vif	CTG	0	0	0	vif	AGG	0	0	0	vif	GAA	0	0	0	vif	TCT	0	0	0	vif	AAT	0	0	0	vif	AAT	0	0	0	vif	AGA	0	0	0	vif	AAA	0	0	0
vif	CCA	0	0	0	vif	ATA	0	0	0	vif	CAT	0	0	0	vif	CAT	0	0	0	vif	GTA	0	0	0	vif	AAT	0	0	0	vif	CCA	0	0	0	vif	CCA	0	0	0	vif	CAT	0	0	0	vif	TGG	0	5	0
vif	AGA	0	0	0	vif	AGT	0	0	0	vif	ACA	0	0	0	vif	CAC	0	0	0	vif	CAC	0	0	0	vif	CCA	0	0	0	vif	AAA	0	0	0	vif	AGA	0	0	0	vif	CAC	0	0	0	vif	TAT	0	0	0
vif	ATA	0	0	0	vif	TCA	0	0	0	vif	GGA	0	0	0	vif	TAT	0	0	0	vif	ATC	0	0	0	vif	AGA	0	0	0	vif	ATA	0	0	0	vif	AAA	0	0	0	vif	TAT	0	0	0	vif	TAT	0	0	0
vif	AGT	0	0	0	vif	GAA	0	0	0	vif	GAA	0	0	0	vif	GAA	0	0	0	vif	CCA	0	0	0	vif	ATA	0	0	0	vif	AGT	0	0	0	vif	AGT	0	0	0	vif	GAA	0	0	0	vif	AGA	0	0	0
vif	TCA	0	0	0	vif	GTA	0	0	0	vif	AGA	0	0	0	vif	AGT	0	0	0	vif	CTA	0	0	0	vif	AGT	0	0	0	vif	TCA	0	0	0	vif	TCA	0	0	0	vif	AGC	0	0	0	vif	CAT	0	0	0
vif	GAA	0	0	0	vif	CAC	0	0	0	vif	GAC	0	0	0	vif	CCT	0	0	0	vif	GGG	0	0	0	vif	TCA	0	0	0	vif	GAA	0	0	0	vif	GAA	0	0	0	vif	ACT	0	0	0	vif	CAC	0	0	0
vif	GTA	0	0	0	vif	ATC	0	0	0	vif	TGG	0	0	0	vif	CAT	0	0	0	vif	GAT	0	0	0	vif	GAA	0	0	0	vif	GTA	0	0	0	vif	GTA	0	0	0	vif	CAT	0	0	0	vif	TAT	0	0	0
vif	CAC	0	0	0	vif	CCA	0	0	0	vif	CAT	0	0	0	vif	CCA	0	0	0	vif	GCT	0	0	0	vif	GTA	0	0	0	vif	CAC	0	0	0	vif	CAC	0	0	0	vif	CCA	0	0	0	vif	GAA	0	0	0
vif	ATC	0	0	0	vif	TTA	0	0	0	vif	TTG	0	0	0	vif	AAG	0	0	0	vif	AGT	0	0	0	vif	CAC	0	0	0	vif	ATC	0	0	0	vif	ATT	0	0	0	vif	AGA	0	0	0	vif	AGT	0	0	0
vif	CCA	0	0	0	vif	GGG	0	0	0	vif	GGC	0	0	0	vif	ATA	0	0	0	vif	TTG	0	0	0	vif	ATC	0	0	0	vif	CCA	0	0	0	vif	CCA	0	0	0	vif	ATA	0	0	0	vif	ACC	0	0	0
vif	CTA	0	0	0	vif	GAA	0	0	0	vif	CAG	0	0	0	vif	AGT	0	0	0	vif	GTA	0	0	0	vif	CCA	0	0	0	vif	CTA	0	0	0	vif	CTA	0	0	0	vif	AGT	0	0	0	vif	CAT	0	0	0
vif	GGA	0	0	0	vif	ACT	0	0	0	vif	GGA	0	0	0	vif	TCA	0	0	0	vif	ATA	0	0	0	vif	CTA	0	0	0	vif	GGG	0	0	0	vif	GGG	0	0	0	vif	TCA	0	0	0	vif	CCA	0	0	0
vif	GAT	0	0	0	vif	AAA	0	0	0	vif	GTC	0	0	0	vif	GAA	0	0	0	vif	ACA	0	0	0	vif	GGG	0	0	0	vif	GAT	0	0	0	vif	GAT	0	0	0	vif	GAA	0	0	0	vif	AGA	0	0	0
vif	GCT	0	0	0	vif	TTG	0	0	0	vif	TCC	0	0	0	vif	GTA	0	0	0	vif	ACA	0	0	0	vif	GAA	0	0	0	vif	GAT	0	0	0	vif	GCT	0	0	0	vif	GTA	0	0	0	vif	ATA	0	0	0
vif	AGA	0	0	0	vif	GTA	0	0	0	vif	GTA	0	0	0	vif	CAC	0	0	0	vif	TAT	0	0	0	vif	GCT	0	0	0	vif	ACA	0	0	0	vif	CGT	0	0	0	vif	CAC	0	0	0	vif	AGT	0	0	0
vif	TTA	0	0	0	vif	GTA	0	0	0	vif	GAA	0	0	0	vif	ATC	0	0	0	vif	TGG	0	3	3	vif	AGA	0	0	0	vif	TTA	0	0	0	vif	TTA	0	0	0	vif	ATC	0	0	0	vif	TCA	0	0	0
vif	GTA	0	0	0	vif	ACA	0	0	0	vif	TGG	0	0	0	vif	CCA	0	0	0	vif	GGT	0	0	0	vif	CTG	0	0	0	vif	GTA	0	0	0	vif	GTA	0	0	0	vif	CCA	0	0	0	vif	GAA	0	0	0
vif	ATA	0	0	0	vif	ACA	0	0	0	vif	AGA	0	0	0	vif	CTA	0	0	0	vif	CTG	0	0	0	vif	GTA	0	0	0	vif	GTA	0	0	0	vif	ATA	0	0	0	vif	CTA	0	0	0	vif	GTA	0	0	0
vif	ACA	0	0	0	vif	TAT	0	0	0	vif	AAA	0	0	0	vif	GGG	0	0	0	vif	CAT	0	0	0	vif	ATC	0	0	0	vif	ACA	0	0	0	vif	ACA	0	0	0	vif	GGG	0	0	0	vif	CAC	0	0	0
vif	ACA	0	0	0	vif	TGG	0	1	0	vif	GAG	0	0	0	vif	GAG	0	0	0	vif	ACA	0	0	0	vif	ACA	0	0	0	vif	ACA	0	0	0	vif	ACA	0	0	0	vif	GAT	0	0	0	vif	ATC	0	0	0
vif	TAT	0	0	0	vif	GGT	0	0	0	vif	AGA	0	0	0	vif	GCT	0	0	0	vif	GGA	0	0	0	vif	ACA	0	0	0	vif	TAT	0	0	0	vif	TAT	0	0	0	vif	GCT	0	0	0	vif	CCA	0	0	0
vif	TGG	1	0	1	vif	CTG	0	0	0	vif	TAT	0	0	0	vif	AAA	0	0	0	vif	GAA	0	0	0	vif	TAT	0	0	0	vif	TGG	0	0	0	vif	TGG	1	0	1	vif	AAA	0	0	0	vif	TTA	0	0	0
vif	GGT	0	0	0	vif	CAT	0	0	0	vif	AGC	0	0	0	vif	TTG	0	0	0	vif	AGA	0	0	0	vif	TGG	0	0	0	vif	GGT	0	0	0	vif	GGT	0	0	0	vif	TTG	0	0	0	vif	GAG	0	0	0
vif	CTA	0	0	0	vif	ACA	0	0	0	vif	ACA	0	0	0	vif	GTA	0	0	0	vif	GAT	0	0	0	vif	GGT	0	0	0	vif	CTG	0	0	0	vif	CTG	0	0	0	vif	GTA	0	0	0	vif	GAT	0	0	0
vif	CAT	0	0	0	vif	GGA	0	0	0	vif	CAA	0	0	0	vif	GTA	0	0	0	vif	TGG	0	0	0	vif	CTG	0	0	0	vif	AAC	0	0	0	vif	CAT	0	0	0	vif	GTA	0	0	0	vif	GGG	0	0	0
vif	ACA	0	0	0	vif	GAA	0	0	0	vif	GTA	0	0	0	vif	ACA	0	0	0	vif	CAT	0	0	0	vif	AAT	0	0	0	vif	ACA	0	0	0	vif	ACA	0	0	0	vif	ACA	0	0	0	vif	AAA	0	0	0
vif	GGA	0	0	0	vif	CGA	0	0	0	vif	GAT	0	0	0	vif	ACA	0	0	0	vif	TTG	0	0	0	vif	ACA	0	0	0	vif	GGA	0	0	0	vif	GGA	0	0	0	vif	ACA	0	0	0	vif	CTA	0	0	0
vif	GAA	0	0	0	vif	GAC	0	0	0	vif	CCT	0	0	0	vif	TAT	0	0	0	vif	GGT	0	0	0	vif	GGA	0	0	0	vif	GAA	0	0	0	vif	GAA	0	0	0	vif	TAC	0	0	0	vif	GTA	0	0	0
vif	AGA	0	0	0	vif	TGG	0	0	0	vif	GGC	0	0	0	vif	TGG	0	0	0	vif	CAG	0	0	0	vif	GAA	0	0	0	vif	AGA	0	0	0	vif	AGA	0	0	0	vif	TGG	2	1	0	vif	ATA	0	0	0
vif	GAC	0	0	0	vif	CAT	0	0	0	vif	CTA	0	0	0	vif	GGT	0	0	0	vif	GGA	0	0	0	vif	AGA	0	0	0	vif	GAA	0	0	0	vif	GAC	0	0	0	vif	GGT	0	0	0	vif	ACA	0	0	0
vif	TGG	0	0	0	vif	TTG	0	0	0	vif	GCA	0	0	0	vif	CTG	0	0	0	vif	GTC	0	0	0	vif	GAA	0	0	0	vif	TGG	0	0	0	vif	TGG	0	0	0	vif	CTG	0	0	0	vif	ACA	0	0	0
vif	CAT	0	0	0	vif	GGC	0	0	0	vif	GAC	0	0	0	vif	AAT	0	0	0	vif	TCC	0	0	0	vif	TGG	0	0	0	vif	CAT	0	0	0	vif	CAT	0	0	0	vif	CTT	0	0	0	vif	TAT	0	0	0
vif	TTG	0	0	0	vif	CAG	0	0	0	vif	CAA	0	0	0	vif	ACA	0	0	0	vif	ATG	0	0	0	vif	CAT	0	0	0	vif	TTG	0	0	0	vif	TTG	0	0	0	vif	ACA	0	0	0	vif	TGG	3	0	0
vif	GGT	0	0	0	vif	GGT	0	0	0	vif	CTA	0	0	0	vif	GGA	0	0	0	vif	GAA	0	0	0	vif	TTG	0	0	0	vif	GGC	0	0	0	vif	GGC	0	0	0	vif	GGA	0	0	0	vif	GGT	0	0	0
vif	CAG	0	0	0	vif	GTC	0	0	0	vif	ATT	0	0	0	vif	GAA	0	0	0	vif	TGG	0	0	0	vif	GGT	0	0	0	vif	CAG	0	0	0	vif	CAG	0	0	0	vif	GAA	0	0	0	vif	CTA	0	0	0
vif	GGA	0	0	0	vif	TCC	0	0	0	vif	CAC	0	0	0	vif	AGA	0	0	0	vif	AGG	0	0	0	vif	CAG	0	0	0	vif	GGA	0	0	0	vif	GGG	0	0	0	vif	AGA	0	0	0	vif	CAT	0	0	0
vif	GTC	0	0	0	vif	ATA	0	0	0	vif	ATG	0	0	0	vif	GAC	0	0	0	vif	AAA	0	0	0	vif	GGA	0	0	0	vif	GTC	0	0	0	vif	GTC	0	0	0	vif	GAA	0	0	0	vif	ACA	0	0	0
vif	TCC	0	0	0	vif	GAA	0	0	0	vif	TAT	0	0	0	vif	TGG	0	0	0	vif	AGG	0	0	0	vif	GTC	0	0	0	vif	TCC	0	0	0	vif	TCC	0	0	0	vif	TGG	0	0	0	vif	GGA	0	0	0
vif	ATA	0	0	0	vif	TGG	0	1	0	vif	TAT	0	0	0	vif	CAT	0	0	0	vif	AGA	0	0	0	vif	TCC	0	0	0	vif	ATA	0	0	0	vif	ATA	0	0	0	vif	CAT	0	0	0	vif	GAA	0	0	0
vif	GAA	0	0	0	vif	AGG	0	0	0	vif	TTT	0	0	0	vif	TTG	0	0	0	vif	TAT	0	0	0	vif	ATA	0	0	0	vif	GAG	0	0	0	vif	GAA	0	0	0	vif	TTG	0	0	0	vif	AGA	0	0	0
vif	TGG	0	0	0	vif	AAA	0	0	0	vif	GAT	0	0	0	vif	GGT	0	0	0	vif	AGC	0	0	0	vif	GAA	0	0	0	vif	TGG	0	0	0	vif	TGG	0	0	0	vif	GGC	0	0	0	vif	GAC	0	0	0
vif	AGA	0	0	0	vif	GAG	0	0	0	vif	TGT	0	0	0	vif	CAA	0	0	0	vif	ACA	0	0	0	vif	TGG	0	0	0	vif	AGG	0	0	0	vif	AGG	0	0	0	vif	CAG	0	0	0	vif	TGG	0	0	0
vif	AAA	0	0	0	vif	AGA	0	0	0	vif	TTT	0	0	0	vif	GGA	0	0	0	vif	CAA	0	0	0	vif	AGG	0	0	0	vif	AAA	0	0	0	vif	AAA	0	0	0	vif	GGT	0	0	0	vif	CAT	0	0	0
vif	AGG	0	0	0	vif	TAT	0	0	0	vif	TCA	0	0	0	vif	GTC	0	0	0	vif	GTA	0	0	0	vif	CAA	0	0	0	vif	AGG	0	0	0	vif	GAG	0	0	0	vif	GTC	0	0	0	vif	TTG	0	0	0
vif	AGA	0	0	0	vif	AGC	0	0	0	vif	GAA	0	0	0	vif	GCC	0	0	0	vif	GAC	0	0	0	vif	AGG	0	0	0	vif	AGA	0	0	0	vif	AGA	0	0	0	vif	TCC	0	0	0	vif	GGT	0	0	0
vif	TAT	0	0	0	vif	ACA	0	0	0	vif	TCT	0	0	0	vif	ATA	0	0	0	vif	CCT	0	0	0	vif	AGA	0	0	0	vif	TAT	0	0	0	vif	TAT	0	0	0	vif	ATA	0	0	0	vif	CAG	0	0	0
vif	AGC	0	0	0	vif	CAA	0	0	0	vif	GCT	0	0	0	vif	GAA	0	0	0	vif	GAC	0	0	0	vif	TAT	0	0	0	vif	AGA	0	0	0	vif	AGA	0	0	0	vif	GAA	0	0	0	vif	GGA	0	0	0
vif	ACA	0	0	0	vif	GTA	0	0	0	vif	ATA	0	0	0	vif	TGG	0	0	0	vif	CTA	0	0	0	vif	AGC	0	0	0	vif	ACA	0	0	0	vif	ACA	0	0	0	vif	TGG	0	0	0	vif	GTC	0	0	0
vif	CAA	0	0	0	vif	GAC	0	0	0	vif	AGG	0	0	0	vif	AGG	0	0	0	vif	GCA	0	0	0	vif	ACA	0	0	0	vif	CAA	0	0	0	vif	CAA	0	0	0	vif	AGG	0	0	0	vif	TCC	0	0	0
vif	GTA	0	0	0	vif	CCT	0	0	0	vif	AAT	0	0	0	vif	AAA	0	0	0	vif	GAC	0	0	0	vif	CAA	0	0	0	vif	GTA	0	0	0	vif	GTA	0	0	0	vif	AAA	0	0	0	vif	ATA	0	0	0
vif	GAC	0	0	0	vif	AAC	0	0	0	vif	GCC	0	0	0	vif	AGA	0	0	0	vif	CAA	0	0	0	vif	GTA	0	0	0	vif	GAC	0	0	0	vif	ACC	0	0	0	vif	AGG	0	0	0	vif	GAA	0	0	0
vif	CCT	0	0	0	vif	CTA	0	0	0	vif	ATA	0	0	0	vif	AAA	0	0	0	vif	CTA	0	0	0	vif	GAC	0	0	0	vif	CCT	0	0	0	vif	CCT	0	0	0	vif	AGA	0	0	0	vif	TGG	0	2	0
vif	AAC	0	0	0	vif	GCA	0	0	0	vif	TTA	0	0	0	vif	TAT	0	0	0	vif	ATT	0	0	0	vif	CCT	0	0	0	vif	GAC	0	0	0	vif	GAC	0	0	0	vif	TAT	0	0	0	vif	AGG	0	0	0
vif	CTA	0	0	0	vif	GAC	0	0	0	vif	GGA	0	0	0	vif	AGC	0	0	0	vif	CAC	0	0	0	vif	AAT	0	0	0	vif	CTA	0	0	0	vif	ATG	0	0	0	vif	AGC	0	0	0	vif	GAA	0	0	0
vif	GCA	0	0	0	vif	CAA	0	0	0	vif	CAT	0	0	0	vif	ACA	0	0	0	vif	CTG	0	0	0	vif	GGA	0	0	0	vif	GCA	0	0	0	vif	GCA	0	0	0	vif	ACA	0	0	0	vif	AGG	0	0	0
vif	GAC	0	0	0	vif	CTA	0	0	0	vif	ATA	0	0	0	vif	CAA	0	0	0	vif	TAT	0	0	0	vif	GCA	0	0	0	vif	GAC	0	0	0	vif	GAC	0	0	0	vif	CAA	0	0	0	vif	CGT	0	0	0
vif	CAA	0	0	0	vif	ATT	0	0	0	vif	GTT	0	0	0	vif	GTA	0	0	0	vif	TAC	0	0	0	vif	GAC	0	0	0	vif	CAA	0	0	0	vif	CAA	0	0	0	vif	GTA	0	0	0	vif	TAT	0	0	0
vif	CTA	0	0	0	vif	CAT	0	0	0	vif	AGC	0	0	0	vif	GAC	0	0	0	vif	TTT	0	0	0	vif	CAA	0	0	0	vif	CTA	0	0	0	vif	TTA	0	0	0	vif	GAC	0	0	0	vif	AGT	0	0	0
vif	ATT	0	0	0	vif	TCA	0	0	0	vif	CCT	0	0	0	vif	CCT	0	0	0	vif	GAT	0	0	0	vif	CTA	0	0	0	vif	ATT	0	0	0	vif	ATT	0	0	0	vif	CCT	0	0	0	vif	ACA	0	0	0
vif	CAC	0	0	0	vif	TAT	0	0	0	vif	AGG	0	0	0	vif	GAC	0	0	0	vif	TGT	0	0	0	vif	ATT	0	0	0	vif	CAT	0	0	0	vif	CAT	0	0	0	vif	GGC	0	0	0	vif	CAA	0	0	0
vif	CTG	0	0	0	vif	TAT	0	0	0	vif	TGT	0	0	0	vif	CTA	0	0	0	vif	TTT	0	0	0	vif	CAT	0	0	0	vif	CTG	0	0	0	vif	ATG	0	0	0	vif	CTA	0	0	0	vif	GTA	0	0	0
vif	TAT	0	0	0	vif	TTT	0	0	0	vif	GAA	0	0	0	vif	GCA	0	0	0	vif	TCA	0	0	0	vif	CTG	0	0	0	vif	TAT	0	0	0	vif	TAT	0	0	0	vif	GCA	0	0	0	vif	GAC	0	0	0
vif	TAC	0	0	0	vif	GAT	0	0	0	vif	TAT	0	0	0	vif	GAC	0	0	0	vif	GAC	0	0	0	vif	TAT	0	0	0	vif	TAT	0	0	0	vif	TAT	0	0	0	vif	GAC	0	0	0	vif	CCT	0	0	0
vif	TTT	0	0	0	vif	TGT	0	0	0	vif	CAA	0	0	0	vif	CAA	0	0	0	vif	TCT	0	0	0	vif	TAC	0	0	0	vif	TTT	0	0	0	vif	TTT	0	0	0	vif	CAA	0	0	0	vif	AAC	0	0	0
vif	GAT	0	0	0	vif	TTT	0	0	0	vif	GCA	0	0	0	vif	TTA	0	0	0	vif	GCT	0	0	0	vif	TTT	0	0	0	vif	GAT	0	0	0	vif	GAT	0	0	0	vif	CTA	0	0	0	vif	CTA	0	0	0
vif	TGT	0	0	0	vif	TCA	0	0	0	vif	GGA	0	0	0	vif	ATT	0	0	0	vif	ATA	0	0	0	vif	GAT	0	0	0	vif	TGT	0	0	0	vif	TGT	0	0	0	vif	ATT	0	0	0	vif	GCA	0	0	0
vif	TTT	0	0	0	vif	GAA	0	0	0	vif	CAT	0	0	0	vif	CAT	0	0	0	vif	AGA	0	0	0	vif	TGT	0	0	0	vif	TTT	0	0	0	vif	TTT	0	0	0	vif	CAT	0	0	0	vif	GAC	0	0	0
vif	TCA	0	0	0	vif	TCT	0	0	0	vif	AGC	0	0	0	vif	TTG	0	0	0	vif	AAA	0	0	0	vif	TTT	0	0	0	vif	TCA	0	0	0	vif	TCA	0	0	0	vif	CTG	0	0	0	vif	CAA	0	0	0
vif	GAA	0	0	0	vif	GCC	0	0	0	vif	AAG	0	0	0	vif	TAT	0	0	0	vif	GCC	0	0	0	vif	TCA	0	0	0	vif	GAA	0	0	0	vif	GAC	0	0	0	vif	TAT	0	0	0	vif	TTA	0	0	0
vif	TCT	0	0	0	vif	ATA	0	0	0	vif	GTA	0	0	0	vif	TAC	0	0	0	vif	CTA	0	0	0	vif	GAA	0	0	0	vif	TCT	0	0	0	vif	TCT	0	0	0	vif	TAT	0	0	0	vif	ATT	0	0	0
vif	GCT	0	0	0	vif	AGA	0	0	0	vif	GGA	0	0	0	vif	TTT	0	0	0	vif	TTA	0	0	0	vif	TCT	0	0	0	vif	GCT	0	0	0	vif	GCT	0	0	0	vif	TTT	0	0	0	vif	CAT	0	0	0
vif	ATA	0	0	0	vif	AAA	0	0	0	vif	TCT	0	0	0	vif	GAT	0	0	0	vif	GGA	0	0	0	vif	GCT	0	0	0	vif	ATA	0	0	0	vif	ATA	0	0	0	vif	GAT	0	0	0	vif	CTA	0	0	0
vif	AGA	0	0	0	vif	GCC	0	0	0	vif	CTA	0	0	0	vif	TGT	0	0	0	vif	CAT	0	0	0	vif	ATA	0	0	0	vif	AGA	0	0	0	vif	AGA	0	0	0	vif	TGT	0	0	0	vif	CAT	0	0	0
vif	CAT	0	0	0	vif	ATA	0	0	0	vif	CAA	0	0	0	vif	TTT	0	0	0	vif	ATA	0	0	0	vif	AGA	0	0	0	vif	CAT	0	0	0	vif	AAT	0	0	0	vif	TTT	0	0	0	vif	TAC	0	0	0
vif	GCC	0	0	0	vif	CTA	0	0	0	vif	TAC	0	0	0	vif	TCA	0	0	0	vif	GTT	0	0	0	vif	AAA	0	0	0	vif	GCC	0	0	0	vif	GCC	0	0	0	vif	TCA	0	0	0	vif	TTT	0	0	0
vif	ATA	0	0	0	vif	GGA	0	0	0	vif	TTG	0	0	0	vif	GAA	0	0	0	vif	AGC	0	0	0	vif	GCC	0	0	0	vif	ATA	0	0	0	vif	ATA	0	0	0	vif	GAA	0	0	0	vif	GAT	0	0	0
vif	TTA	0	0	0	vif	CAT	0	0	0	vif	GCA	0	0	0	vif	TCT	0	0	0	vif	CCT	0	0	0	vif	ATA	0	0	0	vif	TTA	0	0	0	vif	TTA	0	0	0	vif	TCT	0	0	0	vif	TGT	0	0	0
vif	GGA	0	0	0	vif	ATA	0	0	0	vif	CTA	0	0	0	vif	GCT	0	0	0	vif	AGG	0	0	0	vif	TTA	0	0	0	vif	GGA	0	0	0	vif	GGA	0	0	0	vif	GCT	0	0	0	vif	TTT	0	0	0
vif	CGT	0	0	0	vif	GTT	0	0	0	vif	ACA	0	0	0	vif	ATA	0	0	0	vif	TGT	0	0	0	vif	GGA	0	0	0	vif	TAT	0	0	0	vif	TAT	0	0	0	vif	ATA	0	0	0	vif	TCA	0	0	0
vif	ATA	0	0	0	vif	AGG	0	0	0	vif	GCA	0	0	0	vif	AGG	0	0	0	vif	GAA	0	0	0	vif	CAT	0	0	0	vif	AGA	0	0	0	vif	AGA	0	0	0	vif	AGA	0	0	0	vif	GAA	0	0	0
vif	GTT	0	0	0	vif	CCT	0	0	0	vif	TTA	0	0	0	vif	AAT	0	0	0	vif	TAT	0	0	0	vif	AGA	0	0	0	vif	GTT	0	0	0	vif	GTT	0	0	0	vif	AAT	0	0	0	vif	TCT	0	0	0
vif	AGT	0	0	0	vif	AGT	0	0	0	vif	ATA	0	0	0	vif	GCC	0	0	0	vif	CCA	0	0	0	vif	GTT	0	0	0	vif	AGC	0	0	0	vif	AGC	0	0	0	vif	GCC	0	0	0	vif	GCT	0	0	0
vif	CCT	0	0	0	vif	TGT	0	0	0	vif	AAA	0	0	0	vif	ATA	0	0	0	vif	GCA	0	0	0	vif	AGT	0	0	0	vif	CCT	0	0	0	vif	CCT	0	0	0	vif	ATA	0	0	0	vif	ATA	0	0	0
vif	AGG	0	0	0	vif	GAA	0	0	0	vif	CCA	0	0	0	vif	TTA	0	0	0	vif	GGA	0	0	0	vif	CCT	0	0	0	vif	AGG	0	0	0	vif	AGG	0	0	0	vif	TTA	0	0	0	vif	AGA	0	0	0
vif	TGT	0	0	0	vif	TAT	0	0	0	vif	AAA	0	0	0	vif	GGA	0	0	0	vif	CAT	0	0	0	vif	AGT	0	0	0	vif	TGT	0	0	0	vif	TGT	0	0	0	vif	GGA	0	0	0	vif	AAT	0	0	0
vif	GAA	0	0	0	vif	CTG	0	0	0	vif	AAG	0	0	0	vif	TAT	0	0	0	vif	AAC	0	0	0	vif	TGT	0	0	0	vif	GAA	0	0	0	vif	GAA	0	0	0	vif	CGT	0	0	0	vif	GCC	0	0	0
vif	TAT	0	0	0	vif	GCA	0	0	0	vif	AGA	0	0	0	vif	AGA	0	0	0	vif	AAG	0	0	0	vif	GAA	0	0	0	vif	TTT	0	0	0	vif	TAT	0	0	0	vif	ATA	0	0	0	vif	ATA	0	0	0
vif	CAA	0	0	0	vif	GGA	0	0	0	vif	AAG	0	0	0	vif	GTT	0	0	0	vif	GTA	0	0	0	vif	TAT	0	0	0	vif	CAA	0	0	0	vif	CAA	0	0	0	vif	GTT	0	0	0	vif	TTA	0	0	0
vif	GCA	0	0	0	vif	CAT	0	0	0	vif	CCA	0	0	0	vif	AGC	0	0	0	vif	GGA	0	0	0	vif	CAA	0	0	0	vif	GCA	0	0	0	vif	GCA	0	0	0	vif	AGC	0	0	0	vif	GGA	0	0	0
vif	GGA	0	0	0	vif	AAC	0	0	0	vif	CCT	0	0	0	vif	CCT	0	0	0	vif	TCA	0	0	0	vif	GCA	0	0	0	vif	GGA	0	0	0	vif	GGA	0	0	0	vif	CCT	0	0	0	vif	CGT	0	0	0
vif	CAT	0	0	0	vif	AAG	0	0	0	vif	CTG	0	0	0	vif	AGG	0	0	0	vif	TTA	0	0	0	vif	GGA	0	0	0	vif	CAT	0	0	0	vif	CAT	0	0	0	vif	AGT	0	0	0	vif	ATA	0	0	0
vif	AAC	0	0	0	vif	GTA	0	0	0	vif	CCT	0	0	0	vif	TGT	0	0	0	vif	CAG	0	0	0	vif	CAT	0	0	0	vif	AAT	0	0	0	vif	AGT	0	0	0	vif	TGT	0	0	0	vif	GTT	0	0	0
vif	AAG	0	0	0	vif	GGA	0	0	0	vif	AGT	0	0	0	vif	GAA	0	0	0	vif	TAC	0	0	0	vif	AAC	0	0	0	vif	AAG	0	0	0	vif	AAG	0	0	0	vif	GAA	0	0	0	vif	AGA	0	0	0
vif	GTA	0	0	0	vif	TCT	0	0	0	vif	GTA	0	0	0	vif	TAT	0	0	0	vif	TTG	0	0	0	vif	AAG	0	0	0	vif	GTA	0	0	0	vif	GTA	0	0	0	vif	TAT	0	0	0	vif	CCC	0	0	0
vif	GGA	0	0	0	vif	TTG	0	0	0	vif	GCA	0	0	0	vif	CAA	0	0	0	vif	GCA	0	0	0	vif	GTA	0	0	0	vif	GGA	0	0	0	vif	GGA	0	0	0	vif	CAA	0	0	0	vif	AGG	0	0	0
vif	TCT	0	0	0	vif	CAG	0	0	0	vif	AAA	0	0	0	vif	GCA	0	0	0	vif	CTA	0	0	0	vif	GGA	0	0	0	vif	TCC	0	0	0	vif	TCC	0	0	0	vif	GCA	0	0	0	vif	TGT	0	0	0
vif	CTA	0	0	0	vif	TAC	0	0	0	vif	CTG	0	0	0	vif	GGA	0	0	0	vif	GCA	0	0	0	vif	TCT	0	0	0	vif	TTA	0	0	0	vif	CTA	0	0	0	vif	GGA	0	0	0	vif	GAA	0	0	0
vif	CAG	0	0	0	vif	TTG	0	0	0	vif	ACA	0	0	0	vif	CAT	0	0	0	vif	GCA	0	0	0	vif	CTA	0	0	0	vif	CAG	0	0	0	vif	CAA	0	0	0	vif	CAT	0	0	0	vif	TAT	0	0	0
vif	TAC	0	0	0	vif	GCA	0	0	0	vif	GAG	0	0	0	vif	AAT	0	0	0	vif	TTA	0	0	0	vif	CAG	0	0	0	vif	TAC	0	0	0	vif	TAC	0	0	0	vif	AAC	0	0	0	vif	CAA	0	0	0
vif	TTG	0	0	0	vif	CTA	0	0	0	vif	GAT	0	0	0	vif	CAG	0	0	0	vif	ATA	0	0	0	vif	TAC	0	0	0	vif	TTG	0	0	0	vif	TTG	0	0	0	vif	AAG	0	0	0	vif	GCA	0	0	0
vif	GCA	0	0	0	vif	ACA	0	0	0	vif	AAA	0	0	0	vif	GTA	0	0	0	vif	ACA	0	0	0	vif	TTG	0	0	0	vif	GCA	0	0	0	vif	GCA	0	0	0	vif	GTA	0	0	0	vif	GGA	0	0	0
vif	CTA	0	0	0	vif	GCA	0	0	0	vif	TGG	0	0	0	vif	GGG	0	0	0	vif	CCA	0	0	0	vif	GCA	0	0	0	vif	CTA	0	0	0	vif	TTA	0	0	0	vif	GGA	0	0	0	vif	CAT	0	0	0
vif	GCA	0	0	0	vif	TTA	0	0	0	vif	AAC	0	0	0	vif	TCT	0	0	0	vif	AAA	0	0	0	vif	CTA	0	0	0	vif	GTA	0	0	0	vif	GCA	0	0	0	vif	TCC	0	0	0	vif	AAC	0	0	0
vif	GCA	0	0	0	vif	AGA	0	0	0	vif	GAG	0	0	0	vif	CTA	0	0	0	vif	AGG	0	0	0	vif	GCA	0	0	0	vif	GCA	0	0	0	vif	GCA	0	0	0	vif	CTA	0	0	0	vif	AAG	0	0	0
vif	TTA	0	0	0	vif	CCA	0	0	0	vif	CCC	0	0	0	vif	CAG	0	0	0	vif	AGA	0	0	0	vif	GCA	0	0	0	vif	TTA	0	0	0	vif	CTA	0	0	0	vif	CAG	0	0	0	vif	GTA	0	0	0
vif	GTA	0	0	0	vif	CCA	0	0	0	vif	CAG	0	0	0	vif	TAC	0	0	0	vif	AAG	0	0	0	vif	TTA	0	0	0	vif	ATA	0	0	0	vif	GTA	0	0	0	vif	TAC	0	0	0	vif	GGG	0	0	0
vif	AGA	0	0	0	vif	AAA	0	0	0	vif	AGG	0	0	0	vif	TTG	0	0	0	vif	CCA	0	0	0	vif	GTA	0	0	0	vif	ACA	0	0	0	vif	ACA	0	0	0	vif	TTG	0	0	0	vif	TCT	0	0	0
vif	CCA	0	0	0	vif	AGG	0	0	0	vif	ACC	0	0	0	vif	GCA	0	0	0	vif	CCT	0	0	0	vif	ACA	0	0	0	vif	CCA	0	0	0	vif	CCA	0	0	0	vif	GCA	0	0	0	vif	CTA	0	0	0
vif	AGA	0	0	0	vif	AGA	0	0	0	vif	AAG	0	0	0	vif	CTA	0	0	0	vif	TTG	0	0	0	vif	CCA	0	0	0	vif	AAA	0	0	0	vif	AAA	0	0	0	vif	CTA	0	0	0	vif	CAG	0	0	0
vif	AAG	0	0	0	vif	AGG	0	0	0	vif	GGC	0	0	0	vif	GTA	0	0	0	vif	CCT	0	0	0	vif	AAA	0	0	0	vif	AGG	0	0	0	vif	CAG	0	0	0	vif	GCA	0	0	0	vif	TAC	0	0	0
vif	ACA	0	0	0	vif	CCA	0	0	0	vif	CAC	0	0	0	vif	GCA	0	0	0	vif	AGT	0	0	0	vif	AAG	0	0	0	vif	ACA	0	0	0	vif	ACA	0	0	0	vif	GCT	0	0	0	vif	TTG	0	0	0
vif	AAG	0	0	0	vif	CCT	0	0	0	vif	AGA	0	0	0	vif	CTA	0	0	0	vif	GTT	0	0	0	vif	ACA	0	0	0	vif	AAA	0	0	0	vif	AAA	0	0	0	vif	TTA	0	0	0	vif	GCA	0	0	0
vif	CCA	0	0	0	vif	TTA	0	0	0	vif	GGG	0	0	0	vif	ATA	0	0	0	vif	AAG	0	0	0	vif	AAG	0	0	0	vif	CCA	0	0	0	vif	CCA	0	0	0	vif	AGA	0	0	0	vif	CTA	0	0	0
vif	CCT	0	0	0	vif	CCT	0	0	0	vif	AGC	0	0	0	vif	AAA	0	0	0	vif	AAA	0	0	0	vif	CCA	0	0	0	vif	CCT	0	0	0	vif	CCT	0	0	0	vif	ACA	0	0	0	vif	ACA	0	0	0
vif	TTG	0	0	0	vif	AGT	0	0	0	vif	CAT	0	0	0	vif	CCA	0	0	0	vif	CTG	0	0	0	vif	CCT	0	0	0	vif	GTG	0	0	0	vif	TTG	0	0	0	vif	CCA	0	0	0	vif	GCA	0	0	0
vif	CCT	0	0	0	vif	GTT	0	0	0	vif	ACA	0	0	0	vif	AAA	0	0	0	vif	ACA	0	0	0	vif	TTG	0	0	0	vif	CCC	0	0	0	vif	CCT	0	0	0	vif	AAA	0	0	0	vif	TTA	0	0	0
vif	AGT	0	0	0	vif	TCA	0	0	0	vif	ATG	0	0	0	vif	AAG	0	0	0	vif	GAG	0	0	0	vif	CCT	0	0	0	vif	AGT	0	0	0	vif	AGT	0	0	0	vif	AAG	0	0	0	vif	ATA	0	0	0
vif	GTT	0	0	0	vif	AAA	0	0	0	vif	AAT	0	0	0	vif	AAA	0	0	0	vif	GAT	0	0	0	vif	AGT	0	0	0	vif	GTT	0	0	0	vif	GTT	0	0	0	vif	ACA	0	0	0	vif	ACA	0	0	0
vif	GCA	0	0	0	vif	CTA	0	0	0	vif	GGA	0	0	0	vif	AAG	0	0	0	vif	AGA	0	0	0	vif	ATT	0	0	0	vif	AGC	0	0	0	vif	ACG	0	0	0	vif	AAG	0	0	0	vif	CCA	0	0	0
vif	AAA	0	0	0	vif	ACA	0	0	0	vif	CAC	0	0	0	vif	CCA	0	0	0	vif	TGG	0	3	1	vif	GCA	0	0	0	vif	AAA	0	0	0	vif	AAA	0	0	0	vif	CCA	0	0	0	vif	AAA	0	0	0
vif	CTG	0	0	0	vif	GAG	0	0	0	vif	TAG	0	0	0	vif	CCT	0	0	0	vif	AAC	0	0	0	vif	AAA	0	0	0	vif	CTA	0	0	0	vif	CTG	0	0	0	vif	CCT	0	0	0	vif	AAG	0	0	0
vif	ACA	0	0	0	vif	GAT	0	0	0	vpr	ATG	0	0	0	vif	TTG	0	0	0	vif	AAG	0	0	0	vif	CTG	0	0	0	vif	ACA	0	0	0	vif	ACA	0	0	0	vif	TTG	0	0	0	vif	ACA	0	0	0
vif	GAG	0	0	0	vif	AGA	0	0	0	vpr	GAA	0	0	0	vif	CCT	0	0	0	vif	CCC	0	0	0	vif	ACA	0	0	0	vif	GAG	0	0	0	vif	GAG	0	0	0	vif	CCT	0	0	0	vif	AAG	0	0	0
vif	GAC	0	0	0	vif	TGG	0	0	0	vpr	CGA	0	0	0	vif	AGT	0	0	0	vif	CAG	0	0	0	vif	GAG	0	0	0	vif	GAT	0	0	0	vif	GAT	0	0	0	vif	AGT	0	0	0	vif	CCA	0	0	0
vif	AGA	0	0	0	vif	AAC	0	0	0	vpr	GCC	0	0	0	vif	GTG	0	0	0	vif	AGG	0	0	0	vif	GAT	0	0	0	vif	AGA	0	0	0	vif	AGA	0	0	0	vif	GTT	0	0	0	vif	CCT	0	0	0
vif	TGG	0	2	0	vif	AAG	0	0	0	vpr	CCA	0	0	0	vif	GTA	0	0	0	vif	ACC	0	0	0	vif	AGA	0	0	0	vif	TGG	0	0	0	vif	TGG	0	0	0	vif	AAG	0	0	0	vif	TTG	0	0	0
vif	AAC	0	0	0	vif	CCC	0	0	0	vpr	GAG	0	0	0	vif	AAA	0	0	0	vif	AAG	0	0	0	vif	TGG	0	0	0	vif	AAC	0	0	0	vif	AAC	0	0	0	vif	AAA	0	0	0	vif	CCT	0	0	0
vif	AAG	0	0	0	vif	CAG	0	0	0	vpr	GAC	0	0	0	vif	TTG	0	0	0	vif	GGC	0	0	0	vif	AAC	0	0	0	vif	AAG	0	0	0	vif	AAG	0	0	0	vif	CTG	0	0	0	vif	AGT	0	0	0
vif	CCC	0	0	0	vif	AAG	0	0	0	vpr	CAA	0	0	0	vif	ACA	0	0	0	vif	CAC	0	0	0	vif	AAA	0	0	0	vif	CCC	0	0	0	vif	CCC	0	0	0	vif	ACA	0	0	0	vif	GTT	0	0	0
vif	CAG	0	0	0	vif	ACC	0	0	0	vpr	GGG	0	0	0	vif	GAG	0	0	0	vif	AGA	0	0	0	vif	CCC	0	0	0	vif	CAG	0	0	0	vif	CGG	0	0	0	vif	GAG	0	0	0	vif	ACA	0	0	0
vif	AAG	0	0	0	vif	AAG	0	0	0	vpr	CCA	0	0	0	vif	GAT	0	0	0	vif	GGG	0	0	0	vif	CAG	0	0	0	vif	AAG	0	0	0	vif	AAG	0	0	0	vif	GAT	0	0	0	vif	AAG	0	0	0
vif	ACC	0	0	0	vif	GAC	0	0	0	vpr	CAG	0	0	0	vif	AGA	0	0	0	vif	AGC	0	0	0	vif	AAG	0	0	0	vif	ACC	0	0	0	vif	ACC	0	0	0	vif	AGA	0	0	0	vif	CTA	0	0	0
vif	AAG	0	0	0	vif	CAC	0	0	0	vpr	AGG	0	0	0	vif	TGG	0	0	0	vif	CAT	0	0	0	vif	ACC	0	0	0	vif	AAG	0	0	0	vif	AAG	0	0	0	vif	TGG	0	1	0	vif	ACA	0	0	0
vif	GGC	0	0	0	vif	AGA	0	0	0	vpr	GAG	0	0	0	vif	AAC	0	0	0	vif	ACC	0	0	0	vif	AAG	0	0	0	vif	GGC	0	0	0	vif	GGC	0	0	0	vif	AAC	0	0	0	vif	GAG	0	0	0
vif	CAC	0	0	0	vif	GAG	0	0	0	vpr	CCA	0	0	0	vif	AGG	0	0	0	vif	ATG	0	0	0	vif	GGC	0	0	0	vif	CAC	0	0	0	vif	CAC	0	0	0	vif	AAG	0	0	0	vif	GAT	0	0	0
vif	AAA	0	0	0	vif	AGC	0	0	0	vpr	TAC	0	0	0	vif	CCC	0	0	0	vif	AAT	0	0	0	vif	CAC	0	0	0	vif	AGA	0	0	0	vif	AGA	0	0	0	vif	CCC	0	0	0	vif	AGA	0	0	0
vif	GGG	0	0	0	vif	CAT	0	0	0	vpr	AAT	0	0	0	vif	CAG	0	0	0	vif	GGG	0	0	0	vif	AGA	0	0	0	vif	GAG	0	0	0	vif	GGG	0	0	0	vif	CGG	0	0	0	vif	TGG	0	3	0
vif	AGC	0	0	0	vif	TCA	0	0	0	vpr	GAA	0	0	0	vif	AAG	0	0	0	vif	CAC	0	0	0	vif	GGG	0	0	0	vif	AGC	0	0	0	vif	AAC	0	0	0	vif	AAG	0	0	0	vif	AAC	0	0	0
vif	CAT	0	0	0	vif	ATG	0	0	0	vpr	TGG	0	0	0	vif	ACC	0	0	0	vif	TAG	0	0	0	vif	AGC	0	0	0	vif	CAT	0	0	0	vif	CAT	0	0	0	vif	ATC	0	0	0	vif	AAG	0	0	0
vif	ACA	0	0	0	vif	AAT	0	0	0	vpr	ACA	0	0	0	vif	AAG	0	0	0	vpr	NNN	0	0	0	vif	CAT	0	0	0	vif	ACA	0	0	0	vif	ACA	0	0	0	vif	AAG	0	0	0	vif	CCC	0	0	0
vif	ATG	0	0	0	vif	GGA	0	0	0	vpr	CTA	0	0	0	vif	GGC	0	0	0	vpr	NNN	0	0	0	vif	ACA	0	0	0	vif	ATG	0	0	0	vif	ATG	0	0	0	vif	GGC	0	0	0	vif	CAG	0	0	0
vif	AGT	0	0	0	vif	CAC	0	0	0	vpr	GAA	0	0	0	vif	CAC	0	0	0	vpr	NNN	0	0	0	vif	ATG	0	0	0	vif	AAT	0	0	0	vif	AAT	0	0	0	vif	CAC	0	0	0	vif	AAG	0	0	0
vif	GGA	0	0	0	vif	TAG	0	0	0	vpr	CTT	0	0	0	vif	AGA	0	0	0	vpr	NNN	0	0	0	vif	AAT	0	0	0	vif	GGA	0	0	0	vif	GGA	0	0	0	vif	AGA	0	0	0	vif	ATC	0	0	0
vif	CAC	0	0	0	vpr	ATG	0	0	0	vpr	TTG	0	0	0	vif	GAG	0	0	0	vpr	NNN	0	0	0	vif	GGA	0	0	0	vif	CAC	0	0	0	vif	CGC	0	0	0	vif	GGG	0	0	0	vif	ACG	0	0	0
vif	TAG	0	0	0	vpr	GAA	0	0	0	vpr	GAG	0	0	0	vif	AGC	0	0	0	vpr	NNN	0	0	0	vif	CAC	0	0	0	vif	TAG	0	0	0	vif	TAG	0	0	0	vif	AGC	0	0	0	vif	GGC	0	0	0
vpr	ATG	0	0	0	vpr	CAA	0	0	0	vpr	GAG	0	0	0	vif	CAT	0	0	0	vpr	NNN	0	0	0	vif	TAG	0	0	0	vpr	ATG	0	0	0	vpr	ATG	0	0	0	vif	CAT	0	0	0	vif	CAC	0	0	0
vpr	GAA	0	0	0	vpr	GCC	0	0	0	vpr	CTT	0	0	0	vif	ACA	0	0	0	vpr	NNN	0	0	0	vpr	ATG	0	0	0	vpr	GAA	0	0	0	vpr	GAA	0	0	0	vif	ACA	0	0	0	vif	AAA	1	0	0
vpr	CAA	0	0	0	vpr	CCA	0	0	0	vpr	AAG	0	0	0	vif	ATG	0	0	0	vpr	NNN	0	0	0	vpr	GAA	0	0	0	vpr	CAA	0	0	0	vpr	CAA	0	0	0	vif	ATG	0	0	0	vif	GGG	0	0	0
vpr	GCC	0	0	0	vpr	GAA	0	0	0	vpr	AAT	0	0	0	vif	AAT	0	0	0	vpr	NTG	0	0	0	vpr	CAA	0	0	0	vpr	GCC	0	0	0	vpr	GCC	0	0	0	vif	AAT	0	0	0	vif	AGC	0	0	0
vpr	CCA	0	0	0	vpr	GAC	0	0	0	vpr	GAA	0	0	0	vif	GGA	0	0	0	vpr	TTT	0	0	0	vpr	ACC	0	0	0	vpr	CCA	0	0	0	vpr	CCG	0	0	0	vif	GGA	0	0	0	vif	CAT	0	0	0
vpr	GAA	0	0	0	vpr	CAA	0	0	0	vpr	GCT	0	0	0	vif	CAC	0	0	0	vpr	ATT	0	0	0	vpr	CCA	0	0	0	vpr	GAA	0	0	0	vpr	GAA	0	0	0	vif	CAC	0	0	0	vif	ACA	0	0	0
vpr	GAC	0	0	0	vpr	GGA	0	0	0	vpr	GTC	0	0	0	vif	TAG	0	0	0	vpr	CAT	0	0	0	vpr	GAA	0	0	0	vpr	GAC	0	0	0	vpr	GAC	0	0	0	vif	TAG	0	0	0	vif	ATG	0	0	0
vpr	CAA	0	0	0	vpr	CCA	0	0	0	vpr	AGA	0	0	0	vpr	ATG	0	0	0	vpr	TTC	0	0	0	vpr	GAC	0	0	0	vpr	CAA	0	0	0	vpr	CAA	0	0	0	vpr	ATG	0	0	0	vif	CAT	0	0	0
vpr	GGG	0	0	0	vpr	CAG	0	0	0	vpr	CAT	0	0	0	vpr	GAA	0	0	0	vpr	AGA	0	0	0	vpr	CAA	0	0	0	vpr	GGG	0	0	0	vpr	GGG	0	0	0	vpr	GAA	0	0	0	vif	GGA	0	0	0
vpr	CCA	0	0	0	vpr	AGA	0	0	0	vpr	TTC	0	0	0	vpr	CAG	0	0	0	vpr	ATT	0	0	0	vpr	GGG	0	0	0	vpr	CCA	0	0	0	vpr	CCA	0	0	0	vpr	CAA	0	0	0	vif	CAT	0	0	0
vpr	CAA	0	0	0	vpr	GAG	0	0	0	vpr	CCT	0	0	0	vpr	GCC	0	0	0	vpr	GGG	0	0	0	vpr	CCA	0	0	0	vpr	CAG	0	0	0	vpr	CAG	0	0	0	vpr	GCC	0	0	0	vif	TAG	0	0	0
vpr	AGG	0	0	0	vpr	CCA	0	0	0	vpr	ATG	0	0	0	vpr	CCA	0	0	0	vpr	TGT	0	0	0	vpr	CAG	0	0	0	vpr	AGA	0	0	0	vpr	AGG	0	0	0	vpr	CCG	0	0	0	vpr	ATG	0	0	0
vpr	GAG	0	0	0	vpr	TTC	0	0	0	vpr	CCA	0	0	0	vpr	GAA	0	0	0	vpr	CAA	0	0	0	vpr	AGG	0	0	0	vpr	GAG	0	0	0	vpr	GAA	0	0	0	vpr	GAA	0	0	0	vpr	GAA	0	0	0
vpr	CCA	0	0	0	vpr	AAT	0	0	0	vpr	TGG	0	0	0	vpr	GAC	0	0	0	vpr	CAT	0	0	0	vpr	GAG	0	0	0	vpr	CCA	0	0	0	vpr	CCA	0	0	0	vpr	GAT	0	0	0	vpr	CAA	0	0	0
vpr	TAC	0	0	0	vpr	GAA	0	0	0	vpr	CTC	0	0	0	vpr	CAA	0	0	0	vpr	AGC	0	0	0	vpr	CCA	0	0	0	vpr	TAC	0	0	0	vpr	TAC	0	0	0	vpr	CAA	0	0	0	vpr	GCC	0	0	0
vpr	AAT	0	0	0	vpr	TGG	0	0	0	vpr	CAT	0	0	0	vpr	GGG	0	0	0	vpr	AGA	0	0	0	vpr	TAC	0	0	0	vpr	AAT	0	0	0	vpr	AAT	0	0	0	vpr	GGG	0	0	0	vpr	CCA	0	0	0
vpr	GAG	0	0	0	vpr	ACA	0	0	0	vpr	GGC	0	0	0	vpr	CCA	0	0	0	vpr	ATA	0	0	0	vpr	AAT	0	0	0	vpr	GAA	0	0	0	vpr	GAA	0	0	0	vpr	CCA	0	0	0	vpr	GAA	0	0	0
vpr	TGG	0	1	0	vpr	CTA	0	0	0	vpr	TTA	0	0	0	vpr	CAG	0	0	0	vpr	GGC	0	0	0	vpr	GAA	0	0	0	vpr	TGG	0	0	0	vpr	TGG	0	0	0	vpr	CAG	0	0	0	vpr	GAT	0	0	0
vpr	ACA	0	0	0	vpr	GAA	0	0	0	vpr	GGA	0	0	0	vpr	AGA	0	0	0	vpr	ATT	0	0	0	vpr	TGG	0	0	0	vpr	ACA	0	0	0	vpr	ACG	0	0	0	vpr	AGG	0	0	0	vpr	CAC	0	0	0
vpr	CTA	0	0	0	vpr	CTT	0	0	0	vpr	CAA	0	0	0	vpr	GAG	0	0	0	vpr	ACT	0	0	0	vpr	ACA	0	0	0	vpr	CTA	0	0	0	vpr	CTA	0	0	0	vpr	GAG	0	0	0	vpr	GGG	0	0	0
vpr	GAG	0	0	0	vpr	TTA	0	0	0	vpr	CAT	0	0	0	vpr	CCA	0	0	0	vpr	CGA	0	0	0	vpr	CTA	0	0	0	vpr	GAG	0	0	0	vpr	GAG	0	0	0	vpr	CCA	0	0	0	vpr	CCA	0	0	0
vpr	CTT	0	0	0	vpr	GAG	0	0	0	vpr	ATC	0	0	0	vpr	TAC	0	0	0	vpr	CAG	0	0	0	vpr	GAG	0	0	0	vpr	CTT	0	0	0	vpr	CTT	0	0	0	vpr	TAC	0	0	0	vpr	CAA	0	0	0
vpr	TTA	0	0	0	vpr	GAG	0	0	0	vpr	TAT	0	0	0	vpr	AAT	0	0	0	vpr	AGG	0	0	0	vpr	CTT	0	0	0	vpr	TTA	0	0	0	vpr	TTA	0	0	0	vpr	AAT	0	0	0	vpr	AGG	0	0	0
vpr	GAG	0	0	0	vpr	CTT	0	0	0	vpr	GAA	0	0	0	vpr	GAA	0	0	0	vpr	AGA	0	0	0	vpr	TTA	0	0	0	vpr	GAA	0	0	0	vpr	GAG	0	0	0	vpr	GAA	0	0	0	vpr	GAG	0	0	0
vpr	GAG	0	0	0	vpr	AAG	0	0	0	vpr	ACT	0	0	0	vpr	TGG	0	0	0	vpr	GCA	0	0	0	vpr	GAA	0	0	0	vpr	GAA	0	0	0	vpr	GAG	0	0	0	vpr	TGG	0	1	0	vpr	CCA	0	0	0
vpr	CTT	0	0	0	vpr	AAT	0	0	0	vpr	TAT	0	0	0	vpr	ACA	0	0	0	vpr	AGA	0	0	0	vpr	GAA	0	0	0	vpr	CTT	0	0	0	vpr	CTT	0	0	0	vpr	ACA	0	0	0	vpr	TAC	0	0	0
vpr	AAG	0	0	0	vpr	GAA	0	0	0	vpr	GGG	0	0	0	vpr	CTA	0	0	0	vpr	AAT	0	0	0	vpr	CTT	0	0	0	vpr	AAG	0	0	0	vpr	AAG	0	0	0	vpr	CTA	0	0	0	vpr	AAT	0	0	0
vpr	AAT	0	0	0	vpr	GCT	0	0	0	vpr	GAT	0	0	0	vpr	GAA	0	0	0	vpr	GGA	0	0	0	vpr	AAG	0	0	0	vpr	AGA	0	0	0	vpr	AGT	0	0	0	vpr	GAG	0	0	0	vpr	GCA	0	0	0
vpr	GAA	0	0	0	vpr	GTT	0	0	0	vpr	ACT	0	0	0	vpr	CTT	0	0	0	vpr	ACC	0	0	0	vpr	AAT	0	0	0	vpr	GAA	0	0	0	vpr	GAA	0	0	0	vpr	CTT	0	0	0	vpr	TGG	0	1	0
vpr	GCT	0	0	0	vpr	AGA	0	0	0	vpr	TGG	0	0	0	vpr	TTA	0	0	0	vpr	GGT	0	0	0	vpr	GAA	0	0	0	vpr	GCT	0	0	0	vpr	GCT	0	0	0	vpr	TTA	0	0	0	vpr	ACA	0	0	0
vpr	GTT	0	0	0	vpr	CAT	0	0	0	vpr	GCA	0	0	0	vpr	GAG	0	0	0	vpr	AGA	0	0	0	vpr	GCT	0	0	0	vpr	GTT	0	0	0	vpr	GTT	0	0	0	vpr	GAG	0	0	0	vpr	TTA	0	0	0
vpr	AGA	0	0	0	vpr	TTT	0	0	0	vpr	GGA	0	0	0	vpr	GAG	0	0	0	vpr	TCC	0	0	0	vpr	GTT	0	0	0	vpr	AGA	0	0	0	vpr	AGA	0	0	0	vpr	GAG	0	0	0	vpr	GAG	0	0	0
vpr	CAT	0	0	0	vpr	CCT	0	0	0	vpr	GTN	0	0	0	vpr	CTT	0	0	0	vpr	ATG	0	0	0	vpr	AGA	0	0	0	vpr	CAT	0	0	0	vpr	CAT	0	0	0	vpr	CTT	0	0	0	vpr	CTT	0	0	0
vpr	TTT	0	0	0	vpr	AGG	0	0	0	vpr	NNN	0	0	0	vpr	AAG	0	0	0	vpr	GAA	0	0	0	vpr	CAT	0	0	0	vpr	TTT	0	0	0	vpr	TTT	0	0	0	vpr	AAG	0	0	0	vpr	TTA	0	0	0
vpr	CCT	0	0	0	vpr	CCA	0	0	0	vpr	NNN	0	0	0	vpr	AAT	0	0	0	vpr	CAA	0	0	0	vpr	TTC	0	0	0	vpr	CCT	0	0	0	vpr	CCT	0	0	0	vpr	AAT	0	0	0	vpr	GAG	0	0	0
vpr	AGG	0	0	0	vpr	TGG	0	0	0	vpr	NNN	0	0	0	vpr	GAA	0	0	0	vpr	GCC	0	0	0	vpr	CCT	0	0	0	vpr	AGG	0	0	0	vpr	AGG	0	0	0	vpr	GAG	0	0	0	vpr	GAG	0	0	0
vpr	ACC	0	0	0	vpr	CTC	0	0	0	vpr	NNN	0	0	0	vpr	GCT	0	0	0	vpr	CCA	0	0	0	vpr	AGG	0	0	0	vpr	ACA	0	0	0	vpr	ACA	0	0	0	vpr	GCT	0	0	0	vpr	CTG	0	0	0
vpr	TGG	0	0	0	vpr	CAT	0	0	0	vpr	NNN	0	0	0	vpr	GTT	0	0	0	vpr	GAG	0	0	0	vpr	GTG	0	0	0	vpr	TGG	0	0	0	vpr	TGG	0	0	0	vpr	GTT	0	0	0	vpr	AAG	0	0	0
vpr	CTT	0	0	0	vpr	AGC	0	0	0	vpr	NNN	0	0	0	vpr	AGA	0	0	0	vpr	GAC	0	0	0	vpr	TGG	0	0	0	vpr	CTC	0	0	0	vpr	CTT	0	0	0	vpr	AGA	0	0	0	vpr	AGT	0	0	0
vpr	CAT	0	0	0	vpr	TTA	0	0	0	vpr	NNN	0	0	0	vpr	CAT	0	0	0	vpr	CAA	0	0	0	vpr	CTC	0	0	0	vpr	CAT	0	0	0	vpr	CAT	0	0	0	vpr	CAT	0	0	0	vpr	GAA	0	0	0
vpr	GGC	0	0	0	vpr	GGG	0	0	0	vpr	NNN	0	0	0	vpr	TTC	0	0	0	vpr	GGG	0	0	0	vpr	CAT	0	0	0	vpr	GAC	0	0	0	vpr	GGC	0	0	0	vpr	TTT	0	0	0	vpr	GCT	0	0	0
vpr	TTA	0	0	0	vpr	CAA	0	0	0	vpr	NNN	0	0	0	vpr	CCT	0	0	0	vpr	CCA	0	0	0	vpr	GGC	0	0	0	vpr	TTA	0	0	0	vpr	TTG	0	0	0	vpr	CCT	0	0	0	vpr	GTT	0	0	0
vpr	GGG	0	0	0	vpr	TAT	0	0	0	vpr	NNN	0	0	0	vpr	AGA	0	0	0	vpr	CAG	0	0	0	vpr	TTA	0	0	0	vpr	GGA	0	0	0	vpr	GGA	0	0	0	vpr	AGG	0	0	0	vpr	AGA	0	0	0
vpr	CAG	0	0	0	vpr	ATC	0	0	0	vpr	NTG	0	0	0	vpr	ATT	0	0	0	vpr	AGG	0	0	0	vpr	GGG	0	0	0	vpr	CAA	0	0	0	vpr	CAA	0	0	0	vpr	CCA	0	0	0	vpr	CAC	0	0	0
vpr	TAT	0	0	0	vpr	TAT	0	0	0	vpr	TTT	0	0	0	vpr	TGG	0	0	0	vpr	GAG	0	0	0	vpr	CAA	0	0	0	vpr	TAT	0	0	0	vpr	TAT	0	0	0	vpr	TGG	0	1	0	vpr	TTT	0	0	0
vpr	ATC	0	0	0	vpr	GAA	0	0	0	vpr	ATC	0	0	0	vpr	CTC	0	0	0	vpr	CCA	0	0	0	vpr	TAT	0	0	0	vpr	ATC	0	0	0	vpr	ATC	0	0	0	vpr	TTA	0	0	0	vpr	CCT	0	0	0
vpr	TAT	0	0	0	vpr	ACT	0	0	0	vpr	CAT	0	0	0	vpr	CAT	0	0	0	vpr	TAC	0	0	0	vpr	ATC	0	0	0	vpr	TAT	0	0	0	vpr	TAT	0	0	0	vpr	CAT	0	0	0	vpr	AGG	0	0	0
vpr	GAA	0	0	0	vpr	TAC	0	0	0	vpr	TAC	0	0	0	vpr	AGC	0	0	0	vpr	CAT	0	0	0	vpr	TAT	0	0	0	vpr	GAA	0	0	0	vpr	GAA	0	0	0	vpr	AGC	0	0	0	vpr	ATA	0	0	0
vpr	ACT	0	0	0	vpr	GGG	0	0	0	vpr	AGA	0	0	0	vpr	CTA	0	0	0	vpr	GAA	0	0	0	vpr	GAA	0	0	0	vpr	ACT	0	0	0	vpr	ACT	0	0	0	vpr	TTA	0	0	0	vpr	TGG	0	3	0
vpr	TAT	0	0	0	vpr	GAT	0	0	0	vpr	ATT	0	0	0	vpr	GGG	0	0	0	vpr	TGG	0	1	0	vpr	ACT	0	0	0	vpr	TAT	0	0	0	vpr	TAT	0	0	0	vpr	GGG	0	0	0	vpr	TTA	0	0	0
vpr	GGG	0	0	0	vpr	ACT	0	0	0	vpr	GGG	0	0	0	vpr	CAA	0	0	0	vpr	GCA	0	0	0	vpr	TAT	0	0	0	vpr	GGG	0	0	0	vpr	GGG	0	0	0	vpr	CAA	0	0	0	vpr	CNN	0	0	0
vpr	GAT	0	0	0	vpr	TGG	0	0	0	vpr	TGT	0	0	0	vpr	TAT	0	0	0	vpr	CTA	0	0	0	vpr	GGG	0	0	0	vpr	GAT	0	0	0	vpr	GAT	0	0	0	vpr	CAT	0	0	0	vpr	NNN	0	0	0
vpr	ACT	0	0	0	vpr	GCA	0	0	0	vpr	CGG	0	0	0	vpr	ATC	0	0	0	vpr	GAG	0	0	0	vpr	GAT	0	0	0	vpr	ACC	0	0	0	vpr	ACT	0	0	0	vpr	ATC	0	0	0	vpr	NNN	0	0	0
vpr	TGG	0	1	0	vpr	GGG	0	0	0	vpr	CAT	0	0	0	vpr	TAT	0	0	0	vpr	CTT	0	0	0	vpr	ACT	0	0	0	vpr	TGG	0	0	0	vpr	TGG	0	1	0	vpr	TAT	0	0	0	vpr	NNN	0	0	0
vpr	GCA	0	0	0	vpr	GTN	0	0	0	vpr	AGC	0	0	0	vpr	GAA	0	0	0	vpr	TTA	0	0	0	vpr	TGG	0	0	0	vpr	ACT	0	0	0	vpr	ACA	0	0	0	vpr	GAA	0	0	0	vpr	NNN	0	0	0
vpr	GGA	0	0	0	vpr	NNN	0	0	0	vpr	AGA	0	0	0	vpr	ACT	0	0	0	vpr	GAA	0	0	0	vpr	ACA	0	0	0	vpr	GGA	0	0	0	vpr	GGA	0	0	0	vpr	ACT	0	0	0	vpr	NNN	0	0	0
vpr	GTN	0	0	0	vpr	NNN	0	0	0	vpr	ATA	0	0	0	vpr	TAT	0	0	0	vpr	GAG	0	0	0	vpr	GGA	0	0	0	vpr	GTN	0	0	0	vpr	GTN	0	0	0	vpr	TAT	0	0	0	vpr	NNN	0	0	0
vpr	NNN	0	0	0	vpr	NNN	0	0	0	vpr	GGC	0	0	0	vpr	GGG	0	0	0	vpr	CTT	0	0	0	vpr	GTN	0	0	0	vpr	NNN	0	0	0	vpr	NNN	0	0	0	vpr	GGG	0	0	0	vpr	NNN	0	0	0
vpr	NNN	0	0	0	vpr	NNN	0	0	0	vpr	ATT	0	0	0	vpr	GAT	0	0	0	vpr	AAG	0	0	0	vpr	NNN	0	0	0	vpr	NNN	0	0	0	vpr	NNN	0	0	0	vpr	GAT	0	0	0	vpr	NAA	0	0	0
vpr	NNN	0	0	0	vpr	NNN	0	0	0	vpr	ACC	0	0	0	vpr	ACT	0	0	0	vpr	AGT	0	0	0	vpr	NNN	0	0	0	vpr	NNN	0	0	0	vpr	NNN	0	0	0	vpr	ACT	0	0	0	vpr	ACT	0	0	0
vpr	NNN	0	0	0	vpr	NNN	0	0	0	vpr	CGA	0	0	0	vpr	TGG	0	0	0	vpr	GAA	0	0	0	vpr	NNN	0	0	0	vpr	NNN	0	0	0	vpr	NNN	0	0	0	vpr	TGG	0	3	0	vpr	TAT	0	0	0
vpr	NNN	0	0	0	vpr	NNN	0	0	0	vpr	CAG	0	0	0	vpr	ACA	0	0	0	vpr	GCT	0	0	0	vpr	NNN	0	0	0	vpr	NNN	0	0	0	vpr	NNN	0	0	0	vpr	GCA	0	0	0	vpr	GGG	0	0	0
vpr	NNN	0	0	0	vpr	NNN	0	0	0	vpr	AGG	0	0	0	vpr	GGA	0	0	0	vpr	GTT	0	0	0	vpr	NNN	0	0	0	vpr	NNN	0	0	0	vpr	NNN	0	0	0	vpr	GGA	0	0	0	vpr	GAT	0	0	0
vpr	NNN	0	0	0	vpr	NNN	0	0	0	vpr	AGA	0	0	0	vpr	GTN	0	0	0	vpr	AGA	0	0	0	vpr	NNN	0	0	0	vpr	NNN	0	0	0	vpr	NNN	0	0	0	vpr	GTN	0	0	0	vpr	ACC	0	0	0
vpr	NNN	0	0	0	vpr	NNN	0	0	0	vpr	GCA	0	0	0	vpr	NNN	0	0	0	vpr	CAC	0	0	0	vpr	NNN	0	0	0	vpr	NNN	0	0	0	vpr	NNN	0	0	0	vpr	NNN	0	0	0	vpr	TGG	0	2	1
vpr	NNN	0	0	0	vpr	NTG	0	0	0	vpr	AGA	0	0	0	vpr	NNN	0	0	0	vpr	TTT	0	0	0	vpr	NNN	0	0	0	vpr	NNN	0	0	0	vpr	NNN	0	0	0	vpr	NNN	0	0	0	vpr	ACA	0	0	0
vpr	NNN	0	0	0	vpr	TTC	0	0	0	vpr	AAT	0	0	0	vpr	NNN	0	0	0	vpr	CCT	0	0	0	vpr	NNN	0	0	0	vpr	NNN	0	0	0	vpr	NNN	0	0	0	vpr	NNN	0	0	0	vpr	GGA	0	0	0
vpr	NTG	0	0	0	vpr	ATT	0	0	0	vpr	GGA	0	0	0	vpr	NNN	0	0	0	vpr	AGG	0	0	0	vpr	NNN	0	0	0	vpr	NTG	0	0	0	vpr	NTG	0	0	0	vpr	NNN	0	0	0	vpr	GTG	0	0	0
vpr	CTT	0	0	0	vpr	CAT	0	0	0	vpr	GCC	0	0	0	vpr	NNN	0	0	0	vpr	ATT	0	0	0	vpr	NTG	0	0	0	vpr	TTT	0	0	0	vpr	TTT	0	0	0	vpr	NNN	0	0	0	vpr	GAA	0	0	0
vpr	ATT	0	0	0	vpr	TTC	0	0	0	vpr	AGT	0	0	0	vpr	NNN	0	0	0	vpr	TGG	0	0	0	vpr	TTT	0	0	0	vpr	ATT	0	0	0	vpr	ACT	0	0	0	vpr	NNN	0	0	0	vpr	GTC	0	0	0
vpr	CAT	0	0	0	vpr	AGG	0	0	0	vpr	AGA	0	0	0	vpr	NNN	0	0	0	vpr	CTC	0	0	0	vpr	ATT	0	0	0	vpr	CAT	0	0	0	vpr	CAT	0	0	0	vpr	NNN	0	0	0	vpr	CTA	0	0	0
vpr	TTC	0	0	0	vpr	ATT	0	0	0	vpr	TCC	0	0	0	vpr	NNN	0	0	0	vpr	CAT	0	0	0	vpr	CAT	0	0	0	vpr	TTC	0	0	0	vpr	TTC	0	0	0	vpr	NNN	0	0	0	vpr	ATA	0	0	0
vpr	AGA	0	0	0	vpr	GGG	0	0	0	vpr	TAG	0	0	0	vpr	NNN	0	0	0	vpr	GGC	0	0	0	vpr	TAC	0	0	0	vpr	AGA	0	0	0	vpr	AGG	0	0	0	vpr	NNN	0	0	0	vpr	AGA	0	0	0
vpr	ATT	0	0	0	vpr	TGT	0	0	0	tat1	ATG	0	0	0	vpr	NNN	0	0	0	vpr	TTA	0	0	0	vpr	AGA	0	0	0	vpr	ATT	0	0	0	vpr	ATT	0	0	0	vpr	NNN	0	0	0	vpr	ATG	0	0	0
vpr	GGG	0	0	0	vpr	CAT	0	0	0	tat1	GAG	0	0	0	vpr	NTG	0	0	0	vpr	GGG	0	0	0	vpr	ATC	0	0	0	vpr	GGA	0	0	0	vpr	GGG	0	0	0	vpr	NTG	0	0	0	vpr	CTG	0	0	0
vpr	TGT	0	0	0	vpr	CAT	0	0	0	tat1	CCA	0	0	0	vpr	TTT	0	0	0	vpr	CAA	0	0	0	vpr	GGG	0	0	0	vpr	TGT	0	0	0	vpr	TGT	0	0	0	vpr	TTT	0	0	0	vpr	CAA	0	0	0
vpr	CGA	0	0	0	vpr	AGC	0	0	0	tat1	GTA	0	0	0	vpr	ATT	0	0	0	vpr	TAT	0	0	0	vpr	TGT	0	0	0	vpr	CAT	0	0	0	vpr	CAC	0	0	0	vpr	ATT	0	0	0	vpr	CAA	0	0	0
vpr	CAT	0	0	0	vpr	AGA	0	0	0	tat1	GAT	0	0	0	vpr	CAT	0	0	0	vpr	ATC	0	0	0	vpr	CAT	0	0	0	vpr	CAT	0	0	0	vpr	CAT	0	0	0	vpr	CAT	0	0	0	vpr	ATA	0	0	0
vpr	AGC	0	0	0	vpr	ATA	0	0	0	tat1	CCT	0	0	0	vpr	TTC	0	0	0	vpr	TAT	0	0	0	vpr	CAT	0	0	0	vpr	AGC	0	0	0	vpr	AGC	0	0	0	vpr	TTC	0	0	0	vpr	CTG	0	0	0
vpr	AGA	0	0	0	vpr	GGC	0	0	0	tat1	AGA	0	0	0	vpr	AGA	0	0	0	vpr	GAA	0	0	0	vpr	AGC	0	0	0	vpr	AGA	0	0	0	vpr	AGA	0	0	0	vpr	AGA	0	0	0	vpr	TTT	0	0	0
vpr	ATA	0	0	0	vpr	ATT	0	0	0	tat1	CTA	0	0	0	vpr	ATT	0	0	0	vpr	ACT	0	0	0	vpr	AGA	0	0	0	vpr	ATA	0	0	0	vpr	ATA	0	0	0	vpr	ATT	0	0	0	vpr	ATT	0	0	0
vpr	GGC	0	0	0	vpr	ATT	0	0	0	tat1	GAG	0	0	0	vpr	GGG	0	0	0	vpr	TAT	0	0	0	vpr	ATA	0	0	0	vpr	GGC	0	0	0	vpr	GGC	0	0	0	vpr	GGG	0	0	0	vpr	CAT	0	0	0
vpr	ATT	0	0	0	vpr	CGA	0	0	0	tat1	CCC	0	0	0	vpr	TGT	0	0	0	vpr	GGA	0	0	0	vpr	GGT	0	0	0	vpr	ATT	0	0	0	vpr	ATT	0	0	0	vpr	TGT	0	0	0	vpr	TTC	0	0	0
vpr	ACT	0	0	0	vpr	CAG	0	0	0	tat1	TGG	0	2	2	vpr	CAA	0	0	0	vpr	GAT	0	0	0	vpr	GTT	0	0	0	vpr	ATT	0	0	0	vpr	ACT	0	0	0	vpr	CGG	0	0	0	vpr	AGA	0	0	0
vpr	CGT	0	0	0	vpr	AGA	0	0	0	tat1	AAG	0	0	0	vpr	CAT	0	0	0	vpr	ACT	0	0	0	vpr	GCT	0	0	0	vpr	CGA	0	0	0	vpr	CGA	0	0	0	vpr	CAT	0	0	0	vpr	ATT	0	0	0
vpr	CAG	0	0	0	vpr	AGA	0	0	0	tat1	CAT	0	0	0	vpr	AGC	0	0	0	vpr	TGG	0	1	0	vpr	CGA	0	0	0	vpr	CAG	0	0	0	vpr	CAA	0	0	0	vpr	AGC	0	0	0	vpr	GGG	0	0	0
vpr	AGG	0	0	0	vpr	GTA	0	0	0	tat1	CCA	0	0	0	vpr	AGA	0	0	0	vpr	GCA	0	0	0	vpr	CAG	0	0	0	vpr	AGA	0	0	0	vpr	AGG	0	0	0	vpr	AGA	0	0	0	vpr	TGC	0	0	0
vpr	AGA	0	0	0	vpr	AGA	0	0	0	tat1	GGA	0	0	0	vpr	ATA	0	0	0	vpr	GGA	0	0	0	vpr	AGC	0	0	0	vpr	AGA	0	0	0	vpr	AGA	0	0	0	vpr	ATA	0	0	0	vpr	CAA	0	0	0
vpr	GCA	0	0	0	vpr	AAT	0	0	0	tat1	AGT	0	0	0	vpr	GGC	0	0	0	tat1	ATG	0	0	0	vpr	AGA	0	0	0	vpr	GCA	0	0	0	vpr	GCA	0	0	0	vpr	GGC	0	0	0	vpr	CAT	0	0	0
vpr	AGA	0	0	0	vpr	GGA	0	0	0	tat1	CAG	0	0	0	vpr	ATT	0	0	0	tat1	GAA	0	0	0	vpr	GCA	0	0	0	vpr	AGG	0	0	0	vpr	AGA	0	0	0	vpr	ATT	0	0	0	vpr	AGC	0	0	0
vpr	AAT	0	0	0	vpr	GCC	0	0	0	tat1	CCT	0	0	0	vpr	CTT	0	0	0	tat1	CCG	0	0	0	vpr	AGA	0	0	0	vpr	AAT	0	0	0	vpr	AAT	0	0	0	vpr	ACT	0	0	0	vpr	AGA	0	0	0
vpr	GGA	0	0	0	vpr	AGT	0	0	0	tat1	AAA	0	0	0	vpr	CGA	0	0	0	tat1	GTA	0	0	0	vpr	GCA	0	0	0	vpr	GGA	0	0	0	vpr	GGA	0	0	0	vpr	CGA	0	0	0	vpr	ATA	0	0	0
vpr	GCC	0	0	0	vpr	AGA	0	0	0	tat1	ACT	0	0	0	vpr	CAC	0	0	0	tat1	GAT	0	0	0	vpr	AGA	0	0	0	vpr	GCC	0	0	0	vpr	ACC	0	0	0	vpr	CAG	0	0	0	vpr	GGC	0	0	0
vpr	AGT	0	0	0	vpr	TCC	0	0	0	tat1	GCT	0	0	0	vpr	AGG	0	0	0	tat1	CCT	0	0	0	vpr	AAT	0	0	0	vpr	AGT	0	0	0	vpr	AGT	0	0	0	vpr	AGG	0	0	0	vpr	ATT	0	0	0
vpr	AGA	0	0	0	vpr	TAG	0	0	0	tat1	TGT	0	0	0	vpr	AGA	0	0	0	tat1	AGG	0	0	0	vpr	GGA	0	0	0	vpr	AGA	0	0	0	vpr	AGA	0	0	0	vpr	AGA	0	0	0	vpr	ACT	0	0	0
vpr	CCC	0	0	0	tat1	ATG	0	0	0	tat1	AAC	0	0	0	vpr	ACA	0	0	0	tat1	CTA	0	0	0	vpr	ACC	0	0	0	vpr	TCC	0	0	0	vpr	CCC	0	0	0	vpr	GCA	0	0	0	vpr	CCA	0	0	0
vpr	TAG	0	0	0	tat1	GAG	0	0	0	tat1	AAT	0	0	0	vpr	AGG	0	0	0	tat1	GAG	0	0	0	vpr	AGT	0	0	0	vpr	TAG	0	0	0	vpr	TAG	0	0	0	vpr	AGA	0	0	0	vpr	AGG	0	0	0
tat1	ATG	0	0	0	tat1	CCA	0	0	0	tat1	TGC	0	0	0	vpr	AAT	0	0	0	tat1	CCC	0	0	0	vpr	AGA	0	0	0	tat1	ATG	0	0	0	tat1	ATG	0	0	0	vpr	AAT	0	0	0	vpr	AGG	0	0	0
tat1	GAG	0	0	0	tat1	GTA	0	0	0	tat1	TAT	0	0	0	vpr	GGA	0	0	0	tat1	TGG	0	0	0	vpr	TCC	0	0	0	tat1	GAG	0	0	0	tat1	GAA	0	0	0	vpr	GGA	0	0	0	vpr	CCA	0	0	0
tat1	CCA	0	0	0	tat1	GAT	0	0	0	tat1	TGT	0	0	0	vpr	GCC	0	0	0	tat1	AAC	0	0	0	vpr	TAG	0	0	0	tat1	CCA	0	0	0	tat1	CCA	0	0	0	vpr	GCC	0	0	0	vpr	ACA	0	0	0
tat1	GTA	0	0	0	tat1	CCT	0	0	0	tat1	AAA	0	0	0	vpr	AGT	0	0	0	tat1	CAT	0	0	0	tat1	ATG	0	0	0	tat1	GTA	0	0	0	tat1	GTA	0	0	0	vpr	AGT	0	0	0	vpr	AGA	0	0	0
tat1	GAC	0	0	0	tat1	AGA	0	0	0	tat1	AGG	0	0	0	vpr	AGA	0	0	0	tat1	CCA	0	0	0	tat1	GAA	0	0	0	tat1	GAT	0	0	0	tat1	GAC	0	0	0	vpr	AGA	0	0	0	vpr	AAT	0	0	0
tat1	CCT	0	0	0	tat1	CTA	0	0	0	tat1	TGT	0	0	0	vpr	TCC	0	0	0	tat1	GGA	0	0	0	tat1	CCA	0	0	0	tat1	CCT	0	0	0	tat1	CCT	0	0	0	vpr	TCC	0	0	0	vpr	GGA	0	0	0
tat1	AGC	0	0	0	tat1	GAG	0	0	0	tat1	TGC	0	0	0	vpr	TAA	0	0	0	tat1	AGT	0	0	0	tat1	GTA	0	0	0	tat1	AGC	0	0	0	tat1	AGC	0	0	0	vpr	TAG	0	0	0	vpr	GCC	0	0	0
tat1	CTA	0	0	0	tat1	CCC	0	0	0	tat1	TTT	0	0	0	tat1	ATG	0	0	0	tat1	CAG	0	0	0	tat1	GAT	0	0	0	tat1	CTA	0	0	0	tat1	CTA	0	0	0	tat1	ATG	0	0	0	vpr	CGT	0	0	0
tat1	GAG	0	0	0	tat1	TGG	0	1	1	tat1	CAT	0	0	0	tat1	GAG	0	0	0	tat1	CCT	0	0	0	tat1	CCT	0	0	0	tat1	GAG	0	0	0	tat1	GAG	0	1	0	tat1	GAG	0	0	0	vpr	AGA	0	0	0
tat1	CCC	0	0	0	tat1	AAA	0	0	0	tat1	TGC	0	0	0	tat1	CCA	0	0	0	tat1	AAA	0	0	0	tat1	AGA	0	0	0	tat1	CCC	0	0	0	tat1	CCC	0	0	0	tat1	CCA	0	0	0	vpr	TCC	0	0	0
tat1	TGG	0	4	0	tat1	CAT	0	0	0	tat1	CAA	0	0	0	tat1	GTA	0	0	0	tat1	ACT	0	0	0	tat1	CTA	0	0	0	tat1	TGG	0	0	0	tat1	TGG	0	5	0	tat1	GTA	0	0	0	vpr	TAG	0	0	0
tat1	AAG	0	0	0	tat1	CCT	0	0	0	tat1	GTT	0	0	0	tat1	GAT	0	0	0	tat1	GCT	0	0	0	tat1	GAG	0	0	0	tat1	AAA	0	0	0	tat1	AAG	0	0	0	tat1	GAT	0	0	0	tat1	ATG	0	0	0
tat1	CAT	0	0	0	tat1	GGA	0	0	0	tat1	TGC	0	0	0	tat1	CCT	0	0	0	tat1	TGC	0	0	0	tat1	CCC	0	0	0	tat1	CAT	0	0	0	tat1	CAT	0	0	0	tat1	CCT	0	0	0	tat1	GAG	0	0	0
tat1	CCA	0	0	0	tat1	AGT	0	0	0	tat1	TTC	0	0	0	tat1	AAA	0	0	0	tat1	ACA	0	0	0	tat1	TGG	1	0	0	tat1	CCA	0	0	0	tat1	CCA	0	0	0	tat1	AGA	0	0	0	tat1	CCC	0	0	0
tat1	GGA	0	0	0	tat1	CAG	0	0	0	tat1	ACA	0	0	0	tat1	CTA	0	0	0	tat1	AAT	0	0	0	tat1	AAG	0	0	0	tat1	GGA	0	0	0	tat1	GGA	0	0	0	tat1	CTA	0	0	0	tat1	GTA	0	0	0
tat1	AGT	0	0	0	tat1	CCT	0	0	0	tat1	AAA	0	0	0	tat1	GAG	0	0	0	tat1	TGC	0	0	0	tat1	CAT	0	0	0	tat1	AGT	0	0	0	tat1	AGT	0	0	0	tat1	GAG	0	0	0	tat1	GAT	0	0	0
tat1	CAG	0	0	0	tat1	AGG	0	0	0	tat1	AAA	0	0	0	tat1	CCC	0	0	0	tat1	TAT	0	0	0	tat1	CCA	0	0	0	tat1	CAG	0	0	0	tat1	CAG	0	0	0	tat1	CCC	0	0	0	tat1	CCT	0	0	0
tat1	CCT	0	0	0	tat1	ACT	0	0	0	tat1	GGC	0	0	0	tat1	TGG	1	0	0	tat1	TGT	0	0	0	tat1	GGA	0	0	0	tat1	CCT	0	0	0	tat1	CCT	0	0	0	tat1	TGG	0	2	0	tat1	AGC	0	0	0
tat1	AAG	0	0	0	tat1	CCT	0	0	0	tat1	TTA	0	0	0	tat1	GAG	0	0	0	tat1	AAA	0	0	0	tat1	AGT	0	0	0	tat1	AAG	0	0	0	tat1	AAG	0	0	0	tat1	AAG	0	0	0	tat1	CTG	0	0	0
tat1	ACT	0	0	0	tat1	TGT	0	0	0	tat1	GGC	0	0	0	tat1	CAT	0	0	0	tat1	AAG	0	0	0	tat1	CAA	0	0	0	tat1	ACT	0	0	0	tat1	ACT	0	0	0	tat1	CAT	0	0	0	tat1	GCG	0	0	0
tat1	CCT	0	0	0	tat1	AAC	0	0	0	tat1	ATC	0	0	0	tat1	CCA	0	0	0	tat1	TGT	0	0	0	tat1	CCT	0	0	0	tat1	CCT	0	0	0	tat1	GCT	0	0	0	tat1	CCA	0	0	0	tat1	CCC	0	0	0
tat1	TGT	0	0	0	tat1	AAT	0	0	0	tat1	TCC	0	0	0	tat1	GGA	0	0	0	tat1	TGC	0	0	0	tat1	AAG	0	0	0	tat1	TGT	0	0	0	tat1	TGT	0	0	0	tat1	GGA	0	0	0	tat1	TGG	0	1	0
tat1	ACA	0	0	0	tat1	TGC	0	0	0	tat1	TAT	0	0	0	tat1	AGC	0	0	0	tat1	TTT	0	0	0	tat1	ACT	0	0	0	tat1	ACC	0	0	0	tat1	ACC	0	0	0	tat1	AGT	0	0	0	tat1	AAG	0	0	0
tat1	ACT	0	0	0	tat1	TAT	0	0	0	tat1	GGC	0	0	0	tat1	CAG	0	0	0	tat1	CAC	0	0	0	tat1	GCT	0	0	0	tat1	AAA	0	0	0	tat1	CCT	0	0	0	tat1	CAG	0	0	0	tat1	CAT	0	0	0
tat1	TGC	0	0	0	tat1	TGT	0	0	0	tat1	AGG	0	0	0	tat1	CCT	0	0	0	tat1	TGC	0	0	0	tat1	TGT	0	0	0	tat1	TGC	0	0	0	tat1	TGC	0	0	0	tat1	CCT	0	0	0	tat1	CCA	0	0	0
tat1	TAT	0	0	0	tat1	AAA	0	0	0	tat1	AAG	0	0	0	tat1	AAG	0	0	0	tat1	CAA	0	0	0	tat1	ACC	0	0	0	tat1	TAT	0	0	0	tat1	TAT	0	0	0	tat1	AGG	0	0	0	tat1	GGG	0	0	0
tat1	TGT	0	0	0	tat1	AAG	0	0	0	tat1	AAG	0	0	0	tat1	ACT	0	0	0	tat1	GTT	0	0	0	tat1	AAA	0	0	0	tat1	TGT	0	0	0	tat1	TGT	0	0	0	tat1	ACT	0	0	0	tat1	AGT	0	0	0
tat1	AAA	0	0	0	tat1	TGT	0	0	0	tat1	CGG	0	0	0	tat1	GCT	0	0	0	tat1	TGT	0	0	0	tat1	TGC	0	0	0	tat1	AAA	0	0	0	tat1	AAA	0	0	0	tat1	CCT	0	0	0	tat1	CAG	0	0	0
tat1	AAG	0	0	0	tat1	TGC	0	0	0	tat1	GGA	0	0	0	tat1	TGT	0	0	0	tat1	TTC	0	0	0	tat1	TAT	0	0	0	tat1	AAG	0	0	0	tat1	AAG	0	0	0	tat1	TGT	0	0	0	tat1	CCT	0	0	0
tat1	TGT	0	0	0	tat1	TTT	0	0	0	tat1	CAG	0	0	0	tat1	AAC	0	0	0	tat1	ACG	0	0	0	tat1	TGC	0	0	0	tat1	TGT	0	0	0	tat1	TGC	0	0	0	tat1	AAC	0	0	0	tat1	AAG	0	0	0
tat1	TGC	0	0	0	tat1	CAT	0	0	0	tat1	CGA	0	0	0	tat1	AAT	0	0	0	tat1	AAA	0	0	0	tat1	AAA	0	0	0	tat1	TGC	0	0	0	tat1	AGC	0	0	0	tat1	AAA	0	0	0	tat1	ACC	0	0	0
tat1	TTT	0	0	0	tat1	TGC	0	0	0	tat1	CGA	0	0	0	tat1	TGC	0	0	0	tat1	AAA	0	0	0	tat1	AAG	0	0	0	tat1	TTT	0	0	0	tat1	TTT	0	0	0	tat1	TGC	0	0	0	tat1	GCT	0	0	0
tat1	CAT	0	0	0	tat1	CAA	0	0	0	tat1	AGA	0	0	0	tat1	TAT	0	0	0	tat1	GGC	0	0	0	tat1	TGT	0	0	0	tat1	CAT	0	0	0	tat1	CAT	0	0	0	tat1	TAT	0	0	0	tat1	TGT	0	0	0
tat1	TGC	0	0	0	tat1	GTT	0	0	0	tat1	GCT	0	0	0	tat1	TGT	0	0	0	tat1	TTA	0	0	0	tat1	TGC	0	0	0	tat1	TGC	0	0	0	tat1	TGC	0	0	0	tat1	TGT	0	0	0	tat1	ACC	0	0	0
tat1	CAA	0	0	0	tat1	TGC	0	0	0	tat1	GAT	0	0	0	tat1	AAA	0	0	0	tat1	GGC	0	0	0	tat1	TTT	0	0	0	tat1	CAA	0	0	0	tat1	CAA	0	0	0	tat1	AAA	0	0	0	tat1	AAT	0	0	0
tat1	GTT	0	0	0	tat1	TTC	0	0	0	tat1	CCA	0	0	0	tat1	AAG	0	0	0	tat1	ATC	0	0	0	tat1	CAC	0	0	0	tat1	GTT	0	0	0	tat1	GTT	0	0	0	tat1	AAG	0	0	0	tat1	TGC	0	0	0
tat1	TGC	0	0	0	tat1	ATA	0	0	0	tat1	GAA	0	0	0	tat1	TGT	0	0	0	tat1	TCC	0	0	0	tat1	TGT	0	0	0	tat1	TGT	0	0	0	tat1	TGT	0	0	0	tat1	TGT	0	0	0	tat1	TAT	0	0	0
tat1	TTC	0	0	0	tat1	AAA	0	0	0	tat1	GAT	0	0	0	tat1	TGC	0	0	0	tat1	TAT	0	0	0	tat1	CAA	0	0	0	tat1	TTC	0	0	0	tat1	TTC	0	0	0	tat1	TGC	0	0	0	tat1	TGT	0	0	0
tat1	ATA	0	0	0	tat1	AAG	0	0	0	tat1	CAG	0	0	0	tat1	TTT	0	0	0	tat1	GGC	0	0	0	tat1	GTT	0	0	0	tat1	ATA	0	0	0	tat1	ATA	0	0	0	tat1	TTA	0	0	0	tat1	AAA	0	0	0
tat1	ACA	0	0	0	tat1	GGC	0	0	0	tat1	GCT	0	0	0	tat1	CAT	0	0	0	tat1	AGG	0	0	0	tat1	TGC	0	0	0	tat1	ACA	0	0	0	tat1	CAA	0	0	0	tat1	CAT	0	0	0	tat1	AAG	0	0	0
tat1	AAA	0	0	0	tat1	TTA	0	0	0	tat1	CAT	0	0	0	tat1	TGC	0	0	0	tat1	AAG	0	0	0	tat1	TTC	0	0	0	tat1	AAA	0	0	0	tat1	AAA	0	0	0	tat1	TGC	0	0	0	tat1	TGT	0	0	0
tat1	GGC	0	0	0	tat1	GGC	0	0	0	tat1	CAG	0	0	0	tat1	CAA	0	0	0	tat1	AAG	0	0	0	tat1	ATA	0	0	0	tat1	GGC	0	0	0	tat1	GGC	0	0	0	tat1	CAA	0	0	0	tat1	TGC	0	0	0
tat1	TTA	0	0	0	tat1	ATC	0	0	0	tat1	ACT	0	0	0	tat1	AAG	0	0	0	tat1	CGG	0	0	0	tat1	ACA	0	0	0	tat1	TTA	0	0	0	tat1	TTA	0	0	0	tat1	GTT	0	0	0	tat1	CTT	0	0	0
tat1	GGC	0	0	0	tat1	TCC	0	0	0	tat1	TCT	0	0	0	tat1	TGT	0	0	0	tat1	AGA	0	0	0	tat1	AAA	0	0	0	tat1	GGC	0	0	0	tat1	GGC	0	0	0	tat1	TGC	0	0	0	tat1	CAT	0	0	0
tat1	ATC	0	0	0	tat1	TAT	0	0	0	tat1	CTA	0	0	0	tat1	TTC	0	0	0	tat1	CAG	0	0	0	tat1	GGC	0	0	0	tat1	ATC	0	0	0	tat1	ATC	0	0	0	tat1	TTC	0	0	0	tat1	TGC	0	0	0
tat1	TCC	0	0	0	tat1	GGC	0	0	0	tat1	CCA	0	0	0	tat1	ACA	0	0	0	tat1	CGA	0	0	0	tat1	TTA	0	0	0	tat1	TCC	0	0	0	tat1	TCC	0	0	0	tat1	ATA	0	0	0	tat1	CAA	0	0	0
tat1	TAT	0	0	0	tat1	AGG	0	0	0	tat1	AAG	0	0	0	tat1	CAA	0	0	0	tat1	CGA	0	0	0	tat1	GGC	0	0	0	tat1	TAT	0	0	0	tat1	TAT	0	0	0	tat1	AAG	0	0	0	tat1	GTT	0	0	0
tat1	GGC	0	0	0	tat1	AAG	0	0	0	tat1	CAG	0	0	0	tat1	AAA	0	0	0	tat1	CGA	0	0	0	tat1	ATC	0	0	0	tat1	GGC	0	0	0	tat1	GGC	0	0	0	tat1	AAA	0	0	0	tat1	TGT	0	0	0
tat1	AGG	0	0	0	tat1	AAG	0	0	0	rev1	ATG	0	0	0	tat1	GGC	0	0	0	tat1	GCT	0	0	0	tat1	TCC	0	0	0	tat1	AGG	0	0	0	tat1	AGG	0	0	0	tat1	GGC	0	0	0	tat1	TTC	0	0	0
tat1	AAG	0	0	0	tat1	CGG	0	0	0	rev1	GCA	0	0	0	tat1	TTA	0	0	0	tat1	CCT	0	0	0	tat1	TAT	0	0	0	tat1	AAG	0	0	0	tat1	AAG	0	0	0	tat1	TTA	0	0	0	tat1	ACA	0	0	0
tat1	AAG	0	0	0	tat1	AGA	0	0	0	rev1	GGA	0	0	0	tat1	GGC	0	0	0	tat1	GAA	0	0	0	tat1	GGC	0	0	0	tat1	AAG	0	0	0	tat1	AAG	0	0	0	tat1	GGC	0	0	0	tat1	AAA	0	0	0
tat1	CGG	0	0	0	tat1	CAG	0	0	0	rev1	AGA	0	0	0	tat1	ATC	0	0	0	tat1	GAC	0	0	0	tat1	AGG	0	0	0	tat1	CGG	0	0	0	tat1	CGG	0	0	0	tat1	ATC	0	0	0	tat1	AAG	0	0	0
tat1	AGA	0	0	0	tat1	CGA	0	0	0	rev1	AGC	0	0	0	tat1	TCC	0	0	0	tat1	AGT	0	0	0	tat1	AAG	0	0	0	tat1	AGA	0	0	0	tat1	AGA	0	0	0	tat1	TCC	0	0	0	tat1	GGC	0	0	0
tat1	CAG	0	0	0	tat1	CGA	0	0	0	rev1	GGG	0	0	0	tat1	TAT	0	0	0	tat1	CAG	0	0	0	tat1	AAG	0	0	0	tat1	CAG	0	0	0	tat1	CAG	0	0	0	tat1	TAT	0	0	0	tat1	TTA	0	0	0
tat1	CGA	0	0	0	tat1	AGA	0	0	0	rev1	GAC	0	0	0	tat1	GGC	0	0	0	tat1	ACT	0	0	0	tat1	CGG	0	0	0	tat1	CGA	0	0	0	tat1	CGA	0	0	0	tat1	GGC	0	0	0	tat1	GGC	0	0	0
tat1	CGA	0	0	0	tat1	CCT	0	0	0	rev1	AGC	0	0	0	tat1	AGG	0	0	0	tat1	CAT	0	0	0	tat1	AGA	0	0	0	tat1	CGA	0	0	0	tat1	CGA	0	0	0	tat1	AGG	0	0	0	tat1	ATT	0	0	0
tat1	AGA	0	0	0	tat1	CCT	0	0	0	rev1	GAC	0	0	0	tat1	AAG	0	0	0	tat1	CAA	0	0	0	tat1	CAG	0	0	0	tat1	AGA	0	0	0	tat1	AGA	0	0	0	tat1	AAG	0	0	0	tat1	TCC	0	0	0
tat1	GCT	0	0	0	tat1	CAA	1	0	0	rev1	GAA	0	0	0	tat1	AAG	0	0	0	tat1	GCG	0	0	0	tat1	CGA	0	0	0	tat1	CCT	0	0	0	tat1	GCT	0	0	0	tat1	AAG	0	0	0	tat1	TAT	0	0	0
tat1	CCT	0	0	0	tat1	GAC	0	0	0	rev1	GAG	0	0	0	tat1	CGG	0	0	0	tat1	TCT	0	0	0	tat1	CGA	0	0	0	tat1	CCT	0	0	0	tat1	CCT	0	0	0	tat1	CGG	0	0	0	tat1	GGC	0	0	0
tat1	CAA	0	0	0	tat1	AGT	0	0	0	rev1	CTG	0	0	0	tat1	AGA	0	0	0	tat1	CTA	0	0	0	tat1	CGA	0	0	0	tat1	CCA	0	0	0	tat1	CAG	0	0	0	tat1	AGA	0	0	0	tat1	AGG	0	0	0
tat1	GGT	0	0	0	tat1	CAG	0	0	0	rev1	ATC	0	0	0	tat1	CAG	0	0	0	tat1	TCA	0	0	0	tat1	GCT	0	0	0	tat1	GAC	0	0	0	tat1	GAC	0	0	0	tat1	CAG	0	0	0	tat1	AAG	0	0	0
tat1	AGT	0	0	0	tat1	ACT	0	0	0	rev1	CAG	0	0	0	tat1	CGA	0	0	0	tat1	GAG	0	0	0	tat1	CCT	0	0	0	tat1	AGT	0	0	0	tat1	AAT	0	0	0	tat1	CGA	0	0	0	tat1	AAG	0	0	0
tat1	CCG	0	0	0	tat1	CAT	0	0	0	rev1	AAG	0	0	0	tat1	CGG	0	0	0	tat1	CAG	0	0	0	tat1	CAG	0	0	0	tat1	CAG	0	0	0	tat1	CAG	0	0	0	tat1	CGA	0	0	0	tat1	CGG	0	0	0
tat1	ACT	0	0	0	tat1	CAA	0	0	0	rev1	ATC	0	0	0	tat1	AGA	0	0	0	rev1	ATG	0	0	0	tat1	GGC	0	0	0	tat1	GAT	0	0	0	tat1	ACT	0	0	0	tat1	GGA	0	0	0	tat1	AGA	0	0	0
tat1	CAT	0	0	0	tat1	GCT	0	0	0	rev1	AGG	0	0	0	tat1	GCT	0	0	0	rev1	GCA	0	0	0	tat1	AGT	0	0	0	tat1	CAT	0	0	0	tat1	CAT	0	0	0	tat1	CCT	0	0	0	tat1	CAG	0	0	0
tat1	CAA	0	0	0	tat1	TCT	0	0	0	rev1	CTC	0	0	0	tat1	CCT	0	0	0	rev1	GGA	0	0	0	tat1	CAG	0	0	0	tat1	CAA	0	0	0	tat1	CAG	0	0	0	tat1	CCT	0	0	0	tat1	CGA	0	0	0
tat1	GTC	0	0	0	tat1	CTA	0	0	0	rev1	ATC	0	0	0	tat1	CCT	0	0	0	rev1	AGA	0	0	0	tat1	ACT	0	0	0	tat1	GTT	0	0	0	tat1	GAT	0	0	0	tat1	CAA	0	0	0	tat1	AGA	0	0	0
tat1	TCT	0	0	0	tat1	TCA	0	0	0	rev1	AGA	0	0	0	tat1	GAC	0	0	0	rev1	AGC	0	0	0	tat1	GAT	0	0	0	tat1	CCT	0	0	0	tat1	TAT	0	0	0	tat1	GAC	0	0	0	tat1	AGA	0	0	0
tat1	CTA	0	0	0	tat1	AAG	0	0	0	rev1	CTT	0	0	0	tat1	AGT	0	0	0	rev1	GGA	0	0	0	tat1	CAA	0	0	0	tat1	CTA	0	0	0	tat1	CTA	0	0	0	tat1	AGT	0	0	0	tat1	GCT	0	0	0
tat1	TCA	0	0	0	tat1	CAG	0	0	0	rev1	CTC	0	0	0	tat1	CAG	0	0	0	rev1	GAC	0	0	0	tat1	GGA	0	0	0	tat1	TCA	0	0	0	tat1	TCA	0	0	0	tat1	CAG	0	0	0	tat1	GAT	0	0	0
tat1	AAA	0	0	0	rev1	ATG	0	0	0	rev1	TAC	0	0	0	tat1	AAT	0	0	0	rev1	AGC	0	0	0	tat1	TCT	0	0	0	tat1	AAG	0	0	0	tat1	AAG	0	0	0	tat1	ACT	0	0	0	tat1	CAA	0	0	0
tat1	CAG	0	0	0	rev1	GCA	0	0	0	rev1	CAA	0	0	0	tat1	CAT	0	0	0	rev1	GAC	0	0	0	tat1	CCA	0	0	0	tat1	CAG	0	0	0	tat1	CAG	0	0	0	tat1	CAT	0	0	0	tat1	GAC	0	0	0
rev1	ATG	0	0	0	rev1	GGA	0	0	0	rev1	AGC	0	0	0	tat1	CAA	0	0	0	rev1	GAC	0	0	0	tat1	TCA	0	0	0	rev1	ATG	0	0	0	rev1	ATG	0	0	0	tat1	CAA	0	0	0	tat1	AGT	0	0	0
rev1	GCA	0	0	0	rev1	AGA	0	0	0	rev1	AGT	0	0	0	tat1	GTT	0	0	0	rev1	GAG	0	0	0	tat1	AAG	0	0	0	rev1	GCA	0	0	0	rev1	GCA	0	0	0	tat1	GTC	0	0	0	tat1	CAG	0	0	0
rev1	GGA	0	0	0	rev1	AGC	0	0	0	vpu	ATG	0	0	0	tat1	GCT	0	0	0	rev1	CTC	0	0	0	tat1	CAG	0	0	0	rev1	GGA	0	0	0	rev1	GGA	0	0	0	tat1	TCT	0	0	0	tat1	ACT	0	0	0
rev1	AGA	0	0	0	rev1	GGA	0	0	0	vpu	CAT	0	0	0	tat1	CTA	0	0	0	rev1	CTG	0	0	0	rev1	ATG	0	0	0	rev1	AGA	0	0	0	rev1	AGA	0	0	0	tat1	CTA	0	0	0	tat1	CAT	0	0	0
rev1	AGC	0	0	0	rev1	GAC	0	0	0	vpu	ACT	0	0	0	tat1	TCA	0	0	0	rev1	AAG	0	0	0	rev1	GCA	0	0	0	rev1	AGC	0	0	0	rev1	AGC	0	0	0	tat1	TCA	0	0	0	tat1	CAA	0	0	0
rev1	GGA	0	0	0	rev1	AGC	0	0	0	vpu	GAA	0	0	0	tat1	AAG	0	0	0	rev1	ACA	0	0	0	rev1	GGA	0	0	0	rev1	GGA	0	0	0	rev1	GGA	0	0	0	tat1	AAG	0	0	0	tat1	GCG	0	0	0
rev1	GAC	0	0	0	rev1	GAC	0	0	0	vpu	GTA	0	0	0	tat1	CAG	0	0	0	rev1	GTC	0	0	0	rev1	AGA	0	0	0	rev1	GAC	0	0	0	rev1	GAC	0	0	0	tat1	CAG	0	0	0	tat1	TCT	0	0	0
rev1	AGC	0	0	0	rev1	GAA	0	0	0	vpu	GTA	0	0	0	rev1	ATG	0	0	0	rev1	AGA	0	0	0	rev1	AGC	0	0	0	rev1	AGC	0	0	0	rev1	AGC	0	0	0	rev1	ATG	0	0	0	tat1	CTA	0	0	0
rev1	GAC	0	0	0	rev1	GAC	0	0	0	vpu	TTA	0	0	0	rev1	GCA	0	0	0	rev1	CTC	0	0	0	rev1	GGA	0	0	0	rev1	GAC	0	0	0	rev1	GAC	0	0	0	rev1	GCA	0	0	0	tat1	CCA	0	0	0
rev1	GAA	0	0	0	rev1	CTC	0	0	0	vpu	GCA	0	0	0	rev1	GGA	0	0	0	rev1	ATC	0	0	0	rev1	GAC	0	0	0	rev1	GAA	0	0	0	rev1	GAA	0	0	0	rev1	GGA	0	0	0	tat1	AAG	0	0	0
rev1	GAG	0	0	0	rev1	CTC	0	0	0	vpu	ATA	0	0	0	rev1	AGA	0	0	0	rev1	AAG	0	0	0	rev1	AGC	0	0	0	rev1	GAC	0	0	0	rev1	GAG	0	0	0	rev1	AGA	0	0	0	tat1	CAG	0	0	0
rev1	CTC	0	0	0	rev1	AAG	0	0	0	vpu	GTA	0	0	0	rev1	AGC	0	0	0	rev1	CGT	0	0	0	rev1	GAC	0	0	0	rev1	CTC	0	0	0	rev1	CTC	0	0	0	rev1	AGC	0	0	0	rev1	ATG	0	0	0
rev1	CTC	0	0	0	rev1	ACA	0	0	0	vpu	GCA	0	0	0	rev1	GGA	0	0	0	rev1	CTC	0	0	0	rev1	GAC	0	0	0	rev1	CTC	0	0	0	rev1	CTC	0	0	0	rev1	GGA	0	0	0	rev1	GCA	0	0	0
rev1	AAG	0	0	0	rev1	GTC	0	0	0	vpu	TTA	0	0	0	rev1	GAC	0	0	0	rev1	TAT	0	0	0	rev1	GAG	0	0	0	rev1	CAG	0	0	0	rev1	AGG	0	0	0	rev1	GAC	0	0	0	rev1	GGA	0	0	0
rev1	GTA	0	0	0	rev1	AGA	0	0	0	vpu	GTA	0	0	0	rev1	AGC	0	0	0	rev1	CAG	0	0	0	rev1	CTC	0	0	0	rev1	ACA	0	0	0	rev1	ACA	0	0	0	rev1	AGC	0	0	0	rev1	AGA	0	0	0
rev1	GTC	0	0	0	rev1	CTC	0	0	0	vpu	GTA	0	0	0	rev1	GAC	0	0	0	rev1	AGC	0	0	0	rev1	CTC	0	0	0	rev1	GTC	0	0	0	rev1	ATC	0	0	0	rev1	GAC	0	0	0	rev1	AGC	0	0	0
rev1	CGA	0	0	0	rev1	ATC	0	0	0	vpu	GTA	0	0	0	rev1	GGA	0	0	0	rev1	AGT	0	0	0	rev1	AGG	0	0	0	rev1	AGG	0	0	0	rev1	AGA	0	0	0	rev1	GAG	0	0	0	rev1	GGA	0	0	0
rev1	CTC	0	0	0	rev1	AAG	0	0	0	vpu	GCA	0	0	0	rev1	GAG	0	0	0	vpu	ATG	0	0	0	rev1	GCA	0	0	0	rev1	ATC	0	0	0	rev1	CTC	0	0	0	rev1	GAC	0	0	0	rev1	GAC	0	0	0
rev1	ATC	0	0	0	rev1	CTT	0	0	0	vpu	ATA	0	0	0	rev1	CTC	0	0	0	vpu	AAC	0	0	0	rev1	GTC	0	0	0	rev1	ATC	0	0	0	rev1	ATC	0	0	0	rev1	CTC	0	0	0	rev1	AGC	0	0	0
rev1	AAG	0	0	0	rev1	CTC	0	0	0	vpu	ATA	0	0	0	rev1	CTC	0	0	0	vpu	TCT	0	0	0	rev1	AGA	0	0	0	rev1	AAG	0	0	0	rev1	AGG	0	0	0	rev1	CTC	0	0	0	rev1	GAA	0	0	0
rev1	TCT	0	0	0	rev1	TAT	0	0	0	vpu	GCA	0	0	0	rev1	CTG	0	0	0	vpu	TTA	0	0	0	rev1	CTG	0	0	0	rev1	TTC	0	0	0	rev1	ATT	0	0	0	rev1	AAG	0	0	0	rev1	GAA	0	0	0
rev1	CTC	0	0	0	rev1	CAA	0	0	0	vpu	ATA	0	0	0	rev1	ACA	0	0	0	vpu	ACG	0	0	0	rev1	ATC	0	0	0	rev1	CTC	0	0	0	rev1	ATC	0	0	0	rev1	ACA	0	0	0	rev1	GAG	0	0	0
rev1	TAT	0	0	0	rev1	AGC	0	0	0	vpu	GTT	0	0	0	rev1	GTC	0	0	0	vpu	ATA	0	0	0	rev1	AAG	0	0	0	rev1	TAT	0	0	0	rev1	TAT	0	0	0	rev1	GTC	0	0	0	rev1	CTG	0	0	0
rev1	CAA	0	0	0	rev1	AGT	0	0	0	vpu	GTG	0	0	0	rev1	AGA	0	0	0	vpu	GCA	0	0	0	rev1	GAT	0	0	0	rev1	CAA	0	0	0	rev1	CAA	0	0	0	rev1	AGA	0	0	0	rev1	ATC	0	0	0
rev1	AAC	0	0	0	vpu	ATG	0	0	0	vpu	TGG	1	2	1	rev1	ATC	0	0	0	vpu	TCA	0	0	0	rev1	CTC	0	0	0	rev1	AGC	0	0	0	rev1	AGC	0	0	0	rev1	CTC	0	0	0	rev1	AAG	0	0	0
rev1	AGT	0	0	0	vpu	CAA	0	0	0	vpu	ACC	0	0	0	rev1	ATC	0	0	0	vpu	ATA	0	0	0	rev1	CAT	0	0	0	rev1	AGT	0	0	0	rev1	AGT	0	0	0	rev1	ATC	0	0	0	rev1	ACA	0	0	0
vpu	ATG	0	0	0	vpu	TCT	0	0	0	vpu	ATA	0	0	0	rev1	AAG	0	0	0	vpu	GTA	0	0	0	rev1	CAA	0	0	0	vpu	ATG	0	0	0	vpu	ATG	0	0	0	rev1	AAG	0	0	0	rev1	GTC	0	0	0
vpu	CAA	0	0	0	vpu	TTA	0	0	0	vpu	GTA	0	0	0	rev1	TTG	0	0	0	vpu	GCA	0	0	0	rev1	AGC	0	0	0	vpu	CAA	0	0	0	vpu	CAA	0	0	0	rev1	TCT	0	0	0	rev1	AGA	0	0	0
vpu	TCT	0	0	0	vpu	GCA	0	0	0	vpu	TTA	0	0	0	rev1	CTC	0	0	0	vpu	TTA	0	0	0	rev1	AGT	0	0	0	vpu	TCT	0	0	0	vpu	GCT	0	0	0	rev1	CTC	0	0	0	rev1	CTC	0	0	0
vpu	TTA	0	0	0	vpu	ATA	0	0	0	vpu	CTA	0	0	0	rev1	TAT	0	0	0	vpu	GTA	0	0	0	vpu	ATG	0	0	0	vpu	TTA	0	0	0	vpu	TTA	0	0	0	rev1	TAT	0	0	0	rev1	ATC	0	0	0
vpu	GTA	0	0	0	vpu	TTA	0	0	0	vpu	GAA	0	0	0	rev1	CAA	0	0	0	vpu	GTA	0	0	0	vpu	CAA	0	0	0	vpu	GTA	0	0	0	vpu	GTA	0	0	0	rev1	CAA	0	0	0	rev1	AAG	0	0	0
vpu	ATA	0	0	0	vpu	TCA	0	0	0	vpu	TAT	0	0	0	rev1	AGC	0	0	0	vpu	GTA	0	0	0	vpu	TCT	0	0	0	vpu	ATA	0	0	0	vpu	ATA	0	0	0	rev1	AGC	0	0	0	rev1	CGT	0	0	0
vpu	GGA	0	0	0	vpu	ATA	0	0	0	vpu	AGG	0	0	0	rev1	AGT	0	0	0	vpu	ACA	0	0	0	vpu	TTA	0	0	0	vpu	TTA	0	0	0	vpu	TTA	0	0	0	rev1	AGT	0	0	0	rev1	CTC	0	0	0
vpu	TCA	0	0	0	vpu	GTA	0	0	0	vpu	AAA	0	0	0	vpu	ATG	0	0	0	vpu	ATA	0	0	0	vpu	CAA	0	0	0	vpu	GCA	0	0	0	vpu	GCA	0	0	0	vpu	ATG	0	0	0	rev1	TAC	0	0	0
vpu	ATA	0	0	0	vpu	GCA	0	0	0	vpu	ATA	0	0	0	vpu	CAA	0	0	0	vpu	ATA	0	0	0	vpu	ATA	0	0	0	vpu	ATA	0	0	0	vpu	ATA	0	0	0	vpu	CAA	0	0	0	rev1	CAA	0	0	0
vpu	GTA	0	0	0	vpu	TTA	0	0	0	vpu	TTA	0	0	0	vpu	CCT	0	0	0	vpu	GCA	0	0	0	vpu	TTA	0	0	0	vpu	ATA	0	0	0	vpu	GTA	0	0	0	vpu	TCT	0	0	0	rev1	AGC	0	0	0
vpu	GCA	0	0	0	vpu	GTA	0	0	0	vpu	AGA	0	0	0	vpu	TTA	0	0	0	vpu	ATA	0	0	0	vpu	GCA	0	0	0	vpu	TCA	0	0	0	vpu	GCA	0	0	0	vpu	TTA	0	0	0	rev1	AGT	0	0	0
vpu	TTA	0	0	0	vpu	GTA	0	0	0	vpu	CAA	0	0	0	vpu	GTA	0	0	0	vpu	GTT	0	0	0	vpu	ATT	0	0	0	vpu	TTA	0	0	0	vpu	TTG	0	0	0	vpu	CAA	0	0	0	vpu	ATG	0	0	0
vpu	GTG	0	0	0	vpu	GCA	0	0	0	vpu	AGA	0	0	0	vpu	ATA	0	0	0	vpu	GTG	0	0	0	vpu	GTA	0	0	0	vpu	GTA	0	0	0	vpu	GTA	0	0	0	vpu	ATA	0	0	0	vpu	CAA	0	0	0
vpu	GTA	0	0	0	vpu	GCA	0	0	0	vpu	AAG	0	0	0	vpu	GTA	0	0	0	vpu	TGG	0	0	0	vpu	GCA	0	0	0	vpu	GTA	0	0	0	vpu	GTA	0	0	0	vpu	TTA	0	0	0	vpu	CCT	0	0	0
vpu	GTA	0	0	0	vpu	ATA	0	0	0	vpu	ATA	0	0	0	vpu	GCA	0	0	0	vpu	TCT	0	0	0	vpu	TTA	0	0	0	vpu	GTA	0	0	0	vpu	GCA	0	0	0	vpu	GCA	0	0	0	vpu	TTG	0	0	0
vpu	GCA	0	0	0	vpu	ATA	0	0	0	vpu	GAC	0	0	0	vpu	ATA	0	0	0	vpu	ATA	0	0	0	vpu	GTA	0	0	0	vpu	GCA	0	0	0	vpu	GCA	0	0	0	vpu	ATA	0	0	0	vpu	CAA	0	0	0
vpu	ATA	0	0	0	vpu	GCA	0	0	0	vpu	AGG	0	0	0	vpu	GTA	0	0	0	vpu	GTA	0	0	0	vpu	GTA	0	0	0	vpu	ATA	0	0	0	vpu	ATA	0	0	0	vpu	GTA	0	0	0	vpu	ATA	0	0	0
vpu	ATA	0	0	0	vpu	ATA	0	0	0	vpu	TTA	0	0	0	vpu	GCA	0	0	0	vpu	TTC	0	0	0	vpu	GCA	0	0	0	vpu	ATA	0	0	0	vpu	CTA	0	0	0	vpu	GCA	0	0	0	vpu	GTA	0	0	0
vpu	GCA	0	0	0	vpu	GTT	0	0	0	vpu	ATT	0	0	0	vpu	TTA	0	0	0	vpu	ATA	0	0	0	vpu	GCA	0	0	0	vpu	GCA	0	0	0	vpu	GCA	0	0	0	vpu	TTA	0	0	0	vpu	GCA	0	0	0
vpu	ATA	0	0	0	vpu	GTG	0	0	0	vpu	GAA	0	0	0	vpu	GTA	0	0	0	vpu	GAA	0	0	0	vpu	ATA	0	0	0	vpu	ATA	0	0	0	vpu	ATA	0	0	0	vpu	GTA	0	0	0	vpu	ATA	0	0	0
vpu	ATT	0	0	0	vpu	TGG	0	0	0	vpu	AGA	0	0	0	vpu	GTA	0	0	0	vpu	TAT	0	0	0	vpu	TTA	0	0	0	vpu	GTT	0	0	0	vpu	GTT	0	0	0	vpu	GTA	0	0	0	vpu	GCA	0	0	0
vpu	GTG	0	0	0	vpu	ACC	0	0	0	vpu	ATC	0	0	0	vpu	GTA	0	0	0	vpu	AGG	0	0	0	vpu	GTA	0	0	0	vpu	ATA	0	0	0	vpu	GTG	0	0	0	vpu	GGA	0	0	0	vpu	GCA	0	0	0
vpu	TGG	0	4	0	vpu	ATA	0	0	0	vpu	AGT	0	0	0	vpu	GCA	0	0	0	vpu	AAA	0	0	0	vpu	ATA	0	0	0	vpu	TGG	0	0	0	vpu	TGG	0	5	0	vpu	GCA	0	0	0	vpu	TTA	0	0	0
vpu	TCC	0	0	0	vpu	GTA	0	0	0	vpu	GAA	0	0	0	vpu	ATA	0	0	0	vpu	ATA	0	0	0	vpu	GTG	0	0	0	vpu	GCT	0	0	0	vpu	ACT	0	0	0	vpu	ATA	0	0	0	vpu	GTA	0	0	0
vpu	ATA	0	0	0	vpu	TAC	0	0	0	vpu	AGA	0	0	0	vpu	CTA	0	0	0	vpu	TTA	0	0	0	vpu	GTG	0	0	0	vpu	ATA	0	0	0	vpu	ATA	0	0	0	vpu	ATA	0	0	0	vpu	GTT	0	0	0
vpu	GTC	0	0	0	vpu	ATA	0	0	0	vpu	GCA	0	0	0	vpu	GCA	0	0	0	vpu	AAA	0	0	0	vpu	TGG	0	1	0	vpu	GTG	0	0	0	vpu	GTA	0	0	0	vpu	GCA	0	0	0	vpu	GTA	0	0	0
vpu	TTC	0	0	0	vpu	GAA	0	0	0	vpu	GAA	0	0	0	vpu	ATA	0	0	0	vpu	CAA	0	0	0	vpu	TCT	0	0	0	vpu	CTT	0	0	0	vpu	TTC	0	0	0	vpu	ATA	0	0	0	vpu	ACA	0	0	0
vpu	ATA	0	0	0	vpu	TAT	0	0	0	vpu	GAC	0	0	0	vpu	ATT	0	0	0	vpu	AGG	0	0	0	vpu	ATA	0	0	0	vpu	ATA	0	0	0	vpu	ATA	0	0	0	vpu	GTT	0	0	0	vpu	ATA	0	0	0
vpu	GAA	0	0	0	vpu	AGG	0	0	0	vpu	AGT	0	0	0	vpu	GTG	0	0	0	vpu	AAA	0	0	0	vpu	GTA	0	0	0	vpu	GAA	0	0	0	vpu	GAA	0	0	0	vpu	GTG	0	0	0	vpu	ATA	0	0	0
vpu	TAT	0	0	0	vpu	AAA	0	0	0	vpu	GGC	0	0	0	vpu	TGG	0	0	0	vpu	ATA	0	0	0	vpu	TTC	0	0	0	vpu	TAT	0	0	0	vpu	TAT	0	0	0	vpu	TGG	0	1	0	vpu	GCA	0	0	0
vpu	AGG	0	0	0	vpu	ATA	0	0	0	vpu	AAT	0	0	0	vpu	TCC	0	0	0	vpu	GAC	0	0	0	vpu	ATA	0	0	0	vpu	AGG	0	0	0	vpu	AGG	0	0	0	vpu	ACC	0	0	0	vpu	ATA	0	0	0
vpu	AAA	0	0	0	vpu	TTA	0	0	0	vpu	GAG	0	0	0	vpu	ATA	0	0	0	vpu	AAG	0	0	0	vpu	GAA	0	0	0	vpu	AAA	0	0	0	vpu	AAA	0	0	0	vpu	ATA	0	0	0	vpu	GTT	0	0	0
vpu	ATA	0	0	0	vpu	AGA	0	0	0	vpu	AGT	0	0	0	vpu	GTA	0	0	0	vpu	TTA	0	0	0	vpu	TAT	0	0	0	vpu	ATA	0	0	0	vpu	ATA	0	0	0	vpu	GTA	0	0	0	vpu	GTG	0	0	0
vpu	TTA	0	0	0	vpu	CAA	0	0	0	vpu	GAA	0	0	0	vpu	CTC	0	0	0	vpu	ATT	0	0	0	vpu	AGG	0	0	0	vpu	TTA	0	0	0	vpu	TTA	0	0	0	vpu	TTC	0	0	0	vpu	TGG	0	1	0
vpu	AGA	0	0	0	vpu	AGG	0	0	0	vpu	GGA	0	0	0	vpu	ATA	0	0	0	vpu	GAG	0	0	0	vpu	AAA	0	0	0	vpu	AGA	0	0	0	vpu	AGA	0	0	0	vpu	ATA	0	0	0	vpu	TCC	0	0	0
vpu	CAA	0	0	0	vpu	GAA	0	0	0	vpu	GAC	0	0	0	vpu	GAA	0	0	0	vpu	AGA	0	0	0	vpu	ATA	0	0	0	vpu	CAA	0	0	0	vpu	CAA	0	0	0	vpu	GAA	0	0	0	vpu	ATA	0	0	0
vpu	AGA	0	0	0	vpu	ATA	0	0	0	vpu	CAA	0	0	0	vpu	TAT	0	0	0	vpu	ATA	0	0	0	vpu	TTA	0	0	0	vpu	AGG	0	0	0	vpu	AGG	0	0	0	vpu	TAT	0	0	0	vpu	GTA	0	0	0
vpu	AAA	0	0	0	vpu	AAT	0	0	0	vpu	GAA	0	0	0	vpu	AGG	0	0	0	vpu	AGA	0	0	0	vpu	AGA	0	0	0	vpu	AAA	0	0	0	vpu	AAA	0	0	0	vpu	AGA	0	0	0	vpu	CTC	0	0	0
vpu	ATA	0	0	0	vpu	AGA	0	0	0	vpu	GAA	0	0	0	vpu	AAA	0	0	0	vpu	GAA	0	0	0	vpu	CAA	0	0	0	vpu	ATA	0	0	0	vpu	ATA	0	0	0	vpu	AAA	0	0	0	vpu	ATA	0	0	0
vpu	GAT	0	0	0	vpu	TTA	0	0	0	vpu	CTA	0	0	0	vpu	ATA	0	0	0	vpu	AGA	0	0	0	vpu	AGA	0	0	0	vpu	GAT	0	0	0	vpu	GAC	0	0	0	vpu	ATA	0	0	0	vpu	GAA	0	0	0
vpu	AGG	0	0	0	vpu	ATT	0	0	0	vpu	TCA	0	0	0	vpu	TTA	0	0	0	vpu	GCA	0	0	0	vpu	AAA	0	0	0	vpu	AGG	0	0	0	vpu	AGG	0	0	0	vpu	TTA	0	0	0	vpu	TAT	0	0	0
vpu	TTA	0	0	0	vpu	GAT	0	0	0	vpu	GCC	0	0	0	vpu	AGA	0	0	0	vpu	GAA	0	0	0	vpu	ATA	0	0	0	vpu	TTA	0	0	0	vpu	TTG	0	0	0	vpu	AGA	0	0	0	vpu	AGG	0	0	0
vpu	ATT	0	0	0	vpu	AGA	0	0	0	vpu	CTT	0	0	0	vpu	CAA	0	0	0	vpu	GAC	0	0	0	vpu	GAT	0	0	0	vpu	ATT	0	0	0	vpu	CTT	0	0	0	vpu	CAA	0	0	0	vpu	AGA	0	0	0
vpu	GAT	0	0	0	vpu	ATA	0	0	0	vpu	ATG	0	0	0	vpu	AGA	0	0	0	vpu	AGT	0	0	0	vpu	AGG	0	0	0	vpu	GAT	0	0	0	vpu	GAT	0	0	0	vpu	AGA	0	0	0	vpu	ATA	0	0	0
vpu	AGA	0	0	0	vpu	AGA	0	0	0	vpu	GAC	0	0	0	vpu	AAA	0	0	0	vpu	GGC	0	0	0	vpu	CTA	0	0	0	vpu	AGG	0	0	0	vpu	AGA	0	0	0	vpu	AAA	0	0	0	vpu	TTA	0	0	0
vpu	ATA	0	0	0	vpu	GAA	0	0	0	vpu	AGG	0	0	0	vpu	ATA	0	0	0	vpu	AAT	0	0	0	vpu	ATT	0	0	0	vpu	ATA	0	0	0	vpu	ATA	0	0	0	vpu	ATA	0	0	0	vpu	AGG	0	0	0
vpu	AGA	0	0	0	vpu	AGA	0	0	0	vpu	GGG	0	0	0	vpu	GAT	0	0	0	vpu	GAG	0	0	0	vpu	GAT	0	0	0	vpu	ATA	0	0	0	vpu	AGT	0	0	0	vpu	GAC	0	0	0	vpu	CAA	0	0	0
vpu	GAA	0	0	0	vpu	GCA	0	0	0	vpu	CAT	0	0	0	vpu	AAA	0	0	0	vpu	AGT	0	0	0	vpu	AGA	0	0	0	vpu	GAA	0	0	0	vpu	GAA	0	0	0	vpu	AGG	0	0	0	vpu	AGA	0	0	0
vpu	AGA	0	0	0	vpu	GAA	0	0	0	vpu	CTT	0	0	0	vpu	ATA	0	0	0	vpu	GAT	0	0	0	vpu	ATA	0	0	0	vpu	AGA	0	0	0	vpu	AGA	0	0	0	vpu	TTA	0	0	0	vpu	AAA	0	0	0
vpu	GCA	0	0	0	vpu	GAC	0	0	0	vpu	GCT	0	0	0	vpu	ATT	0	0	0	vpu	GGA	0	0	0	vpu	GCA	0	0	0	vpu	GCA	0	0	0	vpu	GCA	0	0	0	vpu	CTT	0	0	0	vpu	ATA	0	0	0
vpu	GAG	0	0	0	vpu	AGT	0	0	0	vpu	CCT	0	0	0	vpu	GAT	0	0	0	vpu	GAT	0	0	0	vpu	GAA	0	0	0	vpu	GAA	0	0	0	vpu	GAA	0	0	0	vpu	GAA	0	0	0	vpu	GAT	0	0	0
vpu	GAC	0	0	0	vpu	GGC	0	0	0	vpu	TGG	0	4	0	vpu	AGA	0	0	0	vpu	CAG	0	0	0	vpu	AGA	0	0	0	vpu	GAC	0	0	0	vpu	GAC	0	0	0	vpu	AGA	0	0	0	vpu	AGG	0	0	0
vpu	AGT	0	0	0	vpu	AAT	0	0	0	vpu	AAT	0	0	0	vpu	ATA	0	0	0	vpu	GAG	0	0	0	vpu	GCA	0	0	0	vpu	AGT	0	0	0	vpu	AGT	0	0	0	vpu	ATA	0	0	0	vpu	ATA	0	0	0
vpu	GGC	0	0	0	vpu	GAA	0	0	0	vpu	GTT	0	0	0	vpu	AGA	0	0	0	vpu	GAA	0	0	0	vpu	GAA	0	0	0	vpu	GGC	0	0	0	vpu	GGC	0	0	0	vpu	ATT	0	0	0	vpu	ATT	0	0	0
vpu	AAT	0	0	0	vpu	AGT	0	0	0	vpu	GAT	0	0	0	vpu	GAA	0	0	0	vpu	TTG	0	0	0	vpu	GAT	0	0	0	vpu	AAT	0	0	0	vpu	AAT	0	0	0	vpu	GAA	0	0	0	vpu	GAT	0	0	0
vpu	GAG	0	0	0	vpu	GAT	0	0	0	vpu	GAT	0	0	0	vpu	AGA	0	0	0	vpu	GCA	0	0	0	vpu	AGT	0	0	0	vpu	GAG	0	0	0	vpu	GAC	0	0	0	vpu	AGA	0	0	0	vpu	AGA	0	0	0
vpu	AGT	0	0	0	vpu	GGG	0	0	0	vpu	CTG	0	0	0	vpu	GCA	0	0	0	vpu	GCA	0	0	0	vpu	GGC	0	0	0	vpu	AGT	0	0	0	vpu	AGT	0	0	0	vpu	GCA	0	0	0	vpu	ATA	0	0	0
vpu	GAA	0	0	0	vpu	GAC	0	0	0	vpu	TAG	0	0	0	vpu	GAA	0	0	0	vpu	CTT	0	0	0	vpu	AAT	0	0	0	vpu	GAA	0	0	0	vpu	GAA	0	0	0	vpu	GAA	0	0	0	vpu	AGA	0	0	0
vpu	GGA	0	0	0	vpu	CAG	0	0	0	env	ATG	0	0	0	vpu	GAC	0	0	0	vpu	GTG	0	0	0	vpu	GAA	0	0	0	vpu	GGG	0	0	0	vpu	GGG	0	0	0	vpu	GAC	0	0	0	vpu	GAA	0	0	0
vpu	GAT	0	0	0	vpu	GAG	0	0	0	env	AGA	0	0	0	vpu	AGT	0	0	0	vpu	GAA	0	0	0	vpu	AGT	0	0	0	vpu	GAT	0	0	0	vpu	GAT	0	0	0	vpu	AGT	0	0	0	vpu	AGA	0	0	0
vpu	CAG	0	0	0	vpu	GAA	0	0	0	env	GTG	0	0	0	vpu	GGC	0	0	0	vpu	ATG	0	0	0	vpu	GAA	0	0	0	vpu	CAA	0	0	0	vpu	CAA	0	0	0	vpu	GGC	0	0	0	vpu	GCA	0	0	0
vpu	GAA	0	0	0	vpu	TTA	0	0	0	env	AAG	0	0	0	vpu	AAT	0	0	0	vpu	GGG	0	0	0	vpu	GGG	0	0	0	vpu	GAA	0	0	0	vpu	GAA	0	0	0	vpu	AAT	0	0	0	vpu	GAG	0	0	0
vpu	GAA	0	0	0	vpu	TCA	0	0	0	env	GAG	0	0	0	vpu	GAA	0	0	0	vpu	CAC	0	0	0	vpu	GAT	0	0	0	vpu	GAA	0	0	0	vpu	GAG	0	0	0	vpu	GAG	0	0	0	vpu	GAC	0	0	0
vpu	TTA	0	0	0	vpu	CAA	0	0	0	env	ACC	0	0	0	vpu	AGT	0	0	0	vpu	CAT	0	0	0	vpu	CAA	0	0	0	vpu	TTA	0	0	0	vpu	TTA	0	0	0	vpu	AGT	0	0	0	vpu	AGT	0	0	0
vpu	TCA	0	0	0	vpu	CTT	0	0	0	env	AAG	0	0	0	vpu	GAA	0	0	0	vpu	GCT	0	0	0	vpu	GAA	0	0	0	vpu	TCA	0	0	0	vpu	TCA	0	0	0	vpu	GAA	0	0	0	vpu	GGC	0	0	0
vpu	GCA	0	0	0	vpu	GTG	0	0	0	env	AAG	0	0	0	vpu	GGG	0	0	0	vpu	CCT	0	0	0	vpu	GAA	0	0	0	vpu	GCC	0	0	0	vpu	AAA	0	0	0	vpu	GGG	0	0	0	vpu	AAT	0	0	0
vpu	TTT	0	0	0	vpu	GAG	0	0	0	env	AAC	0	0	0	vpu	GAT	0	0	0	vpu	TGG	1	3	0	vpu	TTA	0	0	0	vpu	ATG	0	0	0	vpu	CTT	0	0	0	vpu	GAT	0	0	0	vpu	GAG	0	0	0
vpu	TTG	0	0	0	vpu	AGA	0	0	0	env	TAT	0	0	0	vpu	CAG	0	0	0	vpu	GAT	0	0	0	vpu	TCG	0	0	0	vpu	TTG	0	0	0	vpu	ATG	0	0	0	vpu	CAG	0	0	0	vpu	AGT	0	0	0
vpu	GAA	0	0	0	vpu	GGG	0	0	0	env	CAG	0	0	0	vpu	GAA	0	0	0	vpu	ATT	0	0	0	vpu	GCA	0	0	0	vpu	GAC	0	0	0	vpu	GAG	0	0	0	vpu	GAA	0	0	0	vpu	GAC	0	0	0
vpu	GGG	0	0	0	vpu	CAC	0	0	0	env	CCC	0	0	0	vpu	GAA	0	0	0	vpu	GAT	0	0	0	vpu	CTT	0	0	0	vpu	ATG	0	0	0	vpu	ATG	0	0	0	vpu	GAA	0	0	0	vpu	GGG	0	0	0
vpu	GGG	0	0	0	vpu	CTT	0	0	0	env	TTA	0	0	0	vpu	TTA	0	0	0	vpu	GAT	0	0	0	vpu	GTG	0	0	0	vpu	GGG	0	0	0	vpu	GGG	0	0	0	vpu	TTA	0	0	0	vpu	GAT	0	0	0
vpu	CAT	0	0	0	vpu	GTT	0	0	0	env	TGG	0	1	0	vpu	TCA	0	0	0	vpu	TTG	0	1	0	vpu	GGG	0	0	0	vpu	CAC	0	0	0	vpu	CAC	0	0	0	vpu	TCA	0	0	0	vpu	CAA	0	0	0
vpu	CAT	0	0	0	vpu	CCT	0	0	0	env	ACA	0	0	0	vpu	GCA	0	0	0	vpu	TAG	0	0	0	vpu	ATG	0	0	0	vpu	CTT	0	0	0	vpu	CAT	0	0	0	vpu	GTG	0	0	0	vpu	GAA	0	0	0
vpu	GCT	0	0	0	vpu	TGG	0	2	0	env	GGG	0	0	0	vpu	CTT	0	0	0	env	ATG	0	0	0	vpu	GGG	0	0	0	vpu	GCT	0	0	0	vpu	GCT	0	0	0	vpu	CTT	0	0	0	vpu	GAA	0	0	0
vpu	CCT	0	0	0	vpu	GAT	0	0	0	env	GGC	0	0	0	vpu	GTG	0	0	0	env	AGA	0	0	0	vpu	CAT	0	0	0	vpu	CCT	0	0	0	vpu	CCT	0	0	0	vpu	GTG	0	0	0	vpu	TTG	0	0	0
vpu	TGG	2	5	0	vpu	GTT	0	0	0	env	ATC	0	0	0	vpu	GAG	0	0	0	env	GTG	0	0	0	vpu	CAT	0	0	0	vpu	TGG	0	0	0	vpu	TGG	1	7	0	vpu	GAA	0	0	0	vpu	TCA	0	0	0
vpu	GAT	0	0	0	vpu	GAT	0	0	0	env	TTG	0	0	0	vpu	GTG	0	0	0	env	ATG	0	0	0	vpu	GCT	0	0	0	vpu	AAT	0	0	0	vpu	AAT	0	0	0	vpu	AGG	0	0	0	vpu	GCA	0	0	0
vpu	GTT	0	0	0	vpu	GAT	0	0	0	env	CTC	0	0	0	vpu	GGG	0	0	0	env	GAG	0	0	0	vpu	CCT	0	0	0	vpu	GTT	0	0	0	vpu	GTT	0	0	0	vpu	GGG	0	0	0	vpu	CTT	0	0	0
vpu	AAT	0	0	0	vpu	CTG	0	0	0	env	CTT	0	0	0	vpu	CAA	0	0	0	env	ATC	0	0	0	vpu	TGG	1	3	0	vpu	AAT	0	0	0	vpu	GAT	0	0	0	vpu	CAT	0	0	0	vpu	GTG	0	0	0
vpu	GAT	0	0	0	vpu	TAG	0	0	0	env	GGA	0	0	0	vpu	CAT	0	0	0	env	AGG	0	0	0	vpu	AAT	0	0	0	vpu	GAC	0	0	0	vpu	GAT	0	0	0	vpu	CAT	0	0	0	vpu	GAA	0	0	0
vpu	CTG	0	0	0	env	ATG	0	0	0	env	ATG	0	0	0	vpu	GTG	0	0	0	env	AGG	0	0	0	vpu	ATT	0	0	0	vpu	CTG	0	0	0	vpu	CTG	0	0	0	vpu	GCT	0	0	0	vpu	ATG	0	0	0
vpu	TAG	0	0	0	env	AAA	0	0	0	env	TTG	0	0	0	vpu	GAG	0	0	0	env	AAT	0	0	0	vpu	GAT	0	0	0	vpu	TAG	0	0	0	vpu	TAG	0	0	0	vpu	CCT	0	0	0	vpu	GGG	0	0	0
env	ATG	0	0	0	env	GTG	0	0	0	env	ATG	0	0	0	vpu	AGG	0	0	0	env	TGG	0	0	0	vpu	GAT	0	0	0	env	ATG	0	0	0	env	ATG	0	0	0	vpu	TGG	3	0	1	vpu	AAT	0	0	0
env	AGA	0	0	0	env	ATG	0	0	0	env	ATC	0	0	0	vpu	GGG	0	0	0	env	CAG	0	0	0	vpu	CTG	0	0	0	env	AGA	0	0	0	env	ACA	0	0	0	vpu	GAT	0	0	0	vpu	CCT	0	0	0
env	GTG	0	0	0	env	GGG	0	0	0	env	TGT	0	0	0	vpu	CAT	0	0	0	env	CAC	0	0	0	vpu	TAG	0	0	0	env	GTG	0	0	0	env	GTG	0	0	0	vpu	GTT	0	0	0	vpu	GTG	0	0	0
env	AAG	0	0	0	env	ACC	0	0	0	env	AGT	0	0	0	vpu	AAT	0	0	0	env	TTG	0	0	0	env	ATG	0	0	0	env	AAG	0	0	0	env	AAG	0	0	0	vpu	GAT	0	0	0	vpu	GAA	0	0	0
env	GAG	0	0	0	env	AGG	0	0	0	env	GCT	0	0	0	vpu	GCT	0	0	0	env	TGG	0	0	0	env	AAA	0	0	0	env	GGG	0	0	0	env	GGG	0	0	0	vpu	GAT	0	0	0	vpu	ATG	0	0	0
env	ATC	0	0	0	env	AGG	0	0	0	env	ACA	0	0	0	vpu	CCT	0	0	0	env	AAA	0	0	0	env	GTG	0	0	0	env	ATC	0	0	0	env	ATC	0	0	0	vpu	CTG	0	0	0	vpu	GAG	0	0	0
env	AGG	0	0	0	env	AAT	0	0	0	env	GAA	0	0	0	vpu	TGG	1	0	0	env	TGG	0	2	0	env	AAG	0	0	0	env	AAG	0	0	0	env	AAG	0	0	0	vpu	TAG	0	0	0	vpu	CAT	0	0	0
env	AAG	0	0	0	env	TAT	0	0	0	env	AAG	0	0	0	vpu	GAT	0	0	0	env	GGC	0	0	0	env	GGG	0	0	0	env	AAG	0	0	0	env	AAG	0	0	0	env	ATG	0	0	0	vpu	CAT	0	0	0
env	AAT	0	0	0	env	CAC	0	0	0	env	TTA	0	0	0	vpu	GTT	0	0	0	env	ACC	0	0	0	env	ATC	0	0	0	env	AAT	0	0	0	env	AGT	0	0	0	env	AGA	0	0	0	vpu	GCT	0	0	0
env	TAT	0	0	0	env	AAC	0	0	0	env	TGG	2	2	0	vpu	AAT	0	0	0	env	ATG	0	0	0	env	AAG	0	0	0	env	TAT	0	0	0	env	TAT	0	0	0	env	GTG	0	0	0	vpu	CCT	0	0	0
env	CAG	0	0	0	env	TTG	0	0	0	env	GTC	0	0	0	vpu	GAT	0	0	0	env	CTC	0	0	0	env	AAG	0	0	0	env	CAG	0	0	0	env	CAA	0	0	0	env	AAG	0	0	0	vpu	TGG	1	0	0
env	CAT	0	0	0	env	TGG	0	1	0	env	ACA	0	0	0	vpu	CTG	0	0	0	env	CTT	0	0	0	env	AAT	0	0	0	env	CCA	0	0	0	env	AAC	0	0	0	env	GGG	0	0	0	vpu	GAT	0	0	0
env	TTT	0	0	0	env	AGA	0	0	0	env	GTC	0	0	0	vpu	TAA	0	0	0	env	GGG	0	0	0	env	TAT	0	0	0	env	TGT	0	0	0	env	TTA	0	0	0	env	ATC	0	0	0	vpu	GTT	0	0	0
env	TGG	0	0	0	env	GAG	0	0	0	env	TAT	0	0	0	env	ATG	0	0	0	env	ATA	0	0	0	env	CGG	0	0	0	env	TGG	0	0	0	env	TGG	2	4	0	env	AGG	0	0	0	vpu	AAT	0	0	0
env	AAG	0	0	0	env	GGC	0	0	0	env	TAT	0	0	0	env	AAA	0	0	0	env	TTG	0	0	0	env	CAC	0	0	0	env	ACA	0	0	0	env	AGA	0	0	0	env	AAG	0	0	0	vpu	GAT	0	0	0
env	GGG	0	0	0	env	ACC	0	0	0	env	GGG	0	0	0	env	GTG	0	0	0	env	ATG	0	0	0	env	TTG	0	0	0	env	TGG	0	0	0	env	TGG	6	0	0	env	AAT	0	0	0	vpu	CTG	0	0	0
env	GGC	0	0	0	env	TTG	0	0	0	env	GTA	0	0	0	env	AAG	0	0	0	env	ATT	0	0	0	env	TGG	1	1	1	env	GGC	0	0	0	env	GGC	0	0	0	env	TAT	0	0	0	vpu	TAA	0	0	0
env	ATC	0	0	0	env	TTC	0	0	0	env	CCT	0	0	0	env	GGG	0	0	0	env	TGT	0	0	0	env	GGA	0	0	0	env	ACC	0	0	0	env	ACC	0	0	0	env	CAG	0	0	0	env	ATG	0	0	0
env	ATG	0	0	0	env	CTT	0	0	0	env	GTG	0	0	0	env	ATC	0	0	0	env	AGT	0	0	0	env	TGG	1	2	0	env	TTG	0	0	0	env	ATG	0	0	0	env	TGC	0	0	0	env	AGA	0	0	0
env	CTC	0	0	0	env	GGG	0	0	0	env	TGG	1	3	1	env	AGG	0	0	0	env	GCT	0	0	0	env	GGC	0	0	0	env	CTC	0	0	0	env	CTC	0	0	0	env	TTG	0	0	0	env	GTG	0	0	0
env	CTT	0	0	0	env	ATG	0	0	0	env	AAA	0	0	0	env	AAG	0	0	0	env	GCA	0	0	0	env	ATC	0	0	0	env	CTT	0	0	0	env	CTT	0	0	0	env	TGG	1	1	0	env	ACG	0	0	0
env	GGG	0	0	0	env	TTG	0	0	0	env	GAA	0	0	0	env	AAT	0	0	0	env	GAA	0	0	0	env	ATG	0	0	0	env	GGA	0	0	0	env	GGA	0	0	0	env	AAA	0	0	0	env	GGG	0	0	0
[truncated: 1,210 more rows]
[truncated: 5 more columns]

## Sheet: Per_library
Progression	Patient	Library	Total_stops	a3g_stops	a3dfh_stops	rt_stops	Total a3_stops	High-level_a3	Low-level_a3
Fast	R3	1	28	27	1	0	28	1	0
Fast	R3	2	8	7	1	0	8	0	1
Fast	R3	3	4	1	3	0	4	0	1
Fast	R3	4	1	0	0	1	0	0	1
Fast	R3	5	18	7	11	0	18	1	0
Fast	R3	6	2	0	2	0	2	0	1
Fast	R3	7	29	29	0	0	29	1	0
Fast	R3	8	7	7	0	0	7	0	1
Fast	R3	9	40	39	1	0	40	1	0
Fast	R3	10	0	0	0	0	0	0	1
Fast	R5	1	1	0	1	0	1	0	1
Fast	R5	2	7	7	0	0	7	0	1
Fast	R5	3	3	2	1	0	3	0	1
Fast	R5	4	10	9	0	1	9	0	1
Fast	R5	5	42	38	4	0	42	1	0
Fast	R5	6	6	6	0	0	6	0	1
Fast	R5	7	0	0	0	0	0	0	1
Fast	R5	8	0	0	0	0	0	0	1
Fast	R5	9	10	10	0	0	10	0	1
Fast	R5	10	0	0	0	0	0	0	1
Fast	R6	1	6	0	5	1	5	0	1
Fast	R6	2	22	20	2	0	22	1	0
Fast	R6	3	33	31	1	1	32	1	0
Fast	R6	4	31	29	1	1	30	1	0
Fast	R6	5	21	21	0	0	21	1	0
Fast	R6	6	37	36	1	0	37	1	0
Fast	R6	7	44	44	0	0	44	1	0
Fast	R6	8	10	10	0	0	10	0	1
Fast	R6	9	55	51	4	0	55	1	0
Fast	R6	10	9	9	0	0	9	0	1
Fast	R7	1	18	13	4	1	17	1	0
Fast	R7	2	37	36	1	0	37	1	0
Fast	R7	3	20	17	2	1	19	1	0
Fast	R7	4	26	24	2	0	26	1	0
Fast	R7	5	0	0	0	0	0	0	1
Fast	R7	6	10	10	0	0	10	0	1
Fast	R7	7	0	0	0	0	0	0	1
Fast	R7	8	11	7	4	0	11	1	0
Fast	R7	9	28	15	13	0	28	1	0
Fast	R7	10	56	54	2	0	56	1	0
Fast	R8	1	0	0	0	0	0	0	1
Fast	R8	2	7	7	0	0	7	0	1
Fast	R8	3	28	27	1	0	28	1	0
Fast	R8	4	4	2	2	0	4	0	1
Fast	R8	5	18	17	1	0	18	1	0
Fast	R8	6	12	12	0	0	12	1	0
Fast	R8	7	0	0	0	0	0	0	1
Fast	R8	8	19	17	2	0	19	1	0
Fast	R8	9	6	6	0	0	6	0	1
Fast	R8	10	8	7	1	0	8	0	1
Normal	P6	1	0	0	0	0	0	0	1
Normal	P6	2	49	48	1	0	49	1	0
Normal	P6	3	93	87	6	0	93	1	0
Normal	P6	4	82	70	12	0	82	1	0
Normal	P6	5	69	66	3	0	69	1	0
Normal	P6	6	1	0	1	0	1	0	1
Normal	P6	7	0	0	0	0	0	0	1
Normal	P6	8	17	17	0	0	17	1	0
Normal	P6	9	5	2	3	0	5	0	1
Normal	P6	10	21	15	6	0	21	1	0
Normal	R11	1	54	52	1	1	53	1	0
Normal	R11	2	19	19	0	0	19	1	0
Normal	R11	3	40	39	1	0	40	1	0
Normal	R11	4	35	34	0	1	34	1	0
Normal	R11	5	34	21	13	0	34	1	0
Normal	R11	6	1	0	1	0	1	0	1
Normal	R11	7	7	7	0	0	7	0	1
Normal	R11	8	1	0	1	0	1	0	1
Normal	R11	9	7	7	0	0	7	0	1
Normal	R11	10	47	44	2	1	46	1	0
Normal	R14	1	15	14	1	0	15	1	0
Normal	R14	2	0	0	0	0	0	0	1
Normal	R14	3	45	44	0	1	44	1	0
Normal	R14	4	82	63	19	0	82	1	0
Normal	R14	5	22	20	2	0	22	1	0
Normal	R14	6	23	20	3	0	23	1	0
Normal	R14	7	24	23	1	0	24	1	0
Normal	R14	8	36	27	9	0	36	1	0
Normal	R14	9	11	11	0	0	11	1	0
Normal	R14	10	22	21	0	1	21	1	0
Normal	R15	1	72	60	12	0	72	1	0
Normal	R15	2	122	118	4	0	122	1	0
Normal	R15	3	74	67	7	0	74	1	0
Normal	R15	4	164	138	26	0	164	1	0
Normal	R15	5	108	103	5	0	108	1	0
Normal	R15	6	51	49	2	0	51	1	0
Normal	R15	7	89	88	1	0	89	1	0
Normal	R15	8	13	9	4	0	13	1	0
Normal	R15	9	90	65	25	0	90	1	0
Normal	R15	10	151	137	14	0	151	1	0
Normal	R4	1	2	2	0	0	2	0	1
Normal	R4	2	48	37	11	0	48	1	0
Normal	R4	3	6	6	0	0	6	0	1
Normal	R4	4	23	16	6	1	22	1	0
Normal	R4	5	8	4	4	0	8	0	1
Normal	R4	6	59	58	1	0	59	1	0
Normal	R4	7	9	8	1	0	9	0	1
Normal	R4	8	0	0	0	0	0	0	1
Normal	R4	9	0	0	0	0	0	0	1
Normal	R4	10	0	0	0	0	0	0	1
Normal	R9	1	75	68	7	0	75	1	0
Normal	R9	2	46	45	1	0	46	1	0
Normal	R9	3	34	29	4	1	33	1	0
Normal	R9	4	32	31	1	0	32	1	0
Normal	R9	5	0	0	0	0	0	0	1
Normal	R9	6	0	0	0	0	0	0	1
Normal	R9	7	1	0	0	1	0	0	1
Normal	R9	8	47	43	4	0	47	1	0
Normal	R9	9	0	0	0	0	0	0	1
Normal	R9	10	103	96	3	4	99	1	0
